# Supplementary material for: Autonomous optimization of an organic solar cell in a 4-dimensional parameter space
Source: Royal Society of Chemistry journal article supplement (doi:10.1039/d3ee02027d), 2023-01-01
Supplement: d3ee02027d1.csv [file d3ee02027d1.csv]

SampleNr	Wavelength [nm]	OD	Cell
1	300.0	2.1165	A-1
1	360.0	0.229	A-3
1	350.0	0.2605	A-3
1	340.0	0.3098	A-3
1	330.0	0.3944	A-3
1	320.0	0.5708	A-3
1	310.0	0.9309	A-3
1	300.0	1.5937	A-3
1	950.0	0.1418	B-2
1	940.0	0.1383	B-2
1	370.0	0.163	A-3
1	930.0	0.1358	B-2
1	910.0	0.1338	B-2
1	900.0	0.1347	B-2
1	890.0	0.1377	B-2
1	880.0	0.1424	B-2
1	870.0	0.1529	B-2
1	860.0	0.1708	B-2
1	850.0	0.1973	B-2
1	840.0	0.2354	B-2
1	830.0	0.2734	B-2
1	920.0	0.1341	B-2
1	380.0	0.0831	A-3
1	390.0	0.0596	A-3
1	400.0	0.0581	A-3
1	610.0	0.0527	A-3
1	600.0	0.0544	A-3
1	590.0	0.0563	A-3
1	580.0	0.0591	A-3
1	570.0	0.0624	A-3
1	560.0	0.0659	A-3
1	550.0	0.0703	A-3
1	540.0	0.0744	A-3
1	530.0	0.0791	A-3
1	520.0	0.0833	A-3
1	510.0	0.0878	A-3
1	500.0	0.0852	A-3
1	490.0	0.0947	A-3
1	480.0	0.0965	A-3
1	470.0	0.097	A-3
1	460.0	0.096	A-3
1	450.0	0.0846	A-3
1	440.0	0.0884	A-3
1	430.0	0.0813	A-3
1	420.0	0.0735	A-3
1	410.0	0.0642	A-3
1	820.0	0.3055	B-2
1	810.0	0.3427	B-2
1	800.0	0.3613	B-2
1	790.0	0.3657	B-2
1	530.0	0.6879	B-2
1	520.0	0.6414	B-2
1	510.0	0.5937	B-2
1	500.0	0.5479	B-2
1	490.0	0.5235	B-2
1	480.0	0.5038	B-2
1	470.0	0.4863	B-2
1	460.0	0.4708	B-2
1	450.0	0.4474	B-2
1	440.0	0.4418	B-2
1	430.0	0.4322	B-2
1	420.0	0.4273	B-2
1	410.0	0.4204	B-2
1	400.0	0.4219	B-2
1	390.0	0.4507	B-2
1	380.0	0.5161	B-2
1	370.0	0.6259	B-2
1	360.0	0.6952	B-2
1	350.0	0.7031	B-2
1	340.0	0.7208	B-2
1	330.0	0.7848	B-2
1	540.0	0.7427	B-2
1	620.0	0.0517	A-3
1	550.0	0.8089	B-2
1	570.0	0.9373	B-2
1	780.0	0.3584	B-2
1	770.0	0.3438	B-2
1	760.0	0.3265	B-2
1	750.0	0.3082	B-2
1	740.0	0.2921	B-2
1	730.0	0.279	B-2
1	720.0	0.2667	B-2
1	710.0	0.256	B-2
1	700.0	0.2454	B-2
1	690.0	0.2391	B-2
1	680.0	0.246	B-2
1	670.0	0.2899	B-2
1	660.0	0.3859	B-2
1	650.0	0.5621	B-2
1	640.0	0.7913	B-2
1	630.0	0.9491	B-2
1	620.0	1.0046	B-2
1	610.0	0.9833	B-2
1	600.0	0.9504	B-2
1	590.0	0.9466	B-2
1	580.0	0.9555	B-2
1	560.0	0.8834	B-2
1	630.0	0.0509	A-3
1	640.0	0.0508	A-3
1	650.0	0.0511	A-3
1	700.0	0.2431	B-3
1	690.0	0.2369	B-3
1	680.0	0.2446	B-3
1	670.0	0.2915	B-3
1	660.0	0.3919	B-3
1	650.0	0.5749	B-3
1	640.0	0.81	B-3
1	630.0	0.97	B-3
1	620.0	1.0271	B-3
1	610.0	1.0061	B-3
1	600.0	0.9729	B-3
1	590.0	0.969	B-3
1	580.0	0.9782	B-3
1	570.0	0.9599	B-3
1	560.0	0.9044	B-3
1	550.0	0.8279	B-3
1	540.0	0.7596	B-3
1	530.0	0.7035	B-3
1	520.0	0.6548	B-3
1	510.0	0.6054	B-3
1	500.0	0.5584	B-3
1	710.0	0.254	B-3
1	490.0	0.5327	B-3
1	720.0	0.265	B-3
1	740.0	0.2912	B-3
1	950.0	0.1385	B-3
1	940.0	0.1354	B-3
1	930.0	0.1328	B-3
1	920.0	0.1308	B-3
1	910.0	0.1307	B-3
1	900.0	0.1315	B-3
1	890.0	0.1344	B-3
1	880.0	0.1392	B-3
1	870.0	0.1497	B-3
1	860.0	0.1676	B-3
1	850.0	0.1937	B-3
1	840.0	0.2322	B-3
1	830.0	0.2707	B-3
1	820.0	0.304	B-3
1	810.0	0.3419	B-3
1	800.0	0.362	B-3
1	790.0	0.3666	B-3
1	780.0	0.3595	B-3
1	770.0	0.3442	B-3
1	760.0	0.3267	B-3
1	750.0	0.3081	B-3
1	730.0	0.2775	B-3
1	320.0	0.9639	B-2
1	480.0	0.5118	B-3
1	460.0	0.477	B-3
1	860.0	0.0889	A-3
1	850.0	0.088	A-3
1	840.0	0.0864	A-3
1	830.0	0.0853	A-3
1	820.0	0.0843	A-3
1	810.0	0.083	A-3
1	800.0	0.0812	A-3
1	790.0	0.0796	A-3
1	780.0	0.0776	A-3
1	770.0	0.0752	A-3
1	760.0	0.0734	A-3
1	750.0	0.0712	A-3
1	740.0	0.069	A-3
1	730.0	0.0665	A-3
1	720.0	0.0637	A-3
1	710.0	0.0612	A-3
1	700.0	0.0584	A-3
1	690.0	0.0559	A-3
1	680.0	0.0543	A-3
1	670.0	0.0526	A-3
1	660.0	0.0517	A-3
1	870.0	0.0895	A-3
1	470.0	0.4934	B-3
1	880.0	0.0904	A-3
1	900.0	0.0917	A-3
1	450.0	0.4529	B-3
1	440.0	0.4472	B-3
1	430.0	0.438	B-3
1	420.0	0.4336	B-3
1	410.0	0.4277	B-3
1	400.0	0.4296	B-3
1	390.0	0.4585	B-3
1	380.0	0.5223	B-3
1	370.0	0.6297	B-3
1	360.0	0.6999	B-3
1	350.0	0.7067	B-3
1	340.0	0.7243	B-3
1	330.0	0.789	B-3
1	320.0	0.9707	B-3
1	310.0	1.3621	B-3
1	300.0	2.0605	B-3
1	950.0	0.0943	A-3
1	940.0	0.0941	A-3
1	930.0	0.093	A-3
1	920.0	0.0924	A-3
1	910.0	0.0925	A-3
1	890.0	0.0911	A-3
1	310.0	1.3572	B-2
1	310.0	1.4293	A-1
1	950.0	0.1217	A-2
1	350.0	0.7011	B-1
1	340.0	0.7187	B-1
1	330.0	0.7837	B-1
1	320.0	0.965	B-1
1	310.0	1.3543	B-1
1	300.0	2.0484	B-1
1	950.0	0.1206	A-1
1	940.0	0.1178	A-1
1	930.0	0.1159	A-1
1	360.0	0.6943	B-1
1	920.0	0.1147	A-1
1	900.0	0.1164	A-1
1	890.0	0.1201	A-1
1	880.0	0.1258	A-1
1	870.0	0.138	A-1
1	860.0	0.1578	A-1
1	850.0	0.1885	A-1
1	840.0	0.2326	A-1
1	830.0	0.2779	A-1
1	820.0	0.3167	A-1
1	910.0	0.1151	A-1
1	370.0	0.6237	B-1
1	380.0	0.5158	B-1
1	390.0	0.4502	B-1
1	600.0	0.9609	B-1
1	590.0	0.9572	B-1
1	580.0	0.9658	B-1
1	570.0	0.948	B-1
1	560.0	0.8929	B-1
1	550.0	0.8168	B-1
1	540.0	0.7502	B-1
1	530.0	0.6942	B-1
1	520.0	0.6462	B-1
1	510.0	0.5969	B-1
1	500.0	0.5506	B-1
1	490.0	0.5256	B-1
1	480.0	0.5052	B-1
1	470.0	0.4871	B-1
1	460.0	0.4708	B-1
1	450.0	0.4472	B-1
1	440.0	0.4412	B-1
1	430.0	0.4318	B-1
1	420.0	0.427	B-1
1	410.0	0.4203	B-1
1	400.0	0.4222	B-1
1	810.0	0.3624	A-1
1	800.0	0.3862	A-1
1	790.0	0.3925	A-1
1	780.0	0.3855	A-1
1	520.0	0.7482	A-1
1	510.0	0.6881	A-1
1	500.0	0.6313	A-1
1	490.0	0.5968	A-1
1	480.0	0.5694	A-1
1	470.0	0.5448	A-1
1	460.0	0.5238	A-1
1	450.0	0.4972	A-1
1	440.0	0.4914	A-1
1	430.0	0.4855	A-1
1	420.0	0.486	A-1
1	410.0	0.4848	A-1
1	400.0	0.4889	A-1
1	390.0	0.5159	A-1
1	380.0	0.5777	A-1
1	370.0	0.685	A-1
1	360.0	0.7599	A-1
1	350.0	0.7678	A-1
1	340.0	0.7893	A-1
1	330.0	0.8598	A-1
1	320.0	1.0457	A-1
1	530.0	0.8071	A-1
1	610.0	0.9942	B-1
1	540.0	0.8723	A-1
1	560.0	1.0411	A-1
1	770.0	0.3686	A-1
1	760.0	0.3484	A-1
1	750.0	0.3268	A-1
1	740.0	0.3065	A-1
1	730.0	0.2905	A-1
1	720.0	0.2759	A-1
1	710.0	0.2637	A-1
1	700.0	0.2531	A-1
1	690.0	0.2505	A-1
1	680.0	0.2673	A-1
1	670.0	0.3338	A-1
1	660.0	0.4592	A-1
1	650.0	0.6668	A-1
1	640.0	0.927	A-1
1	630.0	1.1096	A-1
1	620.0	1.1761	A-1
1	610.0	1.1537	A-1
1	600.0	1.1167	A-1
1	590.0	1.1133	A-1
1	580.0	1.1247	A-1
1	570.0	1.1049	A-1
1	550.0	0.9528	A-1
1	620.0	1.0151	B-1
1	300.0	2.0567	B-2
1	640.0	0.8	B-1
1	690.0	0.2525	A-2
1	680.0	0.2683	A-2
1	670.0	0.3348	A-2
1	660.0	0.4565	A-2
1	650.0	0.6622	A-2
1	640.0	0.9228	A-2
1	630.0	1.1054	A-2
1	620.0	1.1703	A-2
1	610.0	1.1473	A-2
1	600.0	1.1099	A-2
1	590.0	1.1066	A-2
1	580.0	1.118	A-2
1	570.0	1.0973	A-2
1	560.0	1.0338	A-2
1	550.0	0.9469	A-2
1	540.0	0.8686	A-2
1	530.0	0.8023	A-2
1	520.0	0.7456	A-2
1	510.0	0.6849	A-2
1	500.0	0.6289	A-2
1	490.0	0.5957	A-2
1	710.0	0.2665	A-2
1	480.0	0.5687	A-2
1	720.0	0.2786	A-2
1	740.0	0.3092	A-2
1	630.0	0.9594	B-1
1	940.0	0.1191	A-2
1	930.0	0.1171	A-2
1	920.0	0.116	A-2
1	910.0	0.1162	A-2
1	900.0	0.1178	A-2
1	890.0	0.1216	A-2
1	880.0	0.1274	A-2
1	870.0	0.1393	A-2
1	860.0	0.1598	A-2
1	850.0	0.1909	A-2
1	840.0	0.2355	A-2
1	830.0	0.2808	A-2
1	820.0	0.32	A-2
1	810.0	0.3655	A-2
1	800.0	0.3896	A-2
1	790.0	0.3956	A-2
1	780.0	0.3883	A-2
1	770.0	0.371	A-2
1	760.0	0.3512	A-2
1	750.0	0.3292	A-2
1	730.0	0.2932	A-2
1	470.0	0.5433	A-2
1	700.0	0.2558	A-2
1	450.0	0.4959	A-2
1	860.0	0.1668	B-1
1	850.0	0.1934	B-1
1	840.0	0.2324	B-1
1	830.0	0.2698	B-1
1	820.0	0.3027	B-1
1	810.0	0.3405	B-1
1	800.0	0.3595	B-1
1	790.0	0.3637	B-1
1	770.0	0.3419	B-1
1	760.0	0.3246	B-1
1	750.0	0.3061	B-1
1	740.0	0.2894	B-1
1	730.0	0.276	B-1
1	720.0	0.2636	B-1
1	710.0	0.2528	B-1
1	700.0	0.2424	B-1
1	690.0	0.2357	B-1
1	680.0	0.2429	B-1
1	670.0	0.2885	B-1
1	660.0	0.3869	B-1
1	460.0	0.5221	A-2
1	870.0	0.1488	B-1
1	880.0	0.1385	B-1
1	780.0	0.3566	B-1
1	650.0	0.5668	B-1
1	890.0	0.1338	B-1
1	430.0	0.4845	A-2
1	420.0	0.4848	A-2
1	410.0	0.4835	A-2
1	400.0	0.4878	A-2
1	390.0	0.5155	A-2
1	380.0	0.5761	A-2
1	370.0	0.6876	A-2
1	360.0	0.762	A-2
1	350.0	0.7699	A-2
1	340.0	0.7908	A-2
1	440.0	0.4905	A-2
1	320.0	1.0429	A-2
1	330.0	0.8603	A-2
1	910.0	0.13	B-1
1	920.0	0.1303	B-1
1	930.0	0.1324	B-1
1	900.0	0.1307	B-1
1	950.0	0.1383	B-1
1	300.0	2.1182	A-2
1	310.0	1.4284	A-2
1	940.0	0.135	B-1
2	940.0	0.0934	B-2
2	350.0	0.2599	A-3
2	340.0	0.3103	A-3
2	330.0	0.3969	A-3
2	320.0	0.5787	A-3
2	310.0	0.946	A-3
2	360.0	0.2272	A-3
2	300.0	1.6277	A-3
2	950.0	0.0936	B-2
2	930.0	0.0931	B-2
2	880.0	0.0901	B-2
2	910.0	0.0924	B-2
2	900.0	0.0916	B-2
2	890.0	0.0909	B-2
2	870.0	0.0894	B-2
2	860.0	0.0898	B-2
2	850.0	0.0902	B-2
2	840.0	0.092	B-2
2	830.0	0.096	B-2
2	370.0	0.1592	A-3
2	920.0	0.0925	B-2
2	380.0	0.0829	A-3
2	610.0	0.0503	A-3
2	400.0	0.0575	A-3
2	820.0	0.1014	B-2
2	600.0	0.052	A-3
2	590.0	0.0542	A-3
2	580.0	0.0571	A-3
2	570.0	0.0604	A-3
2	560.0	0.064	A-3
2	550.0	0.0684	A-3
2	540.0	0.0725	A-3
2	530.0	0.0772	A-3
2	520.0	0.0813	A-3
2	510.0	0.0857	A-3
2	500.0	0.083	A-3
2	490.0	0.0924	A-3
2	480.0	0.094	A-3
2	470.0	0.0944	A-3
2	460.0	0.0934	A-3
2	450.0	0.0821	A-3
2	440.0	0.0859	A-3
2	430.0	0.0792	A-3
2	420.0	0.0718	A-3
2	410.0	0.063	A-3
2	390.0	0.0594	A-3
2	810.0	0.1119	B-2
2	330.0	1.0788	B-2
2	790.0	0.1349	B-2
2	530.0	1.3013	B-2
2	520.0	1.1903	B-2
2	510.0	1.074	B-2
2	500.0	0.9758	B-2
2	490.0	0.9049	B-2
2	480.0	0.8645	B-2
2	470.0	0.8283	B-2
2	460.0	0.8065	B-2
2	450.0	0.7783	B-2
2	440.0	0.7705	B-2
2	430.0	0.7638	B-2
2	420.0	0.7616	B-2
2	410.0	0.7485	B-2
2	400.0	0.7376	B-2
2	390.0	0.769	B-2
2	380.0	0.8637	B-2
2	370.0	1.0017	B-2
2	360.0	1.0738	B-2
2	350.0	1.0545	B-2
2	340.0	1.0358	B-2
2	620.0	0.049	A-3
2	540.0	1.4233	B-2
2	800.0	0.1234	B-2
2	550.0	1.5588	B-2
2	570.0	1.7682	B-2
2	780.0	0.1468	B-2
2	770.0	0.1551	B-2
2	760.0	0.16	B-2
2	750.0	0.1626	B-2
2	740.0	0.1643	B-2
2	730.0	0.1676	B-2
2	720.0	0.1734	B-2
2	710.0	0.1824	B-2
2	700.0	0.1949	B-2
2	690.0	0.2134	B-2
2	680.0	0.2451	B-2
2	670.0	0.3213	B-2
2	660.0	0.4789	B-2
2	650.0	0.7795	B-2
2	640.0	1.2131	B-2
2	630.0	1.5578	B-2
2	620.0	1.7305	B-2
2	610.0	1.7444	B-2
2	600.0	1.7157	B-2
2	590.0	1.728	B-2
2	580.0	1.7689	B-2
2	560.0	1.6869	B-2
2	630.0	0.0482	A-3
2	460.0	0.0909	B-3
2	650.0	0.048	A-3
2	710.0	0.0563	B-3
2	700.0	0.0538	B-3
2	690.0	0.0515	B-3
2	680.0	0.0498	B-3
2	670.0	0.0482	B-3
2	660.0	0.0475	B-3
2	650.0	0.047	B-3
2	640.0	0.047	B-3
2	630.0	0.0474	B-3
2	620.0	0.0483	B-3
2	610.0	0.0496	B-3
2	600.0	0.0515	B-3
2	590.0	0.0537	B-3
2	580.0	0.0566	B-3
2	570.0	0.0599	B-3
2	560.0	0.0635	B-3
2	550.0	0.0679	B-3
2	540.0	0.072	B-3
2	530.0	0.0765	B-3
2	520.0	0.0805	B-3
2	510.0	0.0847	B-3
2	720.0	0.0587	B-3
2	500.0	0.0818	B-3
2	730.0	0.0615	B-3
2	750.0	0.0662	B-3
2	320.0	1.2541	B-2
2	950.0	0.0913	B-3
2	940.0	0.0908	B-3
2	930.0	0.0904	B-3
2	920.0	0.0897	B-3
2	910.0	0.0894	B-3
2	900.0	0.0885	B-3
2	890.0	0.0878	B-3
2	880.0	0.0868	B-3
2	870.0	0.0859	B-3
2	860.0	0.0852	B-3
2	850.0	0.084	B-3
2	840.0	0.0823	B-3
2	830.0	0.081	B-3
2	820.0	0.08	B-3
2	810.0	0.0781	B-3
2	800.0	0.0763	B-3
2	790.0	0.0747	B-3
2	780.0	0.0729	B-3
2	770.0	0.0703	B-3
2	760.0	0.0684	B-3
2	740.0	0.0639	B-3
2	640.0	0.0478	A-3
2	490.0	0.0908	B-3
2	470.0	0.0922	B-3
2	860.0	0.0863	A-3
2	850.0	0.0849	A-3
2	840.0	0.0834	A-3
2	830.0	0.0822	A-3
2	820.0	0.081	A-3
2	810.0	0.0793	A-3
2	800.0	0.0776	A-3
2	790.0	0.0759	A-3
2	780.0	0.074	A-3
2	770.0	0.0715	A-3
2	760.0	0.0697	A-3
2	750.0	0.0675	A-3
2	740.0	0.0653	A-3
2	730.0	0.0628	A-3
2	720.0	0.06	A-3
2	710.0	0.0576	A-3
2	700.0	0.055	A-3
2	690.0	0.0526	A-3
2	680.0	0.0509	A-3
2	670.0	0.0494	A-3
2	660.0	0.0486	A-3
2	870.0	0.0867	A-3
2	480.0	0.0922	B-3
2	880.0	0.0879	A-3
2	900.0	0.0894	A-3
2	450.0	0.0792	B-3
2	440.0	0.0828	B-3
2	430.0	0.0758	B-3
2	420.0	0.0683	B-3
2	410.0	0.0596	B-3
2	400.0	0.0546	B-3
2	390.0	0.0575	B-3
2	380.0	0.0822	B-3
2	370.0	0.1633	B-3
2	360.0	0.2305	B-3
2	350.0	0.2618	B-3
2	340.0	0.312	B-3
2	330.0	0.3965	B-3
2	320.0	0.5753	B-3
2	310.0	0.9424	B-3
2	300.0	1.6103	B-3
2	950.0	0.0926	A-3
2	940.0	0.092	A-3
2	930.0	0.0916	A-3
2	920.0	0.0906	A-3
2	910.0	0.0902	A-3
2	890.0	0.0888	A-3
2	310.0	1.6505	B-2
2	300.0	2.3802	B-2
2	950.0	0.1066	A-2
2	350.0	0.9246	B-1
2	340.0	0.9256	B-1
2	330.0	0.9774	B-1
2	320.0	1.1444	B-1
2	310.0	1.5428	B-1
2	300.0	2.2856	B-1
2	950.0	0.0957	A-1
2	940.0	0.095	A-1
2	930.0	0.0944	A-1
2	920.0	0.0937	A-1
2	910.0	0.0937	A-1
2	900.0	0.093	A-1
2	890.0	0.0925	A-1
2	880.0	0.0919	A-1
2	870.0	0.0913	A-1
2	860.0	0.0917	A-1
2	850.0	0.0922	A-1
2	840.0	0.0944	A-1
2	830.0	0.0982	A-1
2	820.0	0.1032	A-1
2	810.0	0.1125	A-1
2	360.0	0.9294	B-1
2	800.0	0.1227	A-1
2	370.0	0.8566	B-1
2	390.0	0.6519	B-1
2	600.0	1.415	B-1
2	590.0	1.4237	B-1
2	580.0	1.4549	B-1
2	570.0	1.4472	B-1
2	560.0	1.379	B-1
2	550.0	1.2698	B-1
2	540.0	1.1623	B-1
2	530.0	1.0654	B-1
2	520.0	0.9772	B-1
2	510.0	0.8877	B-1
2	500.0	0.8049	B-1
2	490.0	0.7505	B-1
2	480.0	0.7164	B-1
2	470.0	0.689	B-1
2	460.0	0.6705	B-1
2	450.0	0.6478	B-1
2	440.0	0.646	B-1
2	430.0	0.6456	B-1
2	420.0	0.6494	B-1
2	410.0	0.6418	B-1
2	400.0	0.6319	B-1
2	380.0	0.7272	B-1
2	610.0	1.4439	B-1
2	790.0	0.131	A-1
2	770.0	0.1407	A-1
2	510.0	0.9091	A-1
2	500.0	0.8245	A-1
2	490.0	0.7686	A-1
2	480.0	0.7336	A-1
2	470.0	0.706	A-1
2	460.0	0.6878	A-1
2	450.0	0.6652	A-1
2	440.0	0.663	A-1
2	430.0	0.6623	A-1
2	420.0	0.6652	A-1
2	410.0	0.6565	A-1
2	400.0	0.6458	A-1
2	390.0	0.6666	A-1
2	380.0	0.7463	A-1
2	370.0	0.8767	A-1
2	360.0	0.9481	A-1
2	350.0	0.9417	A-1
2	340.0	0.9392	A-1
2	330.0	0.9896	A-1
2	320.0	1.1595	A-1
2	310.0	1.5528	A-1
2	520.0	1.002	A-1
2	780.0	0.138	A-1
2	530.0	1.0927	A-1
2	550.0	1.3039	A-1
2	760.0	0.1395	A-1
2	750.0	0.1357	A-1
2	740.0	0.1317	A-1
2	730.0	0.1304	A-1
2	720.0	0.134	A-1
2	710.0	0.145	A-1
2	700.0	0.1655	A-1
2	690.0	0.2004	A-1
2	680.0	0.2524	A-1
2	670.0	0.3482	A-1
2	660.0	0.4862	A-1
2	650.0	0.7251	A-1
2	640.0	1.0772	A-1
2	630.0	1.3521	A-1
2	620.0	1.4801	A-1
2	610.0	1.4812	A-1
2	600.0	1.4518	A-1
2	590.0	1.4613	A-1
2	580.0	1.4937	A-1
2	570.0	1.4867	A-1
2	560.0	1.4166	A-1
2	540.0	1.1921	A-1
2	620.0	1.4436	B-1
2	300.0	2.2984	A-1
2	640.0	1.0545	B-1
2	690.0	0.1613	A-2
2	680.0	0.2034	A-2
2	670.0	0.2881	A-2
2	660.0	0.4134	A-2
2	650.0	0.5451	A-2
2	640.0	0.6576	A-2
2	630.0	0.7038	A-2
2	620.0	0.7279	A-2
2	610.0	0.7302	A-2
2	600.0	0.7156	A-2
2	590.0	0.7378	A-2
2	580.0	0.7339	A-2
2	570.0	0.7053	A-2
2	560.0	0.7258	A-2
2	550.0	0.6823	A-2
2	540.0	0.6825	A-2
2	530.0	0.666	A-2
2	520.0	0.6692	A-2
2	510.0	0.651	A-2
2	500.0	0.5759	A-2
2	490.0	0.5891	A-2
2	710.0	0.1394	A-2
2	480.0	0.5336	A-2
2	720.0	0.1413	A-2
2	740.0	0.1498	A-2
2	630.0	1.3189	B-1
2	940.0	0.105	A-2
2	930.0	0.1034	A-2
2	920.0	0.1023	A-2
2	910.0	0.1014	A-2
2	900.0	0.1005	A-2
2	890.0	0.0996	A-2
2	880.0	0.0988	A-2
2	870.0	0.0983	A-2
2	860.0	0.099	A-2
2	850.0	0.0997	A-2
2	840.0	0.1023	A-2
2	830.0	0.1062	A-2
2	820.0	0.1116	A-2
2	810.0	0.1211	A-2
2	800.0	0.1327	A-2
2	790.0	0.1435	A-2
2	780.0	0.1543	A-2
2	770.0	0.1564	A-2
2	760.0	0.157	A-2
2	750.0	0.1532	A-2
2	730.0	0.1441	A-2
2	470.0	0.5889	A-2
2	700.0	0.1453	A-2
2	450.0	0.566	A-2
2	860.0	0.0931	B-1
2	850.0	0.0938	B-1
2	840.0	0.0958	B-1
2	830.0	0.0998	B-1
2	820.0	0.1045	B-1
2	810.0	0.1137	B-1
2	800.0	0.1232	B-1
2	790.0	0.131	B-1
2	770.0	0.1392	B-1
2	760.0	0.1373	B-1
2	750.0	0.1325	B-1
2	740.0	0.1274	B-1
2	730.0	0.1248	B-1
2	720.0	0.1272	B-1
2	710.0	0.1368	B-1
2	700.0	0.1561	B-1
2	690.0	0.1912	B-1
2	680.0	0.2441	B-1
2	670.0	0.343	B-1
2	660.0	0.4847	B-1
2	460.0	0.5654	A-2
2	870.0	0.0928	B-1
2	880.0	0.0932	B-1
2	780.0	0.1374	B-1
2	650.0	0.7168	B-1
2	890.0	0.0938	B-1
2	430.0	0.5496	A-2
2	420.0	0.557	A-2
2	410.0	0.5459	A-2
2	400.0	0.537	A-2
2	390.0	0.5551	A-2
2	380.0	0.5894	A-2
2	370.0	0.6981	A-2
2	360.0	0.7424	A-2
2	350.0	0.7955	A-2
2	340.0	0.8207	A-2
2	440.0	0.562	A-2
2	320.0	1.076	A-2
2	330.0	0.8914	A-2
2	910.0	0.0948	B-1
2	920.0	0.095	B-1
2	930.0	0.0958	B-1
2	900.0	0.0942	B-1
2	950.0	0.0974	B-1
2	300.0	2.1552	A-2
2	310.0	1.4633	A-2
2	940.0	0.0966	B-1
3	940.0	0.1356	B-2
3	350.0	0.4528	A-3
3	340.0	0.5062	A-3
3	330.0	0.6038	A-3
3	320.0	0.8158	A-3
3	310.0	1.2229	A-3
3	360.0	0.4236	A-3
3	300.0	1.9202	A-3
3	950.0	0.1353	B-2
3	930.0	0.1361	B-2
3	880.0	0.158	B-2
3	910.0	0.1396	B-2
3	900.0	0.1438	B-2
3	890.0	0.1503	B-2
3	870.0	0.1708	B-2
3	860.0	0.1858	B-2
3	850.0	0.1994	B-2
3	840.0	0.2095	B-2
3	830.0	0.2136	B-2
3	370.0	0.3635	A-3
3	920.0	0.1373	B-2
3	380.0	0.2965	A-3
3	610.0	0.1896	A-3
3	400.0	0.2555	A-3
3	820.0	0.2141	B-2
3	600.0	0.1923	A-3
3	590.0	0.1963	A-3
3	580.0	0.2002	A-3
3	570.0	0.2032	A-3
3	560.0	0.2051	A-3
3	550.0	0.2065	A-3
3	540.0	0.208	A-3
3	530.0	0.2107	A-3
3	520.0	0.2131	A-3
3	510.0	0.2158	A-3
3	500.0	0.2123	A-3
3	490.0	0.2213	A-3
3	480.0	0.2224	A-3
3	470.0	0.2211	A-3
3	460.0	0.2188	A-3
3	450.0	0.2089	A-3
3	440.0	0.22	A-3
3	430.0	0.227	A-3
3	420.0	0.2361	A-3
3	410.0	0.2457	A-3
3	390.0	0.2712	A-3
3	810.0	0.2101	B-2
3	330.0	0.6149	B-2
3	790.0	0.1962	B-2
3	530.0	0.215	B-2
3	520.0	0.2176	B-2
3	510.0	0.2205	B-2
3	500.0	0.2172	B-2
3	490.0	0.2267	B-2
3	480.0	0.2281	B-2
3	470.0	0.2272	B-2
3	460.0	0.2252	B-2
3	450.0	0.2155	B-2
3	440.0	0.2267	B-2
3	430.0	0.2341	B-2
3	420.0	0.2433	B-2
3	410.0	0.2524	B-2
3	400.0	0.2619	B-2
3	390.0	0.2771	B-2
3	380.0	0.3023	B-2
3	370.0	0.3673	B-2
3	360.0	0.4284	B-2
3	350.0	0.4591	B-2
3	340.0	0.5136	B-2
3	620.0	0.188	A-3
3	540.0	0.2121	B-2
3	800.0	0.2032	B-2
3	550.0	0.2107	B-2
3	570.0	0.2074	B-2
3	780.0	0.188	B-2
3	770.0	0.1815	B-2
3	760.0	0.1772	B-2
3	750.0	0.1742	B-2
3	740.0	0.1723	B-2
3	730.0	0.1706	B-2
3	720.0	0.169	B-2
3	710.0	0.1683	B-2
3	700.0	0.1677	B-2
3	690.0	0.1672	B-2
3	680.0	0.167	B-2
3	670.0	0.1689	B-2
3	660.0	0.1727	B-2
3	650.0	0.179	B-2
3	640.0	0.1859	B-2
3	630.0	0.1908	B-2
3	620.0	0.1933	B-2
3	610.0	0.1945	B-2
3	600.0	0.197	B-2
3	590.0	0.2009	B-2
3	580.0	0.2047	B-2
3	560.0	0.2092	B-2
3	630.0	0.1851	A-3
3	460.0	0.2216	B-3
3	650.0	0.1733	A-3
3	710.0	0.1655	B-3
3	700.0	0.1652	B-3
3	690.0	0.1644	B-3
3	680.0	0.1642	B-3
3	670.0	0.1661	B-3
3	660.0	0.1701	B-3
3	650.0	0.176	B-3
3	640.0	0.1829	B-3
3	630.0	0.188	B-3
3	620.0	0.1904	B-3
3	610.0	0.1918	B-3
3	600.0	0.1944	B-3
3	590.0	0.1983	B-3
3	580.0	0.202	B-3
3	570.0	0.205	B-3
3	560.0	0.2068	B-3
3	550.0	0.2083	B-3
3	540.0	0.2098	B-3
3	530.0	0.2124	B-3
3	520.0	0.2151	B-3
3	510.0	0.2179	B-3
3	720.0	0.1662	B-3
3	500.0	0.2143	B-3
3	730.0	0.1679	B-3
3	750.0	0.1718	B-3
3	320.0	0.8256	B-2
3	950.0	0.1343	B-3
3	940.0	0.1346	B-3
3	930.0	0.1352	B-3
3	920.0	0.1361	B-3
3	910.0	0.1385	B-3
3	900.0	0.1426	B-3
3	890.0	0.149	B-3
3	880.0	0.1567	B-3
3	870.0	0.169	B-3
3	860.0	0.1833	B-3
3	850.0	0.197	B-3
3	840.0	0.2064	B-3
3	830.0	0.2107	B-3
3	820.0	0.2114	B-3
3	810.0	0.2072	B-3
3	800.0	0.2007	B-3
3	790.0	0.1934	B-3
3	780.0	0.1857	B-3
3	770.0	0.1792	B-3
3	760.0	0.1748	B-3
3	740.0	0.1697	B-3
3	640.0	0.1803	A-3
3	490.0	0.2236	B-3
3	470.0	0.2238	B-3
3	860.0	0.1808	A-3
3	850.0	0.1934	A-3
3	840.0	0.2028	A-3
3	830.0	0.2072	A-3
3	820.0	0.2079	A-3
3	810.0	0.2043	A-3
3	800.0	0.1979	A-3
3	790.0	0.191	A-3
3	780.0	0.1831	A-3
3	770.0	0.1766	A-3
3	760.0	0.1723	A-3
3	750.0	0.1693	A-3
3	740.0	0.1672	A-3
3	730.0	0.1652	A-3
3	720.0	0.1637	A-3
3	710.0	0.1628	A-3
3	700.0	0.1622	A-3
3	690.0	0.1619	A-3
3	680.0	0.1617	A-3
3	670.0	0.1635	A-3
3	660.0	0.1671	A-3
3	870.0	0.1665	A-3
3	480.0	0.2249	B-3
3	880.0	0.1544	A-3
3	900.0	0.1409	A-3
3	450.0	0.2114	B-3
3	440.0	0.2227	B-3
3	430.0	0.2301	B-3
3	420.0	0.2391	B-3
3	410.0	0.2481	B-3
3	400.0	0.2578	B-3
3	390.0	0.2728	B-3
3	380.0	0.2981	B-3
3	370.0	0.3636	B-3
3	360.0	0.4243	B-3
3	350.0	0.4535	B-3
3	340.0	0.5078	B-3
3	330.0	0.6061	B-3
3	320.0	0.8169	B-3
3	310.0	1.2189	B-3
3	300.0	1.9302	B-3
3	950.0	0.1334	A-3
3	940.0	0.1334	A-3
3	930.0	0.1337	A-3
3	920.0	0.1349	A-3
3	910.0	0.1374	A-3
3	890.0	0.1471	A-3
3	310.0	1.2335	B-2
3	300.0	1.9532	A-1
3	950.0	0.1341	A-2
3	350.0	0.4553	B-1
3	340.0	0.5096	B-1
3	330.0	0.6075	B-1
3	320.0	0.8211	B-1
3	310.0	1.229	B-1
3	300.0	1.9333	B-1
3	950.0	0.1469	A-1
3	940.0	0.1482	A-1
3	930.0	0.1484	A-1
3	920.0	0.1493	A-1
3	910.0	0.1501	A-1
3	900.0	0.1546	A-1
3	890.0	0.1607	A-1
3	880.0	0.1693	A-1
3	870.0	0.1801	A-1
3	860.0	0.1938	A-1
3	850.0	0.2073	A-1
3	840.0	0.2157	A-1
3	830.0	0.2198	A-1
3	820.0	0.2211	A-1
3	810.0	0.2159	A-1
3	360.0	0.4254	B-1
3	800.0	0.2101	A-1
3	370.0	0.3637	B-1
3	390.0	0.2712	B-1
3	600.0	0.1927	B-1
3	590.0	0.1966	B-1
3	580.0	0.2004	B-1
3	570.0	0.2034	B-1
3	560.0	0.2053	B-1
3	550.0	0.2066	B-1
3	540.0	0.2082	B-1
3	530.0	0.2109	B-1
3	520.0	0.2135	B-1
3	510.0	0.2163	B-1
3	500.0	0.2129	B-1
3	490.0	0.2223	B-1
3	480.0	0.2236	B-1
3	470.0	0.2224	B-1
3	460.0	0.22	B-1
3	450.0	0.2101	B-1
3	440.0	0.2211	B-1
3	430.0	0.2282	B-1
3	420.0	0.2375	B-1
3	410.0	0.2463	B-1
3	400.0	0.2558	B-1
3	380.0	0.2968	B-1
3	610.0	0.1901	B-1
3	790.0	0.2037	A-1
3	770.0	0.1881	A-1
3	510.0	0.2261	A-1
3	500.0	0.2228	A-1
3	490.0	0.2322	A-1
3	480.0	0.2332	A-1
3	470.0	0.232	A-1
3	460.0	0.2288	A-1
3	450.0	0.2184	A-1
3	440.0	0.2296	A-1
3	430.0	0.2377	A-1
3	420.0	0.2473	A-1
3	410.0	0.2563	A-1
3	400.0	0.2658	A-1
3	390.0	0.282	A-1
3	380.0	0.3078	A-1
3	370.0	0.3737	A-1
3	360.0	0.4355	A-1
3	350.0	0.4648	A-1
3	340.0	0.519	A-1
3	330.0	0.6176	A-1
3	320.0	0.8259	A-1
3	300.0	1.9395	B-2
3	520.0	0.2236	A-1
3	780.0	0.1957	A-1
3	530.0	0.221	A-1
3	550.0	0.2169	A-1
3	760.0	0.1848	A-1
3	750.0	0.181	A-1
3	740.0	0.1789	A-1
3	730.0	0.1769	A-1
3	720.0	0.1747	A-1
3	710.0	0.1749	A-1
3	700.0	0.1742	A-1
3	690.0	0.1738	A-1
3	680.0	0.1731	A-1
3	670.0	0.1752	A-1
3	660.0	0.1803	A-1
3	650.0	0.1855	A-1
3	640.0	0.1922	A-1
3	630.0	0.1976	A-1
3	620.0	0.2001	A-1
3	610.0	0.2016	A-1
3	600.0	0.2043	A-1
3	590.0	0.2076	A-1
3	580.0	0.211	A-1
3	570.0	0.214	A-1
3	560.0	0.2163	A-1
3	540.0	0.2184	A-1
3	620.0	0.1885	B-1
3	310.0	1.2396	A-1
3	640.0	0.181	B-1
3	690.0	0.1629	A-2
3	680.0	0.1629	A-2
3	670.0	0.1647	A-2
3	660.0	0.1686	A-2
3	650.0	0.1744	A-2
3	640.0	0.1809	A-2
3	630.0	0.1862	A-2
3	620.0	0.1887	A-2
3	610.0	0.1902	A-2
3	600.0	0.1929	A-2
3	590.0	0.1969	A-2
3	580.0	0.2006	A-2
3	570.0	0.2036	A-2
3	560.0	0.2055	A-2
3	550.0	0.207	A-2
3	540.0	0.2084	A-2
3	530.0	0.2112	A-2
3	520.0	0.2138	A-2
3	510.0	0.2167	A-2
3	500.0	0.2132	A-2
3	490.0	0.2225	A-2
3	630.0	0.1859	B-1
3	480.0	0.2237	A-2
3	710.0	0.1641	A-2
3	730.0	0.1666	A-2
3	940.0	0.134	A-2
3	930.0	0.1344	A-2
3	920.0	0.1356	A-2
3	910.0	0.138	A-2
3	900.0	0.1416	A-2
3	890.0	0.1479	A-2
3	880.0	0.1554	A-2
3	870.0	0.1676	A-2
3	860.0	0.1817	A-2
3	850.0	0.1947	A-2
3	840.0	0.2041	A-2
3	830.0	0.2081	A-2
3	820.0	0.2091	A-2
3	810.0	0.2055	A-2
3	800.0	0.1991	A-2
3	790.0	0.1921	A-2
3	780.0	0.1846	A-2
3	770.0	0.1778	A-2
3	760.0	0.1735	A-2
3	750.0	0.1704	A-2
3	740.0	0.1684	A-2
3	720.0	0.165	A-2
3	470.0	0.2225	A-2
3	700.0	0.1637	A-2
3	450.0	0.2101	A-2
3	850.0	0.1931	B-1
3	840.0	0.2027	B-1
3	830.0	0.2072	B-1
3	820.0	0.2082	B-1
3	810.0	0.2044	B-1
3	800.0	0.1982	B-1
3	790.0	0.1913	B-1
3	780.0	0.1837	B-1
3	760.0	0.1728	B-1
3	750.0	0.1697	B-1
3	740.0	0.1677	B-1
3	730.0	0.1659	B-1
3	720.0	0.1644	B-1
3	710.0	0.1637	B-1
3	700.0	0.1632	B-1
3	690.0	0.1627	B-1
3	680.0	0.1625	B-1
3	670.0	0.1643	B-1
3	660.0	0.1681	B-1
3	650.0	0.1741	B-1
3	460.0	0.2202	A-2
3	860.0	0.1799	B-1
3	870.0	0.1661	B-1
3	770.0	0.177	B-1
3	890.0	0.1473	B-1
3	880.0	0.1547	B-1
3	430.0	0.2282	A-2
3	420.0	0.2374	A-2
3	410.0	0.2462	A-2
3	400.0	0.2559	A-2
3	390.0	0.2716	A-2
3	380.0	0.297	A-2
3	370.0	0.3636	A-2
3	360.0	0.425	A-2
3	350.0	0.4548	A-2
3	340.0	0.5088	A-2
3	440.0	0.2212	A-2
3	320.0	0.8167	A-2
3	330.0	0.6089	A-2
3	910.0	0.1378	B-1
3	920.0	0.1356	B-1
3	930.0	0.1348	B-1
3	900.0	0.1416	B-1
3	950.0	0.1344	B-1
3	300.0	1.9343	A-2
3	310.0	1.2291	A-2
3	940.0	0.1346	B-1
4	930.0	0.1608	B-2
4	340.0	0.6838	A-3
4	330.0	0.7702	A-3
4	320.0	0.958	A-3
4	310.0	1.3426	A-3
4	300.0	2.0575	A-3
4	350.0	0.6337	A-3
4	950.0	0.1586	B-2
4	940.0	0.1589	B-2
4	920.0	0.1645	B-2
4	870.0	0.2433	B-2
4	900.0	0.1806	B-2
4	890.0	0.1955	B-2
4	880.0	0.2132	B-2
4	860.0	0.2828	B-2
4	850.0	0.3287	B-2
4	840.0	0.3771	B-2
4	830.0	0.4105	B-2
4	820.0	0.4296	B-2
4	360.0	0.6021	A-3
4	910.0	0.1706	B-2
4	370.0	0.521	A-3
4	610.0	0.5524	A-3
4	390.0	0.3583	A-3
4	600.0	0.5287	A-3
4	590.0	0.5232	A-3
4	580.0	0.5217	A-3
4	570.0	0.5062	A-3
4	560.0	0.4771	A-3
4	550.0	0.446	A-3
4	540.0	0.4217	A-3
4	530.0	0.4048	A-3
4	520.0	0.3902	A-3
4	510.0	0.3777	A-3
4	500.0	0.3633	A-3
4	490.0	0.3657	A-3
4	480.0	0.3646	A-3
4	470.0	0.3631	A-3
4	460.0	0.3604	A-3
4	450.0	0.3478	A-3
4	440.0	0.3514	A-3
4	430.0	0.3487	A-3
4	420.0	0.3481	A-3
4	410.0	0.3446	A-3
4	400.0	0.343	A-3
4	380.0	0.4097	A-3
4	810.0	0.4386	B-2
4	330.0	0.773	B-2
4	790.0	0.4131	B-2
4	530.0	0.4167	B-2
4	520.0	0.4018	B-2
4	510.0	0.3887	B-2
4	500.0	0.3739	B-2
4	490.0	0.376	B-2
4	480.0	0.3748	B-2
4	470.0	0.3731	B-2
4	460.0	0.3701	B-2
4	450.0	0.3571	B-2
4	440.0	0.3603	B-2
4	430.0	0.3571	B-2
4	420.0	0.3563	B-2
4	410.0	0.3526	B-2
4	400.0	0.3516	B-2
4	390.0	0.3683	B-2
4	380.0	0.4203	B-2
4	370.0	0.5294	B-2
4	360.0	0.6078	B-2
4	350.0	0.6391	B-2
4	340.0	0.688	B-2
4	620.0	0.5806	A-3
4	540.0	0.4349	B-2
4	800.0	0.4298	B-2
4	550.0	0.4599	B-2
4	570.0	0.5222	B-2
4	780.0	0.391	B-2
4	770.0	0.3696	B-2
4	760.0	0.3535	B-2
4	750.0	0.3412	B-2
4	740.0	0.3316	B-2
4	730.0	0.3227	B-2
4	720.0	0.3121	B-2
4	710.0	0.3012	B-2
4	700.0	0.29	B-2
4	690.0	0.2834	B-2
4	680.0	0.2865	B-2
4	670.0	0.3097	B-2
4	660.0	0.3563	B-2
4	650.0	0.4371	B-2
4	640.0	0.539	B-2
4	630.0	0.596	B-2
4	620.0	0.5982	B-2
4	610.0	0.5692	B-2
4	600.0	0.5451	B-2
4	590.0	0.5398	B-2
4	580.0	0.5383	B-2
4	560.0	0.4924	B-2
4	630.0	0.5797	A-3
4	460.0	0.3785	B-3
4	650.0	0.4295	A-3
4	700.0	0.2954	B-3
4	690.0	0.2881	B-3
4	680.0	0.2907	B-3
4	670.0	0.3133	B-3
4	660.0	0.3597	B-3
4	650.0	0.4441	B-3
4	640.0	0.5465	B-3
4	630.0	0.6046	B-3
4	620.0	0.6064	B-3
4	710.0	0.3079	B-3
4	610.0	0.5777	B-3
4	590.0	0.5478	B-3
4	580.0	0.5467	B-3
4	570.0	0.5306	B-3
4	560.0	0.501	B-3
4	550.0	0.4677	B-3
4	540.0	0.4434	B-3
4	530.0	0.4261	B-3
4	520.0	0.4114	B-3
4	510.0	0.3984	B-3
4	600.0	0.5531	B-3
4	720.0	0.3196	B-3
4	730.0	0.3311	B-3
4	740.0	0.3403	B-3
4	950.0	0.1597	B-3
4	940.0	0.1604	B-3
4	930.0	0.1621	B-3
4	920.0	0.1664	B-3
4	910.0	0.1723	B-3
4	900.0	0.1827	B-3
4	890.0	0.1983	B-3
4	880.0	0.2169	B-3
4	870.0	0.2481	B-3
4	860.0	0.2894	B-3
4	850.0	0.3375	B-3
4	840.0	0.388	B-3
4	830.0	0.4229	B-3
4	820.0	0.4428	B-3
4	810.0	0.4513	B-3
4	800.0	0.4422	B-3
4	790.0	0.4249	B-3
4	780.0	0.4016	B-3
4	770.0	0.3796	B-3
4	760.0	0.363	B-3
4	750.0	0.3504	B-3
4	500.0	0.3837	B-3
4	490.0	0.3863	B-3
4	480.0	0.385	B-3
4	470.0	0.3826	B-3
4	860.0	0.283	A-3
4	850.0	0.3281	A-3
4	840.0	0.3752	A-3
4	830.0	0.4076	A-3
4	820.0	0.4258	A-3
4	810.0	0.4333	A-3
4	800.0	0.4239	A-3
4	790.0	0.408	A-3
4	780.0	0.3855	A-3
4	770.0	0.3646	A-3
4	760.0	0.349	A-3
4	750.0	0.337	A-3
4	740.0	0.3277	A-3
4	730.0	0.3189	A-3
4	720.0	0.3084	A-3
4	710.0	0.2973	A-3
4	700.0	0.2867	A-3
4	690.0	0.2804	A-3
4	680.0	0.2836	A-3
4	670.0	0.3064	A-3
4	660.0	0.3516	A-3
4	870.0	0.2437	A-3
4	320.0	0.9592	B-2
4	880.0	0.214	A-3
4	900.0	0.1812	A-3
4	450.0	0.3645	B-3
4	440.0	0.3668	B-3
4	430.0	0.3625	B-3
4	420.0	0.361	B-3
4	410.0	0.3574	B-3
4	400.0	0.3568	B-3
4	390.0	0.3749	B-3
4	380.0	0.4295	B-3
4	370.0	0.5388	B-3
4	360.0	0.6182	B-3
4	350.0	0.6487	B-3
4	340.0	0.6969	B-3
4	330.0	0.7807	B-3
4	320.0	0.9688	B-3
4	310.0	1.3553	B-3
4	300.0	2.0722	B-3
4	950.0	0.1593	A-3
4	940.0	0.1594	A-3
4	930.0	0.1611	A-3
4	920.0	0.1654	A-3
4	910.0	0.171	A-3
4	890.0	0.1961	A-3
4	310.0	1.3494	B-2
4	640.0	0.5265	A-3
4	300.0	2.0533	B-2
4	340.0	0.3116	B-1
4	330.0	0.3988	B-1
4	320.0	0.583	B-1
4	310.0	0.9527	B-1
4	300.0	1.6339	B-1
4	950.0	0.1611	A-1
4	940.0	0.1616	A-1
4	930.0	0.1637	A-1
4	920.0	0.1681	A-1
4	910.0	0.1741	A-1
4	900.0	0.1847	A-1
4	890.0	0.2002	A-1
4	880.0	0.2185	A-1
4	870.0	0.2491	A-1
4	860.0	0.2888	A-1
4	850.0	0.3351	A-1
4	840.0	0.382	A-1
4	830.0	0.4145	A-1
4	820.0	0.4324	A-1
4	810.0	0.4399	A-1
4	800.0	0.431	A-1
4	350.0	0.2586	B-1
4	790.0	0.4137	A-1
4	360.0	0.2244	B-1
4	380.0	0.0827	B-1
4	590.0	0.057	B-1
4	580.0	0.0598	B-1
4	570.0	0.0629	B-1
4	560.0	0.0664	B-1
4	550.0	0.0708	B-1
4	540.0	0.0749	B-1
4	530.0	0.0798	B-1
4	520.0	0.0836	B-1
4	510.0	0.0883	B-1
4	500.0	0.086	B-1
4	490.0	0.0968	B-1
4	480.0	0.099	B-1
4	470.0	0.099	B-1
4	460.0	0.0986	B-1
4	450.0	0.0884	B-1
4	440.0	0.0935	B-1
4	430.0	0.087	B-1
4	420.0	0.0801	B-1
4	410.0	0.0711	B-1
4	400.0	0.0647	B-1
4	390.0	0.0639	B-1
4	370.0	0.1584	B-1
4	600.0	0.0545	B-1
4	780.0	0.391	A-1
4	760.0	0.3548	A-1
4	500.0	0.3637	A-1
4	490.0	0.3663	A-1
4	480.0	0.3656	A-1
4	470.0	0.3643	A-1
4	460.0	0.362	A-1
4	450.0	0.3503	A-1
4	440.0	0.3552	A-1
4	430.0	0.3538	A-1
4	420.0	0.3545	A-1
4	410.0	0.3525	A-1
4	400.0	0.3518	A-1
4	390.0	0.3666	A-1
4	380.0	0.4154	A-1
4	370.0	0.5179	A-1
4	360.0	0.598	A-1
4	350.0	0.6299	A-1
4	340.0	0.6821	A-1
4	330.0	0.7694	A-1
4	320.0	0.9601	A-1
4	310.0	1.3511	A-1
4	950.0	0.1581	A-2
4	510.0	0.3779	A-1
4	770.0	0.3703	A-1
4	520.0	0.3907	A-1
4	540.0	0.4221	A-1
4	750.0	0.3427	A-1
4	740.0	0.3335	A-1
4	730.0	0.3247	A-1
4	720.0	0.3141	A-1
4	710.0	0.3033	A-1
4	700.0	0.2926	A-1
4	690.0	0.2861	A-1
4	680.0	0.2893	A-1
4	670.0	0.3119	A-1
4	660.0	0.3568	A-1
4	650.0	0.4343	A-1
4	640.0	0.5291	A-1
4	630.0	0.5814	A-1
4	620.0	0.582	A-1
4	610.0	0.5539	A-1
4	600.0	0.5299	A-1
4	590.0	0.5241	A-1
4	580.0	0.5219	A-1
4	570.0	0.506	A-1
4	560.0	0.4773	A-1
4	550.0	0.4459	A-1
4	530.0	0.4049	A-1
4	610.0	0.0538	B-1
4	300.0	2.066	A-1
4	630.0	0.0513	B-1
4	620.0	0.0524	B-1
4	680.0	0.2871	A-2
4	670.0	0.3099	A-2
4	660.0	0.3576	A-2
4	650.0	0.4411	A-2
4	640.0	0.5442	A-2
4	630.0	0.6028	A-2
4	620.0	0.6053	A-2
4	610.0	0.5763	A-2
4	600.0	0.5523	A-2
4	590.0	0.5473	A-2
4	580.0	0.5462	A-2
4	570.0	0.5309	A-2
4	560.0	0.5003	A-2
4	550.0	0.4676	A-2
4	540.0	0.4423	A-2
4	530.0	0.424	A-2
4	520.0	0.4091	A-2
4	510.0	0.3961	A-2
4	500.0	0.3809	A-2
4	490.0	0.3824	A-2
4	700.0	0.2912	A-2
4	480.0	0.3808	A-2
4	710.0	0.3027	A-2
4	730.0	0.325	A-2
4	940.0	0.1585	A-2
4	930.0	0.16	A-2
4	920.0	0.1643	A-2
4	910.0	0.17	A-2
4	900.0	0.1801	A-2
4	890.0	0.1949	A-2
4	880.0	0.2128	A-2
4	870.0	0.243	A-2
4	860.0	0.2828	A-2
4	850.0	0.33	A-2
4	840.0	0.3786	A-2
4	830.0	0.4129	A-2
4	820.0	0.4326	A-2
4	810.0	0.4419	A-2
4	800.0	0.4333	A-2
4	790.0	0.4167	A-2
4	780.0	0.394	A-2
4	770.0	0.3728	A-2
4	760.0	0.3566	A-2
4	750.0	0.3439	A-2
4	740.0	0.3343	A-2
4	720.0	0.3142	A-2
4	470.0	0.3791	A-2
4	690.0	0.2842	A-2
4	450.0	0.3616	A-2
4	840.0	0.0858	B-1
4	830.0	0.0845	B-1
4	820.0	0.0838	B-1
4	810.0	0.0821	B-1
4	800.0	0.0808	B-1
4	790.0	0.0798	B-1
4	780.0	0.077	B-1
4	770.0	0.0746	B-1
4	750.0	0.07	B-1
4	740.0	0.0672	B-1
4	730.0	0.0648	B-1
4	720.0	0.062	B-1
4	710.0	0.06	B-1
4	700.0	0.0571	B-1
4	690.0	0.0551	B-1
4	680.0	0.0532	B-1
4	670.0	0.0524	B-1
4	660.0	0.0518	B-1
4	650.0	0.0515	B-1
4	460.0	0.3754	A-2
4	640.0	0.0516	B-1
4	850.0	0.0863	B-1
4	860.0	0.0877	B-1
4	760.0	0.0726	B-1
4	880.0	0.0884	B-1
4	440.0	0.3636	A-2
4	870.0	0.0878	B-1
4	420.0	0.3582	A-2
4	410.0	0.3543	A-2
4	400.0	0.3534	A-2
4	390.0	0.3715	A-2
4	380.0	0.4276	A-2
4	370.0	0.5383	A-2
4	360.0	0.619	A-2
4	350.0	0.6498	A-2
4	340.0	0.6974	A-2
4	430.0	0.3598	A-2
4	320.0	0.9641	A-2
4	330.0	0.7823	A-2
4	900.0	0.0896	B-1
4	910.0	0.0903	B-1
4	920.0	0.0904	B-1
4	930.0	0.0908	B-1
4	890.0	0.0889	B-1
4	950.0	0.0917	B-1
4	300.0	2.0603	A-2
4	310.0	1.3595	A-2
4	940.0	0.0916	B-1
5	930.0	0.1034	B-2
5	340.0	1.5206	A-3
5	330.0	1.55	A-3
5	320.0	1.6991	A-3
5	310.0	2.0804	A-3
5	300.0	2.7761	A-3
5	350.0	1.5499	A-3
5	950.0	0.1048	B-2
5	940.0	0.1038	B-2
5	920.0	0.1023	B-2
5	870.0	0.0995	B-2
5	900.0	0.1007	B-2
5	890.0	0.1005	B-2
5	880.0	0.1002	B-2
5	860.0	0.0988	B-2
5	850.0	0.098	B-2
5	840.0	0.0973	B-2
5	830.0	0.0961	B-2
5	820.0	0.0957	B-2
5	360.0	1.5609	A-3
5	910.0	0.1016	B-2
5	370.0	1.4855	A-3
5	610.0	1.9872	A-3
5	390.0	1.2649	A-3
5	600.0	1.9893	A-3
5	590.0	1.9976	A-3
5	580.0	2.0162	A-3
5	570.0	2.0276	A-3
5	560.0	1.9851	A-3
5	550.0	1.9285	A-3
5	540.0	1.8696	A-3
5	530.0	1.7962	A-3
5	520.0	1.7316	A-3
5	510.0	1.6576	A-3
5	500.0	1.5313	A-3
5	490.0	1.4602	A-3
5	480.0	1.4168	A-3
5	470.0	1.3598	A-3
5	460.0	1.3179	A-3
5	450.0	1.3032	A-3
5	440.0	1.2773	A-3
5	430.0	1.2735	A-3
5	420.0	1.2767	A-3
5	410.0	1.2591	A-3
5	400.0	1.244	A-3
5	380.0	1.3529	A-3
5	810.0	0.094	B-2
5	330.0	1.001	B-2
5	790.0	0.0898	B-2
5	530.0	0.7243	B-2
5	520.0	0.7113	B-2
5	510.0	0.7336	B-2
5	500.0	0.6826	B-2
5	490.0	0.676	B-2
5	480.0	0.6898	B-2
5	470.0	0.6755	B-2
5	460.0	0.6549	B-2
5	450.0	0.6442	B-2
5	440.0	0.6408	B-2
5	430.0	0.6484	B-2
5	420.0	0.6385	B-2
5	410.0	0.6306	B-2
5	400.0	0.6144	B-2
5	390.0	0.6205	B-2
5	380.0	0.6666	B-2
5	370.0	0.7601	B-2
5	360.0	0.8285	B-2
5	350.0	0.907	B-2
5	340.0	0.9182	B-2
5	620.0	1.9658	A-3
5	540.0	0.7223	B-2
5	800.0	0.0917	B-2
5	550.0	0.7254	B-2
5	570.0	0.7322	B-2
5	780.0	0.0876	B-2
5	770.0	0.0853	B-2
5	760.0	0.0846	B-2
5	750.0	0.0849	B-2
5	740.0	0.0855	B-2
5	730.0	0.0888	B-2
5	720.0	0.0938	B-2
5	710.0	0.1011	B-2
5	700.0	0.1141	B-2
5	690.0	0.1416	B-2
5	680.0	0.1908	B-2
5	670.0	0.3018	B-2
5	660.0	0.4534	B-2
5	650.0	0.5921	B-2
5	640.0	0.6897	B-2
5	630.0	0.7196	B-2
5	620.0	0.7212	B-2
5	610.0	0.7381	B-2
5	600.0	0.7238	B-2
5	590.0	0.7238	B-2
5	580.0	0.7228	B-2
5	560.0	0.7415	B-2
5	630.0	1.8789	A-3
5	470.0	1.1487	B-3
5	650.0	1.2362	A-3
5	710.0	0.0669	B-3
5	700.0	0.0917	B-3
5	690.0	0.1479	B-3
5	680.0	0.237	B-3
5	670.0	0.3894	B-3
5	660.0	0.6074	B-3
5	650.0	0.9895	B-3
5	640.0	1.5888	B-3
5	630.0	2.1024	B-3
5	620.0	2.4138	B-3
5	610.0	2.4855	B-3
5	600.0	2.4614	B-3
5	590.0	2.4842	B-3
5	580.0	2.5518	B-3
5	570.0	2.5636	B-3
5	560.0	2.4681	B-3
5	550.0	2.2834	B-3
5	540.0	2.0933	B-3
5	530.0	1.9083	B-3
5	520.0	1.7403	B-3
5	510.0	1.5644	B-3
5	720.0	0.0603	B-3
5	500.0	1.4042	B-3
5	730.0	0.0638	B-3
5	750.0	0.081	B-3
5	320.0	1.1659	B-2
5	950.0	0.1259	B-3
5	940.0	0.1236	B-3
5	930.0	0.1216	B-3
5	920.0	0.1196	B-3
5	910.0	0.1188	B-3
5	900.0	0.1176	B-3
5	890.0	0.117	B-3
5	880.0	0.1166	B-3
5	870.0	0.1166	B-3
5	860.0	0.1173	B-3
5	850.0	0.1178	B-3
5	840.0	0.1178	B-3
5	830.0	0.1181	B-3
5	820.0	0.1179	B-3
5	810.0	0.1165	B-3
5	800.0	0.1144	B-3
5	790.0	0.1113	B-3
5	780.0	0.1058	B-3
5	770.0	0.0986	B-3
5	760.0	0.0906	B-3
5	740.0	0.0715	B-3
5	640.0	1.6462	A-3
5	490.0	1.286	B-3
5	460.0	1.1088	B-3
5	860.0	0.0976	A-3
5	850.0	0.0977	A-3
5	840.0	0.0975	A-3
5	830.0	0.0979	A-3
5	820.0	0.0986	A-3
5	810.0	0.0996	A-3
5	800.0	0.1002	A-3
5	790.0	0.1	A-3
5	780.0	0.0995	A-3
5	770.0	0.0975	A-3
5	760.0	0.0965	A-3
5	750.0	0.096	A-3
5	740.0	0.0973	A-3
5	730.0	0.101	A-3
5	720.0	0.1077	A-3
5	710.0	0.1181	A-3
5	700.0	0.137	A-3
5	690.0	0.1845	A-3
5	680.0	0.2828	A-3
5	670.0	0.4959	A-3
5	660.0	0.814	A-3
5	870.0	0.0981	A-3
5	480.0	1.2107	B-3
5	880.0	0.0989	A-3
5	900.0	0.1011	A-3
5	450.0	1.0714	B-3
5	440.0	1.0586	B-3
5	430.0	1.0534	B-3
5	420.0	1.0546	B-3
5	410.0	1.0371	B-3
5	400.0	1.0161	B-3
5	390.0	1.0469	B-3
5	380.0	1.1617	B-3
5	370.0	1.3345	B-3
5	360.0	1.4208	B-3
5	350.0	1.3855	B-3
5	340.0	1.331	B-3
5	330.0	1.3442	B-3
5	320.0	1.4978	B-3
5	310.0	1.8978	B-3
5	300.0	2.6505	B-3
5	950.0	0.1092	A-3
5	940.0	0.1075	A-3
5	930.0	0.1054	A-3
5	920.0	0.1036	A-3
5	910.0	0.1025	A-3
5	890.0	0.1	A-3
5	310.0	1.5337	B-2
5	950.0	0.0903	A-2
5	800.0	0.0759	A-1
5	350.0	0.2569	B-1
5	340.0	0.3095	B-1
5	330.0	0.3984	B-1
5	320.0	0.5786	B-1
5	310.0	0.9526	B-1
5	300.0	1.6253	B-1
5	950.0	0.0897	A-1
5	940.0	0.0896	A-1
5	930.0	0.0887	A-1
5	920.0	0.0883	A-1
5	910.0	0.0879	A-1
5	900.0	0.0872	A-1
5	890.0	0.0865	A-1
5	880.0	0.0858	A-1
5	870.0	0.0848	A-1
5	860.0	0.0843	A-1
5	850.0	0.0831	A-1
5	840.0	0.0816	A-1
5	830.0	0.0803	A-1
5	820.0	0.0793	A-1
5	810.0	0.0777	A-1
5	360.0	0.2237	B-1
5	790.0	0.0741	A-1
5	370.0	0.1553	B-1
5	390.0	0.0601	B-1
5	600.0	0.0492	B-1
5	590.0	0.0511	B-1
5	580.0	0.0537	B-1
5	570.0	0.0568	B-1
5	560.0	0.0605	B-1
5	550.0	0.0648	B-1
5	540.0	0.0687	B-1
5	530.0	0.0735	B-1
5	520.0	0.0777	B-1
5	510.0	0.0823	B-1
5	500.0	0.08	B-1
5	490.0	0.0899	B-1
5	480.0	0.0921	B-1
5	470.0	0.0931	B-1
5	460.0	0.093	B-1
5	450.0	0.0826	B-1
5	440.0	0.0874	B-1
5	430.0	0.0815	B-1
5	420.0	0.0747	B-1
5	410.0	0.0661	B-1
5	400.0	0.06	B-1
5	380.0	0.0797	B-1
5	610.0	0.0476	B-1
5	780.0	0.0721	A-1
5	760.0	0.068	A-1
5	500.0	0.0804	A-1
5	490.0	0.0902	A-1
5	480.0	0.0925	A-1
5	470.0	0.0936	A-1
5	460.0	0.0935	A-1
5	450.0	0.0831	A-1
5	440.0	0.088	A-1
5	430.0	0.0821	A-1
5	420.0	0.0754	A-1
5	410.0	0.0668	A-1
5	400.0	0.0606	A-1
5	390.0	0.0607	A-1
5	380.0	0.081	A-1
5	370.0	0.1582	A-1
5	360.0	0.2243	A-1
5	350.0	0.2576	A-1
5	340.0	0.3099	A-1
5	330.0	0.3989	A-1
5	320.0	0.5805	A-1
5	310.0	0.9518	A-1
5	300.0	2.2253	B-2
5	510.0	0.0827	A-1
5	770.0	0.0699	A-1
5	520.0	0.0781	A-1
5	540.0	0.0691	A-1
5	750.0	0.0658	A-1
5	740.0	0.0636	A-1
5	730.0	0.0613	A-1
5	720.0	0.0584	A-1
5	710.0	0.056	A-1
5	700.0	0.0536	A-1
5	690.0	0.0512	A-1
5	680.0	0.0493	A-1
5	670.0	0.0477	A-1
5	660.0	0.0469	A-1
5	650.0	0.0462	A-1
5	640.0	0.0459	A-1
5	630.0	0.0462	A-1
5	620.0	0.0468	A-1
5	610.0	0.0479	A-1
5	600.0	0.0495	A-1
5	590.0	0.0514	A-1
5	580.0	0.0541	A-1
5	570.0	0.0573	A-1
5	560.0	0.0608	A-1
5	550.0	0.065	A-1
5	530.0	0.0739	A-1
5	620.0	0.0464	B-1
5	300.0	1.632	A-1
5	640.0	0.0456	B-1
5	690.0	0.0552	A-2
5	680.0	0.0549	A-2
5	670.0	0.0566	A-2
5	660.0	0.0592	A-2
5	650.0	0.0626	A-2
5	640.0	0.0644	A-2
5	630.0	0.0669	A-2
5	620.0	0.067	A-2
5	610.0	0.0691	A-2
5	600.0	0.0697	A-2
5	590.0	0.0722	A-2
5	580.0	0.0747	A-2
5	570.0	0.0786	A-2
5	560.0	0.0813	A-2
5	550.0	0.0852	A-2
5	540.0	0.0883	A-2
5	530.0	0.0936	A-2
5	520.0	0.0972	A-2
5	510.0	0.1026	A-2
5	500.0	0.0977	A-2
5	490.0	0.1075	A-2
5	700.0	0.0558	A-2
5	480.0	0.1097	A-2
5	710.0	0.0577	A-2
5	730.0	0.0619	A-2
5	630.0	0.0458	B-1
5	930.0	0.0892	A-2
5	920.0	0.0884	A-2
5	910.0	0.0882	A-2
5	900.0	0.0875	A-2
5	890.0	0.0867	A-2
5	880.0	0.086	A-2
5	870.0	0.0849	A-2
5	860.0	0.0844	A-2
5	850.0	0.083	A-2
5	840.0	0.0813	A-2
5	830.0	0.0802	A-2
5	820.0	0.0792	A-2
5	810.0	0.0774	A-2
5	800.0	0.0758	A-2
5	790.0	0.074	A-2
5	780.0	0.0723	A-2
5	770.0	0.0698	A-2
5	760.0	0.0682	A-2
5	750.0	0.0661	A-2
5	740.0	0.064	A-2
5	720.0	0.0597	A-2
5	470.0	0.1094	A-2
5	940.0	0.0895	A-2
5	450.0	0.0976	A-2
5	850.0	0.0824	B-1
5	840.0	0.0807	B-1
5	830.0	0.0796	B-1
5	820.0	0.0785	B-1
5	810.0	0.0769	B-1
5	800.0	0.0751	B-1
5	790.0	0.0734	B-1
5	780.0	0.0715	B-1
5	770.0	0.0693	B-1
5	760.0	0.0674	B-1
5	750.0	0.0651	B-1
5	740.0	0.063	B-1
5	730.0	0.0606	B-1
5	720.0	0.0579	B-1
5	710.0	0.0555	B-1
5	700.0	0.0532	B-1
5	690.0	0.0507	B-1
5	680.0	0.0489	B-1
5	670.0	0.0474	B-1
5	660.0	0.0465	B-1
5	460.0	0.1078	A-2
5	860.0	0.0838	B-1
5	870.0	0.0841	B-1
5	650.0	0.0459	B-1
5	890.0	0.0858	B-1
5	440.0	0.1011	A-2
5	430.0	0.0954	A-2
5	420.0	0.0874	A-2
5	410.0	0.0788	A-2
5	400.0	0.0718	A-2
5	390.0	0.0728	A-2
5	880.0	0.0851	B-1
5	370.0	0.1747	A-2
5	360.0	0.2394	A-2
5	350.0	0.2741	A-2
5	380.0	0.0939	A-2
5	330.0	0.4111	A-2
5	340.0	0.3248	A-2
5	910.0	0.0873	B-1
5	920.0	0.0876	B-1
5	930.0	0.0882	B-1
5	900.0	0.0866	B-1
5	950.0	0.0889	B-1
5	300.0	1.6407	A-2
5	310.0	0.9612	A-2
5	320.0	0.5943	A-2
5	940.0	0.0886	B-1
6	360.0	0.5384	A-3
6	350.0	0.573	A-3
6	340.0	0.6312	A-3
6	330.0	0.7319	A-3
6	320.0	0.9454	A-3
6	310.0	1.3589	A-3
6	300.0	2.0761	A-3
6	950.0	0.1648	B-2
6	940.0	0.1653	B-2
6	830.0	0.3243	B-2
6	920.0	0.1707	B-2
6	910.0	0.1765	B-2
6	900.0	0.1851	B-2
6	890.0	0.1981	B-2
6	880.0	0.2138	B-2
6	870.0	0.2384	B-2
6	860.0	0.2662	B-2
6	850.0	0.2929	B-2
6	840.0	0.3142	B-2
[truncated: 45,125 more rows]
