# Supplementary material for: Autonomous optimization of an organic solar cell in a 4-dimensional parameter space
Source: Royal Society of Chemistry journal article supplement (doi:10.1039/d3ee02027d), 2023-01-01
Supplement: d3ee02027d2.csv [file d3ee02027d2.csv]

SampleNr	cell	lightIntensity	Voltage [V]	Current [mA/cm2]
1	A-3	0.0	1.200001	1203.6525
1	A-2	1.0	1.172149	665.76625
1	A-3	1.0	-0.944301	-897.7250000000001
1	A-1	1.0	-0.97215	-6.0994
1	B-3	1.0	-0.860761	-6.418562500000001
1	B-2	1.0	1.032909	6.4188625
1	B-1	1.0	-1.000002	-6.694125
1	B-2	0.0	-0.749369	-0.0004299125
1	B-1	0.0	1.2	25.856749999999995
1	B-3	0.0	0.0311522	0.0001212075
1	A-2	0.0	-0.777221	-440.98124999999993
1	A-1	0.0	-1.000001	-0.00247755
2	B-2	1.0	0.1417718	-0.7551125
2	A-2	1.0	1.172149	736.575
2	A-3	1.0	-0.9443	-870.5375
2	A-1	1.0	-0.972148	-2.435825
2	B-3	1.0	-0.999999	-895.075
2	B-1	1.0	-1.000003	-2.4879625
2	B-1	0.0	-0.972148	-0.0012409374999999
2	B-2	0.0	-0.749371	-0.0018388499999999
2	B-3	0.0	0.0302903	26.780875
2	A-2	0.0	-0.777222	-465.25999999999993
2	A-3	0.0	1.200002	1188.685
2	A-1	0.0	-1.000003	-0.0036250749999999
3	A-2	1.0	1.144299	570.3299999999999
3	A-3	1.0	-0.972149	-472.3575
3	A-1	1.0	-1.000001	-469.28625
3	B-1	1.0	-0.999999	-457.33125
3	B-3	1.0	1.200001	791.805
3	B-2	1.0	1.005062	484.06875
3	B-2	0.0	0.1139225	27.985125
3	B-1	0.0	-1.0	-438.96125
3	B-3	0.0	0.0303797	5.9424375
3	A-3	0.0	1.199998	802.4825
3	A-2	0.0	-0.805056	-287.82125
3	A-1	0.0	-1.0	-495.50125
4	B-2	1.0	0.1417758	-19.436625
4	A-2	1.0	1.17215	136.05125
4	A-3	1.0	-0.944297	-23.004375
4	A-1	1.0	-0.999999	-22.361375
4	B-3	1.0	-0.999999	-603.8924999999999
4	B-1	1.0	-1.000001	-722.9875
4	A-1	0.0	-1.0	-0.907725
4	A-2	0.0	0.1139249	0.0021008249999999
4	A-3	0.0	1.199999	191.92875
4	B-1	0.0	-0.999999	-700.8125
4	B-2	0.0	-0.749372	-1.3076
4	B-3	0.0	0.0582282	34.287375
5	B-3	1.0	1.200001	0.13859125
5	A-2	1.0	1.144299	749.1962500000001
5	A-3	1.0	-0.972151	-784.7125
5	A-1	1.0	-1.000002	-885.6374999999999
5	B-1	1.0	-1.0	-866.9
5	B-2	1.0	1.005061	535.255
5	B-2	0.0	0.1139241	50.67662500000001
5	A-1	0.0	-0.999999	-908.2625
5	B-1	0.0	-1.0	-857.0375
5	B-3	0.0	0.0307631	0.0001040074999999
5	A-3	0.0	1.199999	1077.8125
5	A-2	0.0	-0.805061	-512.56625
6	A-3	1.0	-0.9443	-26.27975
6	A-1	1.0	-0.972149	-14.051750000000002
6	B-2	1.0	0.1139241	-9.6795
6	B-1	1.0	-0.999999	-16.4905
6	B-3	1.0	-1.000006	-18.2085
6	A-2	1.0	1.1443	165.7975
6	A-2	0.0	0.1139234	1.7948625000000002
6	B-1	0.0	-0.999992	-6.578625000000001
6	B-2	0.0	-0.777217	-2.0898375
6	B-3	0.0	0.0303782	0.0483812499999999
6	A-3	0.0	1.199999	298.0925
6	A-1	0.0	-1.000002	-4.113712499999999
7	A-1	1.0	-1.000011	-25.25875
7	A-3	1.0	1.199994	67.53337499999999
7	A-2	1.0	0.977226	11.328675
7	B-3	1.0	1.2	62.5565
7	B-1	1.0	-0.999997	-19.79575
7	B-2	1.0	0.1139251	-8.791
7	B-1	0.0	-0.999998	-9.47725
7	B-2	0.0	-0.777218	-3.62745
7	B-3	0.0	0.0303745	0.090915875
7	A-3	0.0	1.200009	66.996125
7	A-2	0.0	-0.72152	-4.939724999999999
7	A-1	0.0	-1.000006	-7.401874999999999
8	B-2	1.0	0.1696203	-3.9278125
8	A-2	1.0	1.11645	59.900125
8	A-3	1.0	-1.000001	-9.159249999999998
8	A-1	1.0	-0.972156	-12.614875
8	B-1	1.0	0.61519	-2.36055
8	B-3	1.0	-1.000003	-9.88975
8	B-3	0.0	0.0303763	0.03936525
8	B-1	0.0	1.1443	91.517375
8	B-2	0.0	-0.749389	-0.3844999999999999
8	A-1	0.0	0.615189	5.124775
8	A-2	0.0	-0.777223	-15.6855
8	A-3	0.0	0.0303797	0.05209525
9	A-3	1.0	-0.972149	-19.813125
9	A-1	1.0	0.67089	-13.888625
9	B-3	1.0	1.144298	115.425875
9	B-2	1.0	0.1139242	-16.806375
9	B-1	1.0	-0.999999	-19.307625
9	A-2	1.0	1.1443	89.01162500000001
9	B-2	0.0	0.1139241	0.0008721374999999
9	B-1	0.0	1.200001	132.7075
9	B-3	0.0	0.36456	0.0025967875
9	A-3	0.0	1.199998	143.09875
9	A-2	0.0	-0.77722	-0.013656125
9	A-1	0.0	-1.0	-0.008946625
10	A-2	1.0	1.172148	6.423025
10	A-3	1.0	-0.944299	-3.4814375
10	A-1	1.0	-1.000001	-3.9578625
10	B-1	1.0	-1.0	-3.5991625
10	B-3	1.0	-0.860762	-3.3077875
10	B-2	1.0	1.032911	6.16975
10	A-1	0.0	-1.0	-0.061019
10	B-2	0.0	-0.749372	-2.64995
10	B-3	0.0	0.0316989	0.0002094037499999
10	A-2	0.0	0.1417725	0.000732175
10	A-3	0.0	0.0303855	0.00018915
10	B-1	0.0	1.144301	2.7648625
11	B-2	1.0	0.1417716	7.920375
11	A-3	1.0	-0.944299	-12.438124999999998
11	B-1	1.0	-1.000003	-17.325000000000003
11	A-1	1.0	-0.999998	-18.469875
11	B-3	1.0	-0.832913	-12.403625
11	A-2	1.0	1.17215	160.63500000000002
11	B-2	0.0	0.1417726	10.211875
11	A-3	0.0	1.2	224.48625
11	A-2	0.0	-0.77722	-11.676125
11	A-1	0.0	-1.000002	-15.439375
11	B-1	0.0	1.11646	148.65625
11	B-3	0.0	0.0303796	0.125429625
12	A-2	1.0	1.116459	133.69875
12	A-3	1.0	-0.999998	-19.725625
12	A-1	1.0	-0.1924056	-14.564750000000002
12	B-2	1.0	0.1139211	-14.37475
12	B-1	1.0	-1.000001	-16.815125
12	B-3	1.0	1.172151	226.29875
12	B-1	0.0	0.615224	0.84546
12	A-3	0.0	1.2	245.09125000000003
12	B-2	0.0	-0.749371	-3.2561624999999994
12	B-3	0.0	0.0025442	0.0001213624999999
12	A-2	0.0	0.0860767	0.049884625
12	A-1	0.0	-1.000002	-0.09849875
13	A-2	1.0	1.144297	617.1812500000001
13	A-3	1.0	-0.944302	-863.3625000000001
13	A-1	1.0	0.698729	-8.996875
13	B-1	1.0	-1.000001	-14.347499999999998
13	B-2	1.0	0.1417722	-12.4155
13	B-3	1.0	-0.999999	-14.307375
13	A-2	0.0	1.17215	636.56375
13	A-1	0.0	-0.972147	-0.0322037499999999
13	B-1	0.0	-1.000002	-0.054261125
13	B-2	0.0	0.086077	0.061798125
13	B-3	0.0	-1.000001	-0.0216235
13	A-3	0.0	-0.9443	-863.7624999999999
14	A-2	1.0	1.1443	0.7728575000000001
14	A-3	1.0	-0.944302	-1.7531249999999998
14	A-1	1.0	0.69873	-0.297915
14	B-1	1.0	-0.999999	-592.66125
14	B-3	1.0	-0.860761	-1.6283249999999998
14	B-2	1.0	1.032911	0.127534875
14	A-1	0.0	-1.000001	-0.007858375
14	B-2	0.0	-0.77722	-0.010078875
14	B-3	0.0	0.0303768	0.00032074125
14	A-2	0.0	0.1139216	0.001207575
14	A-3	0.0	1.200005	0.30494625
14	B-1	0.0	1.116458	677.1737499999999
15	B-2	1.0	0.1417707	-19.8415
15	A-2	1.0	1.172149	170.53125
15	A-3	1.0	-0.944302	-22.48125
15	A-1	1.0	0.726579	-16.73925
15	B-3	1.0	-0.832908	-20.878125
15	B-1	1.0	-0.999998	-29.00125
15	B-1	0.0	-0.9443	-7.404374999999999
15	B-2	0.0	-0.749369	-0.17295
15	A-1	0.0	-1.000003	-0.3439149999999999
15	B-3	0.0	0.0303869	0.004235575
15	A-2	0.0	-0.749373	-1.4946625
15	A-3	0.0	0.0303783	0.0310704999999999
16	A-3	1.0	-0.9443	-926.125
16	A-1	1.0	0.698731	-3.4351
16	B-1	1.0	-0.999999	-11.18025
16	B-3	1.0	1.200001	1261.20875
16	B-2	1.0	1.032878	1.19032125
16	A-2	1.0	1.144299	494.62375
16	B-1	0.0	1.1443	3.6386375
16	B-2	0.0	-0.749367	-0.0050927499999999
16	B-3	0.0	0.0582278	56.03925
16	A-2	0.0	0.1696197	72.90775000000001
16	A-3	0.0	-0.0253164	-25.030875
16	A-1	0.0	-0.97215	-0.008962625
17	A-2	1.0	1.144295	186.68125
17	A-3	1.0	-0.944299	-112.6475
17	A-1	1.0	-1.0	-123.63
17	B-3	1.0	1.200001	268.04375
17	B-1	1.0	-0.999999	-23.761375
17	B-2	1.0	1.00506	90.7815
17	B-3	0.0	1.199999	263.92
17	B-1	0.0	-0.999999	-12.6665
17	B-2	0.0	-0.777221	-11.95325
17	A-3	0.0	1.2	321.57625
17	A-2	0.0	0.1139242	3.1644
17	A-1	0.0	-0.999997	-115.37
18	B-1	1.0	-0.999999	-820.0374999999999
18	A-3	1.0	-0.999999	-1.7818125
18	A-1	1.0	0.670889	580.30625
18	B-2	1.0	0.058225	-0.870975
18	B-3	1.0	-1.0	-1.8691875
18	A-2	1.0	1.116459	513.51125
18	B-3	0.0	1.172149	0.97820125
18	A-2	0.0	-0.832912	-357.76875
18	A-1	0.0	-1.0	-863.0374999999999
18	A-3	0.0	1.200001	1.846275
18	B-2	0.0	-0.805057	-0.0051963875
18	B-1	0.0	1.2	1037.60875
19	A-2	1.0	1.144301	148.03374999999997
19	A-3	1.0	-0.9443	-15.4685
19	A-1	1.0	-1.000001	-22.599875
19	B-1	1.0	-1.000002	-18.812625
19	B-3	1.0	-1.000001	-23.633125
19	B-2	1.0	0.1417743	-12.751124999999998
19	B-1	0.0	-0.944295	-4.0257125
19	B-2	0.0	-0.721517	-0.9321125
19	B-3	0.0	0.0582249	0.2236975
19	A-3	0.0	1.172148	206.305
19	A-2	0.0	0.1139232	0.229675
19	A-1	0.0	-1.000004	-7.429125
20	A-2	1.0	1.116459	78.12424999999999
20	A-3	1.0	-0.97215	-18.71
20	A-1	1.0	-1.0	-667.45
20	B-1	1.0	-1.0	-19.104875
20	B-2	1.0	0.1139263	-16.899625
20	B-3	1.0	-1.0	-19.04225
20	A-3	0.0	1.172148	129.55887499999997
20	B-2	0.0	-0.749369	-0.009249625
20	B-3	0.0	0.0582277	0.000961975
20	A-1	0.0	-0.999999	-681.4749999999999
20	A-2	0.0	0.1137672	0.0034831
20	B-1	0.0	-0.97215	-0.012041625
21	A-2	1.0	1.116459	115.259
21	A-3	1.0	-0.972151	-567.4787500000001
21	A-1	1.0	0.643039	-17.476
21	B-3	1.0	1.172149	1187.89
21	B-2	1.0	0.1139195	-19.7045
21	B-1	1.0	-1.0	-21.5315
21	B-2	0.0	0.0860784	0.111271125
21	A-1	0.0	-0.999998	-0.7957749999999999
21	B-3	0.0	0.0302927	26.683875
21	A-3	0.0	1.199997	721.39625
21	A-2	0.0	0.1139148	0.0037244375
21	B-1	0.0	-0.999997	-0.02681475
22	B-1	1.0	-1.0	-80.04625
22	A-3	1.0	-0.972152	-244.24
22	A-1	1.0	-0.999999	-44.43275
22	B-3	1.0	1.199999	339.525
22	B-2	1.0	0.1139244	7.344875000000001
22	A-2	1.0	1.144312	207.31375
22	B-1	0.0	-0.972151	-69.55624999999999
22	A-3	0.0	1.2	334.1325
22	A-2	0.0	0.1139236	12.5432
22	A-1	0.0	-0.999999	-41.156375
22	B-2	0.0	-0.749371	-73.71125
22	B-3	0.0	0.0582188	0.96624625
23	A-2	1.0	1.116459	313.56875
23	A-3	1.0	-0.972148	-285.3525
23	A-1	1.0	0.643039	159.815
23	B-3	1.0	1.199999	373.265
23	B-1	1.0	-1.0	-288.53375000000005
23	B-2	1.0	0.1139237	5.223387499999999
23	A-1	0.0	-1.0	-241.64
23	B-1	0.0	-0.999999	-281.81
23	B-3	0.0	0.0303797	1.3774625
23	A-3	0.0	1.200001	443.58875
23	A-2	0.0	-0.805059	-106.48125
23	B-2	0.0	0.0860771	4.322274999999999
24	A-2	1.0	1.116459	78.314875
24	A-3	1.0	-0.972149	-9.35125
24	A-1	1.0	0.670885	1.9696
24	B-1	1.0	-0.999987	-19.54825
24	B-2	1.0	0.1139236	-6.598625000000001
24	B-3	1.0	-0.498733	-8.325624999999999
24	B-1	0.0	-0.972152	-11.602375
24	A-3	0.0	1.2	155.11374999999998
24	A-2	0.0	0.113912	0.3528787499999999
24	A-1	0.0	-1.000001	-13.236874999999998
24	B-2	0.0	-0.749373	-2.0430125
24	B-3	0.0	0.0582288	0.054982375
25	A-2	1.0	1.144299	116.16125
25	A-3	1.0	-0.944299	-21.232375
25	A-1	1.0	-0.1645575	-20.905875
25	B-2	1.0	0.0860754	-19.795625
25	B-3	1.0	-0.999999	-20.921375
25	B-1	1.0	-0.999998	-21.679125000000003
25	B-1	0.0	-0.972149	-0.0196305
25	B-2	0.0	-0.749372	-0.011907875
25	B-3	0.0	0.0303819	0.0002182625
25	A-2	0.0	0.1139258	0.0010887874999999
25	A-3	0.0	1.200001	179.1325
25	A-1	0.0	-1.0	-0.0168263749999999
26	A-2	1.0	1.11646	40.6305
26	A-3	1.0	-0.97215	-15.377375
26	A-1	1.0	0.643039	-6.97425
26	B-3	1.0	1.199999	83.8985
26	B-2	1.0	0.0860734	-12.566875
26	B-1	1.0	0.615189	-4.97215
26	A-1	0.0	-1.0	-0.0144143749999999
26	B-1	0.0	-1.000001	-4.480925
26	A-2	0.0	0.1139319	0.0020476875
26	B-2	0.0	0.0860818	0.111904875
26	B-3	0.0	0.0303806	0.0675676249999999
26	A-3	0.0	1.199999	75.955
27	A-2	1.0	1.1443	12.3562
27	A-3	1.0	-0.972151	-5.5954375
27	A-1	1.0	-0.972152	-5.8812625
27	B-1	1.0	-0.972151	-5.405525
27	A-2	0.0	1.17215	13.940875
27	B-2	1.0	0.1696206	-2.281775
27	A-1	0.0	0.75443	0.0131486249999999
27	B-1	0.0	-1.0	-0.0051954125
27	B-3	0.0	-0.805062	-0.013945875
27	B-2	0.0	1.08861	3.1751
27	A-3	0.0	-0.944302	-0.036372625
27	B-3	1.0	-1.0	-5.37555
28	B-3	1.0	-1.000003	-12.357125
28	A-2	1.0	1.1443	176.98749999999998
28	A-3	1.0	-0.944299	-11.7945
28	A-1	1.0	-1.000005	-27.796750000000003
28	B-1	1.0	-0.999999	-9.984125
28	B-2	1.0	0.1417717	0.8651625
28	A-1	0.0	-0.99999	-22.42
28	B-2	0.0	-0.749371	-46.917125
28	B-3	0.0	0.0303792	0.041199
28	A-2	0.0	-0.777225	-8.98525
28	A-3	0.0	-0.443041	-1.85595
28	B-1	0.0	-0.972149	-2.1915
29	B-2	1.0	-1.000007	-5.461425
29	B-1	1.0	1.08861	1.3750249999999995
29	B-3	1.0	1.11646	2.3445750000000003
29	A-3	1.0	1.17215	5.3747625
29	A-2	1.0	-0.860762	-3.4274
29	A-1	1.0	1.199999	7.005750000000001
29	A-3	0.0	1.2	6.324012499999999
29	B-1	0.0	1.1443	2.1276375
29	B-2	0.0	-0.749367	-0.0053718624999999
29	B-3	0.0	0.0303836	0.0002762874999999
29	A-2	0.0	-0.74937	-0.01197225
29	A-1	0.0	-0.97215	-0.009097125
30	B-1	1.0	-0.999999	-508.6875
30	A-2	1.0	1.116461	498.95875
30	A-3	1.0	-0.999998	-500.0625
30	A-1	1.0	0.67089	342.71000000000004
30	B-3	1.0	-1.0	-475.6024999999999
30	B-2	1.0	0.0582238	19.29225
30	B-3	0.0	1.2	654.7412499999999
30	A-2	0.0	-0.805056	-322.44125
30	B-2	0.0	-0.77722	-292.73375
30	A-3	0.0	1.1443	629.075
30	A-1	0.0	-1.0	-517.1737499999999
30	B-1	0.0	-1.000001	-500.24625
31	B-2	1.0	0.1139238	36.079125
31	A-3	0.0	1.199998	719.675
31	A-2	0.0	0.1139242	39.676875
31	B-3	0.0	0.0303799	10.4026375
31	B-2	0.0	-0.749371	-221.525
31	B-1	0.0	-0.972149	-459.5737499999999
31	A-1	0.0	-1.000001	-505.3525
31	B-3	1.0	-0.999998	-473.95875
31	B-1	1.0	-0.972151	-474.17750000000007
31	A-1	1.0	-1.0	-469.48500000000007
31	A-3	1.0	-0.972147	-447.1674999999999
31	A-2	1.0	1.11646	513.6362499999999
32	A-2	1.0	0.1417711	-0.909
32	B-3	1.0	-0.470891	-1.453025
32	A-3	1.0	1.200001	3.6971
32	B-2	1.0	-0.916459	-1.9214375
32	B-1	1.0	1.2	3.9613125
32	A-1	1.0	1.2	3.954125
32	B-1	0.0	1.200001	1.3843
32	B-3	0.0	1.200004	0.8032062499999999
32	A-3	0.0	1.199999	2.3373875
32	B-2	0.0	-0.805058	-0.0043143125
32	A-2	0.0	-0.805059	-0.01214025
32	A-1	0.0	-0.972151	-0.0078576249999999
33	B-3	1.0	-0.415188	-7.838375
33	A-2	1.0	1.172148	154.60875
33	A-3	1.0	-0.944309	-21.51025
33	A-1	1.0	-0.972147	-14.577374999999998
33	B-1	1.0	-0.999999	-12.67425
33	B-2	1.0	1.032908	94.9305
33	A-2	0.0	0.1417731	0.290155
33	B-1	0.0	-0.944301	-4.8931375
33	B-2	0.0	-0.721521	-3.65565
33	B-3	0.0	0.0582254	0.07400875
33	A-3	0.0	0.0303753	0.19422625
33	A-1	0.0	-1.000002	-7.8155
34	A-2	1.0	1.11646	159.87375
34	A-3	1.0	-0.972149	-13.545374999999998
34	A-1	1.0	0.1696182	-11.402
34	B-3	1.0	1.2	300.40375
34	B-1	1.0	-0.999999	-35.523
34	B-2	1.0	0.1139228	-11.45025
34	B-1	0.0	-0.97215	-22.82
34	B-2	0.0	-0.749369	-0.6233000000000001
34	B-3	0.0	0.0025242	0.00034891375
34	A-2	0.0	-0.777224	-0.2680275
34	A-3	0.0	1.199999	303.265
34	A-1	0.0	-1.000001	-0.7469625
35	A-3	1.0	1.200001	10.9036375
35	B-2	1.0	-0.91646	-6.454375
35	B-1	1.0	1.17215	7.919725
35	B-3	1.0	-0.44304	-5.2034875
35	A-1	1.0	-0.972151	-6.203049999999999
35	A-2	1.0	-0.805059	-5.8899
35	A-1	0.0	-1.0	-0.01000075
35	B-1	0.0	-0.97215	-0.0073443749999999
35	B-2	0.0	-0.749362	-0.37695
35	B-3	0.0	0.0303834	0.0121540625
35	A-2	0.0	-0.77722	-0.012594875
35	A-3	0.0	1.2	10.085175
36	A-3	1.0	-1.0	-12.260875
36	A-1	1.0	-0.972153	-12.260125
36	B-1	1.0	-1.000002	-12.89
36	B-2	1.0	0.1696207	-11.28275
36	B-3	1.0	-0.832912	-12.213125
36	A-2	1.0	1.088608	18.1315
36	A-2	0.0	1.06076	12.660574999999998
36	B-1	0.0	-0.972152	-0.461385
36	A-1	0.0	0.281013	0.00698725
36	B-3	0.0	-0.80506	-0.00372135
36	B-2	0.0	1.088609	17.038249999999998
36	A-3	0.0	-1.0	-0.0079405
37	A-3	1.0	-0.916461	-677.175
37	A-2	1.0	1.172148	147.86
37	A-1	1.0	-0.9443	-22.49525
37	B-1	1.0	-1.000001	-22.540875
37	B-2	1.0	0.1417718	-21.702
37	B-3	1.0	-1.000018	-29.078125000000004
37	A-1	0.0	-1.000001	-0.0087085
37	B-2	0.0	-0.749368	-0.0038181999999999
37	B-3	0.0	0.0582255	0.121096875
37	A-2	0.0	-0.74937	-0.0912525
37	A-3	0.0	1.199999	977.645
37	B-1	0.0	-0.972148	-0.0038629
38	A-2	1.0	1.005057	64.24125000000001
38	A-3	1.0	-0.999995	-55.50699999999999
38	B-3	1.0	-1.0	-17.68625
38	B-2	1.0	0.1417715	43.365
38	A-2	0.0	0.1417499	1.10961625
38	B-1	1.0	-1.0	-15.730875
38	A-1	0.0	-1.000001	-12.72175
38	B-1	0.0	-0.972148	-5.999725
38	B-2	0.0	-0.749371	-237.9
38	B-3	0.0	0.0303792	0.1556825
38	A-1	1.0	-0.972151	-17.52375
38	A-3	0.0	-0.387342	-14.756125
39	A-3	0.0	0.0303764	15.94475
39	B-3	0.0	0.0310716	0.0001893612499999
39	B-2	0.0	-0.749371	-0.00428905
39	B-1	0.0	1.144299	1070.05125
39	A-2	0.0	0.1139246	68.59962499999999
39	A-2	1.0	0.0860758	50.2515
39	A-3	1.0	1.2	787.185
39	A-1	1.0	-0.9443	-814.0375
39	B-3	1.0	-0.44304	-22.2205
39	B-1	1.0	1.2	1134.5825
39	B-2	1.0	-0.88861	-22.55775
39	A-1	0.0	-1.000001	-906.15
40	A-2	1.0	1.00506	85.829375
40	B-1	1.0	-0.999996	-23.40325
40	B-3	0.0	0.030383	0.0003066875
40	B-2	0.0	-0.749358	-0.06915125
40	B-1	0.0	-0.972152	-0.039161375
40	A-1	0.0	-1.000001	-0.018938125
40	A-2	0.0	0.0860808	0.001271225
40	B-2	1.0	1.06076	115.42150000000002
40	B-3	1.0	-0.832911	-23.70075
40	A-3	1.0	-0.999998	-23.26075
40	A-1	1.0	-0.999999	-23.183625
40	A-3	0.0	1.2	268.87
41	B-3	1.0	1.200208	5.541375e-05
41	A-1	1.0	-1.0	-20.2595
41	A-3	1.0	-0.88861	-20.912875
41	A-2	1.0	1.00506	75.12049999999999
41	B-1	1.0	-0.999998	-20.315625
41	B-2	1.0	0.1139236	-19.269625
41	B-2	0.0	-0.749359	-0.1284775
41	B-1	0.0	-1.000003	-0.0783799999999999
41	B-3	0.0	0.0305409	3.73125e-05
41	A-2	0.0	-0.777222	-0.024869
41	A-3	0.0	1.199999	252.635
41	A-1	0.0	-1.000002	-0.21799
42	B-2	1.0	0.977221	54.959875
42	A-3	1.0	1.2	213.10125
42	A-1	1.0	0.197469	-17.12575
42	B-1	1.0	-0.999998	-18.371
42	A-1	0.0	-0.999999	-2.6052250000000003
42	A-2	1.0	0.977219	57.4925
42	B-2	0.0	-0.74937	-0.55391625
42	B-1	0.0	-1.000005	-0.07891625
42	A-3	0.0	1.2	211.52875
42	B-3	1.0	1.2	132.91875
42	A-2	0.0	-0.77721	-0.20534375
42	B-3	0.0	0.0303788	0.001563425
43	B-3	1.0	1.2	137.12625
43	B-1	1.0	0.893668	310.18125
43	B-2	1.0	-0.999998	-251.25625
43	A-3	1.0	1.199999	130.145625
43	A-2	1.0	-0.888612	-7.711625
43	A-1	1.0	1.005063	36.127375
43	B-1	0.0	1.1443	400.1675
43	B-2	0.0	-0.749369	-183.9725
43	B-3	0.0	0.0303799	0.0730688749999999
43	A-2	0.0	-0.749371	-4.0736625
43	A-3	0.0	0.0303795	0.1894225
43	A-1	0.0	-0.916459	-6.602874999999999
44	B-2	1.0	0.0025323	-22.30125
44	A-3	1.0	1.088608	218.2125
44	B-3	1.0	1.200001	301.76
44	A-2	1.0	0.92152	56.994
44	A-1	1.0	0.1696225	-21.6015
44	B-1	1.0	0.1417753	-21.119375
44	A-1	0.0	0.61519	0.124797125
44	A-3	0.0	0.865819	44.27825
44	B-1	0.0	0.977219	109.942875
44	B-2	0.0	-0.74937	-0.0109736249999999
44	A-2	0.0	-0.77722	-0.0093125
44	B-3	0.0	1.144301	250.36625
45	A-2	1.0	0.1139245	-1.5242875
45	A-3	1.0	-1.000001	-3.0947624999999994
45	B-1	1.0	-1.000001	-3.50055
45	A-1	1.0	-0.1367087	-114.1575
45	B-2	1.0	0.1417724	-1.8237125
45	B-3	1.0	-1.000001	-3.351375
45	A-2	0.0	1.17215	1.926425
45	A-1	0.0	-0.972151	-834.5
45	B-1	0.0	-1.0	-0.0047848874999999
45	B-2	0.0	0.1151558	0.000527705
45	B-3	0.0	-0.999999	-0.00283645
45	A-3	0.0	-0.944297	-0.002848225
46	A-3	1.0	1.144299	33.829
46	A-2	1.0	0.921519	1.921125
46	A-1	1.0	0.1417728	-6.36
46	B-3	1.0	1.2	855.6650000000001
46	B-2	1.0	0.0860756	-6.0562125
46	B-1	1.0	0.61519	-3.073875
46	A-1	0.0	-0.972149	-0.0065767499999999
46	B-3	0.0	1.199999	841.82375
46	A-2	0.0	1.005061	7.979012499999999
46	A-3	0.0	-1.0	-0.0047643625
46	B-1	0.0	-1.0	-0.014378125
46	B-2	0.0	1.03291	10.0955125
47	B-3	1.0	1.199999	286.57125
47	A-1	1.0	-1.0	-13.464875
47	B-2	1.0	-0.777217	-12.412875
47	B-1	1.0	1.2	264.34375
47	A-3	1.0	1.200002	295.665
47	A-2	1.0	-0.80506	-12.165875000000002
47	B-1	0.0	1.03291	136.0775
47	B-2	0.0	-0.860794	-0.17141125
47	A-1	0.0	-0.999978	-0.5493275000000001
47	A-3	0.0	1.199998	294.91125
47	A-2	0.0	-0.832915	-0.1038224999999999
47	B-3	0.0	1.172149	259.36875000000003
48	B-3	0.0	1.17215	209.81375
48	B-1	1.0	-0.999999	-15.38775
48	A-1	1.0	-0.9443	-16.161749999999998
48	A-2	1.0	1.00506	65.710375
48	A-3	1.0	-1.000001	-15.32575
48	B-2	1.0	0.1417693	-14.118124999999996
48	A-2	0.0	1.00506	66.93950000000001
48	A-3	0.0	-0.888552	-0.50994125
48	A-1	0.0	-1.000003	-2.5976125
48	B-1	0.0	-1.000015	-0.06643875
48	B-2	0.0	0.977219	52.634375
48	B-3	1.0	-0.999998	-15.208124999999995
49	A-3	1.0	1.200001	0.8122175
49	B-3	1.0	0.336709	263.98125
49	A-1	1.0	-1.0	-1.1704375
49	B-2	1.0	-0.972148	-1.6115875000000002
49	B-1	1.0	1.116459	0.3199275
49	A-2	1.0	0.0582264	-0.6282249999999999
49	B-3	0.0	1.17215	933.57125
49	B-1	0.0	-0.610129	-0.0043579375
49	A-3	0.0	1.060757	0.0074346125
49	A-2	0.0	0.782283	0.006517825
49	B-2	0.0	1.005064	0.014977625
49	A-1	0.0	1.060763	0.0151272499999999
50	B-3	0.0	-0.805061	-0.00665525
50	A-2	1.0	0.0860776	-21.6995
50	B-1	1.0	-1.000004	-23.098125
50	A-3	1.0	-1.0	-22.528875
50	A-1	1.0	0.1974689	-21.651125
50	B-2	1.0	0.1417702	-21.869625
50	B-3	1.0	-1.0	-22.630625
50	A-2	0.0	1.172149	180.78125
50	A-3	0.0	-0.944299	-0.011965125
50	A-1	0.0	0.726579	1.3149125
50	B-1	0.0	-1.000002	-0.9959
50	B-2	0.0	0.113926	0.0008413874999999
51	A-2	1.0	0.0860738	-23.37525
51	A-3	1.0	-0.999997	-26.468
51	A-1	1.0	-0.1645564	-23.399375
51	B-3	1.0	1.200001	277.93125
51	B-1	1.0	-0.999999	-23.65375
51	B-2	1.0	0.1139254	-23.2965
51	A-2	0.0	0.0860676	0.002714075
51	A-1	0.0	-0.972151	-0.03289225
51	B-1	0.0	1.144302	213.985
51	B-2	0.0	-0.74937	-0.0095663749999999
51	B-3	0.0	0.0303832	0.0003864749999999
51	A-3	0.0	0.0303808	0.057588875
52	B-1	1.0	-0.91646	-21.867625
52	A-1	1.0	-0.91646	-24.39175
52	A-2	1.0	1.032909	105.036625
52	A-3	1.0	-1.000001	-22.008375
52	B-2	1.0	0.1417695	-21.316
52	B-3	1.0	-1.0	-29.796125
52	A-3	0.0	-0.97215	-0.0245978749999999
52	A-2	0.0	1.199998	197.6175
52	B-1	0.0	-0.972153	-0.2740899999999999
52	A-1	0.0	0.81013	12.921825
52	B-3	0.0	-0.805061	-5.8417125
52	B-2	0.0	1.08861	132.965
53	A-2	0.0	-0.805035	-0.14392625
53	B-3	0.0	0.0303808	0.0016560874999999
53	B-1	0.0	1.199999	252.2075
53	B-2	0.0	-0.74937	-0.6713625
53	A-1	0.0	-1.00002	-1.9925125
53	A-3	1.0	1.17215	249.7
53	B-1	1.0	-1.000001	-16.698125
53	B-2	1.0	0.0860723	-13.5925
53	A-1	1.0	0.1696213	-13.39225
53	A-2	1.0	0.94937	61.159625000000005
53	B-3	1.0	1.2	259.88125
53	A-3	0.0	1.2	271.0725
54	A-2	1.0	1.116458	120.108
54	A-3	1.0	-1.0	-10.728
54	A-1	1.0	-1.000002	-17.780625
54	B-2	1.0	0.0860748	-7.533999999999999
54	B-3	1.0	-1.000002	-10.242
54	B-1	1.0	0.587341	-5.8544
54	A-1	0.0	-0.999998	-10.616499999999998
54	B-3	0.0	1.172149	176.51
54	B-2	0.0	-0.74937	-1.6060249999999998
54	B-1	0.0	1.2	191.6275
54	A-2	0.0	-0.777219	-3.972475
54	A-3	0.0	1.200001	186.5
55	A-2	1.0	1.144299	164.53625
55	A-3	1.0	-0.944296	-22.73125
55	A-1	1.0	0.72658	-16.067125
55	B-1	1.0	-0.999999	-23.139
55	B-2	1.0	0.1417715	-22.76875
55	A-3	0.0	1.200001	281.9825
55	A-1	0.0	-1.000001	-0.043361125
55	B-1	0.0	1.11646	189.1625
55	B-2	0.0	-0.77722	-0.016098625
55	B-3	0.0	0.0025342	0.0002182875
55	A-2	0.0	-0.777219	-0.020710375
55	B-3	1.0	-0.832909	-23.1695
56	A-1	1.0	1.005059	124.223375
56	B-3	1.0	1.088611	198.52
56	B-2	1.0	-0.91646	-22.4165
56	A-3	1.0	1.2	295.66875
56	A-2	1.0	-0.88861	-24.017375
56	B-1	1.0	0.977219	104.0755
56	B-1	0.0	-0.972151	-0.8883375
56	B-2	0.0	-0.749369	-0.0178505
56	B-3	0.0	0.0582289	0.0014585499999999
56	A-1	0.0	-1.000003	-2.92145
56	A-2	0.0	0.1417722	0.19765375
56	A-3	0.0	1.200001	293.94375
57	A-3	1.0	-1.000008	-25.668875
57	A-2	1.0	1.08861	146.56625
57	B-1	1.0	-0.999998	-23.571875
57	A-1	1.0	0.726578	-15.274625
57	B-3	1.0	-0.860761	-30.184375
57	B-2	1.0	1.03291	114.4765
57	A-1	0.0	-0.972148	-0.28868
57	B-2	0.0	-0.721518	-0.73685
57	B-1	0.0	1.200001	283.04625
57	B-3	0.0	0.058228	0.3965337499999999
57	A-2	0.0	-0.749373	-0.29884
57	A-3	0.0	0.0303794	0.101183125
58	B-1	1.0	-0.972153	-24.792125
58	A-2	1.0	1.03291	122.964375
58	A-3	1.0	-1.000005	-22.096
58	A-1	1.0	-0.97215	-19.58675
58	B-2	1.0	0.1417715	-18.2515
58	B-3	1.0	-1.000001	-19.875125
58	B-2	0.0	-0.777228	-0.2365275
58	B-1	0.0	-1.0	-5.8049
58	B-3	0.0	0.0303849	0.0051157624999999
58	A-2	0.0	0.1417683	0.0062226875
58	A-3	0.0	1.2	332.2775
58	A-1	0.0	-1.00008	-0.2518974999999999
59	A-2	1.0	1.11646	2.0373
59	A-3	1.0	-0.999999	-2.1499
59	A-1	1.0	0.670889	-0.4270749999999999
59	B-2	1.0	0.0582283	30.79025
59	B-1	1.0	-1.000001	-954.0625
59	B-3	1.0	-1.000001	-2.15185
59	B-3	0.0	1.199999	6.9236625
59	B-1	0.0	1.116459	1154.5425
59	B-2	0.0	-0.777219	-383.795
59	A-2	0.0	-0.777216	-0.0048802625
59	A-3	0.0	1.199999	6.626762500000001
59	A-1	0.0	-1.000001	-0.0056443125
60	A-3	1.0	1.2	308.20625
60	B-3	1.0	1.200001	306.8575
60	A-2	1.0	0.0582281	-18.818125
60	B-2	1.0	-0.972152	-20.589625
60	B-1	1.0	1.116462	206.5275
60	A-1	1.0	1.2	275.65250000000003
60	A-1	0.0	-1.000031	-0.2697375
60	B-1	0.0	-0.944302	-1.9947375
60	B-2	0.0	-0.721517	-0.54557375
60	B-3	0.0	0.0582283	0.03108875
60	A-2	0.0	0.1139301	0.00548435
60	A-3	0.0	1.2	307.1
61	A-3	1.0	-0.972149	-22.3385
61	B-3	1.0	1.2	289.76875
61	A-1	1.0	0.1417688	-20.991625
61	B-2	1.0	0.1139201	-21.40775
61	B-1	1.0	-1.0	-22.519125
61	A-2	1.0	1.11646	148.25
61	B-1	0.0	-0.97215	-0.0604865
61	B-2	0.0	-0.749371	-0.0738425
61	B-3	0.0	0.0303794	0.0008382999999999
61	A-2	0.0	0.113923	0.0070877999999999
61	A-3	0.0	1.199999	289.18
61	A-1	0.0	-1.0	-0.06678125
62	B-2	1.0	1.199999	200.64875
62	B-3	1.0	-0.916458	-16.038625
62	B-1	1.0	-0.9443	-17.763499999999997
62	A-2	1.0	0.364557	-14.023249999999996
62	A-1	1.0	1.2	256.60125
62	A-3	1.0	0.0582249	-14.28225
62	A-1	0.0	-0.916475	-0.4108474999999999
62	A-2	0.0	1.060759	115.55612499999998
62	A-3	0.0	-0.999991	-0.23158875
62	B-3	0.0	-0.832899	-0.19074
62	B-2	0.0	1.060759	116.219
62	B-1	0.0	-0.944303	-3.043875
63	B-3	1.0	-0.805061	-21.871875
63	B-1	1.0	-0.944299	-22.164375
63	A-3	1.0	-0.80506	-22.843375
63	A-2	1.0	1.08861	159.23375
63	B-2	1.0	1.088611	161.48
63	A-1	1.0	-1.000001	-26.424750000000003
63	A-3	0.0	-0.832911	-1.7362875
63	B-2	0.0	1.032909	126.15612500000002
63	A-1	0.0	0.308837	1.013465
63	B-3	0.0	1.2	348.215
63	A-2	0.0	1.060761	141.71375
63	B-1	0.0	-0.972152	-0.1156
64	A-2	1.0	1.144299	150.145
64	A-3	1.0	-0.972152	-22.2405
64	A-1	1.0	-1.0	-804.2125
64	B-3	1.0	1.200001	975.015
64	B-2	1.0	1.00506	640.28375
64	B-1	1.0	-1.0	-899.5374999999999
64	A-3	0.0	-0.972148	-0.0071817625
64	A-1	0.0	-0.972152	-788.3499999999999
64	B-3	0.0	1.2	960.31625
64	B-2	0.0	0.0303649	17.479375
64	B-1	0.0	0.1696194	150.36125
64	A-2	0.0	1.08861	119.530375
65	A-2	1.0	1.172149	58.02437499999999
65	A-3	1.0	-0.916459	-14.058875
65	A-1	1.0	0.72658	-5.3233
65	B-1	1.0	-0.999998	-15.025250000000002
65	B-3	1.0	1.199999	83.95549999999999
65	B-2	1.0	1.032909	28.4635
65	B-3	0.0	1.199999	76.920375
65	B-2	0.0	-0.805059	-0.0043150875
65	B-1	0.0	1.199998	78.47025000000001
65	A-1	0.0	-1.0	-0.0072318749999999
65	A-2	0.0	-0.832909	-0.00771825
65	A-3	0.0	1.199998	79.94112499999999
66	A-2	1.0	1.116462	164.3875
66	A-3	1.0	-0.972151	-24.135
66	A-1	1.0	0.670888	-21.023375
66	B-3	1.0	1.172148	285.93375
66	B-2	1.0	0.0860755	-23.441
66	B-1	1.0	0.643039	-21.799125
66	A-3	0.0	1.2	309.9125
66	B-1	0.0	-0.97215	-0.0068105
66	B-2	0.0	-0.74937	-0.008275625
66	B-3	0.0	0.0582298	0.0008583625
66	A-2	0.0	0.1138897	0.003001975
66	A-1	0.0	-0.999999	-0.012953375
67	B-3	1.0	-0.83291	-20.108125
67	A-3	1.0	-0.9443	-19.995
67	A-1	1.0	-0.1645561	-19.531125
67	B-1	1.0	-1.000001	-20.438875
67	B-2	1.0	1.060758	83.447375
67	A-2	1.0	1.144299	121.3145
67	A-3	0.0	1.199999	206.3125
67	A-2	0.0	0.086079	0.0010275875
67	A-1	0.0	-0.999999	-0.00914875
67	B-3	0.0	1.17215	181.7675
67	B-2	0.0	-0.80506	-0.0037279749999999
67	B-1	0.0	1.199998	189.83
68	A-2	1.0	1.1443	536.05125
68	A-3	1.0	-0.944299	-925.525
68	A-1	1.0	0.670891	-3.5096625
68	B-3	1.0	1.172149	1008.33875
68	B-2	1.0	1.005059	545.5262500000001
68	B-1	1.0	-1.000002	-663.5375
68	A-1	0.0	-0.83291	-0.009394
68	A-2	0.0	-0.582281	-268.9075
68	B-2	0.0	-0.303802	-132.125
68	B-1	0.0	1.2	879.51125
68	A-3	0.0	-0.860759	-840.0999999999999
68	B-3	0.0	1.2	1017.10875
69	A-2	1.0	1.144299	527.95875
69	A-3	1.0	-0.944305	-20.248875
69	A-1	1.0	-0.999999	-624.2924999999999
69	B-1	1.0	-1.000001	-18.977625
69	B-3	1.0	-1.000001	-950.5875
69	B-2	1.0	0.1417719	-16.64925
69	B-1	0.0	-0.97215	-0.009049375
69	A-3	0.0	1.200002	82.269375
69	A-2	0.0	0.1139237	48.433625
69	A-1	0.0	-1.000001	-620.0724999999999
69	B-2	0.0	-0.74937	-0.00956525
69	B-3	0.0	0.058228	53.107125
70	A-2	1.0	0.0582288	-22.09125
70	A-3	1.0	-1.000001	-22.885375000000003
70	A-1	1.0	-0.1924034	-22.61375
70	B-3	1.0	1.172149	255.65375
70	B-1	1.0	-0.999999	-23.491
70	B-2	1.0	0.97722	73.26175
70	B-1	0.0	-0.97215	-0.059655
70	B-2	0.0	-0.74937	-0.02364275
70	A-1	0.0	-1.0	-0.0227592499999999
70	B-3	0.0	0.0303807	0.0004504249999999
70	A-3	0.0	1.2	280.58750000000003
70	A-2	0.0	0.0860793	0.002005875
71	A-2	1.0	1.172151	155.60750000000002
71	A-3	1.0	-0.944302	-24.70375
71	A-1	1.0	0.615189	25.56775
71	B-1	1.0	-0.999998	-25.237
71	B-3	1.0	-0.44304	-24.319375
71	B-2	1.0	1.005059	114.778
71	A-1	0.0	-0.97215	-0.00804925
71	B-2	0.0	-0.777221	-0.00882525
71	A-3	0.0	1.2	179.10125
71	B-1	0.0	1.116458	149.98875
71	B-3	0.0	0.0303779	0.0001099624999999
71	A-2	0.0	-0.749371	-0.008695125
72	B-2	1.0	-0.944299	-22.653375
72	B-1	1.0	1.172149	241.9375
72	B-3	1.0	1.200001	274.1625
72	A-3	1.0	1.200002	272.48
72	B-3	0.0	1.200001	269.62
72	A-2	1.0	0.0860762	-21.544
72	A-2	0.0	0.949371	59.596875
72	A-1	0.0	0.1694591	0.0029465125
72	B-1	0.0	-1.000003	-0.12595125
72	B-2	0.0	0.977219	71.93625
72	A-3	0.0	1.172149	247.55375
72	A-1	1.0	1.199999	258.93875
73	B-3	1.0	-1.0	-24.316625
73	A-2	1.0	1.17215	179.19125
73	A-3	1.0	-0.944301	-23.078625
73	A-1	1.0	0.698729	-18.137
73	B-1	1.0	-0.972151	-23.215375
73	B-2	1.0	0.1696207	-22.49925
73	A-2	0.0	1.200002	192.60375
73	A-1	0.0	0.782279	8.1883625
73	B-1	0.0	-1.0	-0.050467125
73	B-3	0.0	-0.83291	-0.8571375000000001
73	B-2	0.0	1.060759	120.953625
73	A-3	0.0	-0.916461	-0.0715612499999999
74	A-1	1.0	-0.972153	-17.524374999999996
74	A-3	1.0	1.200001	141.275
74	A-2	1.0	0.97722	32.456999999999994
74	B-3	1.0	1.2	141.31375
74	B-1	1.0	-1.0	-18.636
74	B-2	1.0	0.086078	-15.877624999999998
74	A-1	0.0	-0.972149	-0.018310125
74	B-1	0.0	1.199999	130.16325
74	B-3	0.0	0.0582293	2.3411375
74	A-2	0.0	0.169622	0.0021192
74	A-3	0.0	0.058229	0.0006359124999999
74	B-2	0.0	-0.721509	-0.21789875
75	B-1	1.0	-0.972153	-21.334
75	A-2	1.0	1.199999	184.60125
75	A-3	1.0	-0.916458	-21.147
75	A-1	1.0	-0.88861	-21.053625
75	B-2	1.0	0.1696206	-19.98075
75	B-3	1.0	-0.832911	-21.624125
75	B-1	0.0	-1.000001	-0.017439125
75	A-1	0.0	-1.0	-0.03962375
75	B-2	0.0	-0.749368	-0.1656012499999999
75	B-3	0.0	0.0303892	0.0042911625
75	A-2	0.0	-0.77722	-0.0279495
75	A-3	0.0	1.2	266.485
76	A-3	1.0	-1.000001	-22.9825
76	A-1	1.0	0.615189	-20.9585
76	B-3	1.0	1.032909	155.95624999999998
76	B-2	1.0	-0.0810151	-22.836375
76	B-1	1.0	0.1139256	-21.785125
76	A-2	1.0	1.06076	124.568625
76	A-2	0.0	-0.49873	-0.00976075
76	B-2	0.0	-0.248099	-0.00626675
76	B-1	0.0	1.2	269.37125000000003
76	B-3	0.0	0.0303844	0.0004152124999999
76	A-3	0.0	-0.77722	-0.0134174999999999
76	A-1	0.0	-0.777221	-0.0130941249999999
77	B-3	1.0	1.199999	312.455
77	A-3	1.0	-0.944299	-25.979875
77	A-2	1.0	0.949369	70.571375
77	A-1	1.0	0.1974662	-21.25975
77	B-2	1.0	0.893669	42.30287499999999
77	B-1	1.0	0.1417728	-21.79175
77	A-3	0.0	1.005059	143.29875
77	A-1	0.0	-0.1645563	-0.03050675
77	B-1	0.0	-1.0	-0.07214625
77	B-2	0.0	1.03291	114.16525
77	B-3	0.0	-1.0	-0.0321534999999999
77	A-2	0.0	1.144297	177.435
78	B-3	1.0	-0.999998	-24.14075
78	A-2	1.0	0.1696228	-23.05175
78	B-1	1.0	-0.972152	-24.069125
78	B-2	1.0	0.1417724	-23.197375
78	B-3	0.0	1.2	271.26
78	A-1	1.0	-0.999997	-24.176
78	A-3	0.0	1.088609	174.75500000000002
78	B-1	0.0	-0.582278	-0.0044727124999999
78	A-1	0.0	1.060759	158.26874999999998
78	A-3	1.0	-0.860759	-24.03675
78	B-2	0.0	1.005059	90.90675
78	A-2	0.0	0.1417686	0.0021781
79	B-3	1.0	1.060759	1133.50875
79	A-2	1.0	1.116459	110.5625
79	A-3	1.0	-0.999994	-23.945125
79	A-1	1.0	-0.0253166	-22.21075
79	B-1	1.0	0.0301666	30.030625
79	B-2	1.0	1.11646	816.97375
79	A-3	0.0	0.61519	0.077940875
79	B-1	0.0	-1.0	-973.9625
79	B-2	0.0	-0.805061	-560.3175
79	A-1	0.0	0.086076	70.584625
79	A-2	0.0	-0.97215	-0.021711125
79	B-3	0.0	1.2	1270.5925
80	B-3	1.0	-0.832911	-23.433625
80	A-3	1.0	-0.972148	-23.39075
80	A-1	1.0	-1.0	-23.71675
80	B-1	1.0	-0.972149	-23.916
80	A-2	1.0	1.2	196.555
80	B-2	1.0	1.060759	121.795875
80	A-1	0.0	-1.000002	-0.04440175
80	A-2	0.0	0.1417737	0.0047142375
80	A-3	0.0	0.0860751	0.0017774375
80	B-2	0.0	-0.66582	-0.0432349999999999
80	B-1	0.0	1.199999	256.77875
80	B-3	0.0	0.1139275	0.0077491749999999
81	A-1	0.0	1.172149	242.86125
81	A-2	0.0	-0.359491	-0.01061375
81	A-3	0.0	1.172151	261.04625
81	A-3	1.0	-1.000002	-23.6565
81	B-1	0.0	1.1443	219.92499999999995
81	B-2	0.0	-0.972154	-0.037571625
81	B-2	1.0	1.032908	110.01825
81	B-3	1.0	-0.415192	-23.483875
81	B-1	1.0	-0.999998	-24.072125
81	A-1	1.0	0.698729	-18.785375
81	A-2	1.0	1.199999	202.22000000000003
81	B-3	0.0	1.06076	171.80749999999998
82	B-2	1.0	-0.0253163	-17.116
82	A-2	1.0	1.08861	752.985
82	B-3	1.0	-0.97215	-835.15
82	A-3	1.0	-1.0	-867.2499999999999
82	B-1	1.0	0.1417714	139.93875
82	A-1	1.0	0.643039	644.7212499999999
82	B-1	0.0	-0.972149	-937.4625
82	B-2	0.0	-0.749367	-498.60875
82	B-3	0.0	0.0582277	49.714875
82	A-1	0.0	-1.0	-1000.7625
82	A-2	0.0	-0.721518	-494.02125
82	A-3	0.0	1.200001	1073.08875
83	A-2	1.0	1.116462	156.745
83	A-3	1.0	-0.972154	-14.67575
83	A-1	1.0	-0.972151	-13.340374999999998
83	B-1	1.0	-0.972151	-13.304875
83	B-3	1.0	-0.832907	-12.7635
83	B-2	1.0	1.060759	126.71975
83	A-1	0.0	-1.0	-0.2143474999999999
83	B-1	0.0	-0.972142	-0.13086125
83	B-2	0.0	-0.74937	-0.0792425
83	B-3	0.0	0.0303847	0.001732025
83	A-2	0.0	-0.777219	-0.079405
83	A-3	0.0	1.199999	296.09875000000005
84	B-2	1.0	-0.88861	-8.52775
84	B-1	1.0	1.199999	238.57375
84	B-3	1.0	-0.41519	-6.783250000000001
84	A-1	1.0	-1.0	-8.3355
84	A-2	1.0	0.1417715	-7.837874999999999
84	A-3	1.0	0.33671	-5.436887499999999
84	A-1	0.0	-1.0	-1.3176750000000002
84	B-1	0.0	-0.972153	-4.4472
84	B-2	0.0	-0.749371	-1.1244625
84	B-3	0.0	0.0303787	0.01479175
84	A-2	0.0	-0.777219	-0.767275
84	A-3	0.0	1.199999	243.015
85	A-3	1.0	1.144301	250.99
85	B-3	1.0	0.92152	67.498375
85	B-1	1.0	-1.0	-23.9395
85	A-2	1.0	1.005059	97.12675
85	B-2	1.0	-0.972148	-24.150625
85	A-1	1.0	-0.972147	-25.3085
85	A-3	0.0	-0.916471	-0.02947725
85	A-1	0.0	0.1974674	0.20490875
85	B-1	0.0	-1.0	-0.0072006249999999
85	B-2	0.0	0.1417759	0.0009768125
85	B-3	0.0	-1.000001	-0.008355875
85	A-2	0.0	1.17215	192.58
86	B-2	1.0	-0.972147	-20.990875
86	B-3	1.0	0.92152	36.09287499999999
86	B-1	1.0	-0.999998	-21.245375
86	A-2	1.0	1.005061	63.81325
86	A-3	1.0	1.1443	173.2175
86	A-1	1.0	-0.972153	-21.131125
86	A-1	0.0	0.1974154	0.0028651
86	A-3	0.0	-0.916459	-0.0144778749999999
86	B-1	0.0	-1.0	-0.011756375
86	B-2	0.0	0.1417754	0.0017551375
86	B-3	0.0	-1.0	-0.019642375
86	A-2	0.0	1.172149	140.855
87	B-2	1.0	-0.9443	-23.24775
87	B-1	1.0	1.172148	257.86
87	B-3	1.0	-0.52658	-22.683
87	A-3	1.0	-0.41519	-22.37975
87	A-1	1.0	1.03291	148.49375
87	A-2	1.0	-0.860759	-23.370375
87	A-1	0.0	-0.97215	-0.09690625
87	A-3	0.0	-0.0253137	-0.0004801999999999
87	A-2	0.0	1.032909	112.324125
87	B-2	0.0	0.1417726	0.0059596499999999
87	B-3	0.0	-1.000035	-0.20934
87	B-1	0.0	-0.999999	-0.06399125
88	A-2	1.0	1.144299	160.05749999999998
88	A-3	1.0	-0.972146	-27.781625
88	A-1	1.0	0.698731	-18.231875
88	B-1	1.0	0.61519	-19.09575
88	B-3	1.0	-0.832909	-21.2875
88	B-2	1.0	1.06076	113.06125
88	A-3	0.0	-0.0253159	-0.07696375
88	A-2	0.0	1.032909	97.310875
88	B-1	0.0	-0.999999	-0.0494056249999999
88	B-2	0.0	0.1694726	0.0035574375
88	B-3	0.0	-0.999988	-0.07023125
88	A-1	0.0	-0.582279	-0.0252986249999999
89	B-2	1.0	-0.944299	-23.703875
89	B-1	1.0	1.17215	234.505
89	B-3	1.0	1.17215	256.6575
89	A-2	1.0	0.1417737	-22.55075
89	A-3	1.0	1.199999	283.045
89	A-1	1.0	1.060757	148.84374999999997
89	A-3	0.0	-0.0253152	-0.0007381
89	A-2	0.0	1.032909	101.582875
89	B-1	0.0	-1.0	-0.058043625
89	B-2	0.0	0.1696206	0.0041906999999999
89	B-3	0.0	-0.999996	-0.053684125
89	A-1	0.0	-0.58228	-0.020245125
90	A-1	1.0	-0.1645574	-22.619750000000003
90	B-1	1.0	-0.999997	-24.16125
90	B-3	1.0	-0.860761	-22.811375
90	A-2	1.0	1.11646	162.11375
90	A-3	1.0	-0.999999	-22.5535
90	B-2	1.0	1.03291	112.85049999999998
90	B-2	0.0	-0.721519	-0.029279125
90	B-1	0.0	-0.9443	-1.3354
90	A-1	0.0	-1.0	-0.08851125
90	B-3	0.0	0.058223	0.0022724375
90	A-3	0.0	1.144299	260.94
90	A-2	0.0	-0.777221	-0.0482022499999999
91	B-2	1.0	-0.972149	-28.61275
91	B-1	1.0	1.116459	225.01
91	A-3	1.0	1.172149	297.845
91	B-3	1.0	-0.415192	-22.398125
91	A-1	1.0	1.060759	177.60875
91	A-2	1.0	-0.832913	-22.999875
91	B-2	0.0	0.0860725	0.33648875
91	B-1	0.0	-1.000002	-1.3221625
91	B-3	0.0	1.2	320.57375
91	A-3	0.0	1.200001	322.78375
91	A-2	0.0	0.1139222	0.0073671375
91	A-1	0.0	-1.000046	-0.273345
92	B-2	1.0	0.0582307	-21.44675
92	B-3	1.0	0.977219	108.874375
92	A-2	1.0	1.060759	126.571125
92	A-3	1.0	-0.972151	-22.51225
92	A-1	1.0	0.1696183	-21.5765
92	B-1	1.0	-0.1924061	-21.792625
92	A-1	0.0	-1.000001	-0.9168625
92	B-3	0.0	1.2	291.37625
92	B-1	0.0	-1.0	-1.894375
92	B-2	0.0	-0.777221	-1.7471
92	A-3	0.0	1.2	287.27625
92	A-2	0.0	-0.77722	-2.2881125
93	B-3	1.0	1.172149	270.295
93	A-2	1.0	0.0582274	-23.7585
93	A-3	1.0	-0.972149	-24.071
93	A-1	1.0	0.1417755	-23.52725
93	B-2	1.0	0.0025298	-23.635125
93	B-1	1.0	-0.1645587	-23.789
93	A-1	0.0	-0.972151	-0.060410125
93	A-3	0.0	-0.749371	-0.0418455
93	A-2	0.0	1.144302	176.86374999999998
93	B-1	0.0	-1.0	-0.0158902499999999
93	B-3	0.0	-0.805058	-0.029237125
93	B-2	0.0	1.08861	144.2225
94	A-3	1.0	-0.944294	-9.685125
94	A-2	1.0	1.144303	26.491625000000003
94	A-1	1.0	-0.999993	-21.859875
94	B-1	1.0	-0.999999	-3.616675
94	B-3	1.0	1.200003	44.3735
94	B-2	1.0	0.1139115	0.94847375
94	A-1	0.0	-1.000003	-21.641875
94	B-3	0.0	1.199976	41.635125
94	B-1	0.0	1.116465	25.506
94	B-2	0.0	-0.777219	-12.702125
94	A-2	0.0	-0.777221	-1.035925
94	A-3	0.0	1.19999	46.184375
95	A-2	1.0	1.144299	177.40375
95	A-3	1.0	-0.944295	-23.76025
95	B-1	1.0	-1.000003	-24.191125000000003
95	A-1	1.0	-0.1645572	-23.856875
95	B-2	1.0	0.1417739	-23.046375
95	B-3	1.0	-0.832908	-23.830625
95	A-1	0.0	-1.000001	-0.0546293749999999
95	B-3	0.0	1.2	298.38125
95	B-1	0.0	1.116459	214.16875
95	B-2	0.0	-0.77722	-0.0153198749999999
95	A-2	0.0	0.1417721	0.028616375
95	A-3	0.0	1.2	305.30499999999995
96	A-3	1.0	-0.9443	-23.486500000000003
96	A-2	1.0	1.144299	181.20375
96	A-1	1.0	-0.999996	-23.697
96	B-1	1.0	-0.999997	-23.693625
96	B-3	1.0	1.2	316.7025
96	A-1	0.0	-1.0	-0.03951475
96	B-1	0.0	-1.0	-0.052175625
96	B-2	0.0	0.1139239	0.0034790749999999
96	B-3	0.0	0.0303734	0.18238875
96	A-3	0.0	1.2	316.7925
96	A-2	0.0	0.1139283	0.0037298624999999
96	B-2	1.0	1.00506	99.17000000000002
97	A-2	1.0	1.172149	182.45375
97	A-3	1.0	-0.944298	-24.24375
97	A-1	1.0	-0.972146	-24.59625
97	B-1	1.0	-1.000001	-24.83725
97	B-2	1.0	0.1417706	-23.6345
97	B-3	1.0	-0.999996	-24.58725
97	A-3	0.0	1.2	241.9775
97	B-1	0.0	1.116459	219.375
97	B-2	0.0	-0.777219	-0.0398219999999999
97	B-3	0.0	0.0303799	0.001274775
97	A-2	0.0	0.1417729	0.008512
97	A-1	0.0	-1.0	-0.0588649999999999
98	B-1	1.0	-1.0	-0.09179625
98	A-1	1.0	-1.0	-0.08950875
98	B-3	1.0	1.172151	0.053353375
98	A-2	1.0	1.172149	0.041590625
98	A-3	1.0	-0.9443	-0.08879875
98	B-2	1.0	1.03291	0.01492225
98	A-3	0.0	1.200004	0.0549988749999999
98	B-1	0.0	-0.97215	-0.022649375
98	B-2	0.0	-0.74937	-0.0176243749999999
98	B-3	0.0	0.0304059	0.00065475875
98	A-2	0.0	-0.77722	-0.0222862499999999
98	A-1	0.0	-0.999999	-0.0259322499999999
99	A-2	1.0	1.144302	149.57
99	A-3	1.0	-0.944298	-23.162000000000003
99	A-1	1.0	-0.972151	-23.44275
99	B-1	1.0	-1.000001	-23.911375
99	B-2	1.0	0.1139252	-21.830375
99	B-3	1.0	-0.999998	-22.919875
99	A-1	0.0	-1.0	-0.006317
99	B-1	0.0	-0.972147	-0.0034723624999999
99	B-2	0.0	-0.749368	-0.002595625
99	B-3	0.0	0.0303846	0.0001336749999999
99	A-2	0.0	-0.77722	-0.0045617499999999
99	A-3	0.0	-0.415188	-0.001934275
100	B-3	1.0	1.172151	910.45625
100	A-1	1.0	-0.999999	-20.98375
100	A-3	1.0	-0.888611	-20.708375
100	A-2	1.0	1.005059	67.020875
100	B-1	1.0	-1.0	-654.8375
100	B-2	1.0	0.0860775	-19.19375
100	A-2	0.0	0.1139294	0.00137535
100	B-1	0.0	-0.97215	-624.29625
100	B-2	0.0	-0.749369	-0.0071128749999999
100	B-3	0.0	0.030356	19.889875
100	A-3	0.0	0.0025327	9.32875e-05
100	A-1	0.0	-1.0	-0.0140812499999999
101	B-2	0.0	0.0303857	0.0003953
101	A-2	1.0	1.17215	173.44375
101	A-3	1.0	-0.944298	-22.3625
101	A-1	1.0	0.643039	-19.792875
101	B-1	1.0	-0.999998	-22.6535
101	B-2	1.0	0.1139226	-21.351125
101	B-1	0.0	1.199999	256.74875
101	A-1	0.0	-1.000001	-0.02530225
101	B-3	0.0	0.0025322	4.6075e-05
101	A-3	0.0	1.199999	259.5375
101	A-2	0.0	-0.83291	-0.0130551249999999
101	B-3	1.0	-1.0	-22.439
102	B-3	1.0	1.199999	271.39125
102	A-1	1.0	-0.1924049	-22.771
102	B-2	1.0	0.97722	78.08225
102	A-2	1.0	1.032909	109.665
102	A-3	1.0	-0.999999	-22.8625
102	B-1	1.0	0.64304	-19.513875
102	A-2	0.0	0.0860771	0.0017388125
102	B-1	0.0	-0.9443	-1.2796625
102	B-2	0.0	-0.721519	-0.010480875
102	B-3	0.0	0.0582293	0.00074975
102	A-1	0.0	-1.0	-0.02000175
102	A-3	0.0	1.200001	272.92875000000004
103	A-3	1.0	1.1443	178.41375000000002
103	B-1	1.0	-1.000001	-21.23075
103	A-2	1.0	0.97722	60.10625
103	A-1	1.0	0.169623	-20.426
103	B-2	1.0	0.1417772	-19.957875
103	B-3	1.0	-1.000004	-21.386625
103	B-1	0.0	1.1443	169.27
103	B-3	0.0	-0.470889	-0.005123275
103	A-3	0.0	1.2	212.585
103	A-2	0.0	0.253161	0.0035603625
103	A-1	0.0	0.615193	0.0767399999999999
103	B-2	0.0	-0.944301	-0.018820875
104	B-1	1.0	-1.000003	-22.152625
104	A-2	1.0	1.11646	135.2675
104	A-3	1.0	-0.972149	-21.755875
104	A-1	1.0	-0.1645566	-21.232125
104	B-2	1.0	0.0860789	-20.927125
104	B-3	1.0	-1.0	-22.180375
104	A-3	0.0	1.199999	245.23375
104	A-2	0.0	0.08608	0.00091815
104	B-1	0.0	1.1443	194.77375
104	B-2	0.0	-0.749369	-0.00588675
104	B-3	0.0	0.0303824	0.0002522874999999
104	A-1	0.0	-1.000001	-0.00882975
105	B-2	1.0	0.0860759	-19.918
105	A-3	1.0	-0.999996	-21.11525
105	A-1	1.0	-1.000001	-21.562875
105	B-3	1.0	1.199998	250.31875
105	A-2	1.0	1.11646	137.80625
105	B-1	1.0	-1.0	-28.620625
105	B-1	0.0	1.2	245.04
105	A-3	0.0	1.2	249.28625
105	A-2	0.0	0.0860698	0.022410375
105	B-2	0.0	0.0860762	0.0013955125
105	A-1	0.0	-1.0	-0.02734325
105	B-3	0.0	0.0025353	0.0001168124999999
106	B-3	0.0	0.0032859	8.635875e-05
106	B-2	0.0	-0.777218	-0.001375375
106	B-1	0.0	-1.0	-0.0012563999999999
106	A-1	0.0	-1.0	-0.0019298249999999
106	B-3	1.0	-0.999999	-23.59175
106	B-1	1.0	-1.000004	-23.885875
106	B-2	1.0	0.0860741	-23.091375
106	A-1	1.0	-0.999997	-24.0315
106	A-3	1.0	-0.972149	-23.76
106	A-2	1.0	1.116463	134.2925
106	A-3	0.0	1.199999	229.47125
106	A-2	0.0	0.0869491	0.0002986162499999
107	A-2	1.0	1.144298	345.5825
107	A-3	1.0	-0.9443	-4.0721
107	B-3	1.0	-0.86076	-0.7699625
107	B-2	1.0	1.032911	8.4967
107	A-1	1.0	0.698734	0.36658625
107	B-1	0.0	-0.972152	-1.508775
107	A-1	0.0	-0.999999	-0.6106975
107	A-3	0.0	1.200006	43.81025
107	B-1	1.0	-1.000001	-1.9667
107	B-3	0.0	0.0582145	0.0121797875
107	A-2	0.0	0.1417752	41.140125
107	B-2	0.0	-0.74937	-0.86205
108	A-2	1.0	1.172149	187.68125
108	A-3	1.0	-0.91646	-22.7365
108	A-1	1.0	0.69873	-18.551375
108	B-2	1.0	0.1417746	-22.033875
108	B-1	1.0	-1.000001	-22.639625
108	B-1	0.0	-1.000002	-0.0853525
108	B-2	0.0	-0.77722	-0.045040375
108	B-3	0.0	0.0303791	0.0004319625
108	A-3	0.0	1.199999	283.2875
108	A-2	0.0	0.086072	0.0021478
108	A-1	0.0	-1.0	-0.055025125
108	B-3	1.0	-1.0	-22.79475
109	A-2	0.0	0.0860786	0.001103525
109	B-3	0.0	0.0303824	0.0003292124999999
109	B-2	0.0	-0.77722	-0.007281375
109	B-1	0.0	1.116459	189.9725
109	A-3	0.0	1.200002	275.035
109	B-2	1.0	0.1139236	-21.555125
109	A-1	0.0	-1.000002	-0.0294892499999999
109	A-2	1.0	1.172149	179.425
109	B-3	1.0	-1.0	-22.81075
109	A-1	1.0	0.643042	-20.18675
109	B-1	1.0	-1.0	-22.6135
109	A-3	1.0	-0.9443	-22.790375
110	A-2	1.0	1.144301	158.40125
110	A-3	1.0	-0.944297	-21.97625
110	A-1	1.0	-0.999998	-22.007125
110	B-2	1.0	0.141772	-21.22375
110	B-1	1.0	-0.999999	-22.443875
110	A-1	0.0	-1.0	-0.010162875
110	B-1	0.0	-0.972149	-0.00470605
110	B-2	0.0	-0.749371	-0.0119033749999999
110	B-3	0.0	1.2	904.48625
110	A-2	0.0	0.1139274	0.0007502125
110	A-3	0.0	1.2	250.89125
110	B-3	1.0	-1.0	-694.9499999999999
111	A-2	1.0	1.144299	371.05875
111	A-3	1.0	-0.944292	-11.98125
111	A-1	1.0	-1.000001	-590.26625
111	B-1	1.0	-1.0	-9.189875
111	B-2	1.0	0.1417619	0.811075
111	B-2	0.0	0.0860536	0.71924125
111	A-1	0.0	-1.000001	-589.3612499999999
111	B-3	0.0	0.000968	0.5802725000000001
111	A-3	0.0	1.199985	89.899125
111	A-2	0.0	-0.805062	-260.71125
111	B-3	1.0	-0.999999	-644.7775
111	B-1	0.0	-0.999992	-14.55675
112	A-3	0.0	1.2	121.43175
112	A-2	0.0	0.1139247	0.0009087374999999
112	B-3	0.0	1.199999	122.109875
112	B-2	0.0	-0.74937	-0.009644375
112	B-1	0.0	-0.972151	-0.01629675
112	A-1	0.0	-1.0	-0.021107625
112	B-1	1.0	-0.999998	-23.045375
112	B-2	1.0	0.086074	-22.050375
112	A-1	1.0	0.1696235	-21.869375
112	A-2	1.0	0.949369	48.7555
112	B-3	1.0	1.2	123.99675
112	A-3	1.0	1.172149	113.5475
113	A-3	1.0	-1.0	-22.483
113	A-1	1.0	-0.1645552	-24.060875
113	A-2	1.0	0.0860759	-21.979125
113	B-3	1.0	1.11646	195.48875
113	B-2	1.0	0.977221	73.56475
113	A-1	0.0	-0.999993	-26.949125
113	B-1	1.0	-1.000002	-22.77025
113	B-1	0.0	1.144302	239.25875
113	B-2	0.0	-0.74937	-0.0154756249999999
113	B-3	0.0	0.0303803	0.0004327249999999
113	A-3	0.0	-0.41519	-0.01122725
113	A-2	0.0	0.141772	0.002920275
114	A-1	1.0	0.1974652	-22.31125
114	B-3	1.0	1.088608	212.1975
114	A-3	1.0	1.200001	319.08374999999995
114	B-1	1.0	-0.999997	-23.177625
114	A-2	1.0	0.977219	83.50150000000001
114	A-1	0.0	-0.972149	-0.052312
114	B-1	0.0	-0.97215	-0.021386625
114	B-2	0.0	-0.74937	-0.044244625
114	B-3	0.0	0.0303798	0.0006674875
114	A-2	0.0	-0.749369	-0.01749525
114	A-3	0.0	0.0303842	0.0011622625
114	B-2	1.0	0.1139236	-22.33275
115	A-2	1.0	1.144299	156.91125000000002
115	A-3	1.0	-0.944296	-22.578125
115	A-1	1.0	0.670893	-19.938
115	B-1	1.0	-1.000001	-22.70925
115	B-3	1.0	-0.415193	-22.344
115	B-2	1.0	1.03291	97.73812499999998
115	B-1	0.0	1.144299	218.98125
115	B-2	0.0	-0.749369	-0.038359
115	B-3	0.0	0.0303809	0.00087005
115	A-2	0.0	-0.777213	-16.725875000000002
115	A-3	0.0	0.030381	0.0014309
115	A-1	0.0	-0.999999	-0.06334
116	A-3	0.0	1.2	301.38375
116	A-2	0.0	0.1139368	0.57616
116	B-3	0.0	0.0582294	0.0006334625
116	B-1	0.0	-0.97215	-0.0256037499999999
116	B-2	0.0	-0.74937	-0.0144869999999999
116	B-3	1.0	-1.000002	-22.79775
116	A-1	0.0	-1.0	-0.0611258749999999
116	A-2	1.0	1.032908	116.081375
116	A-1	1.0	-0.1645582	-22.6095
116	B-1	1.0	-0.944301	-22.93925
116	A-3	1.0	-0.972152	-22.562375
116	B-2	1.0	0.1139251	-22.072625
117	A-2	1.0	1.116459	151.19375
117	A-1	1.0	-0.97215	-22.8485
117	B-2	1.0	0.1139235	-22.423375
117	B-1	1.0	-0.999999	-23.149125
117	A-3	1.0	-0.972151	-22.880625
117	B-2	0.0	-0.944299	-0.02526075
117	B-1	0.0	1.17215	244.45875
117	B-3	0.0	-0.44304	-0.0110129999999999
117	A-2	0.0	0.33671	0.0149729999999999
117	A-1	0.0	0.69873	0.52479375
117	A-3	0.0	0.0303776	0.0007301874999999
117	B-3	1.0	-1.0	-23.464125
118	A-2	1.0	1.116458	172.2875
118	A-3	1.0	-0.972152	-22.76275
118	A-1	1.0	0.643042	-20.755000000000003
118	B-3	1.0	1.172149	306.1575
118	B-2	1.0	0.0860771	-22.47225
118	A-1	0.0	-1.000001	-0.0585958749999999
118	A-2	0.0	0.1139011	0.0026001749999999
118	B-1	0.0	-0.972149	-0.0690925
118	B-2	0.0	-0.749371	-0.060990625
118	B-3	0.0	0.0582197	0.31242875
118	B-1	1.0	-1.000001	-23.241375
118	A-3	0.0	1.199999	331.04875000000004
119	A-2	1.0	1.1443	170.28625
119	A-2	0.0	0.1139152	0.0021855875
119	A-3	0.0	1.2	278.925
119	B-3	0.0	0.0303807	0.000380075
119	B-2	0.0	-0.77722	-0.014049875
119	B-1	0.0	-1.0	-0.0262068749999999
119	A-1	0.0	-1.0	-0.0407055
119	B-2	1.0	1.032908	105.419125
119	B-3	1.0	-0.860761	-22.841125
119	B-1	1.0	-1.000002	-23.206
119	A-3	1.0	-0.944299	-22.605375
119	A-1	1.0	0.698732	-18.973375
