# Supplementary material for: Autonomous optimization of an organic solar cell in a 4-dimensional parameter space
Source: Royal Society of Chemistry journal article supplement (doi:10.1039/d3ee02027d), 2023-01-01
Supplement: d3ee02027d3.csv [file d3ee02027d3.csv]

SampleNr	Cell	Iteration	Experiment	rPM6	rY12/(rY12+rPC70BM)	Concentration [mg/mL]	Spin Speed [rpm]	Mean Predicted PCE [%]	Mean Measured PCE [%]	Measured PCE [%]	Measured Jsc [mA/cm2]	Measured Voc [V]	Measured FF [%]	ff_Y12_UV	ff_Y12_tot_UV	ff_Y12_1.c_UV	ff_Y12_1.w_UV	ff_Y12_1a.a_UV	ff_Y12_1a.w_UV	ff_Y12_X_UV	ff_Y12_Xam_UV	ff_PC70BM_UV	ff_PC70BM_tot_UV	ff_PC70BM_1a.a_UV	ff_PC70BM_i.a_UV	ff_PC70BM_X_UV	ff_PC70BM_Xam_UV	ff_PM6_UV	ff_PM6_tot_UV	ff_PM6_1.c_UV	ff_PM6_1.h_UV	ff_PM6_1.w_UV	ff_PM6_1a.a_UV	ff_PM6_1a.w_UV	ff_PM6_X_UV	ff_PM6_Xam_UV	ff_atot_UV	ff_FOM_UV
1	A-1	0	4D	0.78	0.8636363636363636	21.15384615384616	2407.0	0.8640000000000001	1.21146	1.14547924072846	3.98952200259343	0.897448043040807	0.31993153041813	0.1988137359458808	0.1459544658131493	1.5616425519726775	0.0745138036593185	0.1341266694615087	0.1	0.1793747117598171	0.182702352388168	0.0077888793659236	0.3941172959157359	49.99999999999999	1.3764701742981462e-32	0.4843611736070267	0.9881422924901184	0.3433384238217411	0.2736129788971095	1.9889827302061964	0.2356134576926536	0.0601758363413384	0.1969191908423492	0.1523129050456892	0.3362641146331563	0.2471005756985276	0.8136847406259946	0.210645990205941
1	B-1	0	4D	0.78	0.8636363636363636	21.15384615384616	2407.0	0.8640000000000001	1.21146	1.22260665017739	4.20316158099133	0.894808090530915	0.325072900091892	0.1412310320945961	0.1318625759194824	1.5479292243435083	0.0713500699856487	0.3336657387815542	0.1	0.1802749399491554	0.357371728362864	0.0054725647861889	0.2769117781811588	49.99999999999999	2.1389496860811482e-20	0.3785778780273821	0.9881422924901184	0.3841392700592192	0.3226782590949192	1.9909636577361072	0.2659731216099413	0.0644364360586959	0.2400033119372953	0.1589023978451161	0.4411471820234624	0.285717101976392	0.7314526131955605	0.1241290106896641
1	A-3	0	4D	0.78	0.8636363636363636	21.15384615384616	2407.0	0.8640000000000001	1.21146	0.0	0.142855210213497	0.0001493128887973	0.0	0.0152627886541213	0.0145858355646487	1.4624672666654832	0.0851950932667672	0.3556468280591767	0.1	0.623701347141741	0.3721529937806207	0.0012622526319451	0.000757351579167	1.0709200994213676e-41	29.67241630287113	0.0323849256419209	1.784866832368946e-41	0.0099834183935071	0.0080427420857613	2.010473849473576	0.945125196254084	0.0896558524216385	0.205610039442208	0.1	0.3439137272163381	0.2552227869262519	0.0233859292295771	0.0093007139143571
1	B-3	0	4D	0.78	0.8636363636363636	21.15384615384616	2407.0	0.8640000000000001	1.21146	1.24249032322182	4.25271453722496	0.893739922071637	0.326900530694463	0.1438267686631573	0.1327856649623897	1.5488573550557343	0.0716028517150335	0.3232333187806932	0.1	0.1795195210585403	0.3501101099856153	0.0055659529970552	0.2816372216509973	49.99999999999999	2.383935816548377e-20	0.3807593173356889	0.9881422924901184	0.3864139731965565	0.3252496803554665	1.9908234650580008	0.2652433614570628	0.06438445222882	0.2417130407186964	0.1595719815632627	0.4397211616057707	0.287167988406488	0.7396725669688535	0.1272709903640605
1	B-2	0	4D	0.78	0.8636363636363636	21.15384615384616	2407.0	0.8640000000000001	1.21146	1.23525325104756	4.21482051345153	0.894292867320874	0.32771562889348	0.1374657909984451	0.132786688337347	1.5456088973151247	0.0712712765847398	0.3659616939813698	0.1	0.1818860237141678	0.3788573566235309	0.0052611996225092	0.2662167008989695	49.99999999999999	1.5702231278682225e-17	0.3646532478451665	0.9881422924901184	0.3906778158524801	0.3310509911157442	1.9909595221755447	0.2679111221301989	0.0651209520473873	0.2473759647533943	0.1605352783477743	0.4534607284406656	0.2919317694187684	0.7300543803520608	0.110263802116644
1	A-2	0	4D	0.78	0.8636363636363636	21.15384615384616	2407.0	0.8640000000000001	1.21146	0.0	0.84069393132592	0.0014854489293975	0.0	0.0354591703585331	0.1155590659055998	1.5429941277580768	0.0357598793004598	2.6589331543057635	0.1	0.1241535996927424	0.8158906698631517	1.0703098767569264e-15	6.421864543040343e-16	4.935485413810024e-07	2.2633034958385787	6.899481174492703e-16	8.225802256628865e-07	0.7523774854497668	0.8152159272608278	1.9865152508492403	0.3710577319559334	0.0715599877780499	0.4835198328316489	0.2403349271587129	0.8758464003072568	0.4462491762315305	0.9307749931664284	59517.308681991686
2	B-3	0	4D	0.88	0.25	20.75471698113208	1893.0	-0.514	0.0	0.0	0.068076416764173	7.51663553852115e-05	0.0	0.0152141347726008	0.0143626884908796	1.4596375760632916	0.0851950932667672	0.3440358394054358	0.1	0.5870277632619002	0.3644309093414434	0.0012221615270622	0.0007332969162373	1.6518412969180947e-19	31.08501914132272	0.0299711052578347	2.7530688281968253e-19	0.011474241389465	0.0093708105261305	2.001944743210525	0.9979492737938844	0.089943285755763	0.2166823590389419	0.1	0.3830011314802652	0.2653202394305787	0.0244667959332476	0.0085957794341692
2	B-1	0	4D	0.88	0.25	20.75471698113208	1893.0	-0.514	0.0	0.360178914325626	1.33039639089108	0.973550304304923	0.278085810795434	0.0024346573050669	0.0258073674337087	1.600345582691782	0.0283983644222557	9.999999999999565	0.1	0.0239090074406814	0.943396226415092	1.687675438308019e-17	8.539637164883852e-16	49.999996723571904	49.99999995774642	7.911471367251577e-16	0.9881422917223136	0.8947374194060145	1.0535919969161986	1.9901241709094244	0.3876974544540832	0.0713922866553568	0.5775432367807332	0.2499999999999914	0.9760909925593176	0.490464569572553	1.0793993643499082	13488980.911841655
2	B-2	0	4D	0.88	0.25	20.75471698113208	1893.0	-0.514	0.0	0.237446192869836	0.865538641517527	0.981048234589147	0.279632978481546	0.0440829991565023	0.0264497994939013	1.5938615614552865	0.0565699928759413	2.7456745667759e-25	0.1013060276387991	0.024414187548369	4.576124277959833e-25	0.0109443249811685	0.5537828440471275	49.99999999999999	1.3160912704147252e-29	0.5111629756873266	0.9881422924901184	0.4996826889362753	0.5031455946862075	2.002503081568994	0.2735088880300249	0.0585241107710591	0.4069302095642016	0.1782456221719038	0.4644228367643044	0.4041295073869326	1.0833782382272363	0.7751525326837183
2	A-2	0	4D	0.88	0.25	20.75471698113208	1893.0	-0.514	0.0	0.0	0.0301462847114022	5.02423390645975e-05	0.0	0.0520375803242106	0.0501537701151379	1.5785816191606217	0.0851950932667672	0.3637990429736349	0.1	0.0907474012772797	0.3774635860305444	0.0087113493169134	0.1911603809932984	21.34383143632545	1.3549312812353862e-36	0.3458824284294553	0.9726574640467402	0.3323806260196879	0.3113602991702275	1.9664949293416056	0.2505091084213551	0.0741261636082313	0.3367582668665673	0.1415534600099808	0.563370170293265	0.3594932425768872	0.5526744502786639	0.3134262545594744
2	A-1	0	4D	0.88	0.25	20.75471698113208	1893.0	-0.514	0.0	0.346024410234248	1.30554500481925	0.953804558402858	0.27787885198997	0.0024928873936192	0.0264246063723639	1.6003455826918318	0.0283983644222557	9.999999999999998	0.1	0.0238884909193929	0.9433962264150944	1.5072819663499804e-13	6.469160850191628e-12	42.31938067737442	42.31762646196409	5.8482797453330616e-12	0.9860203015390596	0.9143743597428337	1.0797401346895177	1.9907884627086103	0.3868990665953426	0.0711340966992069	0.5808512817367197	0.25	0.9761115090747589	0.4918919856549938	1.1061647410683508	8978694.030609613
2	A-3	0	4D	0.88	0.25	20.75471698113208	1893.0	-0.514	0.0	0.0	0.0248497705626534	2.66023854485908e-05	0.0	0.0149791494897158	0.0142614213142495	1.461206642954152	0.0851950932667672	0.3520848512821742	0.1	0.598227994246478	0.3698040682067581	0.0012641795402349	0.000758507762005	2.9951517487925624e-08	30.4161822926307	0.0318173460474994	4.9919193321283386e-08	0.0109613118443195	0.0088195124935319	2.0063687137464625	0.9792964509144312	0.0899559661752292	0.2046037389313461	0.1	0.3699546597060226	0.2542913101585825	0.0238394415697865	0.0085424969937986
3	B-3	0	4D	0.02	0.2551020408163265	19.81981981981982	2536.0	0.428	0.0	0.0	0.411523167904345	0.001927958015741	0.0	0.0469523542561134	0.1133396026450862	1.5012919257693682	0.0675732335498632	1.8139280008590573	0.2385896508212397	0.5464692886071428	0.7514424623325655	0.005427310000115	0.0646773979924898	11.317026665349625	11.146642675734936	0.3118434408191328	0.9496518706512102	0.0288699243393479	0.0293864253334781	1.978588349700316	0.5623991748584726	0.0783719007677203	0.4178906251384335	0.1031317787259738	0.1416872705737242	0.4105457058135301	0.2074034259710543	0.0365041732712808
3	B-2	0	4D	0.02	0.2551020408163265	19.81981981981982	2536.0	0.428	0.0	0.0	0.354190958282414	0.0016336590018555	0.0	0.0474061964243547	0.1093971107037266	1.5010896068059951	0.0671232008639175	1.707654251027917	0.2354149391144004	0.5467582250487547	0.7399957122117679	0.0051970056850458	0.0632128728219757	11.56332570192646	11.313067078368984	0.3159330070240945	0.950671385877222	0.0273022373755782	0.0274731714994856	1.9775433543630736	0.5500356232994243	0.0773413211332346	0.4062608101144252	0.1014878008164714	0.1373087679271508	0.4037331137523163	0.200083155025188	0.0376513130763977
3	A-2	0	4D	0.02	0.2551020408163265	19.81981981981982	2536.0	0.428	0.0	0.0	0.269633721020535	0.0010524942876954	0.0	0.0466984972559725	0.1095463481215826	1.5017848251196355	0.0681319654669101	1.7458216978828385	0.2351350700700963	0.5431261297311002	0.7442260848121941	0.005306057048206	0.0645570935883693	11.566679137043138	11.548023935606215	0.3200713213043337	0.9506849820528908	0.0268206971961944	0.0275925219436815	1.977949389170471	0.5556124276382823	0.0779735136765698	0.4287772067161836	0.1030360783093593	0.136802548964566	0.4167833462065354	0.2016959636536335	0.0354151554885617
3	A-3	0	4D	0.02	0.2551020408163265	19.81981981981982	2536.0	0.428	0.0	0.0	0.259406177203231	0.0008267817318551	0.0	0.0465529074419056	0.1107807279945751	1.501906295550544	0.0681247515860824	1.7796736677042266	0.2363868669439078	0.5419837120422568	0.7478645882656483	0.0053831918859555	0.0652727256779809	11.525283114702532	11.46428162896891	0.3193403293016853	0.9505166193379458	0.0274773935432545	0.028345175904596	1.9788194515050657	0.5619007894384632	0.0778740270573649	0.4315816840478521	0.1032446614042784	0.138675958656058	0.4183688899500006	0.204398629577152	0.007820857564843
3	B-1	0	4D	0.02	0.2551020408163265	19.81981981981982	2536.0	0.428	0.0	0.0	0.4285696024102	0.0016609192235768	0.0	0.0457689072512954	0.1108070213130335	1.5027889135735684	0.0677912746886651	1.8210108557900333	0.236718839909709	0.5425627805820395	0.7521696366767402	0.0054419644264432	0.0659970014697547	11.527422433903848	11.575545252790954	0.3231520548354933	0.9505253483771936	0.0263074044905857	0.0274249167588519	1.978280196311749	0.5538155599668965	0.0771796062243815	0.4424790012509988	0.1029363413065393	0.1342851645824672	0.4244488385089905	0.2042289395416401	0.0077378687144791
3	A-1	0	4D	0.02	0.2551020408163265	19.81981981981982	2536.0	0.428	0.0	0.0	0.392753986081259	0.0014340268861305	0.0	0.0530587998472515	0.1051648891318855	1.4981312674816536	0.0709804813420637	1.3820442496746952	0.1995374083316209	0.5063577639048861	0.6972822377207393	0.0059294887757444	0.0915816968047421	14.845125249139857	15.498117514920876	0.4409561365153795	0.9611527915558072	0.0076066143420498	0.0109423182896728	1.9387257498988868	2.883779327953453e-20	0.0646987647842602	0.8385267607407042	0.1	0.0526860995797345	0.5829066122544309	0.2076889042263005	0.006293591794183
4	B-3	0	4D	0.49	0.5686274509803921	17.6	1121.0	9.965	11.46608	0.0105384010105516	5.68144195094031	0.0094566444643005	0.196145832579752	0.168357247934492	0.1653758506391582	1.5134266363971265	0.0692290015018002	0.3822912447672353	0.1159321826365736	0.3620757647088317	0.389183194702935	0.0061319432295332	0.2049190279988446	32.818285252853144	5.528724673430045	0.4486520461077752	0.982045757421118	0.1387634477694647	0.0864488936830955	1.9728810653696	0.1542658564659378	0.060406089674839	0.0229947084243522	0.1	0.189272189183393	0.0369099578429956	0.4567437723210984	0.0327802409202221
4	A-1	0	4D	0.49	0.5686274509803921	17.6	1121.0	9.965	11.46608	11.7283244241485	20.3608009077205	0.848290861326675	0.679041512255794	0.1584283853309565	0.1603342481873035	1.5131490701759327	0.0693159276334293	0.4120298067317016	0.1225043891628932	0.3672189819679771	0.4071320864178208	0.0055054611051522	0.1868288064806924	33.33517870934576	5.2694496636883565	0.4279003699695203	0.9823192326423564	0.1415743479061822	0.0894544843493235	1.9724598051829645	0.1685067197288427	0.0621534804552685	0.0318551748414389	0.1	0.2048806480625028	0.0504153105170545	0.4366175390173193	0.0348946467929816
4	B-2	0	4D	0.49	0.5686274509803921	17.6	1121.0	9.965	11.46608	10.6846867918214	19.8846165958714	0.841544099744503	0.638509987607208	0.1632896452390993	0.1562130388256689	1.5135806016930171	0.0693871358953283	0.3566622463839129	0.1131807112905374	0.3600149111283031	0.3728194017607159	0.0055515476391498	0.2012749225081407	35.65564177613093	5.885422742439573	0.4638663576603915	0.9834508514921664	0.1273652902797178	0.0764191741681343	1.9724375995984147	0.1381950429525106	0.0593076749523501	2.3839253205235284e-12	0.2499997176071236	0.1761187312113053	3.973208867523428e-12	0.433907135501944	0.032899320886626
4	A-3	0	4D	0.49	0.5686274509803921	17.6	1121.0	9.965	11.46608	11.7235710041672	19.5849667065949	0.847370313084358	0.706421381493146	0.1580671469636314	0.1563287551457202	1.5133080225369533	0.0693160321467149	0.3890021939960039	0.118656448602151	0.3624431159502121	0.3933279383580172	0.0055422528010633	0.1899606763219757	33.67499306519021	5.3597389070838375	0.4404176273902316	0.9824945259986247	0.136093378544137	0.085029990163131	1.9723629053965244	0.1600803672680676	0.0611938990510509	0.0247915297036628	0.1	0.1971392566595564	0.0396796827822255	0.431319421630827	0.0327354581725238
4	A-2	0	4D	0.49	0.5686274509803921	17.6	1121.0	9.965	11.46608	11.7277466058856	19.9070620728248	0.847876666306504	0.694823853763645	0.1647379108891759	0.1619317742259145	1.5137674746645406	0.0694546272737201	0.3829660540909176	0.115654967550447	0.3567383691643225	0.3896025223832356	0.0061034364976277	0.2059081649209948	33.13643110746338	5.6887075089631365	0.4536190831149356	0.9822150719473328	0.1380282222423716	0.0860831266708992	1.9729234946054104	0.1545043679477874	0.0602793905205809	0.0236632282327083	0.1	0.1896425477207418	0.0379423175224928	0.4539230658178087	0.0313090528559854
4	B-1	0	4D	0.49	0.5686274509803921	17.6	1121.0	9.965	11.46608	0.0028694840141379	2.95042012663361	0.0040906381474547	0.237754575536616	0.0163646000184407	0.0147915464797939	1.472580853617458	0.0851950932667427	0.3038746112416967	0.1000000000005112	0.6577343378631308	0.3361911126414418	0.0010124703612854	0.0014644931267673	0.8464553065119146	39.64582239688431	0.0651214812700795	0.5851928522790775	0.0103876562962837	0.0062325939165861	2.047276265620685	1.4999999999999998	0.0899999999999999	1.3363541020273989e-08	0.249999999999778	0.2771441808667895	2.2272567871056024e-08	0.0224886335231473	279.2393068872908
5	A-2	0	4D	0.97	0.0	19.469026548672566	993.0	-0.006	0.08204	0.0	0.0108584454133664	1.70584563275434e-05	0.0	0.0157628918316178	0.0149122136696987	1.4602892251573574	0.0851950932667672	0.3460328617993274	0.1	0.3928315149241496	0.3657725601002727	0.0016907699688165	0.0086920723849237	4.540895890768342	22.177030634315887	0.2289747208852159	0.8832888249930451	0.0153120149116264	0.014356552379071	1.965083429960924	0.4572820572481229	0.0796586341125873	0.337600470083799	0.1049384506069605	0.3781937641906343	0.3600685802275949	0.0379608384336935	0.0088521272770112
5	A-3	0	4D	0.97	0.0	19.469026548672566	993.0	-0.006	0.08204	0.0	0.0022339055172118	2.74819004262892e-06	0.0	5.9929813625566515e-12	4.955978895355486e-11	1.4482527427619925	0.0832605196222372	7.669638424574085	0.1486827635733284	3.459719172793829e-11	0.9274454372494644	0.0148358915100478	0.5263890543086883	34.88078347379285	1.2355492220814147e-08	0.3674669206616852	0.9830894376827056	0.5965099924870744	0.9060910539487456	1.9801165640521108	0.1809290257731532	0.0633135091900891	0.9189872179188674	0.2178531019169365	0.6325330793037176	0.6049999677929828	1.4324801083069938	25427376.21127204
5	B-1	0	4D	0.97	0.0	19.469026548672566	993.0	-0.006	0.08204	0.0	0.148463836539845	0.0001707584213159	0.0	0.0149683162684431	0.0141104698503336	1.4597693156674858	0.0851950932667672	0.3426891840922669	0.1000000000000395	0.6320054335957065	0.3635229828400425	0.0013012650448071	0.0007807590268843	2.950700842454992e-40	28.429254837458267	0.0349700578757208	4.91783473742499e-40	0.0097287812418109	0.00743527197271	2.025547706774393	0.8634071288265424	0.0899999999999999	0.1642552327886484	0.1	0.3330245085285727	0.214921960284533	0.022326500849928	0.0107573203245266
5	B-2	0	4D	0.97	0.0	19.469026548672566	993.0	-0.006	0.08204	0.0	0.0303435819048907	6.82110648190654e-05	0.0	0.0367519326158562	0.030136365470433	1.5078056662936432	0.0851950909541622	0.2199940336588178	0.1	0.0513130431881796	0.2682873589667515	0.0092508697726728	0.1698127206268375	17.756405916389202	7.59444100181438e-12	0.28913929504791	0.9673138629243156	0.3073938750354655	0.3873551078854246	1.9550297478647816	0.184913690263516	0.0724124021409839	0.6601263048612585	0.2070692127414634	0.6595476617639103	0.5238572532885417	0.5873041939826952	0.1539013181043744
5	B-3	0	4D	0.97	0.0	19.469026548672566	993.0	-0.006	0.08204	0.0820373108324268	0.262627406419234	1.01914173181849	0.306504450955127	1.2715575472529995e-20	7.016232368666277e-20	1.5418295602052705	0.0612398795060502	4.917825271710074	0.2442907606653913	3.894898732101625e-20	0.8912615078487164	9.565569564528944e-26	7.459739886557692e-26	0.1798531845108219	26.66586835163313	4.141101648189078e-26	0.23062441506043	1.4854971083784732	1.8013901904146374	2.0029959808870794	0.3945318176800556	0.0693047594829885	0.6126514284373022	0.2499999999998287	1.0	0.5052164324143854	1.8013901904146374	0.2650344931714797
5	A-1	0	4D	0.97	0.0	19.469026548672566	993.0	-0.006	0.08204	0.0	0.141751317193153	0.0001588960465931	0.0	0.0150522650560844	0.0147635606190285	1.4598203190416128	0.0851950932667672	0.380819867576062	0.104643494869886	0.6221276650552804	0.3882668777062977	0.0013282299744486	0.0007969379846692	8.875643827335211e-58	28.77862941274688	0.0335824927597136	1.4792739712225344e-57	0.0105027380620544	0.0081702586802058	2.0118192876929224	0.8598237656118213	0.0899999999999999	0.1779170185843561	0.1	0.3442898421850061	0.2287095079988446	0.0237307572839036	0.0092216322664401
6	A-1	0	4D	0.21	0.3544303797468354	18.803418803418804	1379.0	3.748	2.89859	3.3657823252311	9.50506995515606	0.627360018036083	0.564434914836778	0.0727274713140044	0.105164471066095	1.5020149200916884	0.0625312040591078	0.8460075287375559	0.1915322612951238	0.4236443765380475	0.5850644010658556	1.113480996648002e-11	1.1722096931014022e-10	9.927433307170896	10.27355341972554	4.722127535769092e-10	0.9430060507159612	0.1186433084547761	0.1430731471830173	1.9762238165278063	0.3412372661023994	0.0799210272486596	0.6059099585675605	0.25	0.5763556229897397	0.5024504145295312	0.2482376183663333	3537.56674778986
6	A-3	0	4D	0.21	0.3544303797468354	18.803418803418804	1379.0	3.748	2.89859	1.80885854918114	9.60497960197593	0.602178212908321	0.312739776491032	0.0769624129804771	0.1075305818834711	1.5008352071417868	0.0626666111297036	0.7971830887208297	0.1916774564168481	0.4260572286044194	0.5705645130951871	9.452658619957988e-13	4.100204024437687e-12	3.737619911270963	10.525753766954765	1.6245811496284038e-11	0.8616752937616902	0.1209845428	0.1448547191098913	1.9754744058296547	0.3457384864055727	0.0801062268104562	0.5972993884793293	0.25	0.5739427713793347	0.4988722070909513	0.2523853009974627	2421.976781864404
6	B-1	0	4D	0.21	0.3544303797468354	18.803418803418804	1379.0	3.748	2.89859	3.44264505532411	9.58829613940587	0.782796618761291	0.458671618844058	0.0736407926142103	0.1054624256969184	1.5018607156230488	0.0626740012197906	0.8321196439236523	0.1927913023148499	0.4276574044020157	0.5810405907455127	7.372133156193988e-13	5.5865818035191135e-12	6.977971918243673	8.089040299662463	2.265397422621889e-11	0.9208231428575866	0.1171020595396217	0.141142507618793	1.9760163493967449	0.3443849449606288	0.0796520101310139	0.6052948357499821	0.25	0.5723425955753303	0.5021964898516668	0.246604933321298	1928.7738762231588
6	B-3	0	4D	0.21	0.3544303797468354	18.803418803418804	1379.0	3.748	2.89859	3.0410559949729	9.48192739930629	0.786256232238019	0.407909378228659	0.0916455920560777	0.1530843317050255	1.4987119004578209	0.0680862011700451	1.0703949232097671	0.1876141760941511	0.4758121210507488	0.6408035060073921	0.0072088058845181	0.1373512898424606	18.4532651374954	11.69568786504725	0.4269111529645324	0.9685093344542166	0.0417263311129793	0.0312971064186809	1.963548065227616	0.112216353046663	0.0608663897954761	0.1500565130909801	0.1	0.0972767259847189	0.200060276088528	0.3217327279661671	0.0039344057126011
6	B-2	0	4D	0.21	0.3544303797468354	18.803418803418804	1379.0	3.748	2.89859	4.10024984789773	9.87491128179763	0.800163941671762	0.518917290849607	0.0933709211143302	0.1530684501703418	1.4995030312844908	0.0681556890722713	1.0393588961483375	0.1849295552444228	0.4712741000321308	0.6340032671249134	0.0073157987385738	0.1406756137879861	18.62901638152637	11.926290392719247	0.4331184722300549	0.9687971559181554	0.0410798941789366	0.0310530130715912	1.9628702598023369	0.0956978964620678	0.0603695873757934	0.1559175526677338	0.1000000000000001	0.0956074277378142	0.206262643482057	0.3247970770299192	0.003534840198214
6	A-2	0	4D	0.21	0.3544303797468354	18.803418803418804	1379.0	3.748	2.89859	1.25360638887029	9.4984943954731	0.474993519538775	0.277855336015682	0.0741620534401868	0.1065284890575716	1.5010096252237044	0.0627447304623822	0.8364285253170468	0.1941552925438804	0.4262379592613301	0.5822973510863907	1.3211317678601036e-11	1.4723040648458428e-10	10.544263582659887	10.620015361814254	5.89093007479814e-10	0.9461606417014776	0.1193511357755869	0.1433987796902193	1.976133279713964	0.3457825575013908	0.0799056764151499	0.6014865108602618	0.2499999999999999	0.5737620401495769	0.5006186132123936	0.2499272688950213	3806.066523743199
7	A-1	0	4D	0.4	0.1166666666666666	17.886178861788622	2021.0	2.2230000000000003	2.51651	1.39564571319511	8.851351555479	0.511884022546573	0.308030713320822	0.0296377441759123	0.0229778310621882	1.5457561018776838	0.0706641051981029	0.1752894729708588	0.1000000000005236	0.1256815837420528	0.2260955153939611	0.0044662521956274	0.1128240834643999	24.6614672263373	5.717875422987714	0.6171126184918929	0.9762484104892194	0.0565910149816037	0.047023845445912	1.9615303269633724	0.1030416701485588	0.0593818752214601	0.2309418988367371	0.2499999961766116	0.2572057977660541	0.277927854113555	0.1828257599725002	0.0092979957883976
7	A-2	0	4D	0.4	0.1166666666666666	17.886178861788622	2021.0	2.2230000000000003	2.51651	2.67489566033858	8.82324107192795	0.792199164188687	0.38268753892116	0.0294829475714063	0.0231037890440863	1.5458486169881738	0.0703114981871386	0.183632267029274	0.1000000000000005	0.126941330013426	0.2343347444400399	0.0044940119785659	0.1123998034487019	24.41101554352556	5.65565096848982	0.6175688548661667	0.9760105702642962	0.0565937498456928	0.0465000862274737	1.961480346059441	0.1049633758036122	0.0593429256078822	0.2216470255860364	0.249999999996328	0.2554898151204071	0.2697594206319285	0.182003678720262	0.0098069746988195
7	B-1	0	4D	0.4	0.1166666666666666	17.886178861788622	2021.0	2.2230000000000003	2.51651	2.2886493837053	9.16568152941079	0.759815469121131	0.328629367123512	0.0288494707575222	0.0225210240367212	1.5452077820686478	0.0695887779271735	0.1806390705052751	0.1000000000061112	0.1241443040187766	0.2313989618638419	0.0044269649534431	0.1121055822445858	24.723349839802463	5.371310481385647	0.6179678802207775	0.9763064521954776	0.0571244687551143	0.0467834407983802	1.9611664500644843	0.1038672695682833	0.0596053903976003	0.218973757094094	0.2499999999999095	0.2578878157604459	0.2673757922000613	0.1814100470796872	0.0086350695373182
7	B-2	0	4D	0.4	0.1166666666666666	17.886178861788622	2021.0	2.2230000000000003	2.51651	3.04173678291312	9.38902429683631	0.859591868344931	0.376885013306895	0.0308356682750885	0.0237396399989936	1.5479796942149815	0.0703441453861725	0.1698759691928707	0.1000000000000001	0.1302108794144334	0.220653684477211	0.0048514777932992	0.117690524237328	23.658695855493782	5.360362449042637	0.6455273399401926	0.9752666011572044	0.0580986777718371	0.0408867059495823	1.9618310125055711	0.1010402453190155	0.0590772093236975	0.103745894358406	0.2499999999808899	0.224261780645374	0.1474195376343751	0.1823168701859041	0.0112634321355039
7	B-3	0	4D	0.4	0.1166666666666666	17.886178861788622	2021.0	2.2230000000000003	2.51651	4.2783736793166	9.03772592928393	0.926102259942563	0.511164403367119	0.0288279111525565	0.0226790359976563	1.5451137093290133	0.0696435637228486	0.1867041034516686	0.100000001499064	0.1256497637451962	0.2373244306626893	0.0045692278634513	0.1137144474748315	24.28701611587756	5.491154704227709	0.6300176718756757	0.9758910430560934	0.0558728422901694	0.0441005765374213	1.96127821460141	0.0995512613114632	0.0591454054593108	0.1893025435933589	0.2499999999979632	0.244332564379128	0.2398352129103055	0.1804940600099093	0.00912203929976
7	A-3	0	4D	0.4	0.1166666666666666	17.886178861788622	2021.0	2.2230000000000003	2.51651	1.41977705360949	8.36179060546289	0.548730148473232	0.309429733333436	0.0292502287574978	0.0228160140690123	1.545659080699105	0.0706871553345228	0.1800285686026926	0.100000000800054	0.1262856417097942	0.2307974039017411	0.0044806409363827	0.1117542786361517	24.34158318483146	5.924304437730704	0.6185550529857512	0.9759437885095884	0.0560838666592784	0.0460996057892647	1.961366940694441	0.1020464008240738	0.0593732893696407	0.2219762390729904	0.2499999995954367	0.2551593053044546	0.2700518926475674	0.1806698984944288	0.009544939528472
8	A-1	0	2D	0.21	0.0632911392405063	20.0	1200.0	1.504	1.15011	0.591934233555761	3.95503901398275	0.475448676397208	0.314788633865271	0.0095865863922657	0.0111324991542588	1.5429823313651472	0.0612163322917948	0.561257897100924	0.1000000004261519	0.090138260233403	0.4833189065943941	0.0050090288723293	0.0619349919100659	11.764670575608749	3.4729377230359018	0.5014788091142625	0.9514746473566716	0.0497338361644498	0.0504372129917822	1.9624189534038152	0.1615881820254081	0.0672918963809232	0.4141428227053841	0.1566623716272073	0.4083829306523345	0.4083673555965161	0.123504704056107	0.0052026743298743
8	A-2	0	2D	0.21	0.0632911392405063	20.0	1200.0	1.504	1.15011	0.300852658980831	4.01927474597075	0.263550118146957	0.284016090242809	0.009089294090195	0.0124494858060558	1.54333779002729	0.0594118724635569	0.7696867636272758	0.1065943011045451	0.0960622168598346	0.5619436385505774	0.005311909266766	0.0645324783383452	11.548640930689954	3.3052562774960568	0.4979428889846388	0.9506117595027213	0.0534792017591361	0.0526161881054165	1.9622381251482208	0.1634566143494714	0.0681976901331961	0.3838626302313461	0.153993755223608	0.4059948941555266	0.3901587665150819	0.1295981522498176	0.0060077733077785
8	A-3	0	2D	0.21	0.0632911392405063	20.0	1200.0	1.504	1.15011	0.856021007033561	3.93946160354917	0.596227317596865	0.364448091410145	0.0096921824086448	0.0113760848202164	1.5424634555266392	0.0613228734156757	0.5737382088547589	0.1000105149574154	0.0914642781575816	0.4888127561379871	0.0050245923995404	0.0618780071184349	11.715030195104976	3.495586165494668	0.4975022025907926	0.95127904759515	0.0502184065120693	0.0511232611588807	1.962130592494548	0.1630118823947947	0.0673178415747871	0.4180183862782248	0.1575612634192071	0.4110335192516257	0.4106196822303563	0.1243773530975321	0.0054107966793266
8	B-1	0	2D	0.21	0.0632911392405063	20.0	1200.0	1.504	1.15011	1.46393097567141	4.07313878465593	0.873204942002224	0.411599849341231	0.0093728214157926	0.011123490451991	1.5431498899112526	0.0601088758769873	0.5867814352302321	0.1000006640842199	0.0899201910978419	0.4944309186268979	0.0049896349978001	0.0616897347395341	11.76357664773732	3.43520878812552	0.498688137549594	0.9514703538389268	0.0503607203402932	0.0508908096440722	1.9618174915920616	0.1630650681057894	0.0676607271732509	0.4105258483237949	0.1567934129755988	0.4113916713525641	0.4062497253333526	0.1237040348355974	0.005228670370367
8	B-2	0	2D	0.21	0.0632911392405063	20.0	1200.0	1.504	1.15011	1.53269100858331	4.16847212164997	0.879662382377739	0.417985954015367	0.0093542137293449	0.0112007075160254	1.5436893033478187	0.0599316635842316	0.5973970063232451	0.1000014054718808	0.0901633083377653	0.4989130615564392	0.0050472960573072	0.0620404621957446	11.691821500330956	3.24134585424312	0.4994124982166626	0.9511870555569129	0.0510730109833605	0.0509857217202287	1.9622582468453704	0.1638372097556427	0.0676994036102888	0.3982908925584952	0.1554981905661443	0.410424193445572	0.3989727799055897	0.1242268914319988	0.004990576598163
8	B-3	0	2D	0.21	0.0632911392405063	20.0	1200.0	1.504	1.15011	0.713326874944098	4.08847024162233	0.723119393554832	0.241278006740254	0.0094653538964973	0.0114741585994839	1.5443851940368074	0.0603205842663649	0.6122271100428541	0.101424943740547	0.0921745233421974	0.5050432422858543	0.0050723380876566	0.0620189039079577	11.626886858917846	3.435478225553461	0.4982119478615777	0.9509278194095352	0.0508690097877359	0.0509899093966945	1.9623296078828896	0.1637457081849811	0.0675830798467116	0.4023766849298437	0.1554604752966056	0.4096135287962249	0.4014226298150641	0.1244829719041361	0.0053874557769162
9	A-1	0	2D	0.64	0.7777777777777778	20.0	1200.0	9.259	9.06968	9.3292551342751	17.8892834623454	0.856429512704516	0.608923030059006	0.1480398874071409	0.1554019868453511	1.5210741577004423	0.0680999549212155	0.4497305122771598	0.114731480525229	0.3015852317130952	0.4284247309355314	0.0057551180331859	0.182293084720164	31.074951524712382	5.813440793241645	0.3537721962958947	0.9810575874273434	0.2192895379517528	0.1775887371363263	1.9774190366978264	0.1868453065958401	0.0647454626027119	0.2098367974827812	0.1664268890521	0.3446425719910101	0.2591099813382373	0.5152838087018415	0.0533610557158136
9	A-2	0	2D	0.64	0.7777777777777778	20.0	1200.0	9.259	9.06968	8.93062298423998	17.5906098608834	0.856052314027773	0.593062622129988	0.1463385045795923	0.1561923755659481	1.521974988549611	0.0681678534492281	0.467336146523189	0.1162737317406498	0.2988504111628582	0.4378528245722029	0.0058720364645365	0.1796692389350551	29.99743242742878	5.927593314917557	0.3437698270130226	0.9803905114776188	0.2254706831052519	0.1867823897624917	1.9777889315969548	0.1879419406420909	0.0651442050009552	0.2284109809313876	0.1685053818985196	0.3573797618241192	0.2757218170558093	0.522644004263495	0.0569407896450709
9	A-3	0	2D	0.64	0.7777777777777778	20.0	1200.0	9.259	9.06968	9.29181238706319	17.9581302758448	0.856386533401483	0.604184368602595	0.154634205844672	0.1708230517466067	1.5220054211159535	0.0685006571754633	0.504691234474966	0.1171701347856967	0.2975949127247832	0.4568618078288944	0.0068482400559638	0.1945034627628085	27.80196330346569	6.982357837289995	0.3388491215543216	0.9788746998371488	0.2439047032650351	0.2086854878549683	1.9781447648078887	0.1909311422210878	0.0648933756308613	0.2556025573160169	0.1727400488580709	0.3635559657208952	0.2987398239175787	0.5740120023643837	0.0637046665752843
9	B-1	0	2D	0.64	0.7777777777777778	20.0	1200.0	9.259	9.06968	8.79571665209959	17.3378276574993	0.855985661332238	0.592666062150968	0.1430485796875422	0.1510982627511596	1.522055924208917	0.0680632250165028	0.4562723732119546	0.1150352837458096	0.295250224717854	0.4319646946975462	0.0056144013958483	0.1776012590484727	31.03316024746665	5.564314205880836	0.347037819558471	0.9810325621813883	0.2226492755422796	0.1830638914053927	1.977625811313628	0.189378980476554	0.065134759432928	0.2222074424429469	0.1685190172110777	0.3577119557236749	0.270257152845422	0.5117634132050252	0.0530552018609079
9	B-2	0	2D	0.64	0.7777777777777778	20.0	1200.0	9.259	9.06968	8.51627785035364	17.2094700700969	0.856197258429872	0.577974252519571	0.1486314862903391	0.1633154411312338	1.5225728653941866	0.0686568787195288	0.4987943753197141	0.1171042031959092	0.2930661788575694	0.4539469681709836	0.0065174347829027	0.1882748535890121	28.28787688108756	6.803939210034884	0.3378553279108622	0.979230041637542	0.2403767522881841	0.2056744219654872	1.9784025877725653	0.1923019713221512	0.0651152348623575	0.255633583562637	0.1733755920224589	0.3690784932315683	0.2987652524089165	0.5572647166857332	0.0608153013815324
9	B-3	0	2D	0.64	0.7777777777777778	20.0	1200.0	9.259	9.06968	9.55438204593208	18.4038246892957	0.854695175426494	0.607411853902789	0.1529273235275649	0.1666678181856033	1.5214801027654477	0.068283452747763	0.4898498341636228	0.1169760361247513	0.3005492317934719	0.4494654390066	0.006401221967476	0.187383522133934	28.67308615230197	6.319093573406781	0.3379055071411118	0.9795033568760628	0.2375658227787957	0.2004928093728241	1.977981146656296	0.190263419877978	0.065140296923269	0.2439463514897456	0.1709491608440739	0.3615452610654163	0.2890543350997705	0.5545441496923615	0.0592038943870994
10	B-2	0	2D	0.78	0.3181818181818182	20.0	1200.0	1.03	0.0	0.267708262033746	1.99942810942751	0.450591282980659	0.297148262693096	0.0960011164890546	0.0739339687286222	1.5708133708361482	0.0851471683606955	0.1701365508290904	0.1	0.1150423707906765	0.2209173823082801	0.0077673797971354	0.1328935834702978	16.509190865021022	3.664259753815409e-12	0.2067844208581364	0.9649311294301663	0.3878698092863712	0.4358397383000526	1.9860374889687065	0.221607231370047	0.0648621678685655	0.5236753360668617	0.1763469509955181	0.6781732083511869	0.4660379375237098	0.6426672904989728	0.3234500218227804
10	B-3	0	2D	0.78	0.3181818181818182	20.0	1200.0	1.03	0.0	0.494435628551498	1.92401255063528	0.925605980363932	0.277635953130151	0.0922899231232135	0.0553739538739315	1.5764863343750133	0.0742813697075244	3.676758670603274e-14	0.2499988461825781	0.0797142384089778	6.12793111767175e-14	6.921335001900513e-16	3.5021949855213966e-14	49.999992408397176	49.774511045400885	5.0416267306136336e-14	0.9881422907110864	0.3999444275507285	0.6392817936956544	1.9928878206343743	0.2828057639812262	0.0650217509589119	0.9984265554358012	0.2499999999999855	0.9202857615909718	0.6246308609178395	0.6946557475696209	655039.4357432388
10	A-3	0	2D	0.78	0.3181818181818182	20.0	1200.0	1.03	0.0	0.499379166161994	1.93791412468973	0.930261641213412	0.277007021937499	0.0818431753219238	0.0714221353403979	1.5637875757598791	0.0835241673088757	0.2726706296458374	0.1	0.113227607229823	0.3124553759263073	0.0075714256812262	0.1182018154413254	15.011566489309027	4.322298247216448e-14	0.1873888069693752	0.9615669573959226	0.3894787157999012	0.4411598049451757	1.9863537580721529	0.2249327150464652	0.0653736731552868	0.5326929740926487	0.1779733036330453	0.6993835858008017	0.4702889364343113	0.6307837557268989	0.2394310857910709
10	A-2	0	2D	0.78	0.3181818181818182	20.0	1200.0	1.03	0.0	0.528977416823567	2.03466111247585	0.930230382629726	0.279482440338483	0.0867180183337111	0.0729427230469193	1.5653391556543732	0.0844501860847667	0.2411484077763249	0.1	0.1150442391282221	0.2866894896868785	0.00758275093907	0.1211619359489553	15.378625293449929	1.1816486431557876e-15	0.1910949050199828	0.9624498360164968	0.3897104471136864	0.4399359813670145	1.9861019811156544	0.2250866091243434	0.0653297320595727	0.5288791065913516	0.1781447936433757	0.693860855851795	0.4684993313307934	0.6340406403628892	0.2594224318282955
10	A-1	0	2D	0.78	0.3181818181818182	20.0	1200.0	1.03	0.0	0.520944040231507	2.08248996444818	0.921034861810658	0.271601452296584	0.0543685177039237	0.0697873366962033	1.5348959666083202	0.0776496011353176	0.6835982962832697	0.1	0.1171510679690665	0.5325640414627121	0.0066485444274663	0.0732173005212943	10.412530835895549	3.6544770734288176e-21	0.122908902330247	0.9455166111277268	0.3910407635175391	0.4526991656247481	1.9869320111348217	0.2433586173091958	0.0673878975932193	0.5576776844249475	0.1870820980010144	0.7599400297006864	0.4817210281650738	0.5957038028422458	0.1314976925070438
10	B-1	0	2D	0.78	0.3181818181818182	20.0	1200.0	1.03	0.0	0.512755056460969	1.96360216117512	0.932267155967142	0.280101907378674	0.0744495196483981	0.0706300824920067	1.5580588673780924	0.0822225641720885	0.3486976252576316	0.1	0.1132766821727501	0.3675540192934899	0.007411011609127	0.1088906274314927	14.093085529293726	1.3403718277499905e-23	0.1746390285831039	0.9591644655709808	0.3899799455354204	0.4439975741333539	1.9865133774828367	0.2280258084934891	0.0657516723797551	0.5385138626135513	0.1797792440639941	0.712084289244146	0.472997194234727	0.6235182840568533	0.2015752830712128
11	B-3	0	2D	0.07	0.6344086021505376	20.0	1200.0	0.5910000000000001	0.3568199999999999	0.3102040139361	2.7586547429106	0.37007047298405	0.30385446873955	0.1390464642296018	0.1701396164665186	1.4838793492262152	0.0655266964495588	0.6236169931338488	0.1801596294848622	0.7190158930098715	0.5096504842881278	0.0010493787025802	0.0007897066619543	0.1525468737002046	32.01107967345321	0.0033373276168909	0.2027074711640824	0.062729359618093	0.0656991271194032	1.9694391871367032	0.1340960747493693	0.0877991466381085	0.4473425445340213	0.1250427247057838	0.2776467793732377	0.4271215247281401	0.2366284502478761	0.1021452693237641
11	B-1	0	2D	0.07	0.6344086021505376	20.0	1200.0	0.5910000000000001	0.3568199999999999	0.317356730868476	2.74633953681803	0.377026301728547	0.30649390082703	0.1380460839721541	0.1683644021088322	1.4844734330193368	0.0656374079658013	0.6196246156667059	0.1800755121273172	0.7187174351507927	0.5080453507639227	0.0010393818329693	0.0008555812929143	0.2231636014553554	32.01721248432825	0.003652323084359	0.2711047974677229	0.0620061428420009	0.0650367548858226	1.969480884766132	0.1315275678851822	0.0881734482776875	0.4488759968757304	0.1252329546133578	0.2776302417648483	0.4279590706745029	0.2342567382875693	0.0978371768188066
11	A-2	0	2D	0.07	0.6344086021505376	20.0	1200.0	0.5910000000000001	0.3568199999999999	0.243789620509123	2.7646765568367	0.29658089757723	0.297322452308053	0.1372039142118136	0.1681433480356774	1.4841507668025218	0.0655123604113738	0.6254996440998027	0.1795654192547004	0.714910263019616	0.5104037745839305	0.0010865180495944	0.0010583575046397	0.3740818434031003	31.801358307776624	0.0044999142151624	0.3840353312573712	0.0627187202044963	0.0659933346392415	1.9683523698541951	0.1336344614416943	0.0882121434918678	0.452211116937148	0.1260518653355582	0.2805898227652215	0.4297722288408021	0.2351950401795586	0.1044596106152689
11	A-3	0	2D	0.07	0.6344086021505376	20.0	1200.0	0.5910000000000001	0.3568199999999999	0.384261847676422	2.72031658564555	0.395182564460697	0.357445671311559	0.137093305938231	0.1677105658196952	1.4838969914289866	0.0655880942136961	0.6233315454166609	0.1790736601521262	0.7149803432504865	0.5095360679220916	0.0010666958669064	0.0008212761738546	0.169925336109527	31.968666307020506	0.003501248223784	0.2207036554585521	0.0626793120010019	0.0660348386192896	1.9683202327484828	0.1355827931104272	0.0880748791221647	0.453534834878756	0.1265784150486971	0.2815184085257293	0.4304886937421013	0.2345666806128395	0.1047375085546318
11	A-1	0	2D	0.07	0.6344086021505376	20.0	1200.0	0.5910000000000001	0.3568199999999999	0.313405033305148	2.86318630802686	0.297305008467297	0.368174862195173	0.1388752799869333	0.1715224404722988	1.484318614270672	0.0656259206916622	0.6350825898492319	0.1812352138785656	0.7180589437168953	0.5142025278866227	0.0010928253571168	0.0007801514878988	0.1138848699092645	31.85297131522009	0.0032660143582222	0.1595283423274392	0.0633302542945714	0.0665669910637886	1.96975876497868	0.1343696017280626	0.087970515175404	0.4511088547688754	0.1255179149182682	0.2786750419248825	0.4291742503378189	0.2388695830239863	0.0982336123466489
11	B-2	0	2D	0.07	0.6344086021505376	20.0	1200.0	0.5910000000000001	0.3568199999999999	0.0069858354715205	2.36539798475407	0.0337006840824895	0.0876345607036151	0.1389821704961592	0.1694673472780344	1.4840132477333263	0.0655861189559793	0.6193459540388863	0.1799744263538225	0.7178969833160532	0.5079329225536059	0.0010426659043274	0.0007473401844301	0.1167590129574296	31.9725057117854	0.0031658798732065	0.1628985626224198	0.0628673545660609	0.0658461279699171	1.96966921265666	0.1316512235224563	0.088160717104631	0.447381879266545	0.1251332511617049	0.2789371368107403	0.4271430393466758	0.2360608154323817	0.1044987967174319
12	B-3	0	2D	0.35	0.4923076923076923	20.0	1200.0	8.136000000000001	7.81553	8.77772104232235	14.8399322361405	0.822043329168476	0.719540340784879	0.1081978318684882	0.1596638805510119	1.5040972192099722	0.066535527500372	0.8756661736538245	0.1717260118340058	0.4570742082902675	0.5934039752945142	0.004402677808117	0.0506252154418531	10.898732736817005	11.034274156208978	0.1449262048983976	0.947820336924703	0.1484586058625292	0.1390280994539113	1.9657480668768856	0.194992386490119	0.0752628030433456	0.3364771994602291	0.1538307741132549	0.3979995868113349	0.359301005570845	0.3493171954467764	0.064662720828185
12	B-2	0	2D	0.35	0.4923076923076923	20.0	1200.0	8.136000000000001	7.81553	6.72936229541297	14.9573232937844	0.812405752818002	0.553792461512198	0.108742587236173	0.1643743155312381	1.5051496610656112	0.0665619897060286	0.9115909940071704	0.1731203132081246	0.4551696932344942	0.6030672302370479	0.004687131727976	0.0513299688523153	10.351253737107932	10.949806103647203	0.1421380591045222	0.9452117525167992	0.1541401749283693	0.1454232642525896	1.9661709138554369	0.1960309605892852	0.0752544143036481	0.3434481589252734	0.1541774473463291	0.4026922476609836	0.3640350088938766	0.3611275486361431	0.0628486359459764
12	B-1	0	2D	0.35	0.4923076923076923	20.0	1200.0	8.136000000000001	7.81553	8.05767873072815	14.5689902525269	0.81936562511204	0.674998417737182	0.1138216379004403	0.1312883596863285	1.5046857903655009	0.0676403204056972	0.5534569534236223	0.1526209328110381	0.4619397147159817	0.4798245411594115	0.0021657503514066	0.0598536003495006	27.03642647483657	16.948790292363565	0.2105956319069758	0.978289523048636	0.1175377425911322	0.0930690647015647	1.9654281355911445	0.1763230464018467	0.0714071677151934	0.1918228021897234	0.1398817391816867	0.3274646533770425	0.2422547085777937	0.2842110247373939	0.130763744302183
12	A-1	0	2D	0.35	0.4923076923076923	20.0	1200.0	8.136000000000001	7.81553	8.45898814532312	14.333568371133	0.822610161427574	0.717414291715152	0.1081894577263818	0.150632313849343	1.5045158186695156	0.0667559033373191	0.7923012187592432	0.167260999893538	0.4537468523024083	0.5690587698151315	0.0039992511976562	0.0517184768059163	12.332040086960692	10.482757508181283	0.1557905834204377	0.9536036080954484	0.1421508843901514	0.1296235538167796	1.965373684816972	0.1918750089190797	0.0746673804569353	0.3118730029213961	0.1517464660133958	0.390462564277154	0.3420136377787683	0.331974344472039	0.0664493560955287
12	A-2	0	2D	0.35	0.4923076923076923	20.0	1200.0	8.136000000000001	7.81553	8.44743493706489	15.1810472612812	0.821670052190441	0.677213590187634	0.115362380435722	0.1305915442885517	1.5050394923288584	0.0675111193807632	0.5320115257270989	0.1497461266410101	0.4587645450840709	0.4699700609367772	0.0020730429359644	0.0609153682749337	28.784518389915966	16.992162817184663	0.2139940328259714	0.9795810844323416	0.119865182072086	0.0931522784919613	1.9656608384386145	0.1762779374794577	0.0714055109736109	0.177142093155461	0.1378140578692056	0.3272414220899576	0.2279404174804172	0.2846591910554468	0.1484257646541185
12	A-3	0	2D	0.35	0.4923076923076923	20.0	1200.0	8.136000000000001	7.81553	6.42201066254312	14.8164591529922	0.808760075625662	0.535928545830555	0.1090454803298571	0.1541105797845036	1.5043211347118317	0.066602358059691	0.813268842673047	0.1684664508520031	0.4532650795121837	0.5754523259246528	0.0041470826509392	0.0507948190110636	11.64832569940694	10.028364329408785	0.1493960876018444	0.9510137128351304	0.1473107655331838	0.1350956000688537	1.9658230993111945	0.193970192111228	0.0748987059365472	0.3170789356764398	0.1522258653987761	0.3973388328859721	0.345748793633082	0.340000998864421	0.0693746829108491
13	A-1	0	2D	0.5	0.2	20.0	1200.0	1.69	6.14981	6.28637761238649	12.8768993492776	0.931176824912879	0.52427241187589	0.0396665839921355	0.0407983057187146	1.535589263432394	0.0640009611076628	0.4285308592946511	0.1016953491598268	0.1634754700251093	0.4166436577202266	0.00560714602957	0.1179330311217188	20.43263059313664	2.4449892137613114	0.4725479981210412	0.9714728979172108	0.127180789516513	0.0908370278350016	1.9681367484529189	0.1740278454294195	0.0655759799947933	0.1142354453084084	0.1331387686202615	0.3639765318538495	0.1599408795219919	0.2495683646754351	0.008205788601831
13	A-2	0	2D	0.5	0.2	20.0	1200.0	1.69	6.14981	0.0048369484831142	3.04457696407211	0.0067181624096089	0.236479776473382	0.0423109061139792	0.0253865436683875	1.5573056502833809	0.0671604217860056	2.289391699871789e-23	0.100000009539605	0.1284335744456081	3.815652833119649e-23	3.5871315776904954e-15	1.745472328107549e-13	48.05927804163061	47.08487540046129	8.830554214983798e-13	0.987669360825973	0.1234807467290816	0.172276285369485	1.9783188866338104	0.2396031752809651	0.0641328193258582	0.7951671813862723	0.25	0.8715664255535087	0.5699440124417023	0.1976628290380472	116169.59846378506
13	B-1	0	2D	0.5	0.2	20.0	1200.0	1.69	6.14981	6.27494490525595	12.8549964089824	0.929686563760109	0.525050894821005	0.039374438658298	0.0393509574893101	1.535541225206953	0.0639787010529804	0.3994036443492789	0.1002995043159173	0.1619283882150315	0.3996419730982014	0.0053973416768744	0.1157000107291393	20.836480707691788	2.171345696408294	0.4761031865341739	0.9720103309782232	0.1240749566828872	0.0879636008949932	1.96773179211106	0.1719612399214264	0.0655708673783416	0.108955322223581	0.1317339430971302	0.3619684252507945	0.1536843279233048	0.2430145691134427	0.0138495573652082
13	B-2	0	2D	0.5	0.2	20.0	1200.0	1.69	6.14981	5.79047761242726	12.9113139055795	0.92299706928206	0.485896336672131	0.0416722429972961	0.0435896710396036	1.5360331086157473	0.0647863689359055	0.446012115124974	0.1016291255308793	0.1649253657327017	0.4263928769808617	0.0060939290511626	0.1212308286534162	19.29370529843752	2.72785837289343	0.4586875348423132	0.9698397060276586	0.13422601153737	0.0994788750329419	1.969783031690959	0.1807361154717641	0.0653584895520346	0.1411296357058625	0.1397736257032709	0.3763870994249852	0.1904250334982876	0.2642993747259617	0.0095005970774048
13	B-3	0	2D	0.5	0.2	20.0	1200.0	1.69	6.14981	6.2474234697658	12.8446748022418	0.928357170264279	0.523917295169757	0.0407892313628462	0.0411271492937201	1.535537286179118	0.0642950567539642	0.4082844888119588	0.1000000000001249	0.1647051677151697	0.4049298519835728	0.0057440376507357	0.1169198104799717	19.75498678616709	2.3499064934948333	0.4682380696215689	0.9705231938343604	0.1266894153222266	0.0916546729330775	1.9688152821701008	0.1753143451302881	0.0654249590480971	0.1234595936839682	0.1351692838700414	0.3670567626632614	0.1706516780782364	0.2497016327067695	0.0080602877950469
13	A-3	0	2D	0.5	0.2	20.0	1200.0	1.69	6.14981	0.0	0.0334284239652582	3.67087023515585e-05	0.0	0.0169664887874055	0.016064547535188	1.462324531518856	0.0851950932667672	0.3468398403748072	0.1000000000000972	0.7151717906132704	0.3663131034257181	0.0009124885929133	0.0005474931580055	2.474051355060424e-09	49.99999999999999	0.0243736501947334	4.123418908098124e-09	0.009750768281162	0.0058504609686972	2.0441562132358406	1.4990381743257446	0.0899999999993975	5.075441773204887e-16	0.1000000015052586	0.2604545591919961	8.459069622008137e-16	0.0224625016618908	0.0434854717810376
14	B-2	0	2D	0.92	0.75	20.0	1200.0	0.961	0.0	0.218434656307395	0.863594004415081	0.971045211435575	0.260478854973398	0.0831824730399578	0.0499094842703722	1.5907115661992222	0.0724796904373259	5.366485516800685e-09	0.1000000001379881	0.0575281135965446	8.944142448003458e-09	0.010193095907423	0.2756861450856757	26.44636035896708	1.8090352915578502e-09	0.3177693399027372	0.977815869047198	0.4315386653212534	0.5419712201394312	1.993422631821828	0.1813149673287366	0.0633882022939968	0.6559041951338654	0.1717941520685889	0.6247025465007183	0.5222565524306999	0.8675668494954791	72842.06952169066
14	B-3	0	2D	0.92	0.75	20.0	1200.0	0.961	0.0	0.221002142018533	0.870882471689207	0.975585873528281	0.260118613442845	0.0761338337232164	0.0456803002657677	1.5932380290242796	0.0689756809549902	4.1818243441674817e-10	0.100000004015395	0.0512361023366951	6.969707235421452e-10	0.0110897000886891	0.3188544136608076	28.15230268724935	6.3895651586577405e-09	0.3576346318606559	0.979132106164628	0.4195454481547685	0.5270299871816825	1.9945209888381576	0.1742819117334492	0.0619872602906528	0.6561928379860849	0.1695859508322462	0.5911292658026488	0.522366326366011	0.8915647011082578	1522633.922992854
14	B-1	0	2D	0.92	0.75	20.0	1200.0	0.961	0.0	0.0	0.421221811810822	0.0007142749224796	0.0	0.0946984992175335	0.0568190995416809	1.5913783522766578	0.0771208345926057	1.1785592124241418e-10	0.1000000000391182	0.0724467399438156	1.9642653536544024e-10	0.0081810914430931	0.1871857485094603	22.2802904614262	5.196742906687327e-14	0.2386696965076925	0.9737765566826374	0.4357734870201695	0.5402830244707364	1.992996563807328	0.1935589213081267	0.0646021851932261	0.6398253692880811	0.1718777415656832	0.6888835635484919	0.5160608785215248	0.7842878725218776	1016590.6005514103
14	A-2	0	2D	0.92	0.75	20.0	1200.0	0.961	0.0	0.225529223790971	0.902836272998858	0.975706920076205	0.256020322746124	0.0805184583986977	0.0483110750392186	1.59194775828408	0.0701211433405482	4.960155477122753e-20	0.1001172854738813	0.0550211544473713	8.266925795204594e-20	0.0106842127636462	0.3052607315890674	27.971195495819483	1.1630375313017016e-14	0.3476593689096119	0.9789998286880296	0.4192335906488315	0.5244736565113317	1.9936548788661763	0.1773712394927695	0.0624117260809598	0.6510296603371507	0.1701156975971582	0.5973194766430168	0.5203950641439621	0.8780454631396177	0.3245535771682326
14	A-3	0	2D	0.92	0.75	20.0	1200.0	0.961	0.0	0.22792497018202	0.902363706385325	0.972725271656507	0.259668989651913	0.0837365535527866	0.0502419321519194	1.5905454950956512	0.0715671689083817	2.4179950117542197e-10	0.1000000188980676	0.0591567307157444	4.02999168463295e-10	0.0097976979071677	0.266024785721575	26.551764449377213	7.202932560546222e-10	0.3132275360163195	0.9779019886122444	0.4266944927452243	0.5330353233995144	1.9930035934104904	0.1810969546606144	0.0632321921644868	0.6492200683681787	0.171224780872739	0.6276157332679361	0.5197003192689954	0.8493020412730089	88571.01914331193
14	A-1	0	2D	0.92	0.75	20.0	1200.0	0.961	0.0	0.242763110561178	0.966190062858097	0.966059266114333	0.26008562935115	0.088883655163259	0.0533301931074689	1.5903256393161993	0.0723143530388751	1.0703342219465464e-10	0.1000000027167445	0.0632579429073819	1.7838903695926846e-10	0.0096001563039772	0.2608474262481444	26.571164509069284	2.952141645253229e-12	0.30940581002381	0.9779177664689443	0.4258343622823652	0.5288816180519558	1.9926139307480373	0.1832096407383982	0.0632911106296015	0.6419890570063044	0.171549781163935	0.6273362470688081	0.516903956105505	0.8430592374075692	1528460.8408960665
15	B-3	0	4D	0.45	0.6363636363636364	21.5686274509804	2793.0	11.171	11.2672	11.8881414437207	19.718957436732	0.834425920516144	0.722507280228321	0.1522298729574153	0.1948194720536005	1.5066862594643444	0.0687363488958671	0.6797716260861576	0.155680727170469	0.4438020436072021	0.5311663520506851	0.0045751195057449	0.1427209648947598	30.59502446122873	16.95236714501667	0.3251207654872377	0.9807661635032304	0.1482177079280168	0.1014378752516401	1.9694203033050592	0.2159011867883384	0.0683347483079214	0.0843843199957204	0.1	0.2310771909055601	0.123299610365486	0.4389783122000005	0.0092230728385399
15	A-1	0	4D	0.45	0.6363636363636364	21.5686274509804	2793.0	11.171	11.2672	12.1978172238925	19.9995013690128	0.836382931815763	0.729218691459605	0.1542704283933409	0.1972303956537331	1.5069823021318016	0.068642867489933	0.6784718219026256	0.1550625799480978	0.4416846374312611	0.5306896955248663	0.0047205750521555	0.1464006317408216	30.413304549404845	16.492321696092247	0.3278546886032596	0.98065346441737	0.1506100665996076	0.1029101898883938	1.9697374210018672	0.2158216046709551	0.0680355508142189	0.0832889209323404	0.1	0.2304606739654793	0.1218941481133538	0.4465412172829487	0.0096495123842839
15	B-1	0	4D	0.45	0.6363636363636364	21.5686274509804	2793.0	11.171	11.2672	8.61589217508019	19.6891012492303	0.819886542264405	0.533728759592056	0.152778567339565	0.1959570869756074	1.5071449729292796	0.0687076546151219	0.6826215770178937	0.1556269877608382	0.4422322840038286	0.5322080879108512	0.0046640982662347	0.1449396533443428	30.47560027060712	16.55788345630936	0.3270970952388705	0.9806922474618291	0.1494792590191258	0.1022122186223392	1.9697509099121453	0.2153707547044284	0.0682045215217534	0.0837886359154428	0.1	0.2306706207573008	0.1225358707567116	0.4431089589422895	0.0094637177697525
15	A-3	0	4D	0.45	0.6363636363636364	21.5686274509804	2793.0	11.171	11.2672	11.489217646804	19.826208262893	0.831446291162122	0.696974023919871	0.1534995027065525	0.1968072700472516	1.5065301117587562	0.0687582205829332	0.6821362061575619	0.1555679850262982	0.4430818836408697	0.5320309986423815	0.0046606179372436	0.1439496757512539	30.28639268216596	16.566033850962622	0.3240809827098595	0.9805739697032848	0.1508893573237846	0.1034211560684835	1.969673699237412	0.2178133022931609	0.0682954212906016	0.0854105412256354	0.1	0.2328371336492707	0.1246122376129586	0.4441781018669891	0.0094345791084285
15	A-2	0	4D	0.45	0.6363636363636364	21.5686274509804	2793.0	11.171	11.2672	11.2478615724093	19.8935304559659	0.831785072048863	0.679746496468163	0.1553724891402013	0.1982576290768413	1.5067539291455656	0.0686513260258203	0.6760150151031072	0.1546544932454672	0.4425124057694941	0.52978609742181	0.0047587648046565	0.1463950712186533	30.163249966756684	16.32345353572774	0.3267548162429323	0.9804962089295388	0.1511815268310672	0.1033745786958975	1.9698658144013288	0.2159113394596688	0.0680578567631581	0.0837778454996689	0.1	0.2307327779875735	0.122522023857688	0.4480272789913923	0.0100242327107045
15	B-2	0	4D	0.45	0.6363636363636364	21.5686274509804	2793.0	11.171	11.2672	12.1642607740174	20.0662691243138	0.835686147316919	0.72539721866518	0.1242420481699534	0.1969181386449236	1.5082714617680626	0.0629891337650429	0.984955669561685	0.1718588216798301	0.4074890234613971	0.6214405162726548	5.852354669706144e-15	1.5505140023265527e-14	2.0493848883639294	23.49565949647689	3.208528381484156e-14	0.7735323385306553	0.3289160577831384	0.2863295743172688	1.9759786124718857	0.3406346621234121	0.0819963415646319	0.2705247662491816	0.1673034384754407	0.5925109765385708	0.3107605627520376	0.4832477129622079	7914.812409581229
16	B-3	0	4D	0.69	0.0	20.560747663551407	1250.0	-0.49	2.75276	0.0	0.199028913158925	0.000202794991132	0.0	0.0149879867810948	0.0141990833115235	1.4619253463525452	0.0851950932667672	0.3473642804004597	0.1	0.6977643695922303	0.3666638985519125	0.0012584891863238	0.0007550935285072	1.3280167396458952e-08	28.83863609370023	0.0371064348551598	2.2133611837534813e-08	0.00899203153695	0.0053952189306667	2.0999999999999943	0.8120782602118093	0.0899999999999999	9.449123242303795e-10	0.2499999999998748	0.2651291955526099	1.5748538712371351e-09	0.0203493957706974	1014.0029640260065
16	A-1	0	4D	0.69	0.0	20.560747663551407	1250.0	-0.49	2.75276	2.60057021812727	8.02331348321231	0.9786332893191	0.33120344001302	0.0275422679417349	0.01652536076595	1.5373104090778402	0.0651395033565432	3.3008372022723066e-11	0.1000000057207589	0.0218016085669679	5.5013953368178575e-11	0.0085396292335087	0.3168081404088037	36.49858259017565	3.5712296993065375e-08	0.4179592304122776	0.9838268753653442	0.3725204740327445	0.424654640626307	1.9821378565891827	0.2485232513200323	0.0625393532274796	0.5399498020314983	0.2164364472025618	0.5602391610207544	0.4736610340817261	0.7579881418010608	0.1477127668723711
16	A-2	0	4D	0.69	0.0	20.560747663551407	1250.0	-0.49	2.75276	0.0051601705590888	3.12273801260422	0.0072788606591979	0.227020513170168	0.0296986182041265	0.017819170923111	1.5412928979758325	0.0666341119244683	2.1385268325032988e-11	0.1000000234823405	0.0241916829676842	3.5642113873784625e-11	0.0076672146130966	0.2830312487160628	36.31448107277515	1.457521696223865e-07	0.384249203761012	0.9837462160495462	0.3793598243355322	0.4357321053101743	1.9818220112052016	0.2549284367936292	0.0634921038584103	0.5485984475909671	0.2164644350238856	0.5915591132713037	0.4776242286776371	0.7365825249493481	707714.1065932662
16	A-3	0	4D	0.69	0.0	20.560747663551407	1250.0	-0.49	2.75276	0.0	0.203087806590569	0.0002042458351785	0.0	0.0146416617773661	0.0248053092844613	1.4515099323449094	0.0851950932667672	1.0941594240898729	0.1511723778556667	0.5736506486176415	0.6458420668867519	0.0016930995595204	0.0010158597357316	1.1463498255032472e-11	28.28381538277133	0.0234928978157137	1.910583042468908e-11	0.0220375792743457	0.0174199732050203	1.978269742769546	0.70112508445348	0.0899999999999999	0.1904667290431125	0.1	0.4028564535666449	0.240954770194666	0.0432411422252133	0.0280972102309491
16	B-1	0	4D	0.69	0.0	20.560747663551407	1250.0	-0.49	2.75276	2.88735858853749	8.52796925640302	0.978226236841401	0.346111309559362	0.0387667489771753	0.0232600493865215	1.552724825636196	0.0733469908351085	5.581228439861245e-12	0.1000000000001835	0.0335836331562118	9.302047399682218e-12	0.0060007276645806	0.2169547937183133	35.55474753151882	1.346490920566857e-13	0.3132465491642302	0.9834046690693404	0.3915467003402362	0.4523859031672887	1.981935032355645	0.2723094198030541	0.0649523684196028	0.5553817278352389	0.2159803764532528	0.6531698176795578	0.4806911122576088	0.6926007462721236	46821.634504446345
16	B-2	0	4D	0.69	0.0	20.560747663551407	1250.0	-0.49	2.75276	2.77034544042205	8.29964423726072	0.977619417497106	0.341432320578292	0.0323682583190819	0.0194209551816639	1.5452321299160472	0.0686684252297721	5.8765835185326514e-09	0.1	0.0270434695907531	9.794305768292656e-09	0.0069723109541195	0.255253523171046	36.009601156734206	7.806913940751186e-09	0.3554377643755708	0.9836108566867128	0.3846994459442429	0.4434639659948474	1.9814422631424824	0.2616979806623413	0.0641434153394795	0.5527543662205368	0.2165328551834309	0.6175187660336761	0.4795075017003125	0.7181384443475574	57017.03337421513
17	B-2	0	4D	0.26	0.8243243243243243	16.176470588235293	2279.0	3.835	1.58601	1.70525304522788	10.2331076763156	0.513612024897987	0.324448751087663	0.1638868946370134	0.219415587496117	1.4885933834460652	0.0661942259882902	0.7388232657778521	0.1810383281786905	0.6113154808126371	0.5518452544582859	0.0018705202545008	0.0527477525938935	27.599508915752573	20.09924770098377	0.1469609251862869	0.9787230337311004	0.1142882543545904	0.0867603161610013	1.970648936369676	0.3332934473932985	0.0760934489700776	0.1591358941560084	0.1	0.241723594001076	0.2096276771801608	0.358923656251012	0.0205533592076783
17	B-1	0	4D	0.26	0.8243243243243243	16.176470588235293	2279.0	3.835	1.58601	2.15195858025002	10.166218575504	0.558551920038543	0.378975309301121	0.1636128978887143	0.2184902171908836	1.488572801988231	0.0662071042518555	0.7354094940577093	0.1802249615661098	0.6116399814901089	0.5506996148598063	0.0019173639309783	0.0542173238469503	27.677012501890825	19.90727038151828	0.1517755960909703	0.978781351107728	0.1113870955809092	0.0845127581626638	1.9703822195665184	0.3285912431089282	0.0758282375219008	0.1587302435880069	0.1	0.2365844224189208	0.2092051093645319	0.3572202992004978	0.0204122384385567
17	B-3	0	4D	0.26	0.8243243243243243	16.176470588235293	2279.0	3.835	1.58601	1.52261534607061	9.92423781272085	0.453321455159557	0.338443958351384	0.1625795730891992	0.2177284474785178	1.4882649737871363	0.0661316330838014	0.7392115832353752	0.1817579135327115	0.613381102144093	0.551975201296817	0.0018959037006571	0.052557936397856	27.121838603743004	20.1764854761672	0.1480653783530829	0.9783564139241836	0.1113692614451658	0.0846780040342434	1.9708053675620008	0.333455829311009	0.0759341104822893	0.1603355085185318	0.1	0.2385535195028241	0.2108746819294761	0.3549643879106174	0.0202958741196473
17	A-2	0	4D	0.26	0.8243243243243243	16.176470588235293	2279.0	3.835	1.58601	0.738734712275757	9.90275377710123	0.243754080498269	0.306041717829858	0.1619581891157971	0.2156030382826905	1.4885249293202083	0.0662917175674498	0.7312265311174747	0.1799814749479993	0.6097835267854305	0.5492878289494872	0.0019651164538785	0.0556955983346515	27.74213627631381	20.58420136323567	0.157522169675543	0.9788301067304712	0.1083511471473776	0.0822744410603639	1.970149485926768	0.3234666330359117	0.0755904643047167	0.1593315181837019	0.1	0.2326943035390266	0.2098312981460564	0.3535730776777061	0.0200821286065407
17	A-1	0	4D	0.26	0.8243243243243243	16.176470588235293	2279.0	3.835	1.58601	0.296307599742991	9.23637515528009	0.122667556604469	0.261523976639151	0.1630431048758494	0.217277904622782	1.488510611607564	0.0662861618705533	0.7326408668936361	0.1799254101131336	0.6109478370112258	0.5497661711376224	0.0019405738069984	0.0549484383878994	27.71556222687079	20.13051026473347	0.1545054921185568	0.9788102388646688	0.1099370271659896	0.0834143376826354	1.970201887276963	0.3259298957548926	0.0756850769431983	0.1587465281982871	0.1	0.2345466708702172	0.2092220818133366	0.3556406806933168	0.0196781992778646
17	A-3	0	4D	0.26	0.8243243243243243	16.176470588235293	2279.0	3.835	1.58601	0.326155918223903	9.56337342506207	0.131844352577383	0.258673903744374	0.1639456813765946	0.2195099397399652	1.4885041946017248	0.0662985606647299	0.7389187070791803	0.1809401211617397	0.6113549429295441	0.5518771999915619	0.0019209444592136	0.0541479248676085	27.58817827235537	20.59307235234597	0.1508068452681691	0.9787144811487009	0.1124367045716851	0.0853969566196798	1.970439517777228	0.3305847728125821	0.0759089620618753	0.1595113797135	0.1	0.2378382118022869	0.210018419702507	0.3590548212272536	0.019781438200188
18	B-2	0	4D	0.92	0.25	15.602836879432626	1507.0	0.373	0.0	0.222732111290951	0.927812848637845	0.941244084911266	0.255046983474774	0.0042926252972956	0.0455018278760792	1.5588213677699432	0.0350322018696289	9.999999935877202	0.1	0.0625897980325515	0.94339622607268	1.518986668437914e-18	9.23272942956544e-19	0.0078216235472388	0.9490317657173292	1.2700032004417349e-18	0.0128682877413803	0.6344428250351632	0.6814829093556137	1.9942568466164905	0.3722333831021942	0.0720198293496765	0.4741439298613605	0.2277789656159187	0.9374102019674484	0.4414156396364481	0.726984737231693	1.661820157856459
18	A-1	0	4D	0.92	0.25	15.602836879432626	1507.0	0.373	0.0	0.0	0.225664873257159	0.0002724145943002	0.0	0.0346392985309641	0.0501807051072625	1.5315578853022422	0.0851950932667672	0.8486640098212702	0.1	0.105620121553033	0.5858252873459421	0.0050923227976434	0.1361206904315769	26.13056988739386	2.709016403652438e-29	0.286506214660287	0.9775537894430392	0.3172198217322465	0.288804146562495	1.976349979897261	0.2430817866779511	0.0779517522645729	0.3104227629453239	0.1422524772368645	0.6078736637866801	0.3409655113862379	0.4751055421013345	0.3368050883651693
18	A-3	0	4D	0.92	0.25	15.602836879432626	1507.0	0.373	0.0	0.212991737739486	0.879366850828806	0.946660181955196	0.255857738166256	0.0042367280324178	0.0449093161923848	1.5606228827142736	0.0353779411306093	9.999999775476692	0.1	0.0616480136737216	0.9433962252161447	6.117865486451143e-16	2.540644188017197e-14	40.92827801859658	36.88841141744629	3.4875985858253606e-14	0.9855520135043568	0.635257428654022	0.6835702164989755	1.9941318888972168	0.3717610204012853	0.0715991007655028	0.476052298903955	0.2269657035745693	0.9383519863262434	0.4424062839592947	0.7284795326913859	1092372.8951222417
18	B-3	0	4D	0.92	0.25	15.602836879432626	1507.0	0.373	0.0	0.227583468336887	0.932783735482866	0.947669410010953	0.257455921245759	0.0911084817618242	0.0546650890571248	1.5812644125365312	0.0807088399695785	3.325259891477532e-13	0.1	0.0778687020211403	5.54209981912615e-13	0.004960176385074	0.2509849250847482	49.99999999999999	5.247060136974326e-18	0.3575201409221013	0.9881422924901184	0.4348128343446958	0.3963661700020975	1.9978012356202868	0.2943830783974254	0.0648334752865544	0.3115788189634717	0.167830619540977	0.5646111570567582	0.3418012929674676	0.7020161841439705	0.3109101020515568
18	B-1	0	4D	0.92	0.25	15.602836879432626	1507.0	0.373	0.0	0.0	0.172450644515367	0.000210968172895	0.0	0.0151489874302563	0.0143662516390367	1.4601397256405568	0.0851950932667672	0.3483308178303527	0.1000000145345999	0.6212589131732601	0.3673093938118394	0.0013006259009948	0.0007803755405969	6.275218839618896e-31	28.89570878827344	0.0337468166644708	1.045869806603149e-30	0.0102644476729963	0.0079777921798519	2.016036406533819	0.8791157826307985	0.0899999999999999	0.1772256661057273	0.1	0.3449942701622689	0.2280234349358439	0.0231244193594856	0.009594703104296
18	A-2	0	4D	0.92	0.25	15.602836879432626	1507.0	0.373	0.0	0.0	0.340699590815677	0.0007956219902953	0.0	0.0828593643328895	0.0497156185997336	1.5772195623150589	0.0764482457388004	1.659493211303703e-34	0.2136564043915171	0.0682860477883874	2.765822018839505e-34	0.0053860363513998	0.2725334393808342	49.99999999999999	8.431325851553969e-47	0.3743337001461531	0.9881422924901184	0.4444905098082799	0.4058003783229964	1.9968514419033911	0.2942250694112579	0.0644951065952887	0.3129562259901306	0.1662244548313864	0.5573802520654596	0.3427943389626589	0.7280494363035642	0.3078862758049759
19	B-1	0	4D	0.16	0.6785714285714286	16.923076923076927	864.0	5.995	6.2508	6.25212654924592	13.7029600403408	0.811273789339433	0.562400792140793	0.1838390000030503	0.3020663893612248	1.4901473505041751	0.0649834367294965	1.043102874559875	0.2127095225927491	0.6647144979089178	0.6348372282163299	0.003097497365363	0.0183435761598985	5.322063522965692	7.2191839092798675	0.0403660964821867	0.8986839641835643	0.1755954897991019	0.1340203053868768	1.9815194660113329	0.4636126032549446	0.0820520052552442	0.1632331874822571	0.1	0.2949194056088956	0.2138706625438137	0.4544302709080002	0.0216232250830753
19	B-3	0	4D	0.16	0.6785714285714286	16.923076923076927	864.0	5.995	6.2508	4.88233727662874	13.6225889980493	0.792924132514587	0.451997973810892	0.1812837302688108	0.2977290902072603	1.4897843782618707	0.0650131373020266	1.0423376205122326	0.2129122161391296	0.6658833870685565	0.6346670791034643	0.0030145279686491	0.0172456688098842	5.120852149735431	7.851125480390242	0.0385706494161996	0.8951205197589754	0.1731787464060463	0.132144205037454	1.981501777336684	0.4651343815136426	0.0822940742807401	0.1630509388699467	0.1	0.2955459635152439	0.2136829018406292	0.4471189640545986	0.0214006941758658
19	B-2	0	4D	0.16	0.6785714285714286	16.923076923076927	864.0	5.995	6.2508	6.85183036215034	13.0503018811076	0.814548925915725	0.644568189952637	0.1788228404788389	0.2915149592955547	1.4894717692994737	0.0653949080654131	1.0301886186068672	0.2117720588456027	0.6638542214937756	0.6319444307538166	0.0030076589080136	0.0197949123295046	5.9815017377013895	8.592462500187809	0.0450780850004948	0.9088353959457358	0.1670042065425942	0.127815089634659	1.9812284331799936	0.4621665515208797	0.0818820296196645	0.1653405401022634	0.1000000000000373	0.2910676935057295	0.2160352567762462	0.4391249612597184	0.020443485336051
19	A-2	0	4D	0.16	0.6785714285714286	16.923076923076927	864.0	5.995	6.2508	6.40520036741739	13.2846012301751	0.810268687727752	0.59505230406424	0.1802277884774479	0.293804653134312	1.489434772457794	0.0654676152063547	1.0301850875292524	0.2124333933508598	0.6625317235602359	0.6319436335236177	0.0031460096107994	0.0215814628883164	6.259948175057254	8.360722301928076	0.0486663626726533	0.9125357823865788	0.167241541593663	0.1280713708966374	1.9811860869339988	0.4628944932243877	0.0817779974271986	0.1657868354730004	0.1000000000000043	0.2888019137671106	0.2164921461082568	0.4434574869192658	0.0196335585001324
19	A-1	0	4D	0.16	0.6785714285714286	16.923076923076927	864.0	5.995	6.2508	6.30053041932783	14.1845341611807	0.816247349732316	0.544177086304183	0.1847905032962246	0.3043836537310343	1.4908206900443426	0.0647790745772714	1.047182340550793	0.2116616535524627	0.6642390668774739	0.6357416023538907	0.0030713089617691	0.0182888581205958	5.354743839923267	7.4754897709867425	0.0399107307615597	0.8992399982049049	0.1778958376620786	0.1355716187772917	1.9812716642571533	0.460294257684186	0.0821414505490939	0.162084265483582	0.1	0.2958502023609665	0.2126854900759972	0.4582441306289219	0.021436431211484
19	A-3	0	4D	0.16	0.6785714285714286	16.923076923076927	864.0	5.995	6.2508	6.81280424102804	13.1260836853708	0.812186515336032	0.639050187601987	0.1783062863232524	0.2907441887882367	1.4889474077161404	0.0655351027857532	1.030588549531815	0.2133692701512724	0.6643656078056059	0.6320347029468127	0.0030660992617494	0.0206714808418526	6.141947692214671	8.429624495197002	0.0472354099009769	0.9110049458418586	0.1646464640025569	0.126211121059095	1.9812740988878164	0.4654361192236851	0.0818836115126248	0.1665583456267542	0.1	0.288398982293417	0.217280715260588	0.4376267906891844	0.0199266506677686
20	B-1	0	4D	0.54	0.4347826086956521	18.48739495798319	1636.0	7.324999999999998	8.772680000000001	8.62240339385074	17.2886455045987	0.86968077143456	0.573465769644459	0.1277574246536451	0.1241175300120422	1.5187648262995943	0.0716741644381494	0.3715093298767509	0.1085510300617067	0.2947514127386226	0.3824042841913643	0.0075385864329577	0.2290254263339298	29.78042056965228	8.286499931941028	0.5438842358403486	0.9802504379877032	0.1132487912683543	0.0679492747610125	1.9723306192368528	0.118428989715673	0.0566076582430441	6.933422195086136e-31	0.2499999795872873	0.1613643514210289	1.1555703658476891e-30	0.4210922311069847	0.0133804059845637
20	B-3	0	4D	0.54	0.4347826086956521	18.48739495798319	1636.0	7.324999999999998	8.772680000000001	8.83124866739379	17.3944583748789	0.869708677858696	0.583764122079826	0.1281982898450738	0.1243197776868925	1.5190254384109458	0.0717625445863312	0.3697459914413177	0.1087416495599126	0.2951583855359413	0.3812812785044569	0.0075143800308752	0.2287365410561891	29.83984202507079	8.409889151036085	0.5430632955382007	0.9802889910037696	0.1135675263915367	0.0681405158349222	1.9721926447356029	0.1188258110562772	0.0566188235910273	1.7844911371170768e-15	0.1000000207578165	0.1617783189258581	2.97415189519512e-15	0.4211968345780038	0.0128305130895031
20	B-2	0	4D	0.54	0.4347826086956521	18.48739495798319	1636.0	7.324999999999998	8.772680000000001	8.63805726357563	17.256012492033	0.868942838907164	0.576082156676657	0.1254224632667624	0.1225702886828978	1.5191778213551594	0.0715510797716662	0.3772594596727203	0.1102144247547418	0.2944344220761165	0.3860381763908049	0.0073213816589607	0.2230102664913737	29.860134012878103	8.196103412956045	0.5357081201081489	0.9803021221198064	0.1163160421477078	0.0707100667531173	1.9724432739086768	0.1270489953486283	0.0572796237190698	0.0079132804684308	0.1	0.1698574578157345	0.0130171205707715	0.4162906219273889	0.0248790365551793
20	A-3	0	4D	0.54	0.4347826086956521	18.48739495798319	1636.0	7.324999999999998	8.772680000000001	8.91275081109051	17.1013527041834	0.867444681418619	0.600813263705977	0.1283850869665326	0.125694468669214	1.5185899188149632	0.0716035628750639	0.3790425947367236	0.1102728014238423	0.2978141019751712	0.3871563880615968	0.0074577030088019	0.2245835243901201	29.51430250374104	8.249707736442959	0.5321168174128601	0.9800759124364422	0.1176915759210282	0.0717788129669068	1.9724526790138668	0.1282397185234622	0.0573657010756417	0.0098891310204808	0.1	0.1700690806119687	0.0162146372471568	0.4220568060262409	0.0234288464022533
20	A-1	0	4D	0.54	0.4347826086956521	18.48739495798319	1636.0	7.324999999999998	8.772680000000001	0.0	0.490382468282486	0.0007244749776686	0.0	0.0392645945162596	0.0309070183526459	1.5201207952495008	0.0851950932667672	0.1871472692745416	0.1	0.3318327643988227	0.2377538188591089	0.0016834129504663	0.0467757122025484	27.186237589291743	22.28548698578752	0.5022067709603766	0.9784065763465858	0.0229882824319942	0.0154576150301482	1.958222145799896	0.0327070314711277	0.0637613772430873	0.0724127857692783	0.1	0.1659604646408007	0.1076909709360062	0.0931403455853425	0.0438085800711198
20	A-2	0	4D	0.54	0.4347826086956521	18.48739495798319	1636.0	7.324999999999998	8.772680000000001	8.85892316563736	17.3692852234458	0.867580229146043	0.587880888189415	0.12927987130633	0.1243787260670649	1.5190619833471524	0.0714760917262588	0.3620888759422438	0.1077138495961513	0.2968721896245681	0.3763569925778673	0.0075256288112063	0.2275205215391337	29.63275891581777	8.216642060238561	0.5430552116881016	0.9801539779525024	0.1117743965180935	0.0670646379108561	1.9721555433198208	0.1172323782280767	0.0565011868387279	1.3981467941298794e-27	0.1551449553644163	0.1600725986873303	2.3302446568831327e-27	0.4189638855170549	0.0133869228333815
21	A-2	0	4D	0.59	0.7073170731707317	19.13043478260869	2150.0	10.687	11.37441	11.3985574272776	20.1289089718988	0.840882988062925	0.673432527411587	0.0986997156021022	0.1806810646404252	1.5179845953521462	0.0564814465692431	1.2306138324534015	0.1460519097404116	0.2944344791261544	0.672241086916799	2.940103636286823e-14	1.7640621817720974e-14	1.092139141171542e-15	6.777273020104876e-11	2.8746826938942287e-14	1.8202319019525665e-15	0.4619408048176435	0.4329735086169575	1.9784154098260875	0.3389878853359894	0.0795360194454549	0.3372921900412735	0.1893359578614869	0.7055655208738167	0.359858103614862	0.6136545732574005	971.8657141609972
21	A-1	0	4D	0.59	0.7073170731707317	19.13043478260869	2150.0	10.687	11.37441	11.6053981211509	20.1773770722368	0.842305460798884	0.682850634095392	0.09734732425	0.1787219248916109	1.5175261520319552	0.0566985882592309	1.2359202604545236	0.1472856599820663	0.2976197621172615	0.6731884205845322	1.6977711345881185e-14	1.2521502583374143e-14	0.1375259437669659	36.97981763231841	2.0851647734180243e-14	0.1864692963403326	0.4571707410024161	0.4217823011052877	1.978033467920872	0.3401381674150341	0.080019489109096	0.3225925092679078	0.1843854274125506	0.7023802378827176	0.3496587128415883	0.6005042259969112	0.0140438158198034
21	B-1	0	4D	0.59	0.7073170731707317	19.13043478260869	2150.0	10.687	11.37441	11.8283298713838	20.2898426648916	0.841900333711747	0.692443059669957	0.153564740271528	0.1481800153215628	1.5158360597645115	0.068878424166425	0.36493514760977	0.1137755807135025	0.3416929483227362	0.3781965539484667	0.0043331172590965	0.1911551799443528	43.51493354883462	7.776322290249261	0.4407907293072358	0.9863991634638688	0.1492730272830594	0.0943290522666489	1.973840592868818	0.1686702844613318	0.0618329658745013	0.0319229534199582	0.1	0.217516322370028	0.0505171607506764	0.4336642475325645	0.0316202949671281
21	A-3	0	4D	0.59	0.7073170731707317	19.13043478260869	2150.0	10.687	11.37441	0.01928440455604	9.04606544663642	0.0160068679255471	0.133180348410101	0.1671755194778686	0.1594870952095463	1.515925050429853	0.0691031251073203	0.3540098676389026	0.1080797815154961	0.3386310119806449	0.3710756876289429	0.0056081915631399	0.2300653674274256	40.423093601071024	9.271014330019016	0.4884863448750352	0.9853740918265526	0.135705972930855	0.0814235837585133	1.973369030577244	0.1293454995083521	0.0584979528207885	2.273177656767573e-15	0.2499998879233395	0.1728826431443199	3.7886294279459406e-15	0.4709760463954852	0.0211240221402486
21	B-3	0	4D	0.59	0.7073170731707317	19.13043478260869	2150.0	10.687	11.37441	0.0	1.51955803346742	0.0016871014427828	0.0	0.1004200625363782	0.1038644931129675	1.5087416689864726	0.0738624096809282	0.4343002233775901	0.12157516052768	0.3911901882774857	0.4198976405122953	0.0033802402457083	0.118316475870867	34.402386596953754	11.986751897459538	0.4456214350549258	0.9828583117228864	0.0639775470244372	0.0433279732785225	1.961218794555242	0.1099028588576879	0.0634060250720796	0.0772371760669835	0.1	0.1631883766675884	0.1140474545646387	0.2655089422623572	0.0259836808195201
21	B-2	0	4D	0.59	0.7073170731707317	19.13043478260869	2150.0	10.687	11.37441	10.665342881014	20.1008503052806	0.837517627273006	0.633528907799636	0.104131118438841	0.1864111698853212	1.5192818630532252	0.0553996919655716	1.190158145615284	0.1404637613208292	0.2848849370045584	0.6648340810170278	3.008967578655544e-13	2.2349645960167602e-13	0.1427679220842179	5.944653775172392	3.415609421556395e-13	0.1922106728621356	0.4785742924070429	0.4679272863535034	1.9792741665213032	0.3377189618766666	0.0781588473533146	0.3777526577953256	0.2025766546275448	0.7151150629951001	0.3863478710935922	0.6543384562390481	32168.044857853714
22	A-3	0	4D	0.11	0.7752808988764045	16.541353383458645	2921.0	0.947	0.0	0.0034672061974981	1.85537953894279	0.0096598251261998	0.193453968393032	0.13215941863662	0.1986126625046783	1.4849683279581234	0.0646144663230938	0.9028263937114864	0.2070595135333125	0.6954947716759978	0.6007522874826563	0.0019065078297234	0.0158991232707571	7.739395738575829	16.901841929007162	0.0556749855200362	0.9280523411037372	0.0886643979710608	0.0710585313472412	1.9802850613824687	0.500865294372377	0.0853577602267527	0.2014325137631226	0.1	0.2488302428039659	0.2513405811517394	0.2855703171226767	0.0214308635235926
22	A-1	0	4D	0.11	0.7752808988764045	16.541353383458645	2921.0	0.947	0.0	0.0837547168995638	2.55118502676991	0.124898858153297	0.26285052554775	0.1345611550535589	0.202896519226324	1.484990455170378	0.0645282647226612	0.9078387157539332	0.2084419069900566	0.6972987538464295	0.6020794573509843	0.0019112515630789	0.0150852422787363	7.292860662693133	16.249196877304133	0.0518437708174818	0.9239819343529024	0.0912766993288754	0.0729932590397335	1.980672477604801	0.503592063950595	0.0853840077817115	0.199692140233232	0.1000000000000002	0.2508574753360886	0.2497112703583549	0.2909750205447941	0.0216766381841843
22	A-2	0	4D	0.11	0.7752808988764045	16.541353383458645	2921.0	0.947	0.0	0.0043801238004034	2.00070534318879	0.0186589912245906	0.117331627070607	0.1313792213818195	0.1967883690761045	1.4852937472691126	0.0646710658337381	0.8978652408373646	0.2053762372506602	0.6922922488804297	0.5994299195670121	0.0019363351566867	0.0173489338060263	8.359675057344948	17.573512107776025	0.0610327350983167	0.9330332856761214	0.0873003968901138	0.0701189045134443	1.979986602762216	0.4939438995414202	0.0852506336056591	0.2031911309831032	0.1	0.2466750160212537	0.2529797991349804	0.2842562073955751	0.0204899637991081
22	B-3	0	4D	0.11	0.7752808988764045	16.541353383458645	2921.0	0.947	0.0	0.0790693944598387	2.65858889289508	0.0986686588010863	0.301424120174457	0.1364271193660489	0.2049685996830589	1.4858441209278348	0.0645571397158446	0.9024036323240516	0.2079570084193997	0.6997771937842119	0.6006399431610355	0.0019074607792548	0.0163893193254688	7.9922182535629345	17.012256896508678	0.0559542871607853	0.9301693715995636	0.0893171849479871	0.0715475964951176	1.9801943997156888	0.5032152486917021	0.0851091964809176	0.2010507332579116	0.1	0.2442685190550028	0.2509837703290385	0.2929055155036453	0.0225259003059412
22	B-2	0	4D	0.11	0.7752808988764045	16.541353383458645	2921.0	0.947	0.0	0.0048396344894242	2.11566000382182	0.0261412678354319	0.0875064449326641	0.1301129747286474	0.1949797916250831	1.4859207270806862	0.0646253987177053	0.8985422632271406	0.2056219226520055	0.6926375145527972	0.5996108920492587	0.001953440817903	0.0178075178557341	8.515975100208022	17.415966723501562	0.0632586321133576	0.93418147884297	0.0853693297088726	0.0687160563179183	1.9800980454252075	0.4937477547039319	0.0849146392377175	0.2049267406954532	0.1	0.2441038533338453	0.2545905488472123	0.2815033657987356	0.0206469940511801
22	B-1	0	4D	0.11	0.7752808988764045	16.541353383458645	2921.0	0.947	0.0	0.0309845908975596	2.3171644023695	0.0538250558267429	0.248430223124698	0.1314006778803831	0.1967908340155307	1.485846793579808	0.0646172836196533	0.8976394124440789	0.2056887254990278	0.6925605669352541	0.5993695177794317	0.001926251858169	0.0171680362863748	8.312664360876191	17.299068042880982	0.0604189976791217	0.932680063367604	0.0874750376549591	0.0701907671606735	1.979802306998871	0.4938194567926357	0.0852164786906045	0.2024091105572019	0.1	0.247020435385624	0.2522517602232193	0.2841496374625791	0.0209989422350488
23	B-2	0	4D	0.07	0.2043010752688172	20.183486238532108	1764.0	1.7239999999999998	0.0	0.0038361019207435	1.64449781125635	0.0312594559927919	0.0746234668896083	0.0476033958681993	0.1065112244093409	1.5038484194706014	0.0674250800504975	1.6374711397531632	0.2051314979566608	0.4696959013160778	0.7318401165763454	0.007326681911508	0.109023389646031	14.280322492885483	11.396952369933338	0.4807741113511756	0.9596782932435188	0.0096874854749774	0.0112317343647414	1.952267434845914	1.9429638990107322e-22	0.05317912549962	0.5594065760152865	0.1	0.0495299873327465	0.4824938788409208	0.2267663484201134	0.0032968158755489
23	B-3	0	4D	0.07	0.2043010752688172	20.183486238532108	1764.0	1.7239999999999998	0.0	0.0036975818276473	1.58901346713374	0.0303164700772999	0.0767558672949517	0.0471383890926057	0.1059471966487016	1.503967210621171	0.0676040031093533	1.6475777956807764	0.2068181758543086	0.471425030731115	0.7330459478853038	0.0072270595426863	0.1077675889398311	14.311678574571769	11.458089383539033	0.4795250892407698	0.9597630811984404	0.0092500071320811	0.0110233800629435	1.952347888878392	2.550820596951421e-20	0.0525344506952007	0.5917158447058826	0.1	0.0490498800281151	0.4965242740830714	0.2247381656514764	0.0034374757519166
23	B-1	0	4D	0.07	0.2043010752688172	20.183486238532108	1764.0	1.7239999999999998	0.0	0.0021106404434264	1.37031828160568	0.0064422648356924	0.239086045955502	0.0476390984377529	0.1062359549506423	1.5036355032832331	0.0678684182318658	1.6300160673580826	0.2064696847347623	0.4701638492955402	0.7309436426120353	0.0072567329845155	0.1087181028836181	14.381687091918783	11.407607486968566	0.4811489835396956	0.9599511058855552	0.0093430057519412	0.011001117387779	1.9523676741094635	1.2303555122580994e-11	0.052577226814393	0.5774708996077864	0.1	0.0486871671647642	0.4904332665887037	0.2259551752220395	0.0034212987546353
23	A-2	0	4D	0.07	0.2043010752688172	20.183486238532108	1764.0	1.7239999999999998	0.0	0.0036839584685928	1.59426440057132	0.0276462268864594	0.0835831066420584	0.048195882452183	0.1074592785318492	1.50316717535856	0.0675958574150387	1.6296360822620832	0.2057812576377655	0.4708195982994247	0.730897788758752	0.0073687012400633	0.1095556823199826	14.267705820984096	11.28232851453183	0.4800047333839656	0.9596440764147242	0.0096288694554	0.0112237932696754	1.952511301491504	1.2594122699997658e-22	0.0531362272343626	0.5656397795881363	0.1	0.0491756683166096	0.485261218339681	0.2282387541215073	0.0034887749764215
23	A-1	0	4D	0.07	0.2043010752688172	20.183486238532108	1764.0	1.7239999999999998	0.0	0.0032025374965822	1.55550445883198	0.0133904635079635	0.153754329141467	0.0480809266418645	0.1063611045638844	1.502983780253654	0.0678840370880731	1.6121267619512718	0.2044942845839827	0.4684122077773112	0.7287678037624064	0.007295452007991	0.1094999323083263	14.409341736246926	11.480609938218567	0.482235543287367	0.960024895791997	0.0096914874682689	0.0112062828899799	1.9518410104748305	4.829595290866109e-07	0.0534018474771296	0.5563016437539292	0.100000000021055	0.0493522489353218	0.4811042574910625	0.2270673197621907	0.0033729853903452
23	A-3	0	4D	0.07	0.2043010752688172	20.183486238532108	1764.0	1.7239999999999998	0.0	0.0006851503315643	0.947682637359609	0.0039056100968138	0.185111782798427	0.0478888206449153	0.1078692690840058	1.50301494475506	0.0677055121726622	1.6524937476291566	0.2063384900176654	0.4713213882936876	0.7336285613971071	0.0074061624974651	0.1098624107034896	14.233918475471173	11.191283227378843	0.4800301733178027	0.9595521573755352	0.0094973171578782	0.0111339557706999	1.952029538301848	4.106854200252574e-21	0.0528269394465818	0.572326414461588	0.1	0.0486484383885096	0.4881971500441191	0.2288656355581956	0.0037127224415447
24	A-1	0	4D	0.35	0.1538461538461538	18.181818181818183	3050.0	2.645	2.45309	1.17904605110373	7.14657407607617	0.570005745496491	0.289436724801227	0.0338939641376365	0.0262096330711168	1.5336231156126747	0.0703700139868166	0.1732832006514434	0.1000000000000009	0.1693652799098952	0.2240876311621189	0.0037010646718489	0.0900895153062004	23.741513400573268	6.738087252964723	0.5821537423046129	0.9753507520207896	0.0433970519296002	0.0384529536182083	1.960225046540332	0.0937639953211131	0.0593727565180001	0.2860729452449384	0.2499999999999993	0.2484809777854919	0.3228548470869505	0.1547521019955256	0.0094088826848051
24	A-2	0	4D	0.35	0.1538461538461538	18.181818181818183	3050.0	2.645	2.45309	2.97791953053669	7.17686262796324	0.86678345583638	0.478704721672749	0.0333507416272507	0.0258257947729873	1.5338220595050842	0.0697983443747251	0.1743694296706487	0.1000000000000004	0.167083794615625	0.225176024503977	0.0037355075764717	0.0905672666735552	23.64496934338939	6.338446863305218	0.585938311552395	0.9752525981162522	0.0436102030056886	0.0381748595921155	1.9603151073430656	0.0941654809591074	0.0592899110223579	0.275365326484169	0.2499999999984433	0.2469778938319798	0.3145718914754719	0.1545679210386581	0.0098874726163395
24	A-3	0	4D	0.35	0.1538461538461538	18.181818181818183	3050.0	2.645	2.45309	3.11087881808356	6.87472708423165	0.871874039835277	0.519007800401903	0.0333375717381507	0.0255377147551454	1.534021888375307	0.0704601090409405	0.1660340397834272	0.1000000000691923	0.1676434543785341	0.2167449893354194	0.0036553191403223	0.0887123467557012	23.66938479245305	6.501281991447248	0.5823561112943993	0.9752774944593332	0.0430041663251875	0.0380834420537005	1.960370355363488	0.0944367479359151	0.0593710096159658	0.2855756385491217	0.2499999991542131	0.2500004343270665	0.3224745872831293	0.1523335035645473	0.0093644628014022
24	B-1	0	4D	0.35	0.1538461538461538	18.181818181818183	3050.0	2.645	2.45309	1.15536807082449	6.79350779463052	0.568840037310468	0.298975862308763	0.0326519994665999	0.025226981542022	1.5347705929205169	0.0708080846939564	0.1726014318916965	0.1	0.1672354878043707	0.2234029407233766	0.0036474323287876	0.0876336772344873	23.426128337689065	7.0199328457609305	0.5809438888274384	0.9750271874200056	0.0421102759237898	0.0379864005003595	1.960807401187816	0.0921452355196287	0.0591954934850586	0.3020696176179522	0.25	0.2518206233681907	0.3348628661450893	0.1508470592768688	0.0092855494682074
24	B-2	0	4D	0.35	0.1538461538461538	18.181818181818183	3050.0	2.645	2.45309	2.28852486840252	7.02857576383296	0.817013217043316	0.398528351876519	0.0330336018440519	0.0252417930665993	1.5347729657778908	0.0705600917599149	0.1641247595634003	0.1000000000023371	0.1661704909762771	0.2147879093162439	0.0036743552928443	0.0889298869960988	23.60285462575839	6.411653803233576	0.5854387184625426	0.9752095358470056	0.04266941257918	0.0377313017381011	1.960760302349013	0.0940047279847301	0.0591716127826454	0.284270475204799	0.2499999999433244	0.2483907905611804	0.3214745750037185	0.1519029818007993	0.009448330431632
24	B-3	0	4D	0.35	0.1538461538461538	18.181818181818183	3050.0	2.645	2.45309	3.12956774195129	7.05385249829351	0.871608132822487	0.509022182523185	0.0336090042889039	0.0257852511628679	1.5339924852471398	0.0704433269617513	0.1672125880676875	0.1	0.1689893937096604	0.217948181075641	0.0036939825551123	0.0895536193004302	23.64310834291608	6.426050108405852	0.5869096148994896	0.9752506984041376	0.0425011717805626	0.0372461563057156	1.9604712693949624	0.092156342247114	0.0591116797974317	0.2763559860895344	0.2499999999999397	0.2441009913908499	0.3153467203695234	0.1525850267690139	0.0097598078148721
25	B-1	0	4D	0.64	0.9444444444444444	21.782178217821784	3179.0	10.906	11.26899	11.4561698620653	20.1871816229798	0.843869680378072	0.672493933096974	0.2076244703891741	0.2070320323940162	1.5211807022026214	0.0693383646079877	0.3971465887713171	0.1098832680795122	0.3418299335041408	0.398283054110109	0.0058623318462753	0.2778033001182744	46.78784964805013	8.143233939424045	0.4586801496781578	0.9873385265536164	0.1766612639670953	0.120822663180788	1.9776682298313049	0.1440262562002	0.0597110957935769	0.0839227823213823	0.2015739324339458	0.1994899168177013	0.1227079788693837	0.6056579956930787	0.0709867630215964
25	B-3	0	4D	0.64	0.9444444444444444	21.782178217821784	3179.0	10.906	11.26899	10.6983579215019	19.2733291650513	0.843612861002155	0.657986817453176	0.1066838624310606	0.2049673991285463	1.5233436551701829	0.0508174720641461	1.3212596400040986	0.126035262642991	0.2723032069155588	0.6877048851144762	1.2932546259524691e-14	6.530551024872938e-13	49.89702428138037	49.9862490046006	8.675965029362187e-13	0.9881181117394824	0.5909906166486151	0.5477501375104138	1.9812026088439227	0.3466134557441638	0.0767381828950855	0.3268338990161821	0.189375163572374	0.7276967930835736	0.3526348133825386	0.7527175366396132	1086537.758993362
25	B-2	0	4D	0.64	0.9444444444444444	21.782178217821784	3179.0	10.906	11.26899	11.2276305972071	20.0166907692182	0.842166026132706	0.666036634853165	0.209084894204488	0.2131003081075979	1.5207051805429888	0.0698009685388466	0.4192047059085137	0.1120991909490512	0.3400853198626929	0.4113057008845312	0.0062040348003615	0.2836810762538015	45.12525548007361	9.51771808648988	0.4527246835704004	0.9868781487670096	0.1843514146978001	0.1298269861311452	1.978432273084996	0.1495870825845145	0.0596962043044971	0.1042364515833279	0.2029935735093973	0.2071899965669066	0.1480134283719255	0.6266083704925447	0.0734285348887588
25	A-2	0	4D	0.64	0.9444444444444444	21.782178217821784	3179.0	10.906	11.26899	11.3034428039016	20.1304908548678	0.843031347992298	0.666058925297797	0.2113340914143893	0.215262231443898	1.5207961163123094	0.0698862368185567	0.4185873467135328	0.1118382036237441	0.3408382657854848	0.4109488970819271	0.0063380690636818	0.2881358240445309	44.86113668839521	9.442812849987677	0.4562236204617462	0.9868019138167928	0.1835929897577159	0.1281690338106897	1.9783599459087664	0.1472510766819905	0.0594748964659716	0.0981150749809778	0.2025519123415375	0.2029381137527689	0.1405428395650263	0.6315670892991186	0.0492301546651653
25	A-1	0	4D	0.64	0.9444444444444444	21.782178217821784	3179.0	10.906	11.26899	11.7397291589034	20.5526392403637	0.845068017312029	0.675925471899739	0.106297856968263	0.2006488912529832	1.5212801713206106	0.0528468057596134	1.2876099384853097	0.1316473673478727	0.2912850786452187	0.6821377193630042	5.872257606891874e-14	6.687670685191561e-13	10.788585332739306	49.99213708874546	9.708594297853536e-13	0.9473156689378134	0.5504580184181244	0.4881913754232789	1.9802141857372644	0.3473718668785446	0.0785697862113626	0.2868821219576674	0.1741473999467369	0.7087149213538104	0.3234726632265577	0.6888402666769309	0.0439624276141815
25	A-3	0	4D	0.64	0.9444444444444444	21.782178217821784	3179.0	10.906	11.26899	11.1886210830852	19.7716412015143	0.843726001883846	0.670706340780924	0.2113972531620523	0.2153403828017086	1.5215362298645958	0.0694602844508571	0.4186527004522314	0.1106069017527778	0.3299776232796342	0.4109866888551617	0.0061070073225528	0.2859304825771038	46.22006545516615	8.573751574760001	0.4381466208819377	0.9871849816063466	0.2036432096560319	0.1513200002121608	1.9794413386684864	0.1618456606445158	0.0605031659398702	0.1430643057912475	0.2013829966093076	0.2318757558384278	0.1925328732335034	0.6525908655909733	0.0472435046526404
26	A-1	0	4D	0.73	0.8518518518518519	15.27777777777778	2664.0	4.614	4.22831	4.63550634086164	13.0920229281699	0.888519928103854	0.398495342147238	0.1053163817760623	0.1112257788164123	1.5318439585482109	0.0725317867674153	0.4561109007040843	0.1270447635516604	0.2756695920679753	0.4318778457830573	0.0040200500189945	0.2034145309611245	49.99999999999999	11.667628134216535	0.5041565127029467	0.9881422924901186	0.1380682156802994	0.0888346545158989	1.9740006432996708	0.1513250327747737	0.0627594616203078	0.0434113316970642	0.1000000003251097	0.220173895229078	0.0674705737347869	0.4034749642934359	0.028050641782185
26	B-2	0	4D	0.73	0.8518518518518519	15.27777777777778	2664.0	4.614	4.22831	4.00703636456424	13.1849992954403	0.853498276848584	0.356074213907729	0.1081084386175593	0.1106246397088137	1.5309554599551771	0.0721272220061751	0.4232747889381291	0.1210960986332683	0.271852322007749	0.4136472368066149	0.0040872196838638	0.2068133160035125	49.99999999999999	10.354554798624063	0.5082292726617382	0.9881422924901184	0.1395396916801989	0.0894912141097376	1.9753068594876315	0.1544866116728283	0.0621833465385416	0.0413316027301838	0.1000000000001756	0.2199184053305127	0.0644465399088911	0.4069291698220639	0.025548385047556
26	B-1	0	4D	0.73	0.8518518518518519	15.27777777777778	2664.0	4.614	4.22831	3.64143403764239	13.2536881277383	0.807549753576794	0.340225147817108	0.0448188241199074	0.1132757536941765	1.5260160527433988	0.0501648195824371	1.9274146727080743	0.1370593980304252	0.2426745542782784	0.7626032615545784	1.894497826367944e-17	1.3129156525447533e-17	0.0930151274239374	49.999310394747496	2.8127044879035985e-17	0.1342180332624073	0.4357275523638145	0.3535047624215823	1.9723230988106253	0.3691651707001993	0.0823620205887462	0.2112977031262428	0.1406308476666005	0.7573254457217216	0.2604441037020459	0.4667805161157589	63671.25292522969
26	B-3	0	4D	0.73	0.8518518518518519	15.27777777777778	2664.0	4.614	4.22831	4.15916745671464	13.4467848038248	0.840327507085222	0.368077585807282	0.0937736017081847	0.1156595834095588	1.5329644362509165	0.0712936803307678	0.63339171475445	0.1465047882069495	0.2894872579524136	0.5135365408876197	0.0035317751848887	0.1787078243553724	49.99999999999999	14.854843537499312	0.4472922737762752	0.9881422924901186	0.1469989886585635	0.1051651458529247	1.9718989936106217	0.1592887569546926	0.0657502822251912	0.1154140774205815	0.1488224822249597	0.2632204682713111	0.1613248621507503	0.399532553617856	0.0396530696830649
26	A-2	0	4D	0.73	0.8518518518518519	15.27777777777778	2664.0	4.614	4.22831	4.54773650202483	12.6925598418379	0.88723000981988	0.403840481298296	0.0986788891955504	0.1141686741153849	1.5325293662324568	0.0717616980985246	0.5569716182063882	0.1397051383987063	0.2872335527986058	0.4814047375421718	0.003676031813245	0.1860072097502014	49.99999999999999	13.365613393174572	0.4679699761487041	0.9881422924901184	0.143925993084487	0.0973009185587962	1.9723918051061828	0.1592241000641554	0.0650542303606028	0.0760482694858243	0.1223841968151381	0.2447964710526901	0.1124894078105748	0.3974768024243825	0.0381419827874732
26	A-3	0	4D	0.73	0.8518518518518519	15.27777777777778	2664.0	4.614	4.22831	4.37898845537802	12.3983180120915	0.886958484585509	0.398205941845962	0.1071380282641088	0.1091122038167964	1.5318762467206413	0.0726674340288439	0.4184264689641382	0.1203974643705771	0.2669320379326143	0.4108558464605973	0.0041647965102828	0.2107387034203096	49.99999999999999	10.699021787173836	0.5155510530216291	0.9881422924901184	0.1390434580455468	0.0889130787642344	1.975778460457266	0.1521498893904557	0.0619497627052862	0.0394625105994487	0.1000000000000926	0.2175169090457564	0.0617120002272776	0.4087639860013405	0.0264175793699729
27	A-1	0	4D	0.83	0.5294117647058824	17.1875	3307.0	1.567	0.0	0.846907965779868	3.27480092455623	0.927911441213996	0.278705015205923	0.0067694412919609	0.0717560776947857	1.5402169342551169	0.0312606750143251	9.999999999999998	0.1209852286039997	0.1405015459181988	0.9433962264150942	1.626041140701775e-16	9.75624685547652e-17	6.928405980985603e-10	1.0057181173972476e-07	1.9103159057614247e-16	1.1547343288308564e-09	0.4879785916520124	0.4389577171310923	1.9772219808568352	0.3665590203419835	0.0818520865693466	0.2995429812710351	0.1770854333888798	0.8594984540818009	0.3329946289478989	0.5107137948258781	10427.392832580244
27	A-2	0	4D	0.83	0.5294117647058824	17.1875	3307.0	1.567	0.0	0.818772527900992	3.12992331727419	0.924932197327949	0.282826218728289	0.0069454223061629	0.0736214764453261	1.5409881192340094	0.0312858468780869	9.99999999999988	0.1214357276506028	0.1389180454978225	0.9433962264150938	3.3859766619550376e-15	1.1420553481804412e-13	33.1289787319747	49.99999997552533	2.1549703222453394e-13	0.9822111423898168	0.4946587004466367	0.4563419000295054	1.9797066453120635	0.3640482910622772	0.08061943575471	0.3225389134315551	0.1859661830582098	0.861081954501962	0.3496209306031456	0.5299633764749457	191764.3211082469
27	A-3	0	4D	0.83	0.5294117647058824	17.1875	3307.0	1.567	0.0	0.812163403153267	3.12174509742356	0.924722259608652	0.281342061634031	0.0723580710480785	0.0769258460795386	1.536591489142924	0.0839521021126523	0.4631273742555281	0.1057269102570506	0.1760331100530504	0.4356273626947481	0.0056463446638581	0.2502340327103566	43.7178813210054	11.09427461529846	0.572622561389513	0.9864614466640664	0.1451669648353827	0.1098365820256625	1.9822612818435108	0.1625024849433817	0.0591155832875364	0.15662243231589	0.1850512410941596	0.2513443285574366	0.2070020998934645	0.4369964608155577	0.0241531160668024
27	B-1	0	4D	0.83	0.5294117647058824	17.1875	3307.0	1.567	0.0	0.730003318316846	2.9309440430664	0.927085110275694	0.268656715662219	0.0715812376206218	0.0764490363845612	1.5381231169168534	0.0844987358773559	0.4680038362809346	0.1080794846194404	0.1775758595213112	0.4382042651744069	0.0056478420107063	0.2510135231755892	43.84414746371322	11.04615477711982	0.5830543357689653	0.9864999097915	0.1379442653079769	0.103052244595346	1.981350038925676	0.1510972478891378	0.058901916061966	0.1470571129961054	0.1875208892907371	0.2393698047097235	0.1968485547327518	0.4305148041554966	0.02200220131362
27	B-2	0	4D	0.83	0.5294117647058824	17.1875	3307.0	1.567	0.0	0.700039192172095	2.70726835201934	0.923540269900328	0.279985287879805	0.0663578422114745	0.0794700945702557	1.5366603259015372	0.081333340208383	0.5975991370694963	0.1101202297048952	0.1639759479988087	0.4989976349948036	0.004892054136212	0.2217601757590807	44.73068718875442	8.659118492404271	0.4575725654425972	0.9867639332820692	0.2158626602679028	0.1834145543545436	1.9873132699099985	0.2275796581542516	0.0639180209892008	0.249681710245355	0.1775230496043864	0.3784514865585942	0.293853224371814	0.48464482468388	0.0360185893229551
27	B-3	0	4D	0.83	0.5294117647058824	17.1875	3307.0	1.567	0.0	0.760600981725757	2.94413651120197	0.922912861670973	0.279922778425052	0.0709545359223413	0.0780791708790913	1.5352943564703572	0.0832147969982639	0.5004112684853266	0.1054780883717576	0.1706140365913899	0.4547493131128357	0.0054706063421776	0.2429115042689561	43.8030312318658	10.139530936472456	0.5307960088611993	0.9864874090044238	0.1705769680896496	0.1366455922950945	1.9848826629337544	0.189941970259226	0.0607877759240783	0.2010787964250721	0.1792004802549212	0.2985899545474108	0.2510100096549988	0.457636267443142	0.0284559054323377
28	B-1	0	4D	0.3	0.4857142857142857	15.942028985507244	3436.0	2.579	1.94397	2.85471970418296	6.82816093853333	0.747691994101926	0.559161155151739	0.0902376462102251	0.1150264421344844	1.499815312055001	0.0696763937740318	0.6747057017257443	0.1601017711172538	0.4826541514777648	0.5293031174272639	0.0035307608368164	0.0904215704608255	25.00965600330921	21.494792614794573	0.3794114253749736	0.9765713370018532	0.0453072604452607	0.0328726188180998	1.959911612435418	0.1219825975205606	0.0641146378903161	0.1255485874679144	0.1	0.1379344231472616	0.1730395312408578	0.2383206314134098	0.0046129470074961
28	B-3	0	4D	0.3	0.4857142857142857	15.942028985507244	3436.0	2.579	1.94397	2.14497671021897	6.70888384286733	0.725052845090173	0.440963504505116	0.0903228689023746	0.1145980095232891	1.5001056703679192	0.0697271251470961	0.6687596277212169	0.1593195870298456	0.4817513133776639	0.5270971846119954	0.0035187952840609	0.09086269780555	25.22210400733732	21.576688508565177	0.3819719398875397	0.9767640932811086	0.0448848500728497	0.0324172316430702	1.9598082657571407	0.1176367099818977	0.063834248062591	0.1222310331984163	0.1	0.1362767467347965	0.1692409043365437	0.2378779389719094	0.0046214505238708
28	B-2	0	4D	0.3	0.4857142857142857	15.942028985507244	3436.0	2.579	1.94397	0.199767982390162	6.29808048621358	0.125319463405203	0.253104082532226	0.09091136247041	0.1153016090252168	1.5001688971264802	0.0698030848325925	0.6682860083935648	0.1593189868988525	0.4809380372381153	0.5269205872893201	0.0035322927678751	0.0915171123089453	25.30869962457739	21.58724548179077	0.3817298018619871	0.9768417555225029	0.0456575446472779	0.0329244474269527	1.9598402999379896	0.1181748577169439	0.0639218698988983	0.1211173461320952	0.1	0.1373321608998976	0.1679578875501197	0.2397431687611149	0.0045297441220743
28	A-1	0	4D	0.3	0.4857142857142857	15.942028985507244	3436.0	2.579	1.94397	0.810210527772116	6.69396737461303	0.422736541827767	0.286315263118363	0.0906982596188746	0.1152499514260751	1.4998465186843326	0.0697047612053079	0.6706963938488987	0.1591949719664624	0.4822718687890682	0.527817972173023	0.003529026201302	0.0910540647203145	25.201470299857583	21.79308716865479	0.3810224074729775	0.9767455112818392	0.0452075907882183	0.032668975820683	1.9597888061475688	0.1182225785370175	0.0639886264219096	0.1226435926153569	0.1	0.1367057237379542	0.1697151872218103	0.2389729919670727	0.0045144241086117
28	A-2	0	4D	0.3	0.4857142857142857	15.942028985507244	3436.0	2.579	1.94397	1.31002889031893	6.87500852611175	0.600251907141873	0.317449087948553	0.0907043011896742	0.1155153109060959	1.5002571241398317	0.0697057910781119	0.673537300778479	0.1593576060042272	0.4811089001634629	0.5288712787342497	0.0035267548586419	0.0912686958501418	25.2789452367227	21.81685019972841	0.3801243448629121	0.9768151292677651	0.0460974193424907	0.0333182047531484	1.95997092093674	0.1210348390682621	0.0641855901897608	0.1227780910164119	0.1	0.1387667549736249	0.1698696910468805	0.2401022115093863	0.00469453680004
28	A-3	0	4D	0.3	0.4857142857142857	15.942028985507244	3436.0	2.579	1.94397	1.85457913370307	6.45171392518446	0.728991945481335	0.394318848672092	0.0908659642204117	0.1153115569407276	1.5001970145632395	0.0699678612577514	0.669029145621772	0.1591163176757949	0.4809121815228712	0.5271976202674015	0.0035495520310836	0.0916648577886728	25.22434543456683	21.56696887169684	0.3822925290202592	0.9767661100444824	0.0455068475116241	0.0328003290735503	1.9597987252477664	0.1170012980231815	0.0639807587988354	0.120777879970083	0.1	0.1367952894568695	0.1675660190558236	0.2397767438029507	0.004370626651692
29	B-2	1	2D	0.8	0.15	20.0	1200.0	0.0	0.57639	0.286127767395454	2.09574075996345	0.489677033058319	0.278812801990291	0.0796082271286967	0.0550706637317359	1.5800192251915235	0.0851950932667669	0.0917710105854676	0.1000000000000001	0.0854694315012978	0.1326609661017725	0.0078491300244262	0.1166529741243203	14.261898549431624	9.99074508641152e-17	0.181044910406548	0.959628307379144	0.4089046898042344	0.4726080578672238	1.9861944554268656	0.2237543978238144	0.0653568125587828	0.5557902603012151	0.1761047519037699	0.7334856580921543	0.4808746702506114	0.6443316957232801	0.539234526452579
29	A-3	1	2D	0.8	0.15	20.0	1200.0	0.0	0.57639	0.513679769369138	1.94859186533786	0.955245779480493	0.27596655312025	0.0571418414978238	0.0526930443354802	1.565365043874014	0.0851950932667672	0.3221446658747783	0.1	0.0851649985962133	0.349342871890042	0.0073992139161676	0.0878337095446854	11.270681202061777	4.4042241413807383e-14	0.1419610091694121	0.949455301697784	0.4069301195395337	0.4781903858371725	1.9867929140972669	0.230519285889207	0.0661343123961662	0.5751167163007596	0.1793603472977195	0.7728739922343744	0.489412420334904	0.6187171397173383	0.3871182290171544
29	B-1	1	2D	0.8	0.15	20.0	1200.0	0.0	0.57639	0.523006021040096	1.96170601125325	0.959336131183416	0.277908585840131	0.0557265496083874	0.0526662931250837	1.5636612103176697	0.0851950932667672	0.3450844076152341	0.1	0.0852188597754492	0.3651360712700765	0.0073739958330449	0.0872441713033125	11.231329075661614	5.062980820357659e-16	0.1411690164497492	0.9492871852212894	0.4068528991743468	0.4781017134376166	1.9872218947180824	0.2311137250382954	0.0661495995262331	0.5751218054679217	0.1791937482655339	0.7736121237748016	0.4894146315657159	0.6180121778660128	0.372262924236775
29	B-3	1	2D	0.8	0.15	20.0	1200.0	0.0	0.57639	0.516941867967051	1.96711193248458	0.95619891447771	0.274830158712429	0.0490251035175432	0.0526704117353326	1.5548985981251324	0.0851950932667672	0.4743559514664762	0.1	0.0868849826658394	0.4415258749383657	0.0071770201859204	0.0774180405317789	10.186933647428477	5.227649292566863e-32	0.1277086107362738	0.9443771492797643	0.4039417404552674	0.4761200099927432	1.9873393045068528	0.2347225651279287	0.0665256600412268	0.5786848505829737	0.1809452071809882	0.7854064065978866	0.4909580795042526	0.6062084622598549	0.3071945032645377
29	A-1	1	2D	0.8	0.15	20.0	1200.0	0.0	0.57639	0.523941086710996	1.97244019938973	0.957588818193838	0.277395585430545	0.0608309790263256	0.0529471326194338	1.5686512398748231	0.0851950932667672	0.2703975090803664	0.1	0.0848925004273947	0.3106597919450155	0.0074662459328657	0.0925048788860025	11.789744420124686	5.781341452633967e-24	0.1483172002308526	0.9515728509277868	0.4078439714369772	0.4782442202331661	1.9866335124336645	0.2298985991745917	0.0659885014020519	0.5726156415850508	0.1788755673595421	0.7667902993417527	0.4883233868610464	0.6236962317386024	0.4192434784148592
29	A-2	1	2D	0.8	0.15	20.0	1200.0	0.0	0.57639	0.52991574434454	1.99773216729803	0.953851317338257	0.278092244016282	0.0828605461046867	0.0553870130537096	1.5814841349759858	0.0851950932667672	0.0684364955033391	0.1000000000000006	0.0856969256058479	0.1023829428281078	0.0079321888517124	0.1207303866548492	14.620311683424587	4.270906378580071e-17	0.1867987167586194	0.9605789938813528	0.4065729727177527	0.4701953199385282	1.9858682596142136	0.2218016099574121	0.0652067995436909	0.5564844480327593	0.175956215839919	0.7275043576355327	0.4811862787946423	0.6463127196470871	0.5539346618622256
30	A-3	1	2D	0.02	0.2653061224489796	20.0	1200.0	0.0	0.0	0.0	0.0319988196803758	8.42496107604341e-05	0.0	0.0500949695042675	0.0921806249450094	1.4955183678058188	0.0656255325639814	1.2401173981582438	0.1908409859827678	0.4993054556541813	0.6739338475900862	0.004583680017169	0.0302606825210139	6.001831368609239	11.714237079254534	0.163909974396191	0.9091161275562242	0.051078236038719	0.0621763927836884	1.9581775167448392	0.1762168307676193	0.0899999999999999	0.6172776040377875	0.1493224862102153	0.3367845699496276	0.5070968216208351	0.1846177002497118	0.0215863769519109
30	B-1	1	2D	0.02	0.2653061224489796	20.0	1200.0	0.0	0.0	0.0	0.400730873079509	0.0010769054481111	0.0	0.0492178527278688	0.0541891955266339	1.4989780098518612	0.0651482467297934	0.5010069014236009	0.1826923751509091	0.5815569928223336	0.4550442878930182	0.0011839335013098	0.015607948151237	12.58312906423282	18.905417537891	0.1675040808919004	0.9544872846896524	0.022066740944886	0.0233823661473832	1.9650013729592488	0.2268388546253239	0.0760840618496254	0.4596202767677892	0.1409030930568539	0.2509389262857658	0.4337594200913096	0.0931795098252542	0.0767997589229095
30	B-3	1	2D	0.02	0.2653061224489796	20.0	1200.0	0.0	0.0	0.0	0.142372687552879	0.0004073283203739	0.0	0.0504940182273269	0.0884699200576841	1.4956578067300494	0.0656439526856364	1.1520871414785705	0.1879571387978301	0.4999939560161827	0.6575512793880416	0.0042560077186504	0.0289908496725366	6.2117474377442194	12.151074614285768	0.1638438195331349	0.9119168751508062	0.0494702180049282	0.0594812092540626	1.9577235062097311	0.1700464455251998	0.0899999999999999	0.6023640010670067	0.1490398194853948	0.3361622244506825	0.5009830638080102	0.1769419789842834	0.0237772934405768
30	A-2	1	2D	0.02	0.2653061224489796	20.0	1200.0	0.0	0.0	0.0	0.0532809703687098	0.0001519066460876	0.0	0.0512175773788375	0.091279977840993	1.4953885695111884	0.0655293887470645	1.1822002232910909	0.1887100656408532	0.4971851474424136	0.6633374902781612	0.0044441785422582	0.0300002058614505	6.150450184705247	11.83732411489801	0.1634055696256923	0.91111703907401	0.0523094577040142	0.0623133494321429	1.9577236817122567	0.1705957449942811	0.0899999999999999	0.5912444167311827	0.148887656338457	0.3394092829318941	0.4963250265244294	0.1835935331345866	0.023198514597001
30	B-2	1	2D	0.02	0.2653061224489796	20.0	1200.0	0.0	0.0	0.0	0.172593420792558	0.0005241056295024	0.0	0.0487932984454863	0.053788802279693	1.499099676677936	0.0654692890958377	0.5023809415095779	0.1792392804973344	0.5745056430295339	0.4557235367491274	0.0012723511300112	0.0171714587231789	12.895848998087835	19.060145016777245	0.1834043428633727	0.9555418855023488	0.0211095601415226	0.022665977367998	1.964454586898544	0.2276363531721341	0.0755838369240276	0.4737304432702919	0.1416097635162757	0.2420900141070933	0.4412005324422369	0.0936262383708699	0.0764792607808994
30	A-1	1	2D	0.02	0.2653061224489796	20.0	1200.0	0.0	0.0	0.0	0.272326208592593	0.0007098362352518	0.0	0.0505235954933776	0.0919441205791923	1.495392133024514	0.0657093020010988	1.2198253643932349	0.1904359582173996	0.4993547876822146	0.6702980342292065	0.0045464445862881	0.0303395100053626	6.073238709840405	11.76709441354799	0.1647759474088538	0.9100886352056856	0.0510840835636046	0.0618422110959794	1.9580329411564927	0.1763598756805479	0.0899999999999999	0.6105964672730171	0.1491277025773292	0.3358692649089316	0.5043765480733999	0.1841258416805344	0.0221125974261318
31	A-3	1	2D	0.0	0.0	20.0	1200.0	0.0	0.0	0.0	0.0216999292965334	6.3256041346374e-05	0.0	3.194960544817764e-26	4.068227306072242e-26	1.5022368105024524	0.0657154482028181	0.6733263052875317	0.1915104539244529	8.102368250309165e-25	0.5287932107359448	0.0024904512896466	0.0205683258580193	7.658874985239134	24.75021449252284	0.4096431636090821	0.9273508799839733	0.0269849913441316	0.0296420222820693	1.9919564119418207	0.2995886328688061	0.0751806223236255	0.4984632866489894	0.1360161696634838	0.5903568363909178	0.4537823819033761	0.0502103481400886	616285.1463278361
31	A-1	1	2D	0.0	0.0	20.0	1200.0	0.0	0.0	0.0	0.082991104857693	0.0002316323640062	0.0	0.010827006059593	0.0104809215579659	1.4501722630321818	0.0851950932667672	0.3680350690004057	0.1	0.1335242829925475	0.3801877440043977	0.0047015893207922	0.0316005398854024	6.121246312529354	9.607565660190204	0.4025828651650209	0.9107308418556964	0.0143470648946918	0.0364130365091194	1.938382601838112	0.2202685535312498	0.0777251965831555	1.9380129508295143	0.1573864805930893	0.4638928518424314	0.7635945869370374	0.0784944979524878	0.0320158552352776
31	A-2	1	2D	0.0	0.0	20.0	1200.0	0.0	0.0	0.0	0.0230800716551132	7.63449477041502e-05	0.0	0.0103721326526553	0.0098397587852593	1.4521905737448546	0.0851950932667672	0.3486726707781034	0.1	0.1279864522614905	0.3675373830386843	0.0046525169109144	0.0313176660799778	6.131338473270072	9.598695125674144	0.407351141644956	0.9108646813137417	0.0137405754827334	0.0357238278876372	1.939490298286621	0.2244358382265715	0.076468307054742	1.9998785809610595	0.1574839936927044	0.4646624060935535	0.7692199918896956	0.0768812527528744	0.028786775190708
31	B-1	1	2D	0.0	0.0	20.0	1200.0	0.0	0.0	0.0	0.108447489792605	0.0002647975497212	0.0	0.0106670961275496	0.0101988927849901	1.4528503502972991	0.0851950932667672	0.3561077038248191	0.1	0.1310951826243606	0.3724556369541252	0.004670239736654	0.0312295998540373	6.086937205585909	9.721136556051436	0.4014210348574321	0.9102728227358272	0.0139926069032467	0.0363691241827437	1.939035201598627	0.2215938096006355	0.0768051419338141	1.999167148353532	0.1576265380878433	0.4674837825182072	0.7691568238002408	0.0777976168217712	0.0305993880734481
31	B-2	1	2D	0.0	0.0	20.0	1200.0	0.0	0.0	0.0	0.01379137281433	5.03544614981194e-05	0.0	0.0105795421610007	0.0101666072755303	1.4513616756556709	0.0851950932667672	0.3609685486208896	0.1	0.1308618657225867	0.3756299299690138	0.0046553717565579	0.0307795397575254	6.011618011851921	9.684574664645671	0.3961860520025033	0.9092506555998175	0.0141323619943082	0.0367434626893251	1.9398794127618475	0.2270477716288795	0.0768137103361764	1.9999519899167264	0.158534393123627	0.4729520822749101	0.7692265079020872	0.0776896097223809	0.0297912682024194
31	B-3	1	2D	0.0	0.0	20.0	1200.0	0.0	0.0	0.0	0.0313672953557038	8.5826278272314e-05	0.0	0.0098857522089828	0.0093305202450098	1.4498029802097117	0.0851950932667672	0.3438351323970595	0.1	0.1226942077196215	0.3642957552595239	0.0046320382300689	0.0309833367118327	6.088920767256181	9.347194388953504	0.4074237931589817	0.9102994308234088	0.014202794262296	0.0357330927600648	1.940210238327606	0.2323153106236984	0.0767618056018019	1.9159199028127127	0.156966745148784	0.4698819991213967	0.7615186400293505	0.0760469497169074	0.0279545295498945
32	B-1	1	2D	0.92	0.625	20.0	1200.0	0.0	0.0	0.331416702782741	1.19932660428214	0.961679204270595	0.287347021540511	0.0815527134697125	0.0489316280818275	1.588323977440409	0.0712571682733644	7.47767811215557e-22	0.1002608220008515	0.0580235637037707	1.2462796853592613e-21	0.0097905610876351	0.2681359019009438	26.787184401472302	5.952615158034431e-19	0.3179579587909834	0.9780919428881584	0.4274795660220969	0.5262386194230021	1.9916102645102047	0.182340525874577	0.0630870539422907	0.6310263723712125	0.1708830680689651	0.6240184775052459	0.5126018309061281	0.8433061494057734	0.3327201095718373
32	B-2	1	2D	0.92	0.625	20.0	1200.0	0.0	0.0	0.294433757643607	1.07782041810983	0.966042814324498	0.282777480426174	0.073970803353576	0.0443824820121972	1.5894458003763483	0.0690993622994536	6.98475598385756e-13	0.100000000000003	0.0500893144686055	1.1641259973082379e-12	0.0109903656202546	0.3175945844220924	28.29754494034133	1.2878718505466536e-11	0.3584318472381153	0.9792369905042558	0.4229749783085738	0.5240898019796276	1.993031267087556	0.1716489217082768	0.0621400355924139	0.6390562772185719	0.1691306619160405	0.5914788382932791	0.5157604936662947	0.8860668684139174	0.327372403173665
32	B-3	1	2D	0.92	0.625	20.0	1200.0	0.0	0.0	0.284039335348774	1.03120400574734	0.971665358706347	0.283476574776967	0.0704880204283029	0.0422928129982159	1.5888577648208977	0.0694044345522792	1.0515747346679486e-08	0.100000000001699	0.0486313652691056	1.7526245270629865e-08	0.0104995210942897	0.2921102056977771	27.221288521115927	1.4009548255121201e-08	0.3358896489746714	0.978433781039846	0.427994533574357	0.5352582125728644	1.992967929875036	0.1778381409676935	0.0626680175311855	0.6506192733414248	0.1705379188284456	0.6154789857562231	0.5202376832104063	0.8696612312688574	146735.27920899642
32	A-3	1	2D	0.92	0.625	20.0	1200.0	0.0	0.0	0.179539351313017	0.88428587805602	0.761645064830071	0.266571876965164	0.0206899852837517	0.0512075081993423	1.5091236188770212	0.0705376383511133	1.874990073557785	0.1	0.0807156419859883	0.7575747852848947	0.0058749720567725	0.049216884020256	7.777381806185787	5.444264115942089e-22	0.0775779281190629	0.9283785777130312	0.4238788999212122	0.5339942525361671	1.9952832185442309	0.208004313968646	0.0690008753193834	0.6597802170276043	0.1798573887946473	0.8417064298949488	0.5237264469705093	0.6344186447557653	0.2339521643400078
32	A-2	1	2D	0.92	0.625	20.0	1200.0	0.0	0.0	0.227946327357497	1.08516924001615	0.738592990743109	0.284400229541405	0.0870712117639314	0.0522427466287246	1.6003455558315969	0.0679821797239593	2.247627589210621e-07	0.1000000001673853	0.0489004184876816	3.746044578732177e-07	0.0144399237179011	0.3938905012794457	26.677879646354352	2.0832522650477976e-12	0.3686906143693661	0.9780041554630076	0.5005324649163352	0.6222164358861495	1.9981533776105864	0.1372037561007042	0.0624609401171585	0.6431090478619684	0.1584830759779212	0.5824089671429523	0.5173392060560222	1.0683496837943198	18412.944780385853
32	A-1	1	2D	0.92	0.625	20.0	1200.0	0.0	0.0	0.321141921066831	1.1757450707524	0.960586135930324	0.284346259838867	0.0899956258247115	0.0539973761750605	1.5885599045613696	0.0731439704680114	7.558518375378898e-09	0.1000000001157072	0.0658292148565308	1.2597530466933722e-08	0.0091299895535816	0.2426324133674301	25.975322123150377	6.668288544487676e-08	0.2957977294848672	0.9774226631301176	0.429560324143339	0.5236348344962921	1.9909477580936843	0.1888532953422295	0.0635505287415448	0.6190018608924449	0.1720476930612067	0.638373055658602	0.507794024563069	0.8202646240387828	104977.22727066369
33	B-3	1	2D	0.12	0.8409090909090909	20.0	1200.0	5.933	1.87786	2.22305092211406	6.61040940123468	0.713427757373164	0.471379890404354	0.1852446073008088	0.2605570702632007	1.482041940251874	0.065180627844353	0.8065568442707541	0.1968117577189878	0.7020954702927147	0.5734264118482343	0.0022366104554611	0.0013419662732775	3.8377927153971063e-13	18.56330800136339	0.0036160540214933	6.39632119232442e-13	0.0999282288510053	0.109214410691105	1.971239564585343	0.1295398407697365	0.0899999999999999	0.4929285142634282	0.133072528240959	0.2942884756857919	0.4510162447318287	0.3711134472275833	0.0425278323711896
33	B-2	1	2D	0.12	0.8409090909090909	20.0	1200.0	5.933	1.87786	1.89853252743551	6.87585630785807	0.697216723655073	0.396025776706057	0.1882706301757837	0.2644175768561731	1.4820117711770668	0.0652428955445218	0.8044547288618137	0.1962063022925618	0.7014951634116847	0.5727879385003409	0.0022316189383713	0.0013389713630229	3.9868924125852776e-14	18.852537237849685	0.0035522673881026	6.644820687641682e-14	0.1024681641646709	0.1111777353618798	1.971460738184008	0.1298762340955821	0.0899999999999908	0.4849978260878398	0.1327786378817865	0.2949525692002126	0.4470035003080045	0.3769342835810759	0.0420251464881972
33	B-1	1	2D	0.12	0.8409090909090909	20.0	1200.0	5.933	1.87786	2.16809673542324	6.64764909383914	0.707751410016247	0.460818414922686	0.1863406660749406	0.263029964395612	1.4822626060079431	0.065206685485188	0.8115542781725873	0.1972793354463148	0.7032110923266581	0.574936643047998	0.0022335323654671	0.0013401194192802	1.3306444146001652e-16	18.459731428096976	0.0035828117258262	2.2177406910002748e-16	0.1006973659384743	0.1096711781415223	1.9716792238506864	0.1280600122195339	0.0899999999999999	0.4891166528480101	0.1325282368565491	0.2932060959475156	0.4490948252136109	0.3740412619564147	0.0418357592296241
33	A-3	1	2D	0.12	0.8409090909090909	20.0	1200.0	5.933	1.87786	1.06836111575473	6.45801251853225	0.510563276938454	0.324018357487201	0.1849871450732828	0.259664619918594	1.4819897612352255	0.0652757321676091	0.8036900770360431	0.1961991350341577	0.7013875856788219	0.5725552172692366	0.0022249425416933	0.0013349655250163	1.7336606077259994e-13	18.789170565822165	0.0036059138393564	2.8894343462091654e-13	0.0999744466251132	0.109216006078848	1.9714156167295576	0.1292997280671864	0.0899999999999999	0.4924392158767227	0.1331779680505746	0.2950065004818216	0.4507703574898877	0.3702155915224584	0.0416207196977521
33	A-2	1	2D	0.12	0.8409090909090909	20.0	1200.0	5.933	1.87786	2.16264341583885	6.83715837537499	0.709926985137392	0.445549122696483	0.1885660303718959	0.2648117506201169	1.4822299688437188	0.0653265613719826	0.8043449400607666	0.1966702743342109	0.7020839231553431	0.572754539939427	0.0022368098099965	0.0013420858859979	4.851820933320169e-17	18.816936962545785	0.003558214172318	8.086368222200279e-17	0.1022445574083755	0.1110257881603863	1.9715818098721352	0.1291581882745632	0.0899999999999999	0.4858845788430349	0.1326591036758302	0.294357862672339	0.4474550871334087	0.3771796246665012	0.0415666446439027
33	A-1	1	2D	0.12	0.8409090909090909	20.0	1200.0	5.933	1.87786	1.74650125466235	6.50031497034965	0.67326324543233	0.399070472277663	0.1866486417915339	0.2623849277641621	1.4822194955739847	0.0652446568513609	0.8057692852499683	0.1968528810550626	0.7024827214715625	0.5731874310418509	0.0022378112933906	0.0013426867760345	6.130752845700957e-14	18.901191396254337	0.003594773025074	1.0217921409500553e-13	0.1007387461453316	0.1097832487797117	1.9714734000429823	0.1291067919871133	0.0899999999999999	0.4897817670008716	0.1328820479567947	0.2939225055033632	0.4494310529242685	0.3735108633199084	0.0425040285630621
34	B-2	1	2D	0.2	0.7375	20.0	1200.0	4.367999999999999	5.97097	5.94329733284305	11.6205913823433	0.764616793844872	0.668891065480204	0.1613332950668041	0.1933602396519664	1.4895527645498368	0.0656542577995738	0.5985141664149407	0.1830816520346744	0.6781327312987326	0.4993801351595602	2.3457196810627856e-05	9.815215732780144e-05	3.584308897614365	25.595360012540088	0.0003442289410241	0.8566071447683791	0.0973111217121901	0.0916778812646372	1.9703389298594776	0.1965728464751399	0.0763941190060834	0.3421110316227385	0.1377509937566666	0.3215230397602434	0.3631323911295992	0.2851362730739315	1.804742370460077
34	B-3	1	2D	0.2	0.7375	20.0	1200.0	4.367999999999999	5.97097	6.06868069814558	11.447047862106	0.766626006655559	0.691539897399257	0.1608339881610882	0.2060403720358794	1.4889832690124198	0.0655318930757828	0.6810748175287016	0.1863069373054738	0.6661442823009713	0.5316432796973958	0.000521472870315	0.0012098184474341	1.7200026622730404	33.574396144484794	0.0039114355765196	0.7413796071198705	0.1036619143934037	0.1020527300854591	1.9698186675794	0.1889592860501016	0.078797263915742	0.3844766101671858	0.1414587729134379	0.329944282122509	0.3905391008750256	0.3093029205687727	0.2325203383827272
34	A-2	1	2D	0.2	0.7375	20.0	1200.0	4.367999999999999	5.97097	6.15274848102465	11.6065793846472	0.771627834567889	0.687000463962427	0.1617599042735509	0.2116560977534355	1.4892094142422931	0.0655877731868568	0.7084583519257378	0.1878760991891298	0.6638300477172493	0.5414450913802924	0.0006469113716563	0.0013534049520949	1.4921025837430275	34.0926359212651	0.0042447672590873	0.713207179866617	0.1062516053158299	0.1058312886706199	1.969812225347444	0.1902092052040573	0.0791852105280535	0.3960441384018569	0.1434877172819093	0.3319251850236633	0.3976170564462193	0.3188407913761505	0.1966262893946564
34	A-1	1	2D	0.2	0.7375	20.0	1200.0	4.367999999999999	5.97097	6.1470510780223	11.6450803926133	0.769253700462396	0.686206356473508	0.1599804547454759	0.2426158689301837	1.4887329704620629	0.06521978818961	0.9165344373859806	0.1967656762447533	0.6359041515672721	0.6043611109588729	0.0026694789651422	0.0016016873791113	9.739132218545204e-12	15.14778073057895	0.0041980751645841	1.62318870306452e-11	0.1270765254334948	0.1373114340774227	1.9696820443527083	0.1904274365816633	0.0820478747571261	0.4805413006770029	0.1479357569195514	0.3598977732681436	0.4447227518058998	0.381528990386718	0.0340412015858967
34	A-3	1	2D	0.2	0.7375	20.0	1200.0	4.367999999999999	5.97097	5.5430939240228	11.2082049383034	0.764948889573815	0.646522666826882	0.1651465658576697	0.2131820460237481	1.4886650930663765	0.0660636613685512	0.6908657525914126	0.1808466387622373	0.6548366164831511	0.5351956632240803	0.0011597987117924	0.0221814468471831	18.52525563414496	34.15070677098983	0.0681353044172029	0.9686278703156886	0.0959236080130362	0.0901864850283778	1.9685897972227369	0.1590871637278476	0.0778132065315474	0.3401907090079569	0.1340743123039544	0.2770280790996461	0.3618316004918933	0.325549977899309	0.1821385320679669
34	B-1	1	2D	0.2	0.7375	20.0	1200.0	4.367999999999999	5.97097	1.79558368763442	11.3311643462646	0.533743351425925	0.296892095114816	0.1587336364570445	0.2403333796512559	1.4885334742159675	0.0652241530859714	0.9140671190777734	0.1966687909350542	0.6353249582649826	0.6037163792543998	0.00264657426039	0.001587944556234	5.020158236670461e-18	15.041826394363374	0.0041977556774695	8.36693039445077e-18	0.1260041696498201	0.1363628538729454	1.9693773992353163	0.1902082909070127	0.0822349311529035	0.4822090590487068	0.148163761170959	0.3604772860575477	0.4455784721231058	0.3782841780804355	0.0357902083618262
35	A-1	1	2D	0.74	0.0769230769230769	20.0	1200.0	0.0	0.0	0.957343977098305	3.55484494425633	0.963384331330599	0.279542450823681	0.0384593640258418	0.0462029878978623	1.5466618683457525	0.0851950932667672	0.6013456038123084	0.1	0.079193457274128	0.500560040261536	0.0076005682183692	0.0569906843448067	6.898213647641502	1.0107930124661184e-41	0.0976839276208928	0.9199809410353724	0.4024135710084436	0.4802255834406727	1.9845881714551072	0.2435308831340253	0.0670952665954278	0.5933632909974512	0.1846961113009712	0.8231226151049792	0.4972193258110858	0.5834192556833417	0.2505417496221221
35	A-2	1	2D	0.74	0.0769230769230769	20.0	1200.0	0.0	0.0	0.970412295777905	3.61300728645136	0.959327469796114	0.279975850659895	0.038518368842449	0.0465517822994572	1.5456988824083508	0.0851950932667672	0.6085605828706588	0.1	0.0801016527189271	0.5035416440813936	0.0076231005817104	0.0551407178658786	6.633371418209285	3.376829905133714e-40	0.0948806343171192	0.9170511279858296	0.4009027333252349	0.4794663238954517	1.984398047618086	0.2432356086888266	0.0672164927158305	0.5959667122211451	0.1849374462576283	0.8250177129639538	0.4983137959703894	0.5811588240607876	0.2477281175832409
35	A-3	1	2D	0.74	0.0769230769230769	20.0	1200.0	0.0	0.0	0.968482065797261	3.58875726383462	0.960033711638992	0.281100109515763	0.0265132933583454	0.0460921196676529	1.5126440152269471	0.0783049058694459	1.1384531994832237	0.1	0.0822754740551055	0.6548656011111733	0.0071313352846123	0.0357744068432668	4.416508888659176	1.8622576296568232e-24	0.0638581237593986	0.8803949094246759	0.396578315736425	0.4783504785808026	1.9850549704536544	0.2524646676986741	0.0680900704344291	0.606194236042712	0.1887627720359632	0.8538664021854958	0.5025676776830879	0.5602170050917225	0.1636395588045944
35	B-1	1	2D	0.74	0.0769230769230769	20.0	1200.0	0.0	0.0	1.04355511437527	3.85450077270656	0.963046451928891	0.281125355893474	0.02606887294604	0.0471764673581843	1.5038649275610156	0.078670993840804	1.2096857296376031	0.1	0.0855570885257479	0.6684507203799676	0.0069428175734698	0.033547247045633	4.231935549311446	6.473903019450093e-26	0.06083975647194	0.8758261583009941	0.3916051617747346	0.4706796604782866	1.9850359155975563	0.2556646895721472	0.068329036344211	0.6019240460089709	0.1904827940118439	0.8536031550023121	0.5008004024943837	0.551403374882104	0.1432124329275246
35	B-2	1	2D	0.74	0.0769230769230769	20.0	1200.0	0.0	0.0	0.832630447410741	3.48540649159314	0.884331111816513	0.270136922549396	0.038123727818148	0.0458732568708048	1.5470397229512882	0.0851950932667672	0.6032731187679862	0.1	0.0789791211950575	0.5013600897073714	0.0076549362929801	0.0580743048884179	6.986517074175287	1.7984915774332366e-44	0.0999854354579338	0.9209123245708606	0.3989794577856721	0.4768800820114655	1.9848854044528423	0.2430814629275256	0.0670395985523699	0.5952497119980571	0.1844509434755941	0.8210354433470087	0.4980128470418111	0.5808276437706883	0.2508943923407294
35	B-3	1	2D	0.74	0.0769230769230769	20.0	1200.0	0.0	0.0	0.85414952917923	3.65297736454557	0.862056975620086	0.27123826283946	0.0266258432689793	0.0460580350611841	1.5132521865958	0.0785634406156099	1.1298244639952657	0.1	0.0825343525317373	0.6531439966953537	0.0071850066321834	0.0374291236130756	4.609337378398691	1.7175978832849265e-25	0.0670716516484439	0.8848222035900399	0.3940695091803562	0.4745596866496099	1.9851730684926647	0.2522932480651551	0.0680428663501506	0.6042537562387637	0.1886740746084474	0.8503939958198186	0.5017661378329636	0.5580468453238698	0.1625804753957668
36	B-1	1	4D	0.48	0.0769230769230769	20.75471698113208	3394.0	2.175	5.77548	5.66330962008483	11.4785361375664	0.954404278085479	0.516953431480267	0.0284218336645538	0.0284670859740824	1.5527073659716726	0.0800532031226644	0.4015921671368099	0.1009308566375679	0.1181048831360818	0.400953781702204	0.0072216325281706	0.1658867412396751	22.37080896771925	6.546766082885162	0.6882346231635594	0.973879892482534	0.0739076465305575	0.0466784249521611	1.9676434451484268	0.1100523556156808	0.0560239629727213	0.0315777479514476	0.2499940648713576	0.1936604937003586	0.049998195873543	0.2410322521659188	0.030235177357175
36	A-2	1	4D	0.48	0.0769230769230769	20.75471698113208	3394.0	2.175	5.77548	5.62827244755169	11.4496963262989	0.960760286868753	0.511641897255014	0.0365172665696183	0.0445292825274379	1.5255963943430633	0.0851950932667672	0.6194034962213016	0.1010861385462297	0.1477943575821317	0.5079561426063766	0.0090042510448022	0.1977994793642674	21.367343911234947	8.762921997579797	0.656503885161611	0.9726867297919828	0.0807256149142797	0.05896340687524	1.9705694181308808	0.1102824203643333	0.054661938475288	0.1304175624781755	0.2464383838829088	0.1957017572562573	0.1785520627895257	0.3012921687669454	0.0257253124574902
36	A-1	1	4D	0.48	0.0769230769230769	20.75471698113208	3394.0	2.175	5.77548	5.91701198650552	11.3575460277628	0.965332035201531	0.539686090191489	0.0278519138501395	0.028684948409273	1.5519959877467184	0.0790108345511328	0.4299094189223684	0.1016057767276684	0.1188913372353703	0.4174244948378064	0.0072635962130948	0.1651950778294058	22.14287735482749	6.5689596141138935	0.6846888280088366	0.9736181138982996	0.0739552455069652	0.0473902721387817	1.9679051515732315	0.1119431464144179	0.0561863559492128	0.0407966306368138	0.2499846225392868	0.1964198347557931	0.0636654886844064	0.2412702983774605	0.0252636499838581
36	B-3	1	4D	0.48	0.0769230769230769	20.75471698113208	3394.0	2.175	5.77548	5.79717996032707	11.3979984191705	0.962928419558744	0.528194877857248	0.0326785726723714	0.0343056294708952	1.5467427779886962	0.0851950932667633	0.4497897143439013	0.1026902618914701	0.1315517772208129	0.4284569644740817	0.0079072553534715	0.1769733313450605	21.781132698258347	7.383971843916348	0.6786395299605905	0.9731917053489124	0.0749775948546328	0.0494976717438033	1.968644795250049	0.1082482011747765	0.0553072716039254	0.0601661715045648	0.2499998984870192	0.1898086928185965	0.0911379196656531	0.2607766325597589	0.0294633986381955
36	B-2	1	4D	0.48	0.0769230769230769	20.75471698113208	3394.0	2.175	5.77548	5.78229994024448	11.5841287348507	0.96251745084347	0.51859536189488	0.0340775337236834	0.0384160598759745	1.5378200319296127	0.0851950932667667	0.5273133844564555	0.101786692615828	0.1382606955730879	0.4677611316667764	0.0083615208680301	0.1862583807017243	21.675658177673697	7.922165938108788	0.6703501961231291	0.9730647689413118	0.0776432745610977	0.0531779144733207	1.969636516456156	0.1091313941608072	0.0548666443321642	0.084900460135474	0.2497835525296047	0.191389108303783	0.1239602906949145	0.2778523550510197	0.0280155166518264
36	A-3	1	4D	0.48	0.0769230769230769	20.75471698113208	3394.0	2.175	5.77548	5.86479038608828	11.3531023453843	0.963937766987873	0.535906402274364	0.0332044823958646	0.0362539422506512	1.543133110801359	0.085195093266767	0.4918388011121778	0.1031075547801868	0.1351482714429557	0.4504683297673402	0.0080875770683732	0.1808602483799484	21.7627233287468	7.685528132939434	0.6742149521919808	0.973169636310408	0.0765285324661661	0.05113890549541	1.9690525256580536	0.1097858715064536	0.0552058252595386	0.0682331915618385	0.249656926693042	0.1906367763650636	0.1021098509075244	0.2682530961260097	0.0304643276687269
37	A-3	1	4D	0.56	0.8863636363636364	21.782178217821784	2977.0	11.755999999999998	11.78864	0.0108079379665762	6.10735099662247	0.0083788104189215	0.211206655335272	0.2665437584823097	0.2670637124510257	1.5179325715073395	0.0657570952771333	0.4019507264836234	0.1062022998182358	0.3423407527609077	0.4011681571351136	0.0067840097475584	0.3324782740527272	48.40910912935925	4.111411877295273	0.4261936658157201	0.9877573779515904	0.2278713420081493	0.1805687958007545	1.9753377384156428	0.1421772553867613	0.0597413798394834	0.192415554362676	0.2268228942145355	0.2314655814233722	0.2428215262854501	0.7801107823045075	0.0747724089256263
37	B-2	1	4D	0.56	0.8863636363636364	21.782178217821784	2977.0	11.755999999999998	11.78864	12.4648663152365	21.8351163176939	0.823193039188337	0.693474387842874	0.1432447264546167	0.2486737176636172	1.519913115380236	0.0494067757169905	1.1360060912427576	0.1211425213179033	0.2800759407239524	0.6543790928921932	5.128929957920445e-17	2.5940761864010265e-15	49.9773369432561	49.97969807105229	2.92165306025088e-15	0.9881369792032912	0.6236317725065373	0.6392058946330831	1.977615580723228	0.3498520166813916	0.0742457948475729	0.4249732659770514	0.2260619289905908	0.7199240592760446	0.4146188784465002	0.8878796122967029	0.1171977556546521
37	B-1	1	4D	0.56	0.8863636363636364	21.782178217821784	2977.0	11.755999999999998	11.78864	12.8944676482138	22.017467573623	0.824929344027399	0.709936163094138	0.256263408351284	0.2568803230018928	1.5181063148510714	0.066185941520741	0.4024073458422244	0.1064563308338278	0.3430957211044408	0.4014409386676241	0.0068635753311828	0.325956736750629	46.890807782021504	5.544745658118299	0.4353558900012882	0.9873659761115466	0.2153856202591595	0.16587622112135	1.975354598990393	0.1401016293757823	0.05934388676198	0.1701360050023856	0.2270751502176397	0.2215483888942708	0.2209168301407472	0.7487132808738718	0.0735215498677684
37	A-1	1	4D	0.56	0.8863636363636364	21.782178217821784	2977.0	11.755999999999998	11.78864	12.7874800703225	21.9990928767167	0.824970275180487	0.704598794833872	0.2625668267042858	0.2628503414526476	1.5184067784366715	0.0658405847091049	0.4010797812957579	0.1057941608689925	0.3385307526633361	0.4006471699754201	0.006687281077978	0.3292322341412575	48.632599961359006	4.189487387903912	0.4240254564970776	0.9878129531962374	0.2306566030935405	0.1843619257836356	1.9755560373256589	0.1459110440027314	0.0600072545360846	0.1992917753534652	0.2266270677379132	0.2374437908395862	0.2493354510814701	0.7764445013775407	0.0725934177958027
37	B-3	1	4D	0.56	0.8863636363636364	21.782178217821784	2977.0	11.755999999999998	11.78864	8.30064962315898	21.8006403373275	0.799419219749353	0.476286472512512	0.2681861376107287	0.2684300012445009	1.518504856991944	0.0658310389796409	0.400909307378617	0.1063549775301626	0.3393160613030925	0.400545088773926	0.0065891728334097	0.3298326336312715	49.456758559873975	3.186795711371322	0.4169336870473293	0.9880136066085397	0.2388060096635797	0.1928287158066435	1.975769383537808	0.147874491359432	0.0603101624421657	0.2074701138312761	0.2224454323105117	0.2437502516495781	0.256938443017877	0.791091350682416	0.0728914347421037
37	A-2	1	4D	0.56	0.8863636363636364	21.782178217821784	2977.0	11.755999999999998	11.78864	12.4957558345519	22.0061692827916	0.821438242673026	0.691262763494355	0.149112568679509	0.2561612461546489	1.5198224394175768	0.0491728861820511	1.1179051264633642	0.1201153294046013	0.2794618062503422	0.6507374064159092	1.6567874492402502e-19	9.942447451540646e-20	0.0001039817207655	3.529126843226926e-05	1.0846817639539476e-19	0.0001732728392625	0.6318350579083418	0.660462208018475	1.977360380478308	0.3514602781393531	0.0736344058510382	0.4453079482561508	0.2339557933279431	0.7205381937496578	0.4260064691931616	0.916623454173124	5858.877018727328
38	B-3	1	4D	0.09	0.989010989010989	22.0	3500.0	6.194	0.62616	0.681461959544362	4.66433279986778	0.453263692412615	0.322330317255479	0.2018516913855069	0.2710412709962962	1.4813718419079551	0.0650087876431967	0.7427743366224631	0.2065552315206902	0.7842092997799821	0.5531639355655208	3.935817713474553e-12	1.0487351875078796e-10	26.04592884770703	0.99921156235225	3.0343271488769715e-10	0.977482488847386	0.0984799890260811	0.0745823667112608	1.98233001802006	0.4708793903964926	0.0878352623970056	0.1573352459605639	0.1	0.2157906999165854	0.2077484796855165	0.3456236378124305	3882.162313453478
38	B-2	1	4D	0.09	0.989010989010989	22.0	3500.0	6.194	0.62616	0.0009638796564193	1.29865891647485	0.004135174636908	0.17948735475007	0.1978718176241001	0.3029113774237464	1.4818180391979072	0.0647838219214357	0.9308464897168502	0.2211943579391562	0.7632433874729253	0.6080599824800346	0.0010693418572289	0.0006416051143373	3.0904300258908196e-16	11.245056604227193	0.0016166473014374	5.150716709818031e-16	0.1203255606744011	0.0933209143019221	1.984469806841731	0.5258536601837104	0.0883544106188134	0.1755701596475157	0.1	0.2351399652256372	0.2263755992459915	0.3968738968400059	0.0443633830777225
38	A-3	1	4D	0.09	0.989010989010989	22.0	3500.0	6.194	0.62616	0.129247682723911	4.19039146583611	0.120584634783012	0.255785661923258	0.1983687399494471	0.3030403900762288	1.481631177524492	0.0647549743063693	0.9276620205051284	0.2207143761685374	0.7633090083813177	0.6072429687021954	0.0010526203856883	0.000631572231413	2.855747627710849e-18	12.08585353925639	0.0015908267988956	4.7595793795180825e-18	0.1203856696994546	0.0933368332768095	1.98480807813342	0.5222572245785432	0.0883773786272147	0.1753151476403034	0.1	0.2351001648197867	0.2261211433491023	0.3970087955844513	0.0439979321192949
38	A-2	1	4D	0.09	0.989010989010989	22.0	3500.0	6.194	0.62616	0.572650792799743	4.55259898713628	0.413136577872409	0.304464611526991	0.1970859220351275	0.30227895816166	1.4820152957240496	0.0648073745671297	0.9337420097808072	0.2197259087431143	0.7599475075850377	0.6087999179954989	0.00106936613455	0.00064161968073	1.5906232502833425e-15	12.510427516773426	0.0016130705231805	2.651038750472231e-15	0.1224452260577836	0.0948423664986507	1.984378096939164	0.5193355262797598	0.0886081395416578	0.1745697366256912	0.1	0.2384394218917817	0.2253763972062487	0.3977629443410408	0.0415075565957158
38	B-1	1	4D	0.09	0.989010989010989	22.0	3500.0	6.194	0.62616	0.698087114403463	4.48012319982544	0.471429944549857	0.330523619469381	0.1959618544168424	0.2985238943775701	1.4816721015063443	0.0648307724844413	0.9233775739974468	0.2198560778272242	0.7622878672416489	0.606138353195289	0.0010709267602263	0.0006425560561358	1.2748684622972905e-17	12.051589669461029	0.0016407821780438	2.124780770495484e-17	0.1193159117088139	0.0924492464785166	1.9840876750806795	0.5252642905899365	0.0886753227333822	0.1748274740098004	0.1	0.2360713505803073	0.2256340667749593	0.3916156969122226	0.0437866934796121
38	A-1	1	4D	0.09	0.989010989010989	22.0	3500.0	6.194	0.62616	0.552436771847924	4.54575180095012	0.361675543460941	0.336014266167459	0.1987276561792276	0.3038355642681245	1.4818383729297042	0.0648144781732517	0.9289042809124792	0.2203632013885677	0.7628896544374358	0.6075620903867778	0.0010491231738296	0.0006294739042977	1.6522528278729335e-14	12.645441210475594	0.0015805231046071	2.75375471312148e-14	0.1210701729885394	0.0938043085159615	1.9844383896748	0.5236783252879351	0.0885621799283256	0.1747928841634765	0.1	0.2355298224579569	0.2255994959894292	0.3982693466883837	0.0440895782355459
39	B-3	1	4D	0.64	0.9722222222222222	17.6	800.0	3.657	11.00916	11.0223004944926	21.8008665030582	0.821619163244751	0.615358113502415	0.3680235360516383	0.3484715819132539	1.5217794382391006	0.0645849292745537	0.3468730876613256	0.1	0.3265078514734761	0.366335353894221	0.0113245388057967	0.5730216635733136	49.99999999999999	3.5248582183099383e-19	0.5369048207427545	0.9881422924901186	0.2429589465578298	0.1457753679346996	1.97678452304564	0.0992353675231999	0.0531656014327467	7.288282443321205e-15	0.2499999999999935	0.1365873277837693	1.2147137405535194e-14	1.0672686134212672	0.0765554552915841
39	B-1	1	4D	0.64	0.9722222222222222	17.6	800.0	3.657	11.00916	0.0	0.120830905198007	0.0001393318978354	0.0	0.0153239973033094	0.0145524991428552	1.4613902725786865	0.0851950932667672	0.3496542484846595	0.1	0.58945818940944	0.3681911064396273	0.0012399299307871	0.0021908071799542	1.166879825671716	31.29187515403529	0.0887400315893555	0.6604183310701974	0.009379759754481	0.0079446179512343	2.0086930092033555	1.110951513243689	0.0844757669818475	0.2469958889340334	0.1	0.3218017790012046	0.2916140351576963	0.0246879242740438	0.0092169435301683
39	B-2	1	4D	0.64	0.9722222222222222	17.6	800.0	3.657	11.00916	10.9960189527802	21.8546805703217	0.82164153113239	0.61236256471359	0.1703649592534271	0.3119741858708079	1.522180553612185	0.0457126075782723	1.231210991027382	0.1125759195181756	0.2518273550899631	0.6723479692182406	2.1021198098594632e-19	5.021640282972203e-18	23.2884589708896	49.99988919365077	4.053496885148645e-18	0.9748832689152884	0.8673252405376818	0.9268673441105472	1.9783754404863367	0.3704033094067525	0.0723801454939297	0.4686502603521066	0.2499999999999909	0.7481726449100369	0.4385440941152181	1.2388415299813549	574228.0923374132
39	A-1	1	4D	0.64	0.9722222222222222	17.6	800.0	3.657	11.00916	0.0	0.441243114672886	0.0005036683332419	0.0	0.0160749734010125	0.015422727014104	1.4596325125781309	0.0851950932667672	0.3594247299427948	0.1	0.5760101881510269	0.3746252506585121	0.0013055594304789	0.0053282058349573	3.481166824403077	31.38552362000025	0.1989985845366058	0.852983221265953	0.007024617431079	0.0060241612922601	2.0269352398380738	1.4999999999999998	0.0713700332402798	0.2575785587421951	0.1	0.2249912273123672	0.3003556421932748	0.0267750941413215	0.01251628307978
39	A-2	1	4D	0.64	0.9722222222222222	17.6	800.0	3.657	11.00916	0.0	0.972938381447087	0.001649835445037	0.0	0.452854061538061	0.5393642204870228	1.5083058626918977	0.0703502364276756	0.5910331965559525	0.1187013564519429	0.3977979726892359	0.496235703811625	0.0200539092169248	0.6266999258516479	30.65076108965	5.30263998225744e-14	0.4622107854376637	0.9808004676020924	0.1941862286814048	0.1898105878656185	1.9455803639550813	4.800679047731564e-19	0.0683535158182097	0.3774667810096602	0.2499999999999961	0.1399912418731005	0.3861683980909933	1.3558747342042892	0.3594590503173969
39	A-3	1	4D	0.64	0.9722222222222222	17.6	800.0	3.657	11.00916	0.0130795830223515	6.50966928908289	0.0120548803572374	0.166675615973558	0.2004506725585337	0.3709362907997328	1.5230268068839403	0.0461374388867852	1.250511580056762	0.1136385122930301	0.2498457664069972	0.6757653362095709	3.131327362754749e-15	4.182103356148326e-14	12.755688727700347	46.41361298972515	2.8168740673968752e-14	0.9550753231650592	1.0527070764698625	1.1137248108635611	1.9810839121667057	0.3718500293951617	0.0721130336643858	0.4579626904364652	0.2499999999981485	0.7501542335929747	0.4328722501996092	1.4846611016633358	0.5056333880691375
40	A-3	1	4D	0.48	0.9807692307692308	22.0	3117.0	12.509	13.65699	13.594600082363	22.6688537025619	0.811483478342636	0.739021706279266	0.2570262374660645	0.2805588545695527	1.5122456801126989	0.0651305072796074	0.4915572563154968	0.1264585785077172	0.4586081725550442	0.4503265893488048	0.0043120972800387	0.2181921223699628	49.99999999999999	5.503369920125898	0.3566620296462197	0.9881422924901184	0.1778924313197172	0.1130105906890655	1.9738263751912672	0.1513992679362605	0.0631308570768511	0.0352748672368037	0.1	0.184729797798736	0.0555269365373064	0.6117615676285811	0.1138825010578215
40	B-3	1	4D	0.48	0.9807692307692308	22.0	3117.0	12.509	13.65699	13.9180741585932	23.1962966306421	0.811628131411195	0.73927054177289	0.2516983333793907	0.2771285917877855	1.5118858503009591	0.0653258463312345	0.5010346714138277	0.12835590288352	0.4598365433092487	0.4550580326144081	0.0041330183360298	0.2091307278031108	49.99999999999983	5.804091770421247	0.3470084062866023	0.9881422924901184	0.1810767200597068	0.1164082931077563	1.974063063737049	0.1614240726717838	0.0638702692969746	0.0428672502427303	0.1	0.1931550504041489	0.0666813408624327	0.6026676126986527	0.1102887729949989
40	B-2	1	4D	0.48	0.9807692307692308	22.0	3117.0	12.509	13.65699	13.561538485624	23.0440574817022	0.811016463663596	0.725638539253504	0.1864446336226128	0.2988351832301747	1.5113588804112303	0.0563511434239669	1.0028092491793266	0.1413136574065829	0.4039387366037301	0.6256572637653462	5.058964349979368e-14	2.4014339564940428e-12	46.868884743254526	49.21957836813154	3.246044150284484e-12	0.9873601412115488	0.5164846774695813	0.4409680496604762	1.97594201892762	0.3395090127083203	0.0809348927350824	0.253787283334165	0.1605714552126596	0.5960612633930238	0.2972488443996124	0.7398032328930524	741687.7275796112
40	B-1	1	4D	0.48	0.9807692307692308	22.0	3117.0	12.509	13.65699	13.7899132291036	22.8219118228132	0.812837408043601	0.743371365398472	0.1834400572499362	0.294726665487489	1.5111660619602705	0.056938087380349	1.0066647051135906	0.1434129997068472	0.4068099817668425	0.6265555606652975	4.6839365084079786e-14	8.097375555443437e-13	16.687543374911478	5.386941352495192	1.1176773559394993e-12	0.965292928729784	0.5069096181624062	0.4297557186642305	1.9762212590604995	0.3407728873693574	0.0811294619402605	0.2477955502642353	0.1578521215185255	0.5931900182320399	0.2922822019849054	0.7244823841525293	231621.5551314505
40	A-2	1	4D	0.48	0.9807692307692308	22.0	3117.0	12.509	13.65699	13.4921248976975	23.0173872156533	0.810632507470497	0.723103249990594	0.2689937121457569	0.2861898427101056	1.51210567006774	0.064827096906269	0.4639276302303705	0.1223945050382624	0.4595672284173686	0.4360518676725381	0.0047659482314193	0.2411569805098173	49.99999999999999	5.530627582629646	0.3872528951303858	0.9881422924901184	0.1589848087411644	0.0953908852447773	1.9729129343522431	0.1156029647614489	0.0606557788264975	4.951701488697e-13	0.2499997976180022	0.1531798764522456	8.252835814488187e-13	0.6227377084647003	0.0839735378972469
40	A-1	1	4D	0.48	0.9807692307692308	22.0	3117.0	12.509	13.65699	13.5857107764143	22.6226262022165	0.812363609981675	0.73924583145637	0.2513382498462153	0.2764177941495246	1.5119376758652148	0.0653524629550222	0.4997840333441274	0.1284547688376438	0.4598113879997615	0.4544383426120743	0.0041104752766993	0.207990049000985	49.99999999999999	6.238758567637987	0.345984213554458	0.9881422924901184	0.1815825955810408	0.1167468941255232	1.9742128864076205	0.1633509669874678	0.0639101822642738	0.0429409919598757	0.1	0.1942043984457806	0.066788387265492	0.601154737276033	0.1113699492406118
41	B-1	1	4D	0.41	0.5254237288135594	22.0	3500.0	8.631	10.73912	11.5632453338337	19.4293264285694	0.829382540982132	0.717574680399341	0.1384588289749991	0.1782520818530134	1.5076435975337534	0.068934057853201	0.6874013392472041	0.154515086740906	0.4309285372722929	0.5339448688543043	0.0057426394396497	0.1499184982498323	25.50620078543132	13.754067407466684	0.3624314425350253	0.9770169545185284	0.1272769545236216	0.0854759214292177	1.9675519937118984	0.193081793375658	0.0664123660289058	0.0715742197724736	0.1	0.2066400201926818	0.1065767828263608	0.4136465015320635	0.0090286674989067
41	B-2	1	4D	0.41	0.5254237288135594	22.0	3500.0	8.631	10.73912	11.3355843846201	19.4415677157995	0.827896666653114	0.704265636029755	0.1404378639682039	0.179617110508133	1.5078537514689585	0.0689839307207444	0.6789792256367521	0.1536092251143513	0.4306672373514892	0.5308758829125748	0.0058565735389792	0.1513147763153931	25.23674145100293	13.47426374455323	0.3628068422983465	0.9767772572583178	0.128212558005732	0.0861351545719132	1.9678782938670432	0.1940486342926256	0.066340994812948	0.0718152723234981	0.1	0.2065259203501643	0.1068973500336221	0.4170670413954394	0.0090596633290233
41	B-3	1	4D	0.41	0.5254237288135594	22.0	3500.0	8.631	10.73912	1.76244084314362e-05	0.0001126099449314	0.908908887218045	0.172193777178673	0.138938742916807	0.1788246355359202	1.507584419409298	0.0689083086827136	0.6870753814362337	0.1547362181059869	0.431312953624165	0.5338268382303557	0.005778733509857	0.1504624961062749	25.437278903694644	13.614039425400536	0.3629053872290779	0.9769561173339484	0.127152164303083	0.08531816605017	1.9676037636121475	0.1930772836845396	0.0662787122320757	0.070992637190222	0.1	0.2057816591467571	0.1058024086337271	0.4146052976923652	0.0091227678950709
41	A-2	1	4D	0.41	0.5254237288135594	22.0	3500.0	8.631	10.73912	11.3395147409579	19.3307833898012	0.828608328710074	0.707938809613691	0.1419802678052859	0.1819147115675673	1.5079361382360974	0.0687501933830767	0.6812675618914042	0.1532616210646213	0.4307366864498888	0.5317137357990385	0.0059923778720647	0.1535318035931606	25.021181919934502	13.37142611459922	0.3635317879160657	0.9765818765943356	0.1293674963117634	0.0868874008725211	1.9681794472226493	0.1934053915247464	0.0661583752460783	0.07163239105386	0.1	0.2057315256340453	0.1066541638074683	0.4223339160332491	0.0093431872656068
41	A-3	1	4D	0.41	0.5254237288135594	22.0	3500.0	8.631	10.73912	10.5832268403036	18.7623610498737	0.825888418107112	0.682981971855658	0.1402722304794611	0.1798040526680734	1.5079484333279265	0.0688651450762594	0.6818221543457995	0.1536757941608397	0.4300109233657432	0.5319163442714715	0.0058898137962825	0.1520523024364422	25.21614762293721	13.442968753730993	0.3636411415669477	0.9767587322181676	0.1284862470222825	0.086281982546833	1.9679543110455764	0.1931350948913264	0.0662538952268039	0.071526988657936	0.1	0.2063479350673091	0.1065139448838602	0.4181383376513488	0.0089619694725328
41	A-1	1	4D	0.41	0.5254237288135594	22.0	3500.0	8.631	10.73912	11.2170462522205	19.180384999212	0.828871054259032	0.70556043092324	0.139422233302571	0.1794304066056606	1.5077664728872104	0.0689023804130059	0.6869569103534929	0.1542649016243334	0.4313120095383376	0.5337839245641908	0.0058076124084469	0.1505602397429472	25.324636348659023	13.71260043022108	0.3619143532501797	0.976855991654786	0.1280153414616452	0.0860200434481292	1.96785191580546	0.1937925919569688	0.0664477052099581	0.0719510526314673	0.1	0.2067736372114828	0.1070778181679983	0.416010689796737	0.008964768750962
42	A-1	1	4D	0.13	0.9885057471264368	22.0	800.0	4.971	9.40023	8.83893400856557	17.7310638200982	0.8128171632093	0.613298966756074	0.3608491607975919	0.5063181566510564	1.497418205251316	0.0591920711744996	0.8031296498845433	0.157915490445901	0.6686639364064682	0.5723844905926041	0.0030245138189103	0.0945561024611117	30.663240349544186	11.727447087886343	0.1248745573358422	0.9808081314255468	0.2178362123108388	0.1563344507998843	1.955283215044308	0.2352183275675149	0.0899999999999999	0.1176697076278792	0.1	0.2064615062576896	0.1639608114668989	0.7572087099120524	0.1362254674742887
42	A-2	1	4D	0.13	0.9885057471264368	22.0	800.0	4.971	9.40023	9.53418572560566	17.4741045363703	0.81689347312676	0.667918160720512	0.3424365410109484	0.4965944685455101	1.4973114490660595	0.0592496139394293	0.850179548828093	0.1636052665623291	0.6725168252348662	0.5862581288745472	0.002629847151377	0.0713525544900568	26.531825685266448	11.494106280383171	0.0966297380609128	0.977885749121342	0.2332677739454071	0.1704649391812624	1.9599894315059088	0.2836333660023839	0.0899999999999999	0.1307693484534098	0.1	0.2308534367042209	0.1789475006445854	0.7384119622168294	0.1260291076777427
42	A-3	1	4D	0.13	0.9885057471264368	22.0	800.0	4.971	9.40023	9.68876427656076	17.8273533881522	0.815998929993447	0.666027140654873	0.3758237350282696	0.5139146904278155	1.497008122523809	0.0591602697708427	0.7674354292422716	0.1540803280780754	0.6660498629654393	0.561222426178855	0.0033105451894678	0.1123863032088918	33.34797435976341	11.546999374884924	0.1456562407063334	0.982325896866732	0.206082901221671	0.1452849175737902	1.952252871844308	0.1938578385597062	0.0899999999999999	0.104982881706988	0.1	0.1882938963282273	0.1489155048031678	0.7715859112104975	0.1445003294545273
42	B-1	1	4D	0.13	0.9885057471264368	22.0	800.0	4.971	9.40023	9.72762463442935	17.6011478607116	0.8173747491821	0.676152402450196	0.3640834530085845	0.5080869833921334	1.497131092514576	0.0591206008144212	0.7955234141886519	0.1574467462749469	0.6685988416327386	0.5700537920756881	0.0030602311376658	0.0964149404031624	30.9057706643371	11.492828472659314	0.1268737825938211	0.9809558697550232	0.2169224788289899	0.1554260804940468	1.954680861886864	0.2318257951607019	0.0899999999999999	0.1165051834788243	0.1	0.2045273757734401	0.162602010655611	0.7599280042893428	0.1405562368135519
42	B-2	1	4D	0.13	0.9885057471264368	22.0	800.0	4.971	9.40023	9.172081625012	17.1440568459617	0.815316493947878	0.656187698867296	0.3394977939421481	0.4975363832740257	1.4970919147568724	0.0592351957263258	0.8655069698591562	0.1657815203493137	0.6746823215802865	0.5905853657880157	0.002540454190421	0.0644002740695201	24.74990566346177	10.41322476051833	0.0873297468894851	0.9763312728668329	0.2390137037327581	0.1755013447500356	1.961253194876002	0.2990633518475071	0.0899999999999999	0.1342731483976506	0.1	0.2379879315302283	0.1828653937443646	0.7374380020935813	0.1261558750526352
42	B-3	1	4D	0.13	0.9885057471264368	22.0	800.0	4.971	9.40023	9.43981273099626	17.3370225671186	0.817073771937798	0.666388654412895	0.3520924162839894	0.5025702192206211	1.4970107918763598	0.059135554432842	0.8273815509143482	0.1611462659722685	0.6716921993519246	0.5796498843524679	0.0027848636231858	0.0803371510762517	28.24778644361329	11.43300014424619	0.1073717375847669	0.9792011771449856	0.227753420390808	0.1653076896748239	1.9576479429879228	0.2665456741151089	0.0899999999999999	0.1258186919483718	0.1	0.2209360630633084	0.1733472743869779	0.7482150599716967	0.136252632863354
43	A-1	2	2D	0.0	0.98	20.0	1200.0	5.773	0.0	0.0010860258336495	0.124901275700281	0.0420546587087402	0.206756498730418	0.2011701431795624	0.2958782289637494	1.4793239047114717	0.064357266102822	0.8707859938224113	0.2109813371457047	0.8045338486472761	0.5920548587489157	0.0022059116803444	0.0013235470109176	1.2289829600009002e-09	17.654744503613657	0.0035989074772029	2.0483049291392812e-09	0.0575673268220966	0.0705617798548756	1.9678195244364247	0.0822667054911313	0.0899999999999999	0.625726184454187	0.121554574946893	0.1918672438755211	0.5104942624137718	0.3677635558295427	0.1010930825908857
43	B-3	2	2D	0.0	0.98	20.0	1200.0	5.773	0.0	0.0010307102828006	0.121821386464895	0.0415642453191357	0.203560341777271	0.2004271789183808	0.2939363874381385	1.4800175384142047	0.0642875906646434	0.8665495419552709	0.2102692862266742	0.8039515136774058	0.5908764192172787	0.0021507245514374	0.0012904349396578	9.7081421867353e-08	17.83830557957366	0.0035294953853186	1.61802343598919e-07	0.0575553503288819	0.0703877481995079	1.96763295326996	0.0840607986783148	0.0899999999999999	0.622957514762734	0.1220041486224429	0.1925189909372754	0.5093860639006694	0.3656145705773043	0.1031128738670691
43	B-2	2	2D	0.0	0.98	20.0	1200.0	5.773	0.0	0.0	0.0159513449509108	6.83732611855311e-05	0.0	0.201918099688437	0.2459092799340553	1.4798390168131723	0.0646403840242688	0.6178664533466657	0.1926784379084182	0.8528842977553955	0.5073351447104767	0.0002066073451685	0.0037878218911601	17.733432860627016	42.64839553152299	0.0131372586448586	0.96727290494032	0.0378720178024443	0.0386295569973641	1.964132585763925	0.0434489204148214	0.0899999998889227	0.4200026098126436	0.1040347471996393	0.1339784435997457	0.4117662109607648	0.2883266588225796	0.7499608606652958
43	B-1	2	2D	0.0	0.98	20.0	1200.0	5.773	0.0	0.0	0.0731364001035355	0.00021431445934	0.0	0.1991887764806652	0.2928630406775858	1.4801320810413576	0.0643342838344209	0.8702788272109964	0.2108832509250073	0.8049696108342711	0.5919141397566385	0.0021732063536938	0.001303925550646	7.999376951937116e-07	17.49014168363617	0.0035839976278055	1.3332277144910108e-06	0.0568391054055689	0.0696517875928749	1.968235554978802	0.0802674164946533	0.0899999999999999	0.6254201943518038	0.121603696038071	0.1914463915379233	0.5103720317606036	0.3638187538211069	0.1006629577315147
43	A-2	2	2D	0.0	0.98	20.0	1200.0	5.773	0.0	0.0005936234801935	0.122974456729941	0.0358678681699278	0.134583120309928	0.1995668660208764	0.292315036998259	1.4793397006355262	0.0643454716271193	0.8647473442193573	0.2105307874587738	0.8050261127066728	0.5903730412156696	0.0021222131814183	0.0012733293413874	6.750200326789679e-07	18.209381194136416	0.0035067076275606	1.1250321220995798e-06	0.056544348643733	0.0695241245278017	1.9680251584618127	0.0793101166462465	0.0899999999999999	0.6295503652513519	0.1215614892050881	0.1914671796657666	0.5120167363966871	0.3631124908674481	0.1021629130833933
43	A-3	2	2D	0.0	0.98	20.0	1200.0	5.773	0.0	0.0002654970211843	0.120416300525861	0.0192462815711701	0.114558557660292	0.2002480149323797	0.2950559548913741	1.4793679340272563	0.0642948937955195	0.8734525832428816	0.2114424158569368	0.8044435996154244	0.5927931398515204	0.0022367292215358	0.0013420375329215	7.427207521416454e-15	17.288276238845047	0.0036589449760464	1.2378679202360607e-14	0.0571865537255862	0.0703846571392409	1.9683675318303704	0.0791452034956854	0.0899999999999999	0.6307903266384381	0.1214218894619024	0.1918974554085291	0.5125083557987222	0.3667826495635365	0.0972597947508822
44	B-3	2	2D	0.43	0.9824561403508772	20.0	1200.0	8.062999999999999	12.67036	12.8299138005209	21.7955125447958	0.788549042082063	0.746496788427185	0.2011533261697397	0.2420424674648693	1.5059488023074248	0.0659357997230515	0.6032735032212501	0.1522356274319683	0.513693525033791	0.5013602490258809	0.0014564513346473	0.0736964375331582	49.99999999999999	0.818216067844771	0.1564080187057891	0.9881422924901184	0.1883854222901515	0.155441780896247	1.9726986907323487	0.1846344067944868	0.0714647434404441	0.2251263765878624	0.1556194616145586	0.3298984562604199	0.2728386620226897	0.4711806858942746	0.5063131014666197
44	B-2	2	2D	0.43	0.9824561403508772	20.0	1200.0	8.062999999999999	12.67036	12.923556981364	22.3039556946642	0.789135172026914	0.734258136631574	0.2066500745631972	0.2445963639849407	1.5071761257907863	0.0656421704250226	0.5836258201307298	0.1480282827729773	0.5043989509156117	0.4930830421275106	0.0016866704830686	0.0853449707701545	49.9996705502781	5.979624483515519e-05	0.1759957221810535	0.988142215285694	0.1924141766613248	0.1549850584123299	1.9731062021564207	0.1827600422620339	0.0707293800399526	0.2054762965055568	0.1546443976709947	0.3196053269033346	0.2550991225899337	0.4849263931674251	0.5492542654897418
44	B-1	2	2D	0.43	0.9824561403508772	20.0	1200.0	8.062999999999999	12.67036	11.7482168420931	21.521654008308	0.785045388825622	0.695346930217702	0.200181192963758	0.2410894720316334	1.5060778857996342	0.0659172878025902	0.6043562557611579	0.1521783817642152	0.5123915645640282	0.5018085411772137	0.0014806227690534	0.0749195121141041	49.99999999999999	1.5459687599816632	0.1592277161878	0.9881422924901186	0.1876712810783113	0.1545090507027986	1.9726277666694667	0.1840387951167911	0.0714638546799299	0.2232961900991407	0.1554364191140903	0.3283807192481717	0.2712221832002545	0.4705180348485362	0.4958608163730302
44	A-1	2	2D	0.43	0.9824561403508772	20.0	1200.0	8.062999999999999	12.67036	12.7461935313996	21.7992374999057	0.787768523936175	0.742233549936622	0.2006869317984946	0.2422372183620569	1.5060393512255257	0.0658340279632295	0.6070403199211893	0.1527275023995445	0.5130934324375578	0.5029163565644804	0.0014265790547993	0.0721849001728484	49.999999999999815	1.223328820401142	0.1528980494834261	0.9881422924901184	0.1901768448058236	0.157689202811108	1.9728740761346253	0.1868348193199261	0.0716435180288976	0.2291714113361886	0.1568343919931062	0.334008518079016	0.2763860502219737	0.4721113213460133	0.5224988997689689
44	A-2	2	2D	0.43	0.9824561403508772	20.0	1200.0	8.062999999999999	12.67036	12.8721138500892	22.2003066274593	0.788944666214765	0.734927257351076	0.2069917301831808	0.2445862647887508	1.5072666388882026	0.0656543292248797	0.58162336520546	0.1475905588172171	0.5042828649867418	0.4922239880592812	0.0017093438816868	0.0864927998836338	49.9999996901016	4.080896120162034e-06	0.1783290527933597	0.9881422924174964	0.1917595825979358	0.1539389317157759	1.9731654469553075	0.1808924119632134	0.0707948923132329	0.20277047764826	0.1540274193567516	0.3173880822198985	0.2525883590566037	0.4850179963881605	0.5358103525513939
44	A-3	2	2D	0.43	0.9824561403508772	20.0	1200.0	8.062999999999999	12.67036	12.9021374621352	21.908134066805	0.788698843100361	0.746698142440588	0.2023167954792851	0.2431853934803403	1.5064070553862727	0.0657398151580868	0.6020029919129464	0.1516060773640035	0.5118911999365162	0.5008331892376403	0.0014692695752062	0.0743450405054363	49.99999999999864	0.0552216297071894	0.1564920139693064	0.9881422924901184	0.1910302612985935	0.1575419906046435	1.9728976350426413	0.1858779312260403	0.0714676535610805	0.2246965142260601	0.156213423354366	0.3316167860941773	0.2724596386064849	0.4750724245904202	0.5165603162775503
45	A-2	2	2D	0.81	0.4210526315789473	20.0	1200.0	0.8390000000000001	0.0	0.452415074199765	1.69927676041567	0.953705670485815	0.279163467523878	0.0853039885724906	0.0511823931435993	1.5850805285209577	0.0696914759809017	1.2300015244260452e-12	0.1	0.058253840523377	2.0500025407058728e-12	0.0116774199768423	0.3522275717075925	29.56313298708966	9.549177434397617e-19	0.4008919382222445	0.9801081671371202	0.4116812216088038	0.4751998003377664	1.9894484084826407	0.1850007490656828	0.0609769381059178	0.5542906875391089	0.17101572231542	0.5408542212543785	0.4802002593651947	0.8786097651889582	0.2793832682117642
45	A-3	2	2D	0.81	0.4210526315789473	20.0	1200.0	0.8390000000000001	0.0	0.4763118912714	1.76548888192168	0.946128725044547	0.285151860058349	0.121719438477086	0.0730316630873111	1.581680860233686	0.0786797726359314	8.704838395860172e-12	0.1000015836558543	0.0970405118973474	1.4508063992889803e-11	0.0087214718720831	0.2218366564234768	24.83569017674209	3.877731457610966e-09	0.2947645142791552	0.9764110981132867	0.404525317014297	0.4577211058682371	1.9861096879759808	0.1965855890544639	0.0629663032600373	0.5315017543192726	0.1713494872120484	0.6081949738234973	0.4697312684583787	0.7525894253790251	1120653.35230538
45	B-1	2	2D	0.81	0.4210526315789473	20.0	1200.0	0.8390000000000001	0.0	0.569689570233554	2.06065226298305	0.942233919938519	0.293409940712628	0.1262327194337421	0.0757396319489407	1.5804460959023197	0.0781450509759077	2.2870097080634355e-09	0.1	0.1001238568677083	3.811682832243466e-09	0.0089016857306552	0.2361339732566153	25.92688270530904	3.1317807232615873e-14	0.3121568395775558	0.9773814357809968	0.3996564527853631	0.4445857873747162	1.9852381268321693	0.1942161968355604	0.0626098157543633	0.5124198903238592	0.1708143095834253	0.5877193035547359	0.4606353183550846	0.7564593925802723	163843.04620404952
45	A-1	2	2D	0.81	0.4210526315789473	20.0	1200.0	0.8390000000000001	0.0	0.0	0.0074765671052521	8.88547791440409e-06	0.0	0.0177518324678291	0.0168468906141716	1.4619598229081738	0.0851950932661504	0.3490226231406024	0.1000000000004934	0.7420134995938396	0.3677706038087703	0.0009909252646051	0.0005947919623326	0.000238972178869	49.99999998025599	0.0261973366841659	0.0003981283954314	0.0087710144737084	0.005262608684225	2.0999987988935693	0.9371922950328055	0.0899999999999999	4.441129629056973e-17	0.2499999984174664	0.2317891637219945	7.401882715094954e-17	0.0227042912607294	0.0644286865470712
45	B-2	2	2D	0.81	0.4210526315789473	20.0	1200.0	0.8390000000000001	0.0	0.57031083150994	2.0720537481525	0.938692269565598	0.293215795479581	0.1286285069964505	0.0771771041978765	1.5803140842670598	0.0783898603962116	4.8682977109926765e-14	0.1007753649566795	0.1021828180194648	8.113829518320468e-14	0.0089032645235614	0.2370636950183453	26.026603577932967	5.160811123444023e-25	0.3138733521922943	0.9774661459076494	0.3981160770475574	0.4410437554060146	1.9850910193278983	0.1948790963120225	0.0626085717702798	0.507827040487313	0.1710836759041469	0.5839438297882409	0.4583992102809922	0.7552845546222365	0.263912785560262
45	B-3	2	2D	0.81	0.4210526315789473	20.0	1200.0	0.8390000000000001	0.0	0.5375912007661	1.96190156080582	0.936119731625389	0.292714030335353	0.1364308480876112	0.0818585088525861	1.58149756669344	0.0817959939593646	1.423491721922667e-13	0.1000000000000004	0.1131229980724983	2.3724862032038824e-13	0.0084829292832972	0.2127631931898185	24.48133524214867	8.85654169881912e-17	0.2940245385663415	0.9760778286240632	0.3910027094122143	0.4290022316171739	1.9854190088938417	0.1998815540626772	0.0628434690545947	0.4971848053484936	0.1703277998768726	0.5928524633611603	0.4531459084420834	0.7236239336595786	0.2608910915399272
46	A-3	2	2D	0.72	0.6785714285714286	20.0	1200.0	3.095	2.01254	1.96620493724811	6.43685602837459	0.873581986568478	0.349664318200711	0.1386164988494751	0.1371439566872264	1.5357501071790856	0.0681242579010994	0.3893768622460465	0.1	0.1953020577056993	0.393557679691536	0.0075973242503536	0.1915068199914692	24.60714052484392	1.2546695563771377e-30	0.2727183677098364	0.9761972208069912	0.361990578018897	0.3735638251453601	1.9827092688412769	0.2083113661712485	0.0640881623821831	0.4319711280602973	0.1798229194498122	0.5319795745844643	0.4185883851927469	0.7022146018240558	0.1015598636305983
46	A-2	2	2D	0.72	0.6785714285714286	20.0	1200.0	3.095	2.01254	2.00108036144013	6.52584078560839	0.873281570395325	0.351134709177481	0.1347292822158889	0.1375147804612985	1.5325096334432802	0.068109220120522	0.4206747798221489	0.1	0.2014560850125416	0.4121535949927664	0.0072772882159185	0.1742195813095928	23.3401788331674	2.10645289597929e-20	0.2552277992621485	0.974937530576474	0.3586195344711639	0.3708698914227394	1.982828458434376	0.2141004802074634	0.0648384379688278	0.4341597592268376	0.1823714198332404	0.5433161157253099	0.4198188484450659	0.6826042531936308	0.0822089555157373
46	B-3	2	2D	0.72	0.6785714285714286	20.0	1200.0	3.095	2.01254	0.0	1.30551478753109	0.0022247577171234	0.0	0.1305062153465943	0.1377452527690939	1.5297065975222657	0.0692388127973538	0.4554689093027057	0.1023685282621012	0.2256052567609028	0.4315322841708437	0.0073201582663451	0.1308010120283113	17.26860437562905	1.2221087622871624e-19	0.2142316726711483	0.9664215521600366	0.3054656913488553	0.3420124373656246	1.9746675071731803	0.1963839282386402	0.0690105243237891	0.5196427194667543	0.1854587865025589	0.560163070567949	0.4641147666411313	0.6105587021630298	0.058228335185891
46	B-1	2	2D	0.72	0.6785714285714286	20.0	1200.0	3.095	2.01254	1.95780116876027	6.60637390876468	0.874167977231112	0.33900846284538	0.1288520049784616	0.1353083604389506	1.5292456796675182	0.068496196783286	0.4501067520180864	0.1	0.2057900111479884	0.4286295190018301	0.0068688558435673	0.1573321896692121	22.305152364866142	6.434343338818426e-31	0.2392859758327562	0.9738050203533974	0.3529491231224643	0.3648663895345353	1.9832006992290725	0.2217495954841996	0.0656444064912121	0.4337648279350903	0.1856606788319216	0.5549240130192554	0.4195972006529963	0.657506939642698	0.0713601484749251
46	A-1	2	2D	0.72	0.6785714285714286	20.0	1200.0	3.095	2.01254	2.17550308900128	7.02761399521897	0.874773546288607	0.353880118492704	0.1301269408130783	0.1361912698537275	1.5300296879969864	0.0684525413438898	0.4466031784252919	0.1	0.2052149643729332	0.4267168184003095	0.0068971519253282	0.158114364829132	22.324587792316493	2.911655848692371e-35	0.2382489992207911	0.9738272284136292	0.3562222510001449	0.3693461134724543	1.983140086766664	0.2208296386258236	0.0656646106042233	0.4368417818804475	0.1854668261284816	0.5565360364062758	0.4213196164685591	0.6636517481553138	0.0732377777026804
46	B-2	2	2D	0.72	0.6785714285714286	20.0	1200.0	3.095	2.01254	1.96210753385652	6.41968541117998	0.872403629183704	0.350341508189551	0.140101412660987	0.1401458562569028	1.5333632334022171	0.0680788127404908	0.4003172244667029	0.1	0.2019608955262941	0.4001902743203521	0.0075328299844465	0.1874064417044404	24.278623583883988	1.1816706948412348e-20	0.2700670130741794	0.975882910162736	0.3572879354814009	0.3663734042974714	1.982513101345057	0.2100073766195696	0.0643426343591603	0.4254289829401294	0.18072730577639	0.5279720913995264	0.4148790311351756	0.6939257022588147	0.0885309309101697
47	B-2	2	2D	0.22	0.5384615384615384	20.0	1200.0	2.818	5.83044	6.17970452825216	11.5496241143798	0.782960450756544	0.683376491849535	0.1268108153018705	0.1516326960373154	1.4941908977513036	0.0662898555864434	0.5957394617829473	0.1728203443311181	0.5821715893116186	0.4982184504429168	0.0010882895030678	0.0088786058985972	7.558312538684532	20.2184022388187	0.034088110558859	0.9264553794482668	0.1053944183190645	0.0999491856955974	1.9679049272104787	0.2121491098402112	0.076291068202921	0.348334715345337	0.1475942819356285	0.3837403001295224	0.3673119940763643	0.2604604876315101	0.1120729542350834
47	B-1	2	2D	0.22	0.5384615384615384	20.0	1200.0	2.818	5.83044	4.99650451480558	11.1388701979965	0.769575338920763	0.58287308121877	0.1258982793030074	0.1511714174049027	1.4942828671115571	0.0663271322336098	0.6007425219932419	0.1723001424065442	0.5808275712609319	0.500309192845111	0.0011980269656693	0.0114652798429304	8.970135039927744	20.183410018672102	0.0440516518222462	0.9373049599094758	0.1030522926453878	0.0976323135305656	1.9677986356299952	0.2087280518570951	0.0763318605277481	0.3474055455178193	0.1470760511989863	0.3751207769168218	0.3666914840866161	0.2602690107783989	0.0860053710515749
47	B-3	2	2D	0.22	0.5384615384615384	20.0	1200.0	2.818	5.83044	5.94443189711841	11.4359090236743	0.778806173532083	0.6674370002319	0.1261759888131076	0.1514522426740678	1.4942071628429316	0.0663708297667233	0.6003253875695752	0.1721086837397817	0.5809815295093639	0.5001355414010838	0.0012142010686979	0.011573895873114	8.932108125654816	20.131875416787143	0.0443982842909415	0.9370548474596974	0.1032592248305773	0.0976572652814536	1.967773476877935	0.2091881264098761	0.0762778895420115	0.3457485802521259	0.1466795798526399	0.3746201861996946	0.3655819183571528	0.2606834038286355	0.0883263183712128
47	A-2	2	2D	0.22	0.5384615384615384	20.0	1200.0	2.818	5.83044	6.01553531945769	11.3316044086514	0.782222371043901	0.678660611385933	0.1268354708764282	0.1518612756793445	1.4945616912023736	0.0663429869572757	0.5973091961577385	0.1728293663729322	0.5815096300247917	0.4988763120458372	0.0011382108118639	0.0105622559660397	8.67970096219954	20.11756472268321	0.0404451597786381	0.9353427440771988	0.1043392377700128	0.0987265299157117	1.9679524845641008	0.2104709823886372	0.0762222093539425	0.3462071223227382	0.1472180473106055	0.3780452101965702	0.3658893641308397	0.2611500615610959	0.0955529777718983
47	A-1	2	2D	0.22	0.5384615384615384	20.0	1200.0	2.818	5.83044	5.8583083398184	11.2061424887919	0.782595261075861	0.668003706252018	0.1267660299774562	0.1523603722108452	1.4944501638020569	0.0663752377922643	0.6019022149541211	0.1720708845897999	0.5809286804061649	0.5007913351562439	0.0012387057538026	0.0129355513717715	9.842795903758145	20.18553232313524	0.0493214388996779	0.9425441227110384	0.1026486526249596	0.0969744330889116	1.967846110692269	0.208206206687765	0.0761974742481109	0.3447219287253637	0.1468245828812266	0.3697498806941572	0.3648924813150775	0.2622703566715284	0.075254189804782
47	A-3	2	2D	0.22	0.5384615384615384	20.0	1200.0	2.818	5.83044	5.98816799834599	11.1284338036347	0.780133695381577	0.689748703686161	0.1262043831642349	0.1518916159679283	1.4942335592303702	0.0663403289234519	0.6035367723343298	0.1717894967026416	0.5800076823956625	0.5014693245838555	0.0012722418747798	0.0132095350716754	9.78288027892576	20.24067948425971	0.050441439928221	0.9422125668522032	0.1022379556109653	0.0967774767409034	1.9677674410849093	0.2071082052805101	0.0762233820411871	0.3465904923721275	0.1466300856306496	0.3695508776761164	0.3661461795412524	0.2618786277805072	0.0714511048217574
48	A-3	2	2D	0.37	0.3333333333333333	20.0	1200.0	7.707999999999998	7.9194	7.40667044705198	13.6799647414791	0.828250000941194	0.653697160439071	0.079601962097706	0.0895175288324211	1.514301277364794	0.0668961428038062	0.5245643508453267	0.1390653210602466	0.3308871083547261	0.4664600566886329	0.0046834334150748	0.0834455390557026	17.217172074468053	5.247210853969583	0.3084429774076018	0.9663246222524956	0.1250699145547619	0.0975749088784242	1.96445020942442	0.1784307467322423	0.0699257720693352	0.1801629130857126	0.1395032392646147	0.3606699142376722	0.2309298610121436	0.270537976766548	0.0581328898699625
48	A-2	2	2D	0.37	0.3333333333333333	20.0	1200.0	7.707999999999998	7.9194	8.12108857039548	14.0982871091341	0.83716286187988	0.688078427908381	0.0805920372180256	0.0899889160152834	1.5148297967344804	0.0666917130815588	0.5165981047462099	0.137689334976287	0.3281141557258569	0.4626535747735545	0.0048267266693169	0.0836876877884615	16.7383938063982	4.508323455115538	0.3051388575310388	0.9653947184093494	0.128979033013744	0.1005843948301272	1.9653217638245	0.1808221763621813	0.0700063082090875	0.1798507437980948	0.1390901335558285	0.3667469867431041	0.2306220071319937	0.2742609986338723	0.0627842093054025
48	B-1	2	2D	0.37	0.3333333333333333	20.0	1200.0	7.707999999999998	7.9194	8.19723851947256	14.1784674885581	0.835976130628743	0.691583149570512	0.0795478536791813	0.0871804959900176	1.5145832708387543	0.0667415591503241	0.4959503237085312	0.1367014202590603	0.3268139175542348	0.4525299303989526	0.0045487699446244	0.0819330936563871	17.412142766906026	4.36333670078338	0.3071429568174047	0.9666891381128518	0.1255496101247636	0.0976452333634814	1.9648267036422964	0.1777380558801766	0.0698898118208727	0.1777422268890157	0.1390142238611961	0.3660431256283606	0.2285361662822245	0.2667588230098862	0.062088832607027
48	A-1	2	2D	0.37	0.3333333333333333	20.0	1200.0	7.707999999999998	7.9194	7.60458459097571	13.9806475738725	0.832418642039877	0.653441043230211	0.0793248279255916	0.0872486606076631	1.5145779106977562	0.0666122106193538	0.4998909533028454	0.1367928036367727	0.326900074144891	0.4544913764421197	0.0046296407328305	0.0807559151837216	16.84323584572153	3.965302122953065	0.3025732942756311	0.9656027124034346	0.1266623560310176	0.0988924594445025	1.9647089298556883	0.1800480274467409	0.0701461664961897	0.1807565131686432	0.138871267046569	0.3705266315794779	0.2315145760809041	0.2668970352358873	0.0644895953402276
48	B-2	2	2D	0.37	0.3333333333333333	20.0	1200.0	7.707999999999998	7.9194	8.28697788597839	14.3885030534708	0.83801040690886	0.687275962379647	0.0809235613891554	0.089334745137855	1.5150601003124826	0.0669294619699404	0.503939861324822	0.1369192766725572	0.3283980646268227	0.4564921323884901	0.0047039875408789	0.0849852047573012	17.466630495671364	5.067213088711589	0.3124089817589428	0.9667896014066508	0.1262781214418889	0.0977119368925176	1.96518633904202	0.1774130551457811	0.0696637121761151	0.1737835800596936	0.1382957435304745	0.3591929536142344	0.224589387185351	0.2720318867876739	0.060912872183433
48	B-3	2	2D	0.37	0.3333333333333333	20.0	1200.0	7.707999999999998	7.9194	7.89984155657522	13.8491637758902	0.831605756342535	0.685926123008462	0.0784169187674837	0.0842271593436034	1.5139018489499734	0.0666890154852888	0.4740942218521464	0.1354860551236833	0.3278604900032973	0.4413897889094198	0.0043880868510609	0.0782219286409073	17.225975486787483	3.8241406320700166	0.3044846822933783	0.9663412529404232	0.1209534596281143	0.0944503003582455	1.9642770188051968	0.1780345336750083	0.0700655198755797	0.180881346004026	0.1393853916621117	0.3676548277033245	0.2316374272860316	0.2568993883427563	0.0588798577325149
49	A-1	2	2D	0.95	0.8	20.0	1200.0	0.0	0.0	0.166124176954415	0.603434119106344	1.01570060690588	0.27104242115507	0.0463490883994595	0.0278094530404778	1.5885405247999926	0.066567103297867	1.7304575016964982e-11	0.1000000023606398	0.0306806850028779	2.8840958360776496e-11	0.0115294553450572	0.3104545819441199	26.327081345365983	8.368559976800884e-18	0.342507967433366	0.977717599902328	0.4322656961002075	0.5681516150528515	1.997009160777975	0.1732301388877702	0.0623211373820894	0.7143573968014871	0.1695903362057149	0.6268113475637561	0.5435031586841517	0.9064156500374492	0.3509636673819961
49	A-2	2	2D	0.95	0.8	20.0	1200.0	0.0	0.0	0.177420912840666	0.664798163373288	0.998795872794509	0.267201110851402	0.0589231511272801	0.0353538915408652	1.5944844230194302	0.0668600566917895	1.4671605125352661e-08	0.100000000010589	0.0381341312780491	2.44526746109878e-08	0.0120499636963861	0.3461654340716267	28.12750846340253	1.4214391053844304e-10	0.3733879788467324	0.97911409544046	0.425596307666471	0.5455738152561914	1.996648502842244	0.1708281302612107	0.0613044898350084	0.6819044841990117	0.1677841203351318	0.5884778898752184	0.5319464067754585	0.9270931408686834	103664.96541421708
49	A-3	2	2D	0.95	0.8	20.0	1200.0	0.0	0.0	0.105784859454476	0.385682734840997	0.939494000751847	0.291943831974578	0.0140763360976645	0.0160680343717519	1.4531109804352176	0.0851950932667672	0.5414926625983187	0.1063494304133327	0.3242655769942741	0.4743724426276626	0.0015434479317143	0.0009284652797016	0.0015527058761077	22.35411974202928	0.0187371599211217	0.0025811634806735	0.0286641787612373	0.0325555820733225	1.970857296232931	0.1949254887517663	0.0840575604724083	0.5357584092849554	0.1624406729485529	0.6569972630846043	0.4717186374365085	0.049552081724776	0.0166208312618469
49	B-1	2	2D	0.95	0.8	20.0	1200.0	0.0	0.0	0.190369555368841	0.709296267968185	0.996727328828282	0.269273400374811	0.0534501112569614	0.0320700667541779	1.5915245417641202	0.0665990298768037	2.0165599100743843e-14	0.1000471641351829	0.0350453418736765	3.3609331834571945e-14	0.0117886584607481	0.3294269847199426	27.344399764978608	4.651807535664865e-17	0.3599893131005344	0.9785287927081564	0.4270215721464957	0.5536050716490272	1.99670937280721	0.1720431349104201	0.0617869328055283	0.696433500692338	0.1686387065843607	0.6049653450257889	0.5371918423277551	0.9151021231231478	0.3610302308812543
49	B-2	2	2D	0.95	0.8	20.0	1200.0	0.0	0.0	0.216394846086802	0.832008660403135	0.978068706270446	0.265919204128825	0.0735222393477899	0.0441133436086743	1.5983337848005548	0.0674119900032373	4.6962455893594116e-15	0.1000008321062415	0.0455083283058739	7.827075982265627e-15	0.013079715500036	0.3907063108153616	29.271162779823843	2.0571830403130693e-08	0.4030615140282861	0.9799137380616042	0.4242711078387621	0.5345269520295449	1.9971647719319503	0.1667110704126433	0.0597843213295998	0.6598712053536389	0.1645725185931668	0.5514301576658399	0.5237608436081501	0.9693466064535808	0.4248244993224845
49	B-3	2	2D	0.95	0.8	20.0	1200.0	0.0	0.0	0.0	0.0386906683154731	4.98510014365705e-05	0.0	0.0204526694744281	0.0293471554114735	1.5008044276079195	0.0779814892479418	0.8348814196682789	0.1830965034121398	0.5815060499157801	0.5818469792864764	0.0025999564750932	0.0211203425891472	7.523344675756513	24.88605809131505	0.4184939500842199	0.9261387982476412	2.16731091196372e-18	2.076199691668213e-18	1.9643001055072409	0.2133166818049233	0.0712719082915523	0.3579611675498123	0.1427397819585702	4.1139342624884456e-17	0.3736698100877862	0.0504674980006208	287812.27328329807
50	A-2	2	4D	0.48	0.9423076923076924	20.37037037037037	3500.0	11.333	12.92463	12.6284981972689	21.823555851677	0.799577912056688	0.723711383324824	0.2048310202493152	0.2557235781009142	1.5066960565616934	0.0670794266512964	0.6484611841978514	0.1523146310248208	0.4876381407488014	0.5194083663998685	0.0029668185706017	0.1393281727857253	46.36214799460022	12.64253995732054	0.2656842659394806	0.9872237530517346	0.1887275581038326	0.1293608344542719	1.9732181983406631	0.2290973611631304	0.069642015353788	0.0854369110371322	0.1	0.246677593311718	0.1246459151256647	0.5244125853409115	0.0950499053424402
50	B-3	2	4D	0.48	0.9423076923076924	20.37037037037037	3500.0	11.333	12.92463	13.1899689389438	22.0099562320673	0.80112892243062	0.748035455193272	0.16392881798768	0.2625339100875005	1.5068211586991471	0.0600793967968585	1.001511639687606	0.1562420544463947	0.4383577556349099	0.6253539561429369	1.9656977424119562e-13	1.0709375915243642e-12	4.848129528857777	28.914228668679872	1.788164427556087e-12	0.8898704597932362	0.4176135852012189	0.3363693982542928	1.9753183199268307	0.3532038959048879	0.0825394722053515	0.2054560727286204	0.1411362575343664	0.5616422443633018	0.2550804192618509	0.5989033083428643	5650.4150530931165
50	B-1	2	4D	0.48	0.9423076923076924	20.37037037037037	3500.0	11.333	12.92463	12.4878442640001	21.4877143620745	0.800305948775379	0.726174854999219	0.2025489796044995	0.2581836512322674	1.5073589200997624	0.0673256409440792	0.6746726828068995	0.1544762609169855	0.485953280359037	0.5292909245699321	0.0032414939594784	0.1437932384603328	43.76017473975787	13.565826186019102	0.2706476401187205	0.9864743544514885	0.1880254730689938	0.129316264747089	1.9732760026922345	0.227855906249434	0.0697369023201493	0.0877592840818854	0.1	0.2433990795222425	0.1276017439721493	0.5312931544396892	0.0861580422061382
50	A-3	2	4D	0.48	0.9423076923076924	20.37037037037037	3500.0	11.333	12.92463	13.1330913497975	21.8860107818928	0.801015395494889	0.74913397355833	0.2047897879094056	0.2599694412425227	1.50729942157535	0.0672336795283358	0.6694453365884014	0.1531751645382294	0.4842541088510485	0.527352629761528	0.0033523669843888	0.1478880218436696	43.51450850469141	13.63013464177594	0.2754761555256852	0.9863990324195452	0.1880094284331378	0.1289876281394281	1.973214585285344	0.2250940366286931	0.0693103202167024	0.0860699977357799	0.1	0.2402697356232664	0.1254536680219725	0.5368450912256205	0.0849401702897168
50	A-1	2	4D	0.48	0.9423076923076924	20.37037037037037	3500.0	11.333	12.92463	13.1199251332532	21.870344129447	0.801932035277128	0.748063004566833	0.2048319950733465	0.2565683419786952	1.5072114661866205	0.0671713669355557	0.6525794219151302	0.1520852679968829	0.4833567998041463	0.5209884582946201	0.0031442057921202	0.1442089071999695	45.26497091296473	12.828385027366602	0.271679488396189	0.9869181209961172	0.189766672804003	0.1300280318945619	1.9733767279375352	0.2269358920807357	0.0694301729258906	0.0851995135566244	0.1	0.2449637117996648	0.1243426357884938	0.5308052810732267	0.089295396319471
50	B-2	2	4D	0.48	0.9423076923076924	20.37037037037037	3500.0	11.333	12.92463	12.988430690314	22.0251478235079	0.800833546400212	0.736369161152019	0.1656762168864308	0.2646361690581043	1.5065320733523495	0.0602543253772963	0.9973093424719456	0.1567993985937632	0.4417246705646161	0.624368314861629	6.447523814972111e-17	1.7419074609533274e-16	2.101668905678733	0.0029224468378984	2.9075522899317445e-16	0.7779150514192028	0.4149584487415706	0.3344613835414463	1.9753202599482425	0.3532953605390784	0.0825406874802488	0.206011745406691	0.1412658212041228	0.5582753294353836	0.2555939743815312	0.5990975525995508	0.0097135301708257
51	A-1	2	4D	0.49	0.9215686274509804	21.5686274509804	3267.0	13.461	13.697820000000002	13.8395385355878	23.2554467257404	0.797892147622027	0.745852125573327	0.2289835755418036	0.2648303493405311	1.5086400489693357	0.0659006854251576	0.5565473580972324	0.1385670467708123	0.4718277053527791	0.48121449951939	0.0036604634524011	0.1691484080110772	45.609560677384216	6.86355220956149	0.3013586071788178	0.987015674003288	0.191031728294072	0.1273073781086251	1.9736279580740712	0.2012825487062011	0.0670647584324079	0.0664200719194124	0.1	0.2268136874684031	0.0996669739074791	0.5612861354602334	0.1111852882257724
51	A-2	2	4D	0.49	0.9215686274509804	21.5686274509804	3267.0	13.461	13.697820000000002	13.7920730670269	23.4663516406847	0.798867035048467	0.735714769327787	0.2476736230444677	0.2718716580726041	1.5096742102369365	0.0653259253465068	0.4977013003269707	0.1295406855671076	0.4661696833667906	0.4534032165022681	0.0041555330837275	0.198456881819034	47.15726190128523	4.479421999437092	0.340287701981916	0.9874364656575118	0.1761415189593905	0.1128746751031272	1.9728940991296304	0.1603348549863957	0.0645228469171214	0.0408181090407795	0.1	0.1935426146512933	0.0636968719593129	0.5832032149947655	0.1212781314577508
51	A-3	2	4D	0.49	0.9215686274509804	21.5686274509804	3267.0	13.461	13.697820000000002	13.0556230131909	23.3358708958252	0.796660708447425	0.702263650287589	0.230511616883131	0.2628114454437643	1.5090049632364453	0.0658197246044439	0.5401223460985449	0.1370903461793007	0.4711022313314573	0.4737406892749914	0.003500769819603	0.1672910541025393	47.186933366989095	5.053464468804822	0.2998773083737772	0.9874442665028914	0.1921623866878003	0.1277624986749759	1.9739698372908543	0.2030909285661763	0.0668112903739679	0.0648673597218966	0.1	0.2290204602947654	0.0975643619338293	0.5578649982212796	0.114525519127648
51	B-1	2	4D	0.49	0.9215686274509804	21.5686274509804	3267.0	13.461	13.697820000000002	13.724165909634	23.0587844977646	0.797499365580159	0.746309900170072	0.2268844182732695	0.2655343787962455	1.5084752765295548	0.0660124267461986	0.5703508809336756	0.1402699659437057	0.4720632420671425	0.4873332350368844	0.0037026297060137	0.1678301959549123	44.727296889106455	7.542661329580537	0.2983661354073973	0.9867629432774712	0.1927233140156526	0.1291328940911166	1.9737473346372283	0.2034079175355282	0.0674298953619643	0.0700429304605495	0.1	0.2295706225254602	0.1045349891422718	0.5624974688422745	0.1073633712887919
51	B-2	2	4D	0.49	0.9215686274509804	21.5686274509804	3267.0	13.461	13.697820000000002	13.7812549655351	23.417832816282	0.799220438822217	0.736335068704948	0.2329205488636601	0.2633217500308057	1.5091195072923675	0.0656671808636174	0.53052176510601	0.1355109265020514	0.4687851190822336	0.4692716066870791	0.003614002121571	0.1719449136608036	46.97742466018777	4.433285038108999	0.3061092249942677	0.9873889769300171	0.1909530019488098	0.1264443192558126	1.9739512548413576	0.1960181398610993	0.06656917652304	0.0621750795502525	0.1	0.2251056559234987	0.093895227214654	0.5617109829474219	0.1157272565678067
51	B-3	2	4D	0.49	0.9215686274509804	21.5686274509804	3267.0	13.461	13.697820000000002	13.9942834045466	23.2752517995084	0.800120263117744	0.751451589873737	0.1785809222940078	0.2828823291285266	1.5082535321190793	0.0583408254242439	0.9840568269817842	0.1478767819645894	0.4179749205913895	0.6212257099745452	1.375357143484637e-13	8.520802423297064e-14	0.0195338035405523	0.6221529076711738	1.2589975935309714e-13	0.0315298429705034	0.4608847621645648	0.3939102610303351	1.9752172678576307	0.3379017737852779	0.0819238969534248	0.2546827610015113	0.1620063551227489	0.5820250794084847	0.2979851386063711	0.6767925901589469	0.0151867881102056
52	A-2	2	4D	0.42	0.8103448275862069	20.560747663551407	2962.0	10.201	12.09277	12.8573363890089	21.5888410614712	0.805752591423073	0.739128530762391	0.198846067234374	0.2628891283381177	1.5018517178484283	0.0668874420223434	0.7220735616976417	0.1610231988356965	0.5088317135239928	0.546167461945495	0.0038278629692049	0.121694116424354	31.191659576996702	13.858495836284694	0.2355435014655718	0.9811271255422558	0.1870351916015333	0.1320691598556256	1.9721276668329124	0.2610332435496052	0.071248675257278	0.106119306878839	0.1	0.2556247850104353	0.1502852362837995	0.5166524046180974	0.0157822864780292
52	B-1	2	4D	0.42	0.8103448275862069	20.560747663551407	2962.0	10.201	12.09277	12.5679967679166	21.025737347651	0.803918703351308	0.743537184651799	0.192547219681664	0.2557366123754017	1.5010057727523392	0.0671688641372942	0.7281760847973185	0.1631244730405762	0.512435446958863	0.5482526700580062	0.0035446338976581	0.1155971149447114	32.01186296872115	14.783950876161931	0.2316291700028241	0.9816017870375736	0.1803581430963592	0.127727401048572	1.9715554064379688	0.2633009560685389	0.0713773691125808	0.108187603042307	0.1	0.2559353830383128	0.1527668693684319	0.4990611283686853	0.0151474088534058
52	B-2	2	4D	0.42	0.8103448275862069	20.560747663551407	2962.0	10.201	12.09277	12.7724498904865	21.4848548137069	0.805380714656256	0.738143089653595	0.1975200459352289	0.2616259350731019	1.501786499551345	0.0669630095201906	0.7245538387475602	0.1617454255939369	0.509320794160264	0.5470172805000258	0.0037466173635335	0.1199629183914119	31.41899386871747	13.857539687629574	0.2335380429613172	0.9812611226180282	0.1868797576839344	0.1320872777141753	1.9722242251805049	0.2624438483875507	0.071374382363792	0.1068035583477784	0.1	0.2571411628784188	0.1511078390683856	0.5136761311786893	0.0162953328950797
52	B-3	2	4D	0.42	0.8103448275862069	20.560747663551407	2962.0	10.201	12.09277	9.6824443709195	21.1319145172164	0.79366741433765	0.577308052807352	0.1950802460992561	0.2592942247508457	1.5014670538687953	0.0670119078334877	0.7291669963288736	0.1627396371706936	0.5110104620672419	0.5485894536524115	0.0036194665144427	0.1165064640609378	31.58884981972993	14.159157266423712	0.2296079756146059	0.9813600049905408	0.1858164862044608	0.1316140198849754	1.9721742123624688	0.2658189509344832	0.0715014376608904	0.1083010908954313	0.1	0.2593815623181523	0.1529026176685928	0.507414708696759	0.0157954081385482
52	A-1	2	4D	0.42	0.8103448275862069	20.560747663551407	2962.0	10.201	12.09277	11.7966608563009	21.3429338409365	0.801454751062951	0.689645597423206	0.1958851900381918	0.2597734992543756	1.5015299168436778	0.0670902991525481	0.7261518096581345	0.1622603436823482	0.5104138980266746	0.5475631103239436	0.0036840491021004	0.1182317490910953	31.49288090750064	14.279375010193537	0.2323067137229596	0.9813042649013236	0.1850961848291161	0.1309415108605248	1.971978676643874	0.2636389287842795	0.0714092142525278	0.1074241480526044	0.1	0.2572793882503659	0.1518525319616546	0.5089467592059959	0.015814491347572
52	A-3	2	4D	0.42	0.8103448275862069	20.560747663551407	2962.0	10.201	12.09277	12.8797465078848	21.3388417282126	0.806332586664878	0.748552494305421	0.1970957621808854	0.260660689022155	1.5017238823094132	0.0670735174195286	0.7225078314110709	0.1615262356395104	0.5092169599558296	0.5463164861868376	0.0037482216736858	0.1202400076288153	31.47921465076466	14.121066029578392	0.2348963757423619	0.9812963002201897	0.1853601248319666	0.1309846283090725	1.971970958716768	0.2614950437014228	0.0713250051021207	0.1066494394509781	0.1	0.2558866643018083	0.1509226973049579	0.511885324960043	0.0153794837917871
53	A-3	2	4D	0.48	0.903846153846154	21.359223300970875	3256.0	6.5360000000000005	7.35298	7.57754629162136	13.5677392415064	0.790933837433099	0.706123969799477	0.200448733803657	0.3021322942760604	1.488587870498982	0.0655385073722569	0.9072796347618942	0.2022906120880909	0.6645855008809851	0.6019318604442085	0.0013710629286032	0.0223868122726038	15.728070583462925	15.442943566104836	0.0492431664180954	0.9632534660520344	0.1712892489840357	0.1300985368930734	1.978210683127141	0.4148458256107485	0.0803444402286019	0.1595254090068358	0.1	0.2861713327009194	0.2100330115557728	0.4546176434417377	0.0310298544881925
53	B-3	2	4D	0.48	0.903846153846154	21.359223300970875	3256.0	6.5360000000000005	7.35298	7.55297490819715	13.4624679361767	0.789992638152925	0.710183071373063	0.1993361882948771	0.3000465001761228	1.488546166675191	0.0654722871118564	0.9052284421746108	0.2018690954515936	0.6642544797697639	0.6013894082859761	0.001370435336465	0.0227418179026879	15.994593920314896	15.414281820926368	0.0503467109634721	0.9638436467393464	0.1696421773711871	0.1289158244060415	1.9780215531285965	0.4144427321014802	0.0802677457817083	0.1599279047448565	0.1	0.285398809266764	0.210451417491442	0.4517041424848522	0.0313803033226619
53	B-2	2	4D	0.48	0.903846153846154	21.359223300970875	3256.0	6.5360000000000005	7.35298	7.61400329231124	13.7232190429369	0.789984476836939	0.702325613747499	0.2010652269881942	0.3025056415426425	1.4886798442672031	0.0655183310347733	0.904514958026056	0.2015338336441532	0.663252421340381	0.6012003757096519	0.0013825218095572	0.0232088488902678	16.187329306363935	15.611844607527326	0.0508860765190828	0.9642587579566604	0.1717123304746228	0.130379798572929	1.9779764011010232	0.413101442709443	0.0801775678159712	0.1592919984986034	0.1	0.2858615021405361	0.2097901713880584	0.4560942890058394	0.0321421277428109
53	A-2	2	4D	0.48	0.903846153846154	21.359223300970875	3256.0	6.5360000000000005	7.35298	7.73094027329998	13.9240451041015	0.790751137790379	0.702145426165859	0.1990222390467257	0.2891103332100745	1.4893480171162483	0.0652411238623686	0.8526534049403306	0.2026285665117394	0.6779886026272199	0.5869627276820064	2.1505355536550242e-09	1.523398195528458e-09	0.1083808463149141	7.300364081640178	3.572499821653474e-09	0.1529979909517951	0.1834010505045037	0.1373132542321322	1.979423122034716	0.4267041219548236	0.0809330297838158	0.1487048403180235	0.1	0.3220113938002803	0.1986161065218424	0.4264235889656049	896.0263893890237
53	A-1	2	4D	0.48	0.903846153846154	21.359223300970875	3256.0	6.5360000000000005	7.35298	6.98567407926698	13.7912493924385	0.787163986267432	0.643486575594424	0.2006588816552509	0.3018457833243036	1.4891556509938797	0.0655702815753354	0.9042732264545372	0.2014516418479856	0.6635519853135418	0.601136289971632	0.0013834219575326	0.0232336490078564	16.19433298087397	15.943059440855729	0.0510748692774593	0.9642736629860024	0.1710171750075697	0.1298145172077171	1.978091357029664	0.4126374007914931	0.0803073131724499	0.1590729831782751	0.1	0.2853731454089989	0.2095621721540251	0.4548939495398771	0.0305491785759257
53	B-1	2	4D	0.48	0.903846153846154	21.359223300970875	3256.0	6.5360000000000005	7.35298	6.65675829579014	13.3266480251465	0.785470317762467	0.635934054946188	0.1993844849247434	0.2984187391963352	1.4887505086124015	0.0656468789979035	0.8966999027480582	0.2009106021658329	0.6633335119026771	0.5991180336830698	0.0014133900446089	0.0250416497243278	17.117437461685466	16.341763502471526	0.0556632787210673	0.966135057550082	0.1663167193381726	0.1264169862482226	1.977682948146292	0.4103582177446481	0.0800743921788491	0.1600978828302786	0.1	0.2810032093762556	0.2106279815359342	0.4498773751688857	0.0299540036314128
54	B-1	2	4D	0.48	0.903846153846154	21.359223300970875	3257.0	6.854	2.9203900000000003	3.50258036578877	7.41338605630588	0.777530746968096	0.607650584599578	0.195106831276621	0.2997911210374114	1.4829835013970636	0.0649809369049627	0.9365485620150829	0.2193548194625946	0.7322388282923283	0.6095144567294775	0.0012014098033806	0.0007208458820284	1.6806658860158015e-16	7.748265106924189	0.001760663698809	2.8011098100263353e-16	0.1408059567383233	0.1089051651064068	1.9829465116116065	0.5055582487298771	0.0853785414918256	0.1734414624858407	0.1	0.2660005080088626	0.2242463985941481	0.4094171320258467	0.0429093992664192
54	A-1	2	4D	0.48	0.903846153846154	21.359223300970875	3257.0	6.854	2.9203900000000003	1.56663809851709	7.26657539974904	0.696070299224032	0.309731799965763	0.194605834435073	0.2984894227816212	1.4830561832166531	0.0649568852105916	0.9338153845598454	0.2190508697985503	0.7321542404115604	0.6088186322552891	0.001198007502112	0.0007188045012672	1.3502149716111374e-20	8.089096291111082	0.0017631303606183	2.2503582860185623e-20	0.1402970262530474	0.1084783041969177	1.9828864282698035	0.5056339820197796	0.0855991660737207	0.1732045866835432	0.1	0.2660826292278213	0.2240087418861009	0.4076865314798061	0.0417537227339418
54	A-2	2	4D	0.48	0.903846153846154	21.359223300970875	3257.0	6.854	2.9203900000000003	2.34979089164692	7.49342091065126	0.749274270743946	0.418512340593031	0.1955795055657724	0.2993566104012518	1.4830647724309491	0.0649762753532264	0.930613391905624	0.2184644081176296	0.7307146024703364	0.6080002937560895	0.0011816517427683	0.000708991045661	1.9063215253642616e-18	8.21659755790562	0.0017306118925879	3.1772025422737693e-18	0.1419232885338551	0.1096109116393359	1.9825303192774617	0.5042003068293397	0.0856613920815625	0.1723250551172847	0.1	0.2675547856370757	0.2231250352108744	0.4096765130862488	0.0416483789296632
54	B-3	2	4D	0.48	0.903846153846154	21.359223300970875	3257.0	6.854	2.9203900000000003	3.42279632456796	7.59354517448719	0.770181428273828	0.585252710795068	0.1947298433654414	0.2987458786712039	1.4828910865979643	0.0649013433693018	0.9341555947875948	0.2190591464992746	0.7318280817083387	0.6089053795856537	0.0011959987214687	0.0007175992328812	2.505612009730745e-16	7.564712006553174	0.0017578795475631	4.1760200162179084e-16	0.1406824155585554	0.1087551818306276	1.9829324718717103	0.5058143680777539	0.0855478465403875	0.1730545526875824	0.1	0.2664140387440981	0.2238581379359907	0.4082186597347129	0.0427054215705689
54	A-3	2	4D	0.48	0.903846153846154	21.359223300970875	3257.0	6.854	2.9203900000000003	3.15567100465974	7.42369486738003	0.768671496823654	0.553007255315005	0.1949889491210127	0.29803224128385	1.4829482460218504	0.0649812680385324	0.9284570875803184	0.2186841638979741	0.7318475233522379	0.6074472715816623	0.0011835561708203	0.0007101337024926	3.9277373086742713e-13	7.675356122010598	0.0017438032515524	6.546228847786165e-13	0.1404287218833793	0.1084903227738533	1.9826710409355328	0.5064585840136163	0.0856976842255055	0.1725650516420026	0.1	0.2664086733962095	0.2233663706056008	0.4072326977601961	0.0421212908202842
54	B-2	2	4D	0.48	0.903846153846154	21.359223300970875	3257.0	6.854	2.9203900000000003	3.5248619116618	7.66097924192433	0.775260088408321	0.593485887012261	0.1946738313314116	0.2981456108969293	1.4827478342467677	0.0649504933026613	0.931513551964609	0.2180849361506564	0.7302774246231879	0.6082306949028781	0.0011819963608701	0.000709197816522	2.130342662026171e-16	8.105039304706514	0.0017371080977515	3.550571103376951e-16	0.1415810098326858	0.1094086824533033	1.9824157231416988	0.5059065544095881	0.0856932941468514	0.1727638232175184	0.1	0.2679854672790604	0.2235661375789956	0.4082634911667548	0.0421511909091041
55	B-1	2	4D	0.52	0.9791666666666666	22.0	3500.0	12.975	13.185620000000002	13.2986532833731	22.4416927428045	0.800498162137265	0.740272663598689	0.1455026483289284	0.2416951398198577	1.5109646071624778	0.0591541904938238	1.0611047468598167	0.1522109043794864	0.3996915319458551	0.6387946027279429	3.9309886992196843e-13	3.008587058886537e-13	0.1653512358058303	49.99962684747972	4.975303895043556e-13	0.2160462126016348	0.4447605789082269	0.3630090395333317	1.9771552432963428	0.3520200449763421	0.0819961487133112	0.2161897810827249	0.1452351869196941	0.6003084680536473	0.2648768535130839	0.6047041793534903	70866.82994903963
55	A-2	2	4D	0.52	0.9791666666666666	22.0	3500.0	12.975	13.185620000000002	13.1132357791037	22.537297585214	0.800230702431472	0.727097783713878	0.2021448968426076	0.2281268877514972	1.512832166715904	0.0678452795741404	0.5285315202842811	0.1355950421261191	0.4340285918224917	0.4683356297847508	0.003507249975411	0.1774668487557955	49.99999999999864	9.428571274946496	0.3376440507291649	0.9881422924901184	0.1815058114606739	0.1200096270720269	1.9755220867255825	0.1946660895716152	0.0662971209012467	0.0611888958609399	0.1	0.2283273574483433	0.0925437439194518	0.5256033635793197	0.0746261248398072
55	A-3	2	4D	0.52	0.9791666666666666	22.0	3500.0	12.975	13.185620000000002	12.9119753514801	21.9658525580449	0.798370883626019	0.736274796265464	0.1455781428729037	0.2413872516909188	1.5101863298784408	0.0597483862237398	1.0581283902052572	0.1554413702970306	0.4092193065436685	0.6381462355121205	5.548572822597385e-15	2.6341972067699866e-13	46.875220944056615	49.99999954471704	4.465705403672057e-13	0.9873618281691194	0.4301282623388449	0.3484853369941219	1.9771472831092305	0.3539351110298842	0.0820721673754262	0.2101893493331842	0.1421706091399898	0.5907806934558849	0.2594323777598136	0.5898725886853041	67867.60609140378
55	A-1	2	4D	0.52	0.9791666666666666	22.0	3500.0	12.975	13.185620000000002	13.1224605305599	22.2698774637439	0.799052837498618	0.737431949629709	0.1457859681943663	0.2417825736811029	1.5109331330794946	0.059301857634928	1.058476303828851	0.1526052884263319	0.4009686647735947	0.6382221448598292	9.453507508544327e-15	5.7043850582851305e-15	0.0034146641476043	37.705148895352615	9.460068297526771e-15	0.0056589014992335	0.4436031731753461	0.3612136076230452	1.977225454384662	0.3523813807851279	0.0821249803946198	0.2142719201881493	0.1444428294520423	0.5990313352263961	0.2631454123318396	0.6029961813041539	0.0122317705476621
55	B-2	2	4D	0.52	0.9791666666666666	22.0	3500.0	12.975	13.185620000000002	13.4020782925598	22.9526604320367	0.801588501535317	0.728429692310958	0.2032763215947864	0.2289137160333416	1.5127801850094809	0.067825339151322	0.5261209089057659	0.1354142824504254	0.4338247636976289	0.467197531583877	0.00350969857431	0.1775907478600874	49.99999999999999	8.781391606427272	0.3365602793939449	0.9881422924901184	0.1829936158944664	0.1211595497563125	1.975702977252508	0.1955496578192611	0.0662959662991188	0.0620971401875905	0.1	0.229614956908426	0.0937885642732072	0.5276640136497417	0.0785596576896055
55	B-3	2	4D	0.52	0.9791666666666666	22.0	3500.0	12.975	13.185620000000002	13.2653405440035	22.4219897100394	0.799549171021301	0.739944382203004	0.1965901256522533	0.2284839029260105	1.5113374687937622	0.0680496095823307	0.5622348893055485	0.1413704481291194	0.4463009332623157	0.4837532365264751	0.0032358210242755	0.1637325438283438	49.99999999999999	11.1791655009714	0.3198211610542483	0.9881422924901186	0.1791432480213438	0.119733867254328	1.974916868959728	0.2030381255370389	0.0672606770907432	0.0683694115005803	0.1	0.2338779056834359	0.1022928493197821	0.5119503140086825	0.0764799050916801
56	A-3	2	4D	0.49	0.9215686274509804	21.5686274509804	3277.0	11.894	12.39555	12.7130303391584	21.4019212071109	0.796530383311132	0.745751226252705	0.1927346335384844	0.2331740888530925	1.5071677942181307	0.0676785169701468	0.6098193488744881	0.1487835711421131	0.4717603320446329	0.5040581880607312	0.0030181104858275	0.1420593396523303	46.468965937269104	15.776749695211544	0.2874159885176961	0.9872527473664996	0.1747280880906261	0.1190304445135405	1.9731130609654384	0.2181060743483764	0.0688022314145269	0.0812324556072697	0.1	0.240823679437671	0.1192433727116786	0.4942638730189634	0.0812237874697721
56	A-1	2	4D	0.49	0.9215686274509804	21.5686274509804	3277.0	11.894	12.39555	11.776083677716	21.743332980292	0.792437889400448	0.683454384020643	0.1542103815630778	0.2510308833013249	1.5074712217968156	0.0613785340090271	1.0278468463463593	0.1650141599825133	0.4360625780809453	0.6314149569127604	1.1065176053783179e-15	6.82571186005158e-16	0.0168642800507338	3.204536169463186	1.1856857896480453e-15	0.0273387203573318	0.3960136863152814	0.3246453978555651	1.9775850214238169	0.3517159705057776	0.0823603468975593	0.2197832778867716	0.1446496946303795	0.5639374219190534	0.268099245026474	0.5756762811568907	0.0061232179055629
56	A-2	2	4D	0.49	0.9215686274509804	21.5686274509804	3277.0	11.894	12.39555	12.1373228450403	21.9140944120609	0.794468243314653	0.697144545078566	0.1945512504196953	0.2305223400218975	1.5076280867619325	0.0674311699628884	0.5848926158254122	0.1466014658236364	0.4703154865532162	0.4936249985978418	0.0027833503927518	0.1385787132014292	49.18845407402007	13.833818479449524	0.2827305801210316	0.9879490132570096	0.1779099665955282	0.1210430024430475	1.97364352767171	0.220675558847415	0.0688002212103183	0.080360998089749	0.1	0.2469539333257521	0.1181152334060577	0.4901440556663742	0.0883907460603202
56	B-1	2	4D	0.49	0.9215686274509804	21.5686274509804	3277.0	11.894	12.39555	12.3383566567838	21.328435659702	0.79468074649059	0.727956831007115	0.1887813329817003	0.2331593763968055	1.50637240554787	0.0677329003565246	0.6350764385131609	0.1525711346330604	0.4782833051276599	0.5142001083574177	0.0029252877395256	0.1350522576078015	45.56717042327614	17.158080241684758	0.2770347096128897	0.987003751919405	0.1733643947932384	0.1192805571237709	1.9729833112224728	0.2251933812884067	0.0693892418453506	0.0880337641764899	0.1	0.2446819852594503	0.1279497733397689	0.487492191128378	0.0760615017006175
56	B-2	2	4D	0.49	0.9215686274509804	21.5686274509804	3277.0	11.894	12.39555	12.7282551424987	21.7789786802396	0.796218728990734	0.734004924299966	0.1929584791084845	0.2277183268881696	1.5076566786866998	0.0675100841224388	0.5801415928456949	0.1467272635250086	0.4696486454662079	0.4915864302746842	0.0027094631544924	0.137097930747627	49.99966603358722	13.609731920051244	0.282752198084888	0.9881422142272296	0.1767267398631686	0.120053291305667	1.9738750947657209	0.2212236221101962	0.0687502974169352	0.0793159393910551	0.1	0.2475991564489041	0.1167585431046335	0.4848695489414637	0.0945378746205714
56	B-3	2	4D	0.49	0.9215686274509804	21.5686274509804	3277.0	11.894	12.39555	12.6802594903009	21.3767285422815	0.796392151698717	0.744834744902821	0.1901929190730731	0.2342185404183953	1.506611631949779	0.0676493859080136	0.6314787614590813	0.1517906269645562	0.477092803260988	0.5127808787468591	0.0029485598591015	0.1367667785015751	45.78426385661057	16.912530432614982	0.2785878762276089	0.9870645785852116	0.1746359055536657	0.1199433616584889	1.9730302806987727	0.224308332474362	0.0692626683226616	0.0868195934748954	0.1	0.2443193205114033	0.1264081489516633	0.4909286805784594	0.0780325846047568
57	A-1	3	2D	0.49	0.8823529411764706	20.0	1200.0	13.079	10.95191	12.3083159376123	20.8613447602496	0.796480222439415	0.740766508540391	0.1839820243653677	0.2096756021568296	1.505657946461069	0.0662752880559786	0.5396526529159031	0.1481663384967312	0.4889096234165529	0.4735237982688442	0.0014746881215998	0.074619218938976	49.99999999052186	1.9433205320623856	0.1739928434964257	0.9881422924878974	0.1785891415811524	0.1445689036384183	1.9722841955666723	0.1866330328695981	0.0711222186141494	0.2095055632076316	0.1553051715982709	0.3370975330870213	0.2588068232384651	0.428863724734224	0.3495649981677747
57	B-2	3	2D	0.49	0.8823529411764706	20.0	1200.0	13.079	10.95191	11.7111399630144	20.7725148081521	0.79267578801213	0.711237261496083	0.1819755355269818	0.2079565395082677	1.5057466236023878	0.0662804965599804	0.5427719605607847	0.148415373150934	0.4896153380333359	0.4749608664658118	0.001459177823871	0.0738343978878728	49.99999999999999	3.4891805725968683	0.1738365803058644	0.9881422924901186	0.1760993298782424	0.1429435906183982	1.9722252142294985	0.185808930426104	0.0712921773398616	0.2117213774591387	0.1558595972027958	0.3365480816607996	0.2608301115856673	0.4247345280145388	0.3534674931662681
57	B-1	3	2D	0.49	0.8823529411764706	20.0	1200.0	13.079	10.95191	10.9324930043603	20.3791829954065	0.791065586879198	0.678140913382414	0.1813778948291101	0.2083685795246301	1.5051127315295807	0.0665014290976885	0.5488091187790547	0.1499877514046601	0.4949653422478966	0.4777200231160463	0.0014132342452597	0.0715096528101411	49.99999999999999	4.827436278265742	0.1698663006579451	0.9881422924901184	0.1732346478603019	0.1410978678873561	1.9721182423077288	0.1846300849319164	0.0714385428922054	0.2144898819613661	0.1551445797669056	0.3351683570941583	0.2633425984922672	0.4209761002221274	0.3585545780775171
57	B-3	3	2D	0.49	0.8823529411764706	20.0	1200.0	13.079	10.95191	8.34005411766474	20.7061890140375	0.780564136015162	0.516012356504148	0.1831939727500688	0.208132011573381	1.5061584983314742	0.0663191462160615	0.5361291446926323	0.147560703717112	0.488092162703985	0.4718910233023521	0.001515243864227	0.0766713395298909	49.99999999999999	2.619274873948422	0.1798026149156873	0.9881422924901184	0.175963033119878	0.1416161398804577	1.9723982637820447	0.1846605652589405	0.0710333576889958	0.204806199174682	0.1547524171417804	0.3321052223803277	0.2544789035977954	0.4264194909837297	0.3390072417612293
57	A-2	3	2D	0.49	0.8823529411764706	20.0	1200.0	13.079	10.95191	12.0595654890523	21.008271354378	0.792450709319131	0.724384390751349	0.1851983411474976	0.2099609423260746	1.5058499705672796	0.0661288115408673	0.533708547415418	0.1466373292049684	0.4878820634480322	0.4707634502995896	0.0015261621808504	0.0772238063510113	49.999999999984894	1.8260309987484136	0.179443422059569	0.988142292490115	0.1782953647825199	0.1431670884907075	1.972360446489328	0.1848976849938182	0.0710561574489353	0.2029770637354427	0.1542193673223404	0.3326745144923987	0.2527806495383505	0.4303518371677936	0.343584904723869
57	A-3	3	2D	0.49	0.8823529411764706	20.0	1200.0	13.079	10.95191	10.3598724380612	20.6797657962923	0.786172013424044	0.637222661929714	0.1842804114577118	0.2095368845061528	1.5056971509963175	0.0662383834638751	0.5370545726952464	0.1474917657668276	0.488673067242771	0.4723208415777488	0.0014895285306601	0.0753701436514026	49.99999999999999	1.54481785930752	0.1757750639629162	0.9881422924901186	0.1783783358704895	0.1438804343650222	1.9723792302658705	0.1855685078773606	0.071084075239713	0.2066026272914986	0.1546448489076309	0.3355518687943126	0.256139293750198	0.4287874625225777	0.3450113891815999
58	B-1	3	2D	0.36	0.984375	20.0	1200.0	10.457	9.80645	8.14287248188238	18.2828776863928	0.765949055994258	0.581477875057317	0.2068540619407788	0.3272172140732941	1.49684329304926	0.0645404834169467	0.9818747333420728	0.193816511813739	0.6241050861356136	0.62070321539787	0.0022181286406444	0.0013308771843867	9.205621833395512e-16	12.9604279126225	0.0025383970771523	1.5342703055659173e-15	0.1862826744589952	0.1957501741184038	1.9747424166608605	0.2055992592035573	0.0789754852473658	0.4508232968358666	0.1607263694729886	0.373356516787234	0.4290191302318289	0.5242982653760847	0.0515742280643029
58	B-3	3	2D	0.36	0.984375	20.0	1200.0	10.457	9.80645	10.2066685006368	18.3942023903645	0.776872803134063	0.71425473990539	0.2135399986067508	0.2980457842557171	1.4970265142978765	0.0651401170429869	0.7957375021088655	0.1824915699267029	0.6367445801780651	0.570119740213729	0.000495133805099	0.0188229136639226	37.41581202914652	48.21051799964479	0.0402132453864175	0.9842170936782836	0.158998480191366	0.1512087597202333	1.974385738671812	0.1908932934631922	0.0761545779824854	0.3510075790551132	0.1555004468900932	0.3230421744355173	0.3690902015774277	0.4680774576398731	0.9169261680396782
58	B-2	3	2D	0.36	0.984375	20.0	1200.0	10.457	9.80645	10.3163552874635	18.4473288649584	0.778714481725854	0.718148981794898	0.2115378373649304	0.3150513783412085	1.4970331846223908	0.0648614525994439	0.889338183020675	0.1872563635541724	0.6269884978953852	0.5971364953639473	0.0016264161470797	0.0160063454842903	9.241482152664382	18.70441209217992	0.0318544694672649	0.9390335733284276	0.1720350144374128	0.1714257816913371	1.9743362647914944	0.1952793483500785	0.0774010979008408	0.3964586700674392	0.1575087665480824	0.3411570326373497	0.3978676506880183	0.502483505516836	0.1953507513860904
58	A-1	3	2D	0.36	0.984375	20.0	1200.0	10.457	9.80645	10.4734664288502	18.6391586819901	0.777541451340729	0.722670935314539	0.2144625241978859	0.3045408104940125	1.4973630163099514	0.0649323621236462	0.8200187731307816	0.1836067642256868	0.6340857027780787	0.5774703747914881	0.0007122004367675	0.0159399286759565	21.781239680647307	33.672368800814745	0.0331885925578603	0.9731918334926366	0.1657030851712788	0.1598026186785797	1.9746246245493635	0.1928591547776791	0.076850595730646	0.3643913299103628	0.1564847088795085	0.3327257046640609	0.3778459206432641	0.4802833578485488	0.5077858672277535
58	A-3	3	2D	0.36	0.984375	20.0	1200.0	10.457	9.80645	9.32800432237214	18.2811852882914	0.771157961913672	0.661669386129673	0.212929414741032	0.2985221556886925	1.4971542627304	0.0650895704856926	0.8019770638629691	0.1832232911492136	0.6375215694090423	0.5720329415755373	0.0004803538677687	0.0173764759776863	35.57432302232074	48.39754031157401	0.0371090655249235	0.9834136495206895	0.1596528971344379	0.152355573388065	1.974539712626456	0.1917058558146822	0.0763473293937064	0.3542925692088877	0.1556975089070834	0.3253693650660342	0.3712620014453195	0.4682542050544439	0.90184038615236
58	A-2	3	2D	0.36	0.984375	20.0	1200.0	10.457	9.80645	10.3713512518178	18.5780476959305	0.776909087544677	0.718563359234542	0.2108728356726632	0.2929172986711871	1.4978176218909198	0.0646187692925064	0.7890708005932114	0.1848893438532214	0.640438924267708	0.5680565744065988	6.255501044188928e-06	0.0001654976357025	25.856335716913208	43.39524431811552	0.0003618465971761	0.977321122379906	0.1687061437348062	0.1642868100238236	1.9750645660945223	0.2122836016708006	0.0762019873018242	0.3738045478774651	0.1602258997585313	0.3591992291351159	0.3838599323572901	0.4573696063307133	12.778011654074302
59	B-1	3	2D	0.88	0.1666666666666666	20.0	1200.0	0.296	0.0	0.0	0.197293930365047	0.0002045458162602	0.0	0.0175882563439222	0.0167464284549061	1.4609046732244424	0.0851950932667672	0.3521369331584128	0.1	0.7909251861419424	0.3698385399149574	0.0010124082594081	0.0006074932421454	4.769469246266944e-05	47.118553597373705	0.028691592772613	7.948483576312044e-05	0.0063654876577893	0.0038192925946737	2.071305057075915	1.2407349468424318	0.089999999999998	2.4654821608654543e-14	0.1000000018472521	0.1803832210854446	4.109136934775589e-14	0.0211732142917253	0.0059299516803534
59	A-3	3	2D	0.88	0.1666666666666666	20.0	1200.0	0.296	0.0	0.296400969737578	1.12709114587313	0.953143915679457	0.275906608097437	0.0307452083360652	0.04741463005578	1.5403868695017784	0.081623565441443	0.9421795011927404	0.1	0.0769227045728593	0.61094023131811	0.0064748065051068	0.0601068787912215	8.683193056628527	2.600721535806547e-37	0.0975138617471965	0.9353670664457872	0.4184070773117294	0.5088716655618621	1.9928740107457223	0.2346860906965756	0.0676481932364562	0.6162118978277538	0.1827304560062014	0.8255634336799441	0.5066649149941344	0.6163931744088638	0.2879015794069399
59	A-1	3	2D	0.88	0.1666666666666666	20.0	1200.0	0.296	0.0	0.314597176080545	1.20481130692805	0.95271432131549	0.27407731537299	0.0223861377567555	0.051475834008373	1.478925222175535	0.0787522862380396	1.699451319727492	0.101686810975267	0.0910590010044965	0.7390681877661555	0.0055319831388619	0.0449306198775424	7.521973395382638	3.487083902291244e-18	0.0794807396398142	0.9261263278280252	0.3857783442718193	0.4688955309868499	1.9936097426535115	0.2541043384625197	0.069194187814906	0.6154532206101917	0.19352031047372	0.8294602593556892	0.506356978758275	0.5653019848727655	0.14254756554151
59	A-2	3	2D	0.88	0.1666666666666666	20.0	1200.0	0.296	0.0	0.305131885007729	1.15531728890584	0.951844177144358	0.277472828979989	0.0219880911855832	0.0487533723143102	1.5047699543785862	0.0732085811308458	1.61726260378054	0.1	0.0823311352603483	0.7293960584655281	0.0059680406752507	0.0455528146834253	7.032792261676656	5.165718331223764e-32	0.0769262672336173	0.9213918079478556	0.4094040519481957	0.4978558445367723	1.993285872155269	0.2448848059228984	0.0684752508587753	0.6160501152044506	0.1873801600589904	0.8407425975060342	0.5065992819719244	0.5921620315345079	0.1956283663003
59	B-3	3	2D	0.88	0.1666666666666666	20.0	1200.0	0.296	0.0	0.30030991909745	1.13578889975709	0.950663105206472	0.278128451329653	0.02190989053426	0.0481332255649279	1.5073354061529898	0.0726851293204518	1.5968720240597785	0.1	0.0809332797476219	0.7268844095473476	0.0059934725532115	0.0465951162673614	7.174310444183832	3.446084440401679e-33	0.0783470364904679	0.9228227372308144	0.410905297852492	0.4999988916991338	1.993525772092204	0.2427882854995932	0.068326518059282	0.6168226944560468	0.186640231530394	0.8407196837619102	0.5069125495985127	0.5947272335314232	0.2068266395787678
59	B-2	3	2D	0.88	0.1666666666666666	20.0	1200.0	0.296	0.0	0.0	0.292924321001961	0.000558648244777	0.0	0.0048026470323654	0.0509080480418648	1.6003455826918318	0.0851950932667672	9.999997813453904	0.19214400467066	0.1760733606885134	0.9433962147389826	0.0041836600998953	0.0238339609322265	5.09691618418591	9.451105699755477	0.0824334414944528	0.8946798617705591	0.16189366931649	0.2143877483202268	1.97996902274647	0.2244196496764366	0.0729958511953126	0.7242503504019967	0.1895013561727311	0.7414931978170336	0.5469134670662079	0.2891297572943184	0.3259686310583122
60	B-3	3	2D	0.43	0.631578947368421	20.0	1200.0	11.645	10.634	10.3733852731132	18.4637746652632	0.805511577575904	0.697474332494233	0.1492308913952983	0.1804197445245834	1.503741362036234	0.0667979106467937	0.6089972983319436	0.155700315497966	0.4849111825431214	0.5037209753670902	0.002622245657579	0.0614297824887786	22.82640259932485	9.75128684353716	0.1651038169269858	0.9743878729371238	0.1564320971122585	0.1302180825195225	1.9694757146758384	0.1879389214979916	0.0727794382072703	0.2324256014165413	0.1480196103754771	0.3499850005298927	0.279214864392712	0.3720676095328847	0.1382446326398697
60	A-1	3	2D	0.43	0.631578947368421	20.0	1200.0	11.645	10.634	11.0874478878238	18.8237945002637	0.811545377056326	0.725791053382689	0.1485933546003227	0.182882085773361	1.503756152541046	0.0664922789939515	0.6307554820689389	0.1570544923056711	0.4832749014009642	0.5124945541649094	0.0029101070843148	0.0580956270600058	19.36339838253172	7.592869057148963	0.1535205502525011	0.9699449969137014	0.1620421840008223	0.1374447652287147	1.969652963276848	0.1913705558206019	0.0733978821146402	0.2482036086851138	0.1491576508990396	0.3632045483465346	0.2926226747253284	0.3784224780620816	0.1316174613516514
60	A-2	3	2D	0.43	0.631578947368421	20.0	1200.0	11.645	10.634	11.0602927872168	18.8927940220419	0.811770269297065	0.721169402848971	0.1505311752361173	0.1813527783792144	1.5041636603251451	0.0664814499944765	0.604752291973749	0.1538353431101344	0.4768109538247922	0.5019723108249761	0.0029685803958383	0.0613910833738529	20.08028322895279	6.3317600600751245	0.1614088368616862	0.9709868577060884	0.1643318822709225	0.1376013818376532	1.969832709702962	0.191087521586382	0.0730719192416413	0.2373383176540227	0.1484791208518178	0.3617802093135215	0.2834437558273642	0.3803452435907206	0.1411397737191355
60	A-3	3	2D	0.43	0.631578947368421	20.0	1200.0	11.645	10.634	10.4252115267716	18.4235908076651	0.804447446413391	0.703417095253174	0.1494128038469755	0.178500251469396	1.5035172529632068	0.0667960535117393	0.5946784135863692	0.1544899058094475	0.4840137832680149	0.4977727954430616	0.0025255342178235	0.0603507968922586	23.2962499364854	8.819192491290726	0.1636446855766465	0.9748914577979908	0.1566842274802659	0.1299406217105887	1.969359807926586	0.1891235905665662	0.0726483400541206	0.2293152654880621	0.1476577960575346	0.3523415311553385	0.2765115692801185	0.3687916700722434	0.1419388536728889
60	B-1	3	2D	0.43	0.631578947368421	20.0	1200.0	11.645	10.634	10.1243173550461	18.5961816788762	0.80537166133134	0.675998333923742	0.138526655908259	0.1722613013065569	1.504741065443491	0.0653934324381712	0.6435245778302703	0.1655199211569271	0.4945192813578699	0.5175004895786672	0.0001199890009874	0.0039488397780544	32.310014630987126	41.59702584704324	0.0113361352458708	0.9817684675401188	0.1791397625534384	0.1721307786739778	1.9716331597556045	0.2357330638597644	0.0751725513747533	0.3608742147496715	0.1763414227789775	0.4941445833962593	0.3755686324080275	0.3483409197585891	0.5442308596965428
60	B-2	3	2D	0.43	0.631578947368421	20.0	1200.0	11.645	10.634	10.7333177661583	18.8685235409159	0.807650491851314	0.704324194382193	0.149833179779025	0.1785750254908558	1.5039778734720624	0.0665781447924326	0.5918256407173593	0.1539825691275081	0.4805847545927162	0.4965706563932789	0.0026684343214004	0.0594749422932829	21.68832908357626	6.607514548760711	0.1600601790080492	0.9730800816090728	0.1605283923816665	0.1335286638397333	1.969621613530356	0.1911181623032437	0.072884875496441	0.2318071455064494	0.1478030417547713	0.3593550663992346	0.2786789543209714	0.3715786316238721	0.1501384399352276
61	A-1	3	2D	0.61	0.9743589743589745	20.0	1200.0	13.399	12.475	12.40395474225	21.2421186335558	0.812662562556706	0.718541886256896	0.1876241365820472	0.1912056782408204	1.5153489996104013	0.0668214913957186	0.4190889174709512	0.1211977129849289	0.4024020623275901	0.4112388136954665	0.0029631505355624	0.1499345429828536	49.999705004320745	0.7624419173256219	0.3155448617716014	0.9881422233598246	0.1840350689803194	0.1340205598489699	1.9761326718974044	0.1717071868759495	0.0660607594501864	0.1282338121290459	0.1568624278986788	0.2820530759008085	0.1760887918045782	0.4751607810726441	0.0943132705336728
61	A-2	3	2D	0.61	0.9743589743589745	20.0	1200.0	13.399	12.475	12.4282190027923	21.5214243348197	0.812616508726282	0.710644249396936	0.193073104341741	0.1933030472841972	1.5157433733018728	0.0666042522909985	0.4011909630978385	0.1172241289256666	0.3978309697329231	0.4007137278351896	0.0032191974222231	0.1620079393659258	49.7255681827811	2.21436894075278e-05	0.3334234846676826	0.9880776308809708	0.1834885556739791	0.1305814199012519	1.97678110872832	0.1693677998206432	0.0652076927564517	0.1116597513213187	0.1551302012139034	0.2687455455993942	0.1569004726120919	0.485892406551375	0.1037216563804348
61	B-1	3	2D	0.61	0.9743589743589745	20.0	1200.0	13.399	12.475	12.5965933695558	21.5287041052187	0.812563708291057	0.72007511082596	0.1862228528090371	0.1908850409393329	1.5150481242237248	0.0669702508233194	0.4250355316760009	0.1226280721038421	0.4048880433744957	0.4146544373745169	0.0029064439109474	0.147066059726062	49.99999925411304	1.0907311237628998	0.3119431930143056	0.9881422923153258	0.1827180213625733	0.1335003142700084	1.9758827489797453	0.1714038454790638	0.0662752639866498	0.1306357264295206	0.1568486115339194	0.2831687636111987	0.1787973427851836	0.4714514149354034	0.0998818105477136
61	B-2	3	2D	0.61	0.9743589743589745	20.0	1200.0	13.399	12.475	12.4154721115074	21.6177919367547	0.813232395047641	0.706215484548473	0.1905407909029706	0.1914558929638991	1.5158162005169924	0.0667139074186975	0.4048026569879963	0.1184725778862815	0.3986717637740788	0.4028678210320777	0.0031312494612941	0.1584410404196665	49.9999417734611	0.0008806163868409	0.3299243917773747	0.9881422788451766	0.1824995682591612	0.1303374608244833	1.9766559159397927	0.1696012741125934	0.0653978164556316	0.1141795570682975	0.1548682197221929	0.2714038444485466	0.1598751405556943	0.4802343942080489	0.1060870890830328
61	B-3	3	2D	0.61	0.9743589743589745	20.0	1200.0	13.399	12.475	12.7222323082391	21.6608857886893	0.813871342380668	0.721657870541246	0.1871207282686304	0.1905432058002969	1.5152795722178105	0.0668352422689097	0.4182902106214181	0.1210488483940791	0.4030837326670175	0.4107770125435594	0.002958105940296	0.1496801605789766	49.99999999999936	0.4625781133191312	0.3166401949571821	0.9881422924901184	0.182213514362424	0.1324903413646762	1.9761726461782785	0.171374264800788	0.0661033490877675	0.1271158883481712	0.1566890392418539	0.2802760723758003	0.1748220474688667	0.4727137077439498	0.0926559660232189
61	A-3	3	2D	0.61	0.9743589743589745	20.0	1200.0	13.399	12.475	12.2835113163079	21.2267103786325	0.81212304861525	0.712554356512972	0.1899254578122201	0.1923767442279344	1.5152294789616745	0.0667540694047352	0.4129065710513537	0.1201004249497684	0.4022030208168839	0.4076452684306059	0.0030102358859133	0.1523179191061036	49.999994445248326	1.825078959227919e-05	0.3184518348872277	0.9881422911884064	0.1841496587437878	0.1336128934744929	1.9763090402775607	0.1713554048491662	0.0658573491221857	0.1255668806880173	0.1568240399790816	0.2793451442958885	0.1730603808279518	0.478307556808531	0.0880684484671497
62	B-2	3	2D	0.37	0.3968253968253968	20.0	1200.0	7.883999999999999	8.034469999999999	7.98240522267066	15.0108099668036	0.809711523623482	0.656748854127821	0.0721013244176881	0.0915726062964191	1.5148228454924717	0.0613167271052944	0.6700544273768467	0.1887424110361646	0.4288254241616989	0.5275793012751179	8.602248337755791e-14	7.015422353722766e-13	7.555335766036482	24.849025539463696	3.2852526406974928e-12	0.9264285349845748	0.1265103292690554	0.1219702508584044	1.9745076117047848	0.2169206821074031	0.0707595195851366	0.3641129824190451	0.1447386632960507	0.5711745758350156	0.3776662995507573	0.2135428571555252	5870.783522834532
62	B-1	3	2D	0.37	0.3968253968253968	20.0	1200.0	7.883999999999999	8.034469999999999	7.62374254665393	14.8373623546911	0.804778360349925	0.638462256622968	0.0963558468804653	0.110401828491027	1.5076587952245342	0.0671315532657065	0.5457719698939131	0.1474333730885162	0.3959097257227725	0.4763355922770968	0.0043599599508296	0.0680964252000332	15.01858961274988	5.518043680463173	0.2441991893806145	0.9615842393662608	0.1237337813364855	0.1003578120180545	1.965803683364102	0.1844184872422663	0.0717749913269279	0.2110785182030308	0.1421647768349238	0.3598910848966131	0.2602442469696791	0.2788560657091148	0.0559010827245517
62	A-1	3	2D	0.37	0.3968253968253968	20.0	1200.0	7.883999999999999	8.034469999999999	8.23591890708713	14.7131516776563	0.813833492715057	0.687813650559908	0.0966347805827003	0.1104044396485113	1.5082797008855684	0.0671001574601919	0.5424917507214377	0.1467728368824514	0.3929216893845728	0.4748320943051676	0.0044683916789517	0.0672012454701851	14.439246847301868	5.041335505704335	0.2391645388804666	0.9601043851402942	0.1263193192697123	0.1033776319932605	1.9660634021939587	0.1853330554253414	0.071995190557799	0.2183833841958288	0.1425524012445232	0.3679137717349604	0.2668472850416187	0.2809833171119569	0.0563202544157044
62	A-2	3	2D	0.37	0.3968253968253968	20.0	1200.0	7.883999999999999	8.034469999999999	8.37404916717458	14.7891886765267	0.813739072064596	0.695834547960191	0.0979669820628777	0.1146594498135656	1.507987067416865	0.0671872486906806	0.5703887105552996	0.1482133519351801	0.3964585348886543	0.4873498055912334	0.0046376232166995	0.0719617472474931	14.916945617394465	6.480211134181305	0.2488224819511856	0.961332596324408	0.1264024735447327	0.1025879880704148	1.9660199582523403	0.183445741651427	0.0717372306681048	0.2115979473622392	0.1420446771494665	0.35471898316016	0.2607176965515378	0.2892091851314736	0.0574980425704821
62	A-3	3	2D	0.37	0.3968253968253968	20.0	1200.0	7.883999999999999	8.034469999999999	8.13155789800448	14.3749541654358	0.811392019814963	0.69716657637921	0.0969663925478856	0.1117953086614044	1.5077647182828957	0.0671776680202313	0.5529284087390974	0.1477598574578977	0.3950560106147078	0.4795860736433832	0.0044807072419272	0.0678993356434959	14.553709443041155	5.3959616963661405	0.239938875645943	0.9604057341698916	0.1262447235414014	0.1032913264374528	1.9662493994481125	0.1849755881892816	0.0719658341251307	0.2181833152304291	0.1425235626208592	0.3650051137393493	0.2666680084633369	0.2829859707423532	0.0561297123365253
62	B-3	3	2D	0.37	0.3968253968253968	20.0	1200.0	7.883999999999999	8.034469999999999	7.85915279516575	14.7837400794189	0.80613945611496	0.659449033179578	0.095743082756648	0.1116238409273744	1.5078708413644468	0.066882054990256	0.5658684649949158	0.1487655289084247	0.3944507779002029	0.48536218448741	0.0045363134385027	0.0669501960147763	14.158723558765844	5.210527233116943	0.2365852731745878	0.9593460777545608	0.1268392055653535	0.1044114385120655	1.9660226029911287	0.185712038101994	0.0722725505166747	0.2231795370104856	0.1434684355256854	0.3689639489252092	0.2711189078156625	0.2829854754542164	0.0563097754337856
63	A-2	3	2D	0.44	0.9821428571428572	20.0	1200.0	12.825	11.67193	12.175518260644	21.4700925006835	0.780848765992327	0.726250781173866	0.2166909383230692	0.3174573636472716	1.503748917527486	0.0644126369897176	0.8650237158231673	0.171066288085885	0.5514352391061956	0.5904503159098198	0.0034746969058156	0.0507996852749741	14.019889634100338	11.809056102939412	0.0882409413166107	0.9589600185079016	0.2149864175515729	0.2074358722661578	1.9742490856532544	0.1951940384405575	0.0754111494600308	0.3648789659765192	0.1634602740681087	0.3603238195771936	0.3781603484404267	0.5756929211884037	0.0480667887510149
63	B-3	3	2D	0.44	0.9821428571428572	20.0	1200.0	12.825	11.67193	12.1313944196578	21.1931254171466	0.780764803371123	0.733154471071282	0.2131744844444967	0.3132007566875385	1.5032410008374368	0.0647400537762414	0.8692225361946879	0.1727113855383651	0.5524943061543417	0.5916207482400789	0.003336931837393	0.0469908738101318	13.482059838190509	11.971863612672555	0.0828931273854358	0.9573925969002914	0.2133877486737844	0.2066934092190005	1.974228117374326	0.1978272798228098	0.0757364357602616	0.368628285848698	0.1635879116021633	0.3646125664602225	0.3805673355137583	0.5668850397166709	0.0463262973087399
63	B-2	3	2D	0.44	0.9821428571428572	20.0	1200.0	12.825	11.67193	11.9671354274863	21.423081196489	0.778097865268907	0.717916687183443	0.2188883563178012	0.2749625921681864	1.5039053525009092	0.0648082894945093	0.6561773353031708	0.1585069847112042	0.5548139692530162	0.5223604318134004	0.0017302195029533	0.0590216357920839	33.51222431104175	2.130394918507504	0.1190926655418719	0.9824109974615232	0.1875096799125815	0.1616099845257405	1.9742031601552383	0.1844943406468025	0.0731548312658792	0.2618754221173244	0.1549920957468426	0.3260933652051118	0.3038437057109585	0.4955942124860109	0.4929423212833974
63	B-1	3	2D	0.44	0.9821428571428572	20.0	1200.0	12.825	11.67193	12.2581300967406	21.4164439796734	0.779854082048326	0.733944997910231	0.2083810833097665	0.2863309233024933	1.503600560066315	0.0642289383444143	0.774073494362496	0.1716778188341371	0.5669492026191542	0.5633421338366102	0.0002039299674908	0.0044253279635691	21.100233751901143	29.44839884439716	0.0087623653475361	0.9723505282542204	0.2158577831575912	0.2142818050178528	1.9759648371194587	0.2221738447764348	0.0760743607328663	0.3926989978462449	0.1747375375371919	0.4242884320333097	0.3955871807045669	0.5050380562839154	0.5314200762708711
63	A-1	3	2D	0.44	0.9821428571428572	20.0	1200.0	12.825	11.67193	10.434803527736	21.1464019429514	0.770072639963253	0.640790552261865	0.2134666105981796	0.3139699204810089	1.503234081021657	0.0646334501925504	0.8708151293600315	0.1724809329953174	0.5537652349559631	0.5920629397787968	0.0033218675969961	0.0471606385879328	13.59702538131842	12.321217905589275	0.0831796946290578	0.9577376257430992	0.2126161177936111	0.2058424118976752	1.9741159143156888	0.1962479776111024	0.0757754218250635	0.3681411458066822	0.1633523268571108	0.3630550704149793	0.3802556552845781	0.5669729709666171	0.0474047897858597
63	A-3	3	2D	0.44	0.9821428571428572	20.0	1200.0	12.825	11.67193	11.064594353813	20.6589366254433	0.773988551708505	0.691979129815129	0.2138826173663188	0.3156597536581787	1.5031212036812804	0.0646629310229736	0.8758551094292298	0.1733333417319041	0.5541289106136181	0.5934560268371852	0.0033596820434781	0.0464910848779082	13.237941887434502	11.808032795415974	0.0816133634968799	0.9566409510257572	0.213825625846272	0.2074995579910152	1.9744498896968352	0.196373490144659	0.0757053778551127	0.3704148282965633	0.1631985178694209	0.3642577258895018	0.3817077166336981	0.5696503965271021	0.0472724826596504
64	B-3	3	4D	0.49	0.9803921568627452	19.642857142857142	800.0	1.291	12.34484	0.0089299572696001	5.42626384011769	0.0072191543887461	0.227961835145871	0.0511298350514519	0.0910588822433784	1.5046970364423853	0.0758748044375773	1.1809344026192528	0.1903048581457384	0.4661642864466667	0.6630982033265408	0.0016019660688149	0.000961179641289	9.467363121500429e-14	1.488439294491701e-13	0.0049206360828262	1.5778938535831557e-13	0.1156174575243389	0.1033163997251953	1.983531688769527	0.3962876685546613	0.0850448089588814	0.2936055327409876	0.1578892797420496	0.528915077470507	0.3285627964280851	0.1953364616098629	0.2933418490335725
64	A-3	3	4D	0.49	0.9803921568627452	19.642857142857142	800.0	1.291	12.34484	12.46614281364	21.2183052692171	0.798925910195993	0.735385222402748	0.254797278493313	0.4167712509281631	1.5118729044724315	0.0492475588473693	1.035697419504035	0.1220667868789608	0.3432050130603659	0.6331839906051034	1.5273530331154622e-14	3.0405526505500374e-14	1.3907333698404898	47.86923040177319	2.503850517085269e-14	0.6986035352147255	0.7477498611281647	0.7975794580308789	1.9733806425505624	0.357654218133934	0.0733818340792192	0.4666393930552311	0.2499999025560378	0.656794986939609	0.4374856170637121	1.2143507089590724	0.3404057887572529
64	B-1	3	4D	0.49	0.9803921568627452	19.642857142857142	800.0	1.291	12.34484	0.0	0.676803543932733	0.0007535727591682	0.0	0.0156268090626936	0.0146091497946478	1.4619254480674506	0.0851950932667672	0.3348773467466717	0.1	0.6278324168833631	0.3582045793622326	0.001381725184759	0.0008290351110659	1.5232548486795142e-10	28.04859973787996	0.0356280224912446	2.538758080487995e-10	0.0075909870260236	0.0078310019055844	2.0309467369534064	0.7862079347611994	0.0899999999999999	0.4316184020257182	0.1414333359017342	0.3365395606253921	0.4183895917116046	0.0232691868112982	0.0124881043465676
64	A-1	3	4D	0.49	0.9803921568627452	19.642857142857142	800.0	1.291	12.34484	0.0112498040389527	6.42734213222174	0.0081852979187489	0.21383512665054	0.2507227115002122	0.4009295772822956	1.5006534085849366	0.057849914628314	0.999095570095397	0.1267963627950909	0.3665941307100669	0.6247879043500785	1.3453131740692282e-13	3.947510575752723e-12	28.74268876452397	48.41617254993746	3.60944736927686e-12	0.979551976139098	0.5390985651368032	0.6927310781795805	1.9519768340980457	0.3683584280880404	0.0873121120603142	0.6849803783168873	0.2499999999999999	0.6334058692863236	0.5330667999881047	1.0936606554658237	69984.08800379137
64	A-2	3	4D	0.49	0.9803921568627452	19.642857142857142	800.0	1.291	12.34484	12.2235476332176	21.3614329470064	0.797446133000652	0.717572076995964	0.2682665355459834	0.4429153068501205	1.512708443358759	0.0491986687609171	1.0510270502009766	0.1219363996845014	0.3359467695118944	0.6365898427121692	5.116622626582494e-16	3.0735172815038154e-16	0.0006925868513162	0.0461841252924849	2.3312316955204953e-16	0.0011529805202801	0.8288427519725098	0.8754938789076209	1.974389109871956	0.3620349511276451	0.0733159834691625	0.4562846533001456	0.2499999999995545	0.6640532304881053	0.4319712985269429	1.3184091857577418	36118.753578322016
64	B-2	3	4D	0.49	0.9803921568627452	19.642857142857142	800.0	1.291	12.34484	0.0004584043642461	1.78552463179986	0.0029846125915409	0.0860191072755182	0.019879506551846	0.0229571567573347	1.4564835214313958	0.0851950932667672	0.554815221266285	0.1158912312074819	0.5625332612304106	0.480436359903462	0.0019978789299423	0.0144130795786855	6.614190691275628	27.35711616319582	0.3531725093605509	0.9168305877018748	0.0013231052425301	0.0034400736305784	1.9	2.105739783122737e-23	0.0705353434337022	1.9999999999999984	0.1093982936732425	0.0842942294090383	0.7692307692307692	0.0408103099665987	0.0426668890588439
65	B-2	3	4D	0.71	0.9655172413793104	22.0	3500.0	0.0	4.50611	4.69176189286905	11.8997577336247	0.850489359018235	0.463584556269445	0.0758067884496871	0.1672671128723265	1.5300855450733737	0.0442167941901628	1.6064925357356534	0.1110674251252569	0.1966909617502493	0.7280752187997057	8.275858172993008e-12	4.9656942505375495e-12	2.167107482947861e-05	6.853529744712786e-05	5.839206291803612e-12	3.611715355323556e-05	0.6784744873909356	0.6831385762499792	1.9828531662800308	0.3585579113284531	0.0731845231835521	0.4068743761861691	0.2186247303372686	0.8033090382439115	0.4040964650697783	0.8504056891272714	45066.75966695121
65	B-1	3	4D	0.71	0.9655172413793104	22.0	3500.0	0.0	4.50611	4.69927507878698	11.9828301976725	0.852995315510459	0.459753259049301	0.1865212246338746	0.1833554576387048	1.5282453304081045	0.0685196449593378	0.3830273096191383	0.1	0.2525506036570471	0.389640558172832	0.0056033091433253	0.2835274426522495	49.99999999999772	0.7468358301658599	0.3905257455508061	0.988142292490118	0.3263299453575841	0.2591318269899735	1.984728867624365	0.2323582892942929	0.0639536026156229	0.1940792154579114	0.1562531757455388	0.3569236507921467	0.2444078772997405	0.7260147272809278	0.0556637337813544
65	A-3	3	4D	0.71	0.9655172413793104	22.0	3500.0	0.0	4.50611	4.43682727792082	11.286461288744	0.851595175626668	0.46161672288971	0.2089536803106709	0.1944909396861698	1.5334324750327384	0.068142172167983	0.3307849442852692	0.1	0.2466748220429957	0.3553827834412085	0.0068333805796073	0.3457690573281316	49.99999999999999	4.1645060908814614e-19	0.4385423856865471	0.9881422924901184	0.3182763147246146	0.2481907174743862	1.9842624320673907	0.2153227970383054	0.0612322158153592	0.1797963781537773	0.1553785077223056	0.3147827922704573	0.2305683678339953	0.7884507144886876	0.0789663057885405
65	A-1	3	4D	0.71	0.9655172413793104	22.0	3500.0	0.0	4.50611	4.44667025101583	11.4247276785864	0.852793467267238	0.456399545379593	0.2121274897133145	0.1955500591782048	1.5343704908961544	0.0682902282206262	0.3218515688017915	0.1	0.2454586309058653	0.3491359994322397	0.0070459535116815	0.3565252476910882	49.99999999999999	1.4180151907072657e-20	0.4475181421544808	0.9881422924901184	0.3129351417539004	0.2445968592571422	1.9841634099671217	0.2111936033145692	0.0608213276249122	0.1816215778332082	0.1590913459780779	0.3070232269396539	0.2323651022233739	0.7966721661264353	0.0821698777109425
65	B-3	3	4D	0.71	0.9655172413793104	22.0	3500.0	0.0	4.50611	4.45944487455136	11.5094797640703	0.852154397349818	0.454681010652451	0.0731196197580306	0.1643042580368955	1.5305946859755364	0.0440945770398634	1.6470611660812151	0.1114031088417275	0.1955768301499176	0.7329845715564671	6.531290485335129e-20	3.918774292862065e-20	2.5431230716897133e-10	0.0044183904215131	4.664647547349886e-20	4.2385384510196677e-10	0.6757836599707914	0.6757965755380714	1.983150458445329	0.3565442284827448	0.0732231384488521	0.4000191119851588	0.215702149459304	0.8044231698500823	0.4000114669719386	0.8401008335749669	14118.721402987574
65	A-2	3	4D	0.71	0.9655172413793104	22.0	3500.0	0.0	4.50611	4.30269877542281	11.1221353440364	0.850627069570122	0.454792786917918	0.2138901741267836	0.1969764526003479	1.5341443179737078	0.0682344643365288	0.3209233355600054	0.1	0.2462727666489976	0.3484799691440708	0.0071199246343867	0.3602681864999694	49.99999999999999	1.446564899234735e-18	0.450430708105908	0.9881422924901184	0.3138845000141845	0.2425857899015636	1.984475863612414	0.2104437146588242	0.0607747073923369	0.1728504908353267	0.1535108510376388	0.3032965252450943	0.2236532070368529	0.7998304290018811	0.0840772210733347
66	B-3	3	4D	0.4	0.9833333333333332	22.0	2461.0	12.395	13.93096	13.9025607517464	23.4595922721517	0.792710798826158	0.747583258682848	0.2119348565638374	0.328721821204784	1.505847437991488	0.0584816384267533	0.9510512359054484	0.1504807367259385	0.4625050664296154	0.6131655833730462	1.4829093942715774e-12	8.897456365640513e-13	7.450755549708838e-13	1.4972570814248632e-10	1.2518544197531605e-12	1.2417925916165972e-12	0.4569085532074624	0.3820202766969647	1.9748157254467256	0.3368171076779422	0.0829870921079847	0.236097888768359	0.1534609346872981	0.5374949335691328	0.2823806780760452	0.7107420979026384	3871.729904111765
66	B-2	3	4D	0.4	0.9833333333333332	22.0	2461.0	12.395	13.93096	13.7523004678879	23.549015300729	0.792953616385178	0.736469586030547	0.2645810643806873	0.3203491069257511	1.506665439648309	0.0643745940901365	0.6107786612605921	0.1431371099299708	0.5156513359130817	0.5044511278590631	0.0039421428968994	0.1778020609817346	44.50289597101593	8.60259266300193	0.2861998622477218	0.9866970848083552	0.1851669282759553	0.1231002176988326	1.9728269181629388	0.1824930925948568	0.0671639161002217	0.0648067170794978	0.1	0.1981488018391965	0.0974820431481112	0.6212513856063184	0.1517583475541102
66	B-1	3	4D	0.4	0.9833333333333332	22.0	2461.0	12.395	13.93096	14.149636354144	23.7266831826537	0.793722905522375	0.751344884481654	0.2139194174703412	0.3317167555638377	1.5064113866023645	0.0576794293816846	0.9506622048923096	0.1470781295193535	0.4537375384544643	0.6130685341352802	4.055119286858084e-15	2.051889394891329e-13	49.999976221196135	49.91472225319145	2.806669327379336e-13	0.9881422869177424	0.4734027739363539	0.3993595329302752	1.9743146093051325	0.3348837112305748	0.0827803080386699	0.2435935632771908	0.1571174215005572	0.5462624615452549	0.2887570198270349	0.7310762884943179	0.0178420550045954
66	A-3	3	4D	0.4	0.9833333333333332	22.0	2461.0	12.395	13.93096	13.9446797600629	23.4310570471035	0.79202686083092	0.751409624065041	0.2579623868964382	0.3078385276530633	1.5067162312634106	0.0644073350076559	0.5933465624841208	0.1427812138494493	0.5164350107853952	0.4972122777552444	0.003371385820599	0.1644398320403739	48.17514493762592	6.737130917459027	0.2758669848142838	0.9876986526484486	0.1861606019369374	0.1238054092688993	1.9732948006225384	0.1901393688658172	0.0674251898037282	0.0650462449129748	0.1	0.207698004400321	0.0978071004994345	0.5960837689623365	0.1649431864043754
66	A-2	3	4D	0.4	0.9833333333333332	22.0	2461.0	12.395	13.93096	13.7322589116899	23.6819338494083	0.792455072617332	0.731728835442409	0.2685472134476188	0.313287957622484	1.5071242944314618	0.0639044503445575	0.5666028986131781	0.1380964219583138	0.5116302017663045	0.4856861741786672	0.0036583868351493	0.1809797097389186	48.86981221342851	5.0552783802301455	0.2955577549549732	0.9878713911948684	0.1807939441654673	0.1180651396951742	1.972605340970372	0.1702361545934538	0.0661972698925176	0.0530370264344581	0.1	0.1928120432787224	0.0812159560446932	0.6123328070565769	0.1697411959026548
66	A-1	3	4D	0.4	0.9833333333333332	22.0	2461.0	12.395	13.93096	14.1043303222563	23.7326411724075	0.792848263330771	0.749577114212252	0.2124372786277754	0.3300543027977688	1.5062572080970016	0.057887902965618	0.9536552950109924	0.1483641498075198	0.4558773989427707	0.6138139509280565	2.9573206125580684e-14	1.4954846082546997e-12	49.96890355087717	49.89378818313071	2.0655923209940035e-12	0.9881350008034812	0.4675083163925901	0.3939436483235609	1.974488665256208	0.3353023689347502	0.0827673275295031	0.2426452204387028	0.156314417059773	0.5441226010551637	0.287956561733508	0.7239979511228252	520143.28524257615
67	A-3	3	4D	0.55	0.6888888888888889	22.0	3500.0	11.567	10.65377	10.5504889703218	18.5423760474067	0.839995481462385	0.677376699122406	0.1013326492726584	0.1807695536433926	1.5173045841890471	0.0554259897642425	1.183922111391672	0.1408312565123697	0.274378474470843	0.6636624457040177	8.322305906583398e-13	4.993383950491534e-13	4.884962203312415e-08	5.067043207379607e-07	7.579136216078928e-13	8.141603009330307e-08	0.4515975836718308	0.478063301200201	1.978580656590424	0.3370131695519757	0.0762370366551601	0.4586046482206213	0.228102296876207	0.7256215255283991	0.4332161671417908	0.658832854844093	1968.6921407002087
67	B-3	3	4D	0.55	0.6888888888888889	22.0	3500.0	11.567	10.65377	10.7161755624002	18.7985407232284	0.839966527053401	0.678662266000668	0.1754168050653574	0.170948753041125	1.5146986138338816	0.0698712471043397	0.3745289396727545	0.1092058000732896	0.3327475190893223	0.3843179247180908	0.007035215389915	0.257506965987993	36.002570314638426	8.258552814376324	0.5012309394272683	0.9836077085613836	0.1407816798986164	0.0852934247931556	1.9726099864373183	0.1221874914533925	0.0573478873072784	0.0058559952870253	0.2209878170670244	0.1660215414834094	0.009665655424027	0.5137491438222737	0.1836307698238801
67	A-2	3	4D	0.55	0.6888888888888889	22.0	3500.0	11.567	10.65377	10.4395654215925	18.6818269716931	0.839627710390693	0.665543293588939	0.1053162789085386	0.1818359512841653	1.5193259539824688	0.0537149640802159	1.1265702241728437	0.1313335103557323	0.2536949477422881	0.6524902424473091	1.4934491344386473e-12	8.962819896919556e-13	0.0001422941189404	14.054096021115717	1.2504799569690794e-12	0.0002371006348575	0.489454199547281	0.5349144329948826	1.9791930436053684	0.3393104075835164	0.074509041916287	0.4928794430401249	0.2380878308757781	0.7463050522564615	0.4509915948908821	0.7167503842799442	320704.69113040954
67	B-2	3	4D	0.55	0.6888888888888889	22.0	3500.0	11.567	10.65377	10.5392791070712	18.7617858115197	0.839510298831956	0.669130311731502	0.1008054121678716	0.1804256130175265	1.5173021667561497	0.0555768733193026	1.1898405367071272	0.1418179650372847	0.2767836740834522	0.6647746055054411	9.786517583660708e-15	6.819786550605332e-15	0.0968552901791599	8.93864379599286	1.0461960175011824e-14	0.13898910081354	0.4468250486318446	0.471439471203897	1.9784423861076577	0.3363544948628913	0.0764252642913146	0.4550873829643629	0.2273915798055508	0.7232163259165374	0.4313267226130161	0.6518650842214303	7811.484509873299
67	A-1	3	4D	0.55	0.6888888888888889	22.0	3500.0	11.567	10.65377	10.9120666539037	19.1829298696571	0.84015550903503	0.677068160847178	0.1756996767878788	0.1714998500628241	1.5144342749118984	0.0699130980061752	0.3760965597556271	0.109556300713861	0.3342067121711798	0.3853067158128142	0.0070367850804379	0.2575273782694144	35.99730620242107	8.24762397281233	0.501851041583747	0.9836053507140284	0.1402129761106635	0.0841277856669487	1.9726117218826555	0.120209556892604	0.0573653281977091	3.92691660679515e-12	0.1875429125639196	0.1639422462450731	6.544861011282415e-12	0.5131550139991873	0.0211184763335166
67	B-1	3	4D	0.55	0.6888888888888889	22.0	3500.0	11.567	10.65377	10.7650559202427	18.9465579557614	0.839878114929528	0.676502962362362	0.1723700081529212	0.16904314813965	1.514200468851153	0.0699541741084415	0.3806993104605542	0.1110169455241358	0.3370160880500859	0.3881916775099709	0.0067565859458923	0.2497331989686405	36.36144783305328	8.254622209052698	0.4978853428777562	0.9837668696661974	0.1380190385508704	0.0828114231305222	1.9726605616941657	0.119012587127543	0.0578189943012793	1.0468318984667559e-16	0.1798294195026658	0.1650985690721578	1.7447198307779263e-16	0.5015877702388127	0.0205745638793008
68	A-3	3	4D	0.74	0.9615384615384616	15.942028985507244	800.0	0.0	2.70372	0.0	0.256720121742465	0.0002608267789933	0.0	0.0152684052669215	0.0142009946000441	1.4617786435381117	0.0851950932667672	0.3300902322006162	0.1	0.5757947151864364	0.354901299650911	0.0012871021821429	0.0007722613092861	2.9615464396680625e-13	30.0075363948036	0.0313121716579301	4.935910732777669e-13	0.0068414501041196	0.0096900385348467	2.027119875140385	0.7327100974967696	0.0899999999999999	0.8163720245524967	0.1695065516505459	0.3928931131556335	0.5763824831335749	0.0246632944441771	0.0193767544116444
68	A-1	3	4D	0.74	0.9615384615384616	15.942028985507244	800.0	0.0	2.70372	2.70371590123276	8.56662427582342	0.85970084586689	0.367116565411612	0.2804993762857802	0.2197409057373586	1.5439368369095796	0.0702629883430106	0.1833917802137312	0.1	0.2291771677700832	0.2340996993403438	0.011212345862019	0.5673447006181647	49.99999999999999	2.3647920171601586e-17	0.5917079990215557	0.9881422924901184	0.2649424106401091	0.1717398642420045	1.98290002983664	0.1587598595833499	0.0530201003358804	0.0482158285911104	0.1	0.1791148332083611	0.0743823684403187	0.958825470597528	0.1611274476633111
68	A-2	3	4D	0.74	0.9615384615384616	15.942028985507244	800.0	0.0	2.70372	0.0045638802620106	2.97363576115477	0.0064296626503077	0.238703223406986	0.0770407338072917	0.1884709927604712	1.5330065990933448	0.0385915751290085	1.846381069421133	0.1026940715693271	0.1587984134328389	0.7547397633591184	1.5899394942716306e-17	1.0357758143865684e-17	0.0514561202601417	0.0003272128514681	8.72704884648916e-18	0.0789863179727195	0.9173647336732592	0.9983859076718606	1.9830360848365969	0.3771251894834174	0.0715877745688056	0.4883194775475848	0.25	0.8412015865671609	0.4486912966475268	1.186856900432332	50330.868402017615
68	B-1	3	4D	0.74	0.9615384615384616	15.942028985507244	800.0	0.0	2.70372	0.0023720800655201	2.58683018372913	0.0039605205463919	0.231531003127948	0.3349607179144924	0.2693546846374629	1.540391752748674	0.0702381615297773	0.2041381279407896	0.1	0.229500189301	0.2538595309036519	0.0134416703008824	0.6801485159890279	49.99999990807511	7.365816050942101e-11	0.5795117815840876	0.9881422924685768	0.2987978749459657	0.2241545878827458	1.9835663998635056	0.1101315156691666	0.0540177526307545	0.1501880256788363	0.1817401245158141	0.1909880291149124	0.2002005104559393	1.1736577885092363	0.3618873726191785
68	B-2	3	4D	0.74	0.9615384615384616	15.942028985507244	800.0	0.0	2.70372	0.0030090211022568	2.37313884403909	0.0050426400868081	0.251445642331519	0.0929736814609674	0.2063106265900281	1.5307249736144442	0.0399057514085264	1.6190218064737194	0.1025155693714577	0.1600577523457392	0.7296105886613756	5.626360711315799e-20	1.5652339581010402e-18	27.219651785798664	48.881476282926656	1.2143234372833157e-18	0.9784325122176298	0.9805641117365635	1.0826655308683026	1.983119689977569	0.3767661298962325	0.0722464280558657	0.5041251845847374	0.2499999998297977	0.8399422476542607	0.4565833581400821	1.2889761574583307	1708104.2904216996
68	B-3	3	4D	0.74	0.9615384615384616	15.942028985507244	800.0	0.0	2.70372	0.0045569137218549	3.37318669796107	0.0053759630708502	0.251289388889279	0.2894274153933859	0.2400696038135311	1.5423894745380249	0.068714093873154	0.2294639382631799	0.1	0.221484023326417	0.2766412470488542	0.0124640081386604	0.6306788118162179	49.99999999999999	9.595499945813164e-20	0.5818532560926692	0.9881422924901184	0.3032421019390796	0.2131654496142608	1.9849925645524769	0.1549208649440081	0.0539501305587186	0.1029546631261811	0.1316303075551587	0.1966627205809136	0.1464598906966787	1.08391386524401	0.20570067388513
69	B-2	3	4D	0.61	0.6923076923076923	18.33333333333333	800.0	0.099	7.72497	7.86856213362607	17.1555045774266	0.833681160284383	0.550163653244991	0.3037592260981242	0.2631407096644896	1.524465756786653	0.0672759862906591	0.2662805507000024	0.1	0.2707454535021767	0.3073837343858558	0.0112491588953245	0.5362961419779083	47.07433254061402	4.711522453067202e-09	0.5517950542749904	0.9874146114266236	0.2448422132198153	0.1724749801563734	1.9752937227750715	0.1154263577986949	0.0533306349127122	0.10443318530832	0.2236335441605473	0.1774594922228329	0.1482513707280998	0.9719118317987712	0.223113431533947
69	A-3	3	4D	0.61	0.6923076923076923	18.33333333333333	800.0	0.099	7.72497	7.20655480295405	16.8568110495142	0.820742170150735	0.520889408232858	0.3071826285200864	0.2670792021373948	1.52412597393873	0.0669774005476402	0.2694476097951961	0.1	0.2724962808482063	0.3099066657491488	0.0114421923794856	0.5428205617538067	46.84025827838828	5.868840479643304e-09	0.5538304108372805	0.9873525140508492	0.2456453676117508	0.1702207768591175	1.975277900906736	0.11310012031432	0.0531764950949952	0.0929533355913149	0.2238166373259037	0.1736733083145131	0.1341408300055233	0.9801205407503192	0.2418961381215338
69	B-1	3	4D	0.61	0.6923076923076923	18.33333333333333	800.0	0.099	7.72497	8.09979980491964	16.954418503182	0.834148654364636	0.572727362465404	0.2927235864461945	0.2546845521396399	1.5245004572847525	0.0669717494381943	0.2700513519652898	0.1	0.269705056974844	0.3103855322508175	0.0107114293154677	0.5147693846083322	47.457954680705726	1.8524877537458998e-09	0.5451288860604858	0.987515074164384	0.2421614805980679	0.1748537265799532	1.974838780430633	0.1144784213454609	0.0538887785751857	0.1220542513537484	0.224459087803434	0.1851660569646702	0.1690375080887817	0.9443076633279254	0.2111594018148651
69	A-1	3	4D	0.61	0.6923076923076923	18.33333333333333	800.0	0.099	7.72497	0.0133538735234823	6.83273932209245	0.0110924036765563	0.176192225172196	0.2854748856673911	0.2526160883504271	1.5234317041441612	0.0666115689234074	0.2848977652092027	0.1	0.2751937854994789	0.3219555709261495	0.0101074453495205	0.4841458966923316	47.29992722694252	5.3973016336011865e-12	0.5274166935083773	0.9874738849360398	0.2412972007028889	0.181195111597076	1.9741236643632685	0.1184066624222036	0.0547395325898938	0.1509209019800561	0.2254851962612377	0.1973895209921438	0.20098109079412	0.9179570966398348	0.1650862231011055
69	A-2	3	4D	0.61	0.6923076923076923	18.33333333333333	800.0	0.099	7.72497	0.0117948522423855	5.72769681871333	0.013518319406027	0.152331521374648	0.1204390273997325	0.2254310129542467	1.5217801234107575	0.0442572176154579	1.2717438841983475	0.1105571637159396	0.2000961413906356	0.6794433228470385	2.0719952938042853e-14	2.9897758038000614e-14	0.8429452676558378	0.5681083112529506	2.6537724074588486e-14	0.5841838124776967	0.8037723646665614	0.901182480876928	1.9768598856934283	0.3608695278587047	0.0719806976180794	0.5211911736363022	0.2499999999999999	0.7999038586093378	0.4648548667627746	1.1266134938312051	0.3647277499964257
69	B-3	3	4D	0.61	0.6923076923076923	18.33333333333333	800.0	0.099	7.72497	0.0	0.661102528718448	0.0007132337292296	0.0	0.1552388992056235	0.2521992886536573	1.4633630314033157	0.0700860343242544	1.0245882310696095	0.1478083090549038	0.4949578012707582	0.6306756453572441	0.012703967626585	0.2161579772175288	16.414997485130847	1.6907645758582748	0.4242243414003031	0.9647369915555772	0.0482864102132494	0.0411796845641015	1.9042870370929408	0.078592662145247	0.0560407270079253	0.2528214125307284	0.1	0.0808178573289385	0.2964529370580489	0.5095369504352878	0.8656270225121935
70	A-1	3	4D	0.55	0.9777777777777776	20.183486238532108	3500.0	12.45	12.76256	12.8774438648333	22.2991845860216	0.807162194180247	0.715450959816306	0.1933635762273648	0.21023539380704	1.5136686249286089	0.0685684757017164	0.4872543728702894	0.1295471732543956	0.4035832707599654	0.4481512192808806	0.0040369742305742	0.2042708960670584	49.99999999999999	11.047120310409644	0.3921333837416475	0.9881422924901184	0.1665109058164162	0.1064156834553641	1.9742643466463508	0.1643270243679575	0.0636084110884985	0.0390913732262735	0.1	0.2042833454983871	0.0611671114083918	0.5209219733294624	0.0568374614435069
70	B-3	3	4D	0.55	0.9777777777777776	20.183486238532108	3500.0	12.45	12.76256	12.8566654999939	22.0852859882476	0.807896863914777	0.720558747807287	0.1284396969282317	0.2213444390387188	1.5132347821975956	0.0569665853402654	1.1233335513272007	0.1452236415954491	0.3588377563822566	0.6518375682189217	7.945385695635089e-15	4.020117298315395e-13	49.99688040725204	49.969206554461785	6.517307947676302e-13	0.9881415613932988	0.4814819936368034	0.3954926554469142	1.9770533030962647	0.3530512821188205	0.0810237216675349	0.2214069491147914	0.1479774783500152	0.6411622436170916	0.2695459897842304	0.6168370944860351	184890.07497868952
70	A-3	3	4D	0.55	0.9777777777777776	20.183486238532108	3500.0	12.45	12.76256	12.5587443552098	21.7382043595775	0.807120493684513	0.715787612521005	0.1291781795870502	0.2228727163343997	1.5135842501882684	0.0567003792464105	1.1253124099353853	0.1441429447180704	0.3554929502913629	0.6522368954487086	1.8556151379723202e-17	1.1180703340303525e-17	0.0025335271041697	49.37839203113986	1.783377203880527e-17	0.0042047902568113	0.4901681632245972	0.4040671882452345	1.9773148765610404	0.351811173709107	0.0808893372231858	0.2243440079564882	0.1493986759864558	0.6445070497086371	0.2721485275457112	0.6269399045796342	47677.597812414766
70	B-1	3	4D	0.55	0.9777777777777776	20.183486238532108	3500.0	12.45	12.76256	12.9171293724703	22.3364128689667	0.808030450410328	0.71568984232778	0.1286759548764375	0.2217733302084997	1.5133943829586916	0.0567732091406166	1.1235025022465146	0.1443583391392216	0.3555758871266609	0.6518716977678161	3.817993606482277e-17	2.290796163889366e-17	4.956213274526634e-20	49.99989900888506	3.672902767142982e-17	8.260355457544388e-20	0.4872294400418497	0.4019284961459434	1.9772000313184417	0.3519266264190043	0.0808321023275597	0.2249265399714364	0.1495842206843273	0.6444241128733391	0.2726625088086324	0.6237018263544432	45089.72920496042
70	B-2	3	4D	0.55	0.9777777777777776	20.183486238532108	3500.0	12.45	12.76256	12.7015413476516	22.2369755288178	0.806080833135364	0.708601575316545	0.1311581338814145	0.2249126855344895	1.5130998915654816	0.056915045531242	1.1148207196805833	0.1449126839806255	0.3594649108947625	0.6501091961894647	6.787965722839706e-17	4.148334954980249e-17	0.0111308047744261	49.89760707080504	6.630043349533244e-17	0.0182134572295609	0.4861121995290076	0.40077477023038	1.9772441126304048	0.3516839501945301	0.0809722514883404	0.2244491099352972	0.1493995843784278	0.6405350891052374	0.2722413151163594	0.6256874557648695	0.0204035084950634
70	A-2	3	4D	0.55	0.9777777777777776	20.183486238532108	3500.0	12.45	12.76256	12.6638415365589	22.201431693052	0.805520350457467	0.708121807512401	0.1940307171280313	0.2128564072413554	1.5133516913050111	0.06845864179093	0.4970242773514149	0.1310596826006752	0.408624045064954	0.4530658870662356	0.0039587321629011	0.2003118474427966	49.99999999999972	11.158206966488072	0.3845420414509684	0.9881422924901184	0.1676997057490233	0.107741882181436	1.9742548503770403	0.1669836135086753	0.0640079008802196	0.0424691188348344	0.1000000000000003	0.2068339134840776	0.0661029730298249	0.5209101368655881	0.0614500235099595
71	A-1	4	2D	0.54	0.9782608695652174	20.0	1200.0	12.204	7.07995	6.9662669469582	23.6122211368407	0.508760338099559	0.579895880281508	0.2087603194289921	0.2369620558596495	1.5155484754967117	0.0660450398640482	0.5350914604259837	0.1331619987000973	0.4117686544605035	0.4714082336811621	0.0030342861182687	0.1535348775843968	49.99999999999999	5.347130937699224	0.2667973559156254	0.9881422924901186	0.2314747707518013	0.1849768266218224	1.9772900153827029	0.1876553072279792	0.0679907809518963	0.1991230578651862	0.1703989668936239	0.3214339896238709	0.2491769645555374	0.5754737600658688	0.217545651691159
71	A-2	4	2D	0.54	0.9782608695652174	20.0	1200.0	12.204	7.07995	6.86513948469782	23.5061851744671	0.513753737240781	0.568476110069955	0.2121293027308218	0.2403166352120113	1.515089500190944	0.065983495438322	0.5328780706782283	0.1323945968908801	0.4156578052404697	0.4703754838852219	0.0031309150516644	0.1584243016142209	49.99999999999999	5.557912419878922	0.2740147283088707	0.9881422924901184	0.2285138488561989	0.1794188671812526	1.9771884076274195	0.1841483871330597	0.0678388520720053	0.1851553333826992	0.1673443444947129	0.3103274664506595	0.2358200033934574	0.5781598040074849	0.2180643265737697
71	A-3	4	2D	0.54	0.9782608695652174	20.0	1200.0	12.204	7.07995	7.13038362937649	23.4982699629382	0.515169066868824	0.589016186201095	0.2144787574715804	0.2397318469721932	1.5159083044623929	0.0656941689223747	0.5177416812663079	0.1300939278957302	0.4087116757594305	0.4632033411152297	0.0032353089555688	0.1637066331517854	49.99999999999986	3.8705962697382414	0.2790985562137742	0.9881422924901184	0.2338543333811354	0.1831164464675983	1.9775353013672632	0.1855746455186309	0.0675282824296231	0.1830363620808148	0.1680225622346951	0.3121897680267953	0.2337520592203663	0.5865549265915768	0.2002734245986577
71	B-1	4	2D	0.54	0.9782608695652174	20.0	1200.0	12.204	7.07995	7.15442496503886	23.6534516953595	0.516051174621269	0.586121209263996	0.2054143669185753	0.2370217590299841	1.5151778075605682	0.0663571234417687	0.5538713800088663	0.1372998444828553	0.4186266256003313	0.4800113683421201	0.0027562389105717	0.139465688874928	49.99999999999999	6.246788355774792	0.2463235905415377	0.9881422924901184	0.2313526491596319	0.189701476868048	1.977180852059596	0.191329707141892	0.0686928672907691	0.2199667371742744	0.171981449481924	0.3350497838581312	0.2682630004386666	0.5661889247729601	0.2499772982721902
71	B-2	4	2D	0.54	0.9782608695652174	20.0	1200.0	12.204	7.07995	7.03778538730676	23.6705463960261	0.517461982262053	0.574578390307058	0.2133780790155972	0.2391645722722565	1.5156099225527069	0.0658219263934072	0.5208488396541165	0.1305404219451942	0.4114891112982343	0.4646914206690401	0.0032325174193725	0.1635653814196483	49.99999999981429	4.693973920114901	0.2814186599631895	0.9881422924900752	0.2298281718074701	0.178487302623093	1.9773766838861464	0.1837079308668616	0.0675752719899384	0.1766119410835935	0.1659360783932119	0.3070922287385761	0.2274133730639911	0.5812172563149979	0.2009468285977641
71	B-3	4	2D	0.54	0.9782608695652174	20.0	1200.0	12.204	7.07995	7.3257020342422	23.6067759127651	0.524746614104171	0.591374954537594	0.209721591112606	0.2382863632636976	1.5157043536947366	0.0661132680818041	0.5362032969497845	0.1341678214639166	0.4144412422706613	0.4719254893813977	0.0029619904774106	0.1498767181569779	49.99999999999997	4.854113519299759	0.2606741418588379	0.9881422924901184	0.2327415193314041	0.1867950524710251	1.9774159004260952	0.1885753035450592	0.0681601135744169	0.2025858600890408	0.1695049515977542	0.3248846158705008	0.2524164331359706	0.5749581338917006	0.228741442155242
72	B-3	4	2D	0.43	0.7894736842105263	20.0	1200.0	11.675	12.5696	11.3116249590845	19.2714985957838	0.804270365904631	0.729806022280122	0.18569916558247	0.1993888683512481	1.5055540037099555	0.0662596526503177	0.4737197861166394	0.1391722460395332	0.4856817708059964	0.4411949861052283	0.0016116867101558	0.0815513475337502	49.99999999991658	0.0003779373499441	0.198647011788204	0.9881422924900988	0.169895470560584	0.1295937599328694	1.971595145624426	0.18404460902313	0.0699911393413168	0.1627852555766448	0.1467353827747928	0.3156712174057996	0.2134090222464822	0.4105339758178677	0.3919142578423917
72	B-2	4	2D	0.43	0.7894736842105263	20.0	1200.0	11.675	12.5696	12.9582599546397	21.8354670809922	0.812009611518917	0.730841216510267	0.1885762238359178	0.1997096323264305	1.5066639076437591	0.0662273572717611	0.4590393012652542	0.13469822176821	0.4712508275037001	0.4334487877048862	0.0018314192183234	0.0925563374619285	49.93803986323547	8.437763314661981e-07	0.2184033394461014	0.9881277548234222	0.175936995721774	0.1315203042524276	1.9721049529472623	0.1823755692515262	0.0692522960258301	0.1475420602294088	0.1446405304615103	0.3103458330501985	0.1973695770163495	0.4237862740407868	0.3277049595353775
72	B-1	4	2D	0.43	0.7894736842105263	20.0	1200.0	11.675	12.5696	12.6643530590704	21.1177504271284	0.810929733770069	0.739523759603146	0.1781835382212261	0.1952233371620743	1.5038487837562158	0.0666619939655509	0.4956306015188235	0.1442800001995796	0.4923305386359611	0.4523701700479642	0.0013589654957023	0.068760089642521	49.99737709306858	0.0050337131516808	0.1734049446263428	0.9881416778008796	0.1688050290637075	0.1325455752413782	1.9710537357690472	0.1865505309318906	0.0710667119677026	0.1851992086761536	0.1469513457840683	0.334264516737696	0.2358627041771981	0.3965290020459736	0.4130752272359241
72	A-2	4	2D	0.43	0.7894736842105263	20.0	1200.0	11.675	12.5696	12.8778176990917	21.666766684486	0.811552682679952	0.732371521758152	0.1864205919390375	0.1986970240027836	1.5060860545272114	0.0661716836939267	0.4658534120938784	0.1366092388307054	0.4774539045623606	0.4370708080567151	0.0017595566733603	0.0886327043704174	49.7721793746782	0.0070509648027188	0.2129776778789819	0.9880886630785404	0.1712289199403528	0.1288298675670845	1.9716133292940223	0.1815018027181476	0.0691766166216752	0.1523838123370868	0.1454946339860141	0.3095684175586574	0.2025346769008037	0.4161595959402857	0.3298823612967716
72	A-1	4	2D	0.43	0.7894736842105263	20.0	1200.0	11.675	12.5696	12.843247719694	21.3471532220139	0.811581489526494	0.741314950472164	0.1810455558803813	0.1965404379698474	1.5045545764946728	0.0663987598757107	0.4855855423466113	0.1416048500205941	0.487604883600563	0.447302882550338	0.0014799868243485	0.0748867195116629	49.99958526632562	8.321046629526209e-09	0.1857894005319885	0.9881421952997844	0.1702089220202381	0.131645995762069	1.9711426228054376	0.1851010248909379	0.0704628428317342	0.1734376917469464	0.1458760508216288	0.3266057158674485	0.2242426165645051	0.4030731532435794	0.3859646592597407
72	A-3	4	2D	0.43	0.7894736842105263	20.0	1200.0	11.675	12.5696	12.7623217322601	21.1414091635784	0.810787235507196	0.744541404968346	0.1818808631190001	0.1969974476097154	1.5047203969431444	0.066360038981191	0.4831125618797231	0.1410330843169077	0.4868077230157238	0.4460409553752101	0.0015322242176347	0.0775304982902716	49.999969245984246	4.172441751891962e-07	0.1915884992161707	0.9881422852831552	0.1690110022582473	0.1301440391485172	1.9712814576686848	0.183683402632148	0.0701556683693071	0.1700329411079305	0.1464252102827711	0.3216037777681054	0.2208125549321118	0.4046719850485044	0.3827721613539694
73	A-2	4	2D	0.44	0.9821428571428572	20.0	1200.0	12.972	12.99873	13.1348756673373	22.9139452666449	0.794119385160319	0.721838924245251	0.2260972002405777	0.2644791735621	1.5084508227957734	0.0653497096673677	0.5697587289036844	0.1426590289840697	0.502836570407559	0.487073714284373	0.0022565589148798	0.1141818810928576	49.99999999997264	6.834575933810269e-20	0.217086376662982	0.988142292490112	0.1926807676903853	0.1473133655184486	1.9741594919466208	0.1716647422476478	0.0694629431392609	0.1645462870231207	0.1532811336831148	0.2800770529294589	0.2152208307279956	0.5259744201734063	0.4523290596813143
73	A-1	4	2D	0.44	0.9821428571428572	20.0	1200.0	12.972	12.99873	13.1095711180218	22.5804456525109	0.792733625679512	0.732366877993018	0.216379091854748	0.2593192460560722	1.5070610409003122	0.0656489682679435	0.5984487217930892	0.1488866716523158	0.5133367784169874	0.4993527974210737	0.001843812785555	0.0932931125624821	49.99793125059436	8.905428916759859e-07	0.1846788720069106	0.9881418076753296	0.191187318145835	0.1525516135709178	1.9737703121059649	0.1786629129164888	0.0708028113018346	0.1979170117055233	0.1558977028029158	0.3019843495761021	0.2480421006220707	0.5051639721894722	0.5149735149541731
73	A-3	4	2D	0.44	0.9821428571428572	20.0	1200.0	12.972	12.99873	13.1368651061318	22.3860014582515	0.792744325055082	0.740256229771606	0.2181011818321309	0.2585375845797654	1.5074604786725831	0.0656352918585638	0.5854020340832349	0.1463617340638243	0.5096120700881515	0.493842609723521	0.0019659226771627	0.0994756874644055	49.99999999998492	2.270266053211515e-12	0.1960798508061304	0.9881422924901152	0.1901147084137895	0.149309061461478	1.9738457427072191	0.1751304990066645	0.0703924169711935	0.1853630195539795	0.1540987681537137	0.2943080791057181	0.2360220877973732	0.5073223335056489	0.4953367030921962
73	B-1	4	2D	0.44	0.9821428571428572	20.0	1200.0	12.972	12.99873	13.178080266053	22.5010489356127	0.793628928146116	0.737958423846998	0.213734413007828	0.2568210714396471	1.5066639480027897	0.0657732366956933	0.6015897104517327	0.1499150408190173	0.5145481660732419	0.5006615030229973	0.0017828082874271	0.0902055312374836	49.99743769065825	7.753344882064003e-06	0.1807292929965727	0.988141692002898	0.18972848635083	0.1520929907315272	1.973625358905705	0.1787541270405207	0.0710637959051899	0.2016349766807798	0.1555438350493945	0.3047225409301854	0.2515296644311381	0.4991195934086579	0.5199748677698773
73	B-3	4	2D	0.44	0.9821428571428572	20.0	1200.0	12.972	12.99873	12.6577280399223	22.402173554759	0.792909306476219	0.712593879049449	0.2152223634385182	0.2569129485968165	1.5065857611839544	0.0657533787451176	0.5937093547911337	0.1485647085102918	0.5142661607367153	0.4973650850671407	0.0018127564654594	0.0917254771102112	49.99999997681133	1.5646840501938605e-11	0.1836081412511424	0.9881422924846844	0.1894207998821238	0.150933524017944	1.973590893365448	0.1783581922600103	0.0708236608393438	0.196815999678333	0.1552520576181076	0.3021256980121424	0.2470030719234877	0.4995719497249717	0.5079949405483191
73	B-2	4	2D	0.44	0.9821428571428572	20.0	1200.0	12.972	12.99873	12.7752759655497	22.7545591059167	0.792958552958671	0.708029540081644	0.218805574333514	0.2601536835898913	1.5074143478769082	0.0656249562091084	0.5889719189391056	0.1473239326827857	0.5102143181603543	0.4953623458698946	0.0019412071620462	0.0982250823920019	49.99999999611772	1.1451842530261455e-10	0.1926393766458559	0.9881422924892088	0.191760149916189	0.1515122236083441	1.97380486257794	0.1775694134870916	0.0704588951013708	0.1901131891822379	0.155424111306806	0.2971463051937898	0.2406151318382672	0.5098909895902374	0.4939629143155533
74	B-2	4	2D	0.68	0.96875	20.0	1200.0	7.19	7.44791	7.81240707362091	16.1916389837954	0.841407364046047	0.573439683395296	0.1917469402046325	0.209233751344713	1.5266204512237391	0.0674941522002734	0.4911973412531041	0.1114170034271381	0.2871686282429567	0.4501452878257797	0.0064386528894475	0.1825086329735953	27.745779172645435	1.7981100116791318e-15	0.2504890030250321	0.9788328274080742	0.3383780955902946	0.3368669788454577	1.9825212074667704	0.2105098940036317	0.0664748580295021	0.3955342359197313	0.1936219724300886	0.4623423687320111	0.3973085220462702	0.728609363163766	0.0609045815116936
74	B-3	4	2D	0.68	0.96875	20.0	1200.0	7.19	7.44791	3.45370480719632	15.1932715442598	0.762173536621442	0.298249723409742	0.1924182526308746	0.2065663215178421	1.5270126484910185	0.067533466219372	0.4735276861395704	0.1088529082887834	0.2814147531801314	0.4410949920093691	0.0066300095338589	0.1918257956115562	28.33295924114672	3.3649779248217243e-19	0.2613330601472016	0.9792624046852864	0.3376259021405453	0.3356359293164134	1.982716674470849	0.2072546990470032	0.0661267787841749	0.3941059829488334	0.1927918201500069	0.457252186672667	0.3964426225258097	0.7340280464458118	0.0604425507303508
74	B-1	4	2D	0.68	0.96875	20.0	1200.0	7.19	7.44791	7.93081880826761	16.2912887367765	0.842757001332576	0.57764393495801	0.1888943386146163	0.2080864196146773	1.5269171275655773	0.067419848871089	0.5016022033313388	0.1126610453908071	0.2873955821167339	0.4553387800191858	0.0064607527552152	0.1803745237273633	27.31849967974104	1.1770821392750302e-16	0.2491216934850745	0.9785088737975632	0.3381971086032768	0.3355808741489361	1.9824196192534465	0.211141828129181	0.0663825984403173	0.3922641726147642	0.1911025962768174	0.4634827243981914	0.3953223178270053	0.7240418174909767	0.0593391878291939
74	A-3	4	2D	0.68	0.96875	20.0	1200.0	7.19	7.44791	7.22867218907341	14.9921267249118	0.843571346363992	0.571575317603946	0.1906605685441644	0.205938597797668	1.526623953951716	0.0676323695091493	0.4801320869341928	0.1097030981418459	0.2824493069612705	0.4445123820892888	0.0065143824061332	0.1861579116874471	27.97644824660273	2.0109278281845148e-19	0.2553196618010199	0.9790036888131703	0.3381260914273644	0.337020513364958	1.9824308935199595	0.2106283156955461	0.0662845813570863	0.3967302787615729	0.1934699176537	0.4622310312377096	0.3980317315678483	0.7291170228500731	0.0619264576495321
74	A-2	4	2D	0.68	0.96875	20.0	1200.0	7.19	7.44791	7.12401334673411	14.9569397353528	0.841638936181936	0.565921458693485	0.2017446115910891	0.2110293589403399	1.5260437879523443	0.0670539148930361	0.4460222817156068	0.1044047258349798	0.2807360118829613	0.4263984520330433	0.0069833456063726	0.2145012148635013	30.116110436773628	1.9466682901759338e-15	0.2853546819608822	0.9804662767691552	0.3331661134130753	0.3261697781564123	1.982123986244548	0.2014912151445435	0.0654879312113115	0.3790004596056004	0.1934444859311172	0.4339093061561566	0.3871300119289876	0.7517003519602535	0.0564635326519234
74	A-1	4	2D	0.68	0.96875	20.0	1200.0	7.19	7.44791	7.14362623167249	15.0401132664457	0.843024445923484	0.563413758238974	0.200163039955144	0.2090579248906094	1.5266830658840045	0.0671341180205306	0.4444381986677397	0.1041457631774373	0.2789475464113132	0.4255284795545149	0.0071161295701271	0.218650924150588	30.12610215930643	3.999915036011975e-20	0.2917475567801943	0.9804726288779108	0.3315194092496316	0.3217436110365469	1.982250493170377	0.2001277054812024	0.0651445696932609	0.3705121391377609	0.1900926079658231	0.4293048968084925	0.3817697112649593	0.7494524600777442	0.0563819200145404
75	A-1	4	2D	0.45	0.6545454545454545	20.0	1200.0	11.101	11.97249	11.9187789816555	20.0960102218755	0.817900817946396	0.725139029425343	0.1574606259506627	0.1627424559100012	1.5073213629959643	0.0669756204404506	0.4335438140643073	0.133016978153135	0.4393185894396045	0.4194730868345481	0.0022984538203207	0.0895789370730982	38.37356400251629	3.0037573051963107	0.2418157699439888	0.9846049491403644	0.1606557318320856	0.1181215152434697	1.9708501915868764	0.1846315672005844	0.06891275698298	0.1352461931886013	0.1401087094910489	0.3188656406164067	0.1839468118863264	0.3704429082265692	0.1694364185831423
75	A-2	4	2D	0.45	0.6545454545454545	20.0	1200.0	11.101	11.97249	12.0339478126047	20.4664481618355	0.819630459724406	0.71737717476688	0.141799959523962	0.2089357201780108	1.5094880579464665	0.0645414218706674	0.8734540184597439	0.1664761972771858	0.4280198915501336	0.5927935364910795	0.003880105940472	0.0117374676255443	2.4250379256697734	2.6360574312015634	0.0240450489551448	0.8016553792901111	0.2604848894587944	0.2674716958870626	1.973691269199308	0.2457564824034526	0.0759678342597018	0.4268223098959199	0.1806941301069248	0.5479350594947215	0.4156729998778301	0.4881448836906178	0.1226181133788472
75	A-3	4	2D	0.45	0.6545454545454545	20.0	1200.0	11.101	11.97249	12.0507173089795	20.1447727576399	0.819475448479417	0.729986081127986	0.1455558746517688	0.1764085070808109	1.5086345516899602	0.064929084596491	0.6119641855943954	0.1474976571888703	0.4155411906673929	0.5049358659837492	0.0007287227991986	0.0012232679584426	1.0786464754332936	6.583005920133092	0.002881483622123	0.6425691717816121	0.2348323591503751	0.2468953501718104	1.9739044589205008	0.2621522045902386	0.0747246466138664	0.4513685212084026	0.2120381584362509	0.581577325710484	0.4293152325785985	0.4245271252110641	0.1094364731005346
75	B-1	4	2D	0.45	0.6545454545454545	20.0	1200.0	11.101	11.97249	12.1653088675408	20.338148614061	0.820160582457414	0.729311111578608	0.1550994333188464	0.1605021141231918	1.507208625335775	0.0670047753619621	0.434833659212918	0.1333899546578557	0.4364339274270931	0.4201966715536169	0.0023543007190175	0.0872629926578203	36.46535531035872	1.2180653787840907	0.2372836695189117	0.9838123769494173	0.1618223997620366	0.1199929982531202	1.9706413790448984	0.1856476252943541	0.0692179071437815	0.1415104363151987	0.1403753130677915	0.3262824030539951	0.1908407884566118	0.3677581050341325	0.1654210582313373
75	B-2	4	2D	0.45	0.6545454545454545	20.0	1200.0	11.101	11.97249	11.2991303275552	20.4884898632039	0.819982211400515	0.672559385783619	0.1398867932641465	0.2021538697217653	1.508804299802714	0.0647849052801723	0.8451247684264283	0.1669211161805784	0.4331214293750213	0.584810935976601	0.0035957161065167	0.0123925416647998	2.8464738866175243	1.640551751344519	0.0265514351361918	0.8259090247775359	0.2490723136024908	0.2521907574796027	1.9731381662317629	0.2436205960917756	0.0760348619456869	0.4125202349149443	0.1784092240238703	0.5403271354887869	0.4074192501936494	0.4667371688661679	0.1106968650981585
75	B-3	4	2D	0.45	0.6545454545454545	20.0	1200.0	11.101	11.97249	12.3670491714251	20.614228203866	0.820705177312834	0.730990671820647	0.138868893831081	0.1970497807106133	1.50929367420993	0.0649990446537564	0.8189627012533341	0.1684307798003784	0.4371963154223845	0.5771559044716008	0.0030274176592964	0.0099824063461298	2.6973337244949587	0.5482128711650371	0.0221480646049861	0.8180347971626986	0.2435150722865135	0.2436801674612481	1.97346709527145	0.2417408584703977	0.0757585013785688	0.4006779669660053	0.1757211566931246	0.5406556199726295	0.4004065045829244	0.4507123545179913	0.0908201772329749
76	B-2	4	2D	0.46	0.8888888888888888	20.0	1200.0	12.612000000000002	12.67429	13.3446533972762	22.7358868614586	0.800622750834748	0.733107177988013	0.2075001408733479	0.2287707150572708	1.5070316324297066	0.0658959040004426	0.5025087216538605	0.1385814060194673	0.4867102436450077	0.4557866180868421	0.0020134510483733	0.101880622953849	49.99999995339334	6.696820648570027e-07	0.2167512690956072	0.9881422924791966	0.1838798496244851	0.139383386025076	1.9729306708226848	0.177013619211936	0.0692246044607048	0.1580133783539704	0.1488835698420695	0.2965384872593851	0.2084572421361444	0.4700347240361958	0.3798316810584425
76	B-3	4	2D	0.46	0.8888888888888888	20.0	1200.0	12.612000000000002	12.67429	13.4900249454006	22.6066944903816	0.80091683442538	0.745054882955184	0.2049477257760864	0.2273285646457534	1.5068527884831728	0.0659442757552339	0.5092026700219111	0.1401477664201471	0.4886533697934291	0.4590709018144109	0.0019263918971136	0.0974145015568462	49.96837173308488	0.0014030382371007	0.2093970220006373	0.9881348760215776	0.1834257826549266	0.1404712937062519	1.9729686889028568	0.1785976006618928	0.0694041374316743	0.1658208768312373	0.1492967532601185	0.3019496082059336	0.2165269736669492	0.4652143599088515	0.383312412769959
76	A-3	4	2D	0.46	0.8888888888888888	20.0	1200.0	12.612000000000002	12.67429	13.1947935635516	22.1834316988155	0.79974984070499	0.743737546656059	0.2061327417974595	0.2278575007686124	1.5067078207159106	0.0659284855383375	0.5053920827022182	0.1389514643592579	0.4875169561946344	0.4572061720097971	0.0019664732429363	0.0995034800780504	49.99996642998845	0.0005316911581604	0.212894609897814	0.9881422846232482	0.1836374906668843	0.1400227642176697	1.972759957346349	0.1780119796867369	0.0693140039739002	0.1624955215254434	0.1498126851604091	0.2995884339075516	0.2131101323721299	0.4673837450643325	0.3821053799522361
76	B-1	4	2D	0.46	0.8888888888888888	20.0	1200.0	12.612000000000002	12.67429	9.47520268628728	22.7935505035504	0.782373530593249	0.531327605226619	0.2063032844632709	0.2287566709489408	1.5069547994832428	0.0659916203513046	0.5088367863075264	0.1398374859414059	0.4884315394468442	0.4588924110300981	0.0019387664136975	0.0980097025492372	49.952610080714216	3.380359259293208e-05	0.2092661590950333	0.9881311766288224	0.1847169771267822	0.1415831340049841	1.9728018566375247	0.1782320760636873	0.0694392616101168	0.1664868503548928	0.1494323241058298	0.3023023014581225	0.2172077058827654	0.4683495075031622	0.3938717131458859
76	A-2	4	2D	0.46	0.8888888888888888	20.0	1200.0	12.612000000000002	12.67429	13.1414774749849	22.5620612410545	0.798797066171048	0.729170281804489	0.2065175951767686	0.2276704245390837	1.507001510826363	0.0658815718094101	0.502426281616389	0.1382827972846588	0.4870380841446295	0.455745921513887	0.0020099218857678	0.101702047396979	49.9999999886188	0.0001462358419666	0.2175634820292953	0.9881422924874514	0.1821672001804808	0.1380867103144064	1.9728738514359003	0.1770237843946122	0.0690594828189788	0.1580218073154659	0.1494058456428761	0.295398433826075	0.2084660438399525	0.4674591822504692	0.3811213052779839
76	A-1	4	2D	0.46	0.8888888888888888	20.0	1200.0	12.612000000000002	12.67429	13.3996024082545	22.6753655462436	0.798778339445187	0.739794904472183	0.2074254674554645	0.2285093061880751	1.5070825560152603	0.0659383647760471	0.5016453716665115	0.1382009463880366	0.4866613653807904	0.455360122747712	0.0020208444187352	0.1021870691745455	49.96651973163716	0.0012964109647078	0.2176300800975466	0.9881344414607872	0.183005469904404	0.1388484096631579	1.9728316051592991	0.1769730291925247	0.0691366360210301	0.1587118009952804	0.1493839412080187	0.2957085545216629	0.2091858869034088	0.4695447850257786	0.3708223883152136
77	A-3	4	2D	0.39	0.9836065573770492	20.0	1200.0	13.341	12.53612	12.1982703731526	21.2351075857587	0.78535394379782	0.73143941699321	0.2159789733915284	0.3176572768615431	1.5033981871074051	0.0647103973622856	0.8707787145820509	0.1720816648923164	0.5512245538025307	0.5920528397295299	0.0033149883920433	0.0495976990978663	14.361650911632369	10.063301204686324	0.0860659318903939	0.9598974736448692	0.2183541890232104	0.2090206537639716	1.9740057766136607	0.1975920602701235	0.0755671318388022	0.3572550666374131	0.1632595556990498	0.3627095143070755	0.3732078095886781	0.5762756297233811	0.0494505687288771
77	A-1	4	2D	0.39	0.9836065573770492	20.0	1200.0	13.341	12.53612	12.2325311704184	21.5411048400206	0.7838776364854	0.724436097132981	0.2199740608711105	0.2791914452628146	1.5044115818866317	0.0646462381658847	0.6692016693113705	0.1617015810538871	0.5673387335207457	0.5272618887071419	0.0010710352957174	0.0541925967547903	49.998329458869314	3.1808634363410406	0.1101235719458422	0.9881419009991678	0.1875040844457353	0.1587231045017776	1.974491748393264	0.2030185746317795	0.073482891849163	0.2465047839942542	0.1576057930085826	0.3225376945334119	0.2912030606975606	0.4921071465193826	0.9373046932050124
77	B-1	4	2D	0.39	0.9836065573770492	20.0	1200.0	13.341	12.53612	12.7634309515349	21.9746141789496	0.788618681744019	0.736510789890577	0.2189370809792905	0.2799864290332257	1.5036256105699322	0.0648152119874027	0.6788442587288808	0.1602660381505382	0.5558825123640845	0.5308263724025507	0.0017192581988604	0.0576187161957245	32.91370738491518	8.984216276706974e-07	0.1143956756356632	0.9820968777608272	0.1922608042056955	0.166074000643953	1.9737027173487425	0.1878843573161189	0.0734136183133231	0.2637954123310243	0.1561439875955318	0.3297218120002523	0.3053910782174105	0.5036791458729033	0.5103425521301057
77	B-2	4	2D	0.39	0.9836065573770492	20.0	1200.0	13.341	12.53612	12.7654894570809	22.2054542478478	0.789244447911704	0.72839385628689	0.2219937544344846	0.2831198434264261	1.5046745381002655	0.0646698709464425	0.6753504896912818	0.1578554088632716	0.5467532288624236	0.5295410909786539	0.001966061963313	0.0631886144210302	31.539686134078394	9.38650734723294e-10	0.1220281084643191	0.9813314916176544	0.1996744515519136	0.1715117002803449	1.9737597804465847	0.1871320682182977	0.0733027149546712	0.2589566614422548	0.1556538956997994	0.3312186626732573	0.3014781455998565	0.5178201581278012	0.4790954034276312
77	B-3	4	2D	0.39	0.9836065573770492	20.0	1200.0	13.341	12.53612	12.6414966913095	21.6482388549353	0.78956926392985	0.739580906068086	0.215555870706478	0.3157961480039617	1.5031980948960155	0.0649492232668868	0.8650315343718036	0.1721287286788297	0.5527404348471789	0.5904525015857245	0.0033669254739146	0.0524838245532966	14.988056510284071	10.092067853295587	0.0918628431328057	0.9615089925030644	0.2146076999741087	0.2030481375189886	1.9744491378416933	0.1928788821661758	0.0759376717393639	0.3461363107823501	0.1610304016486532	0.3553967220200153	0.3658419054820268	0.5713281100762471	0.0484266511162006
77	A-2	4	2D	0.39	0.9836065573770492	20.0	1200.0	13.341	12.53612	12.6155216647289	22.0200593959298	0.787673467415038	0.727345089340028	0.2234693115564664	0.2811159960896916	1.5043434873010193	0.0647717833655785	0.6579624205745092	0.1566746444829912	0.5500296101900932	0.5230382162561096	0.0018902413723978	0.0676531631263328	35.19075355890161	7.853959374748997e-09	0.1323697102267748	0.9832358936222853	0.191664310725694	0.1623233181372154	1.9738256591142893	0.1816089111630381	0.0727859951117212	0.2469146787036898	0.1553896769283437	0.3176006795831319	0.2915461083773209	0.5110924773532398	0.5159248735663701
78	B-3	4	4D	0.38	0.9838709677419356	21.359223300970875	1806.0	13.571	13.86455	13.9939901026651	23.3758303438011	0.799283504074954	0.748985941242504	0.3142879301617344	0.3809136621488347	1.5086801239406311	0.0627545681547906	0.61198947077864	0.136119641596815	0.5045665301548964	0.5049461942812661	0.0061326013232054	0.2557312597616093	41.10029099950353	6.821059933916034	0.3387471944748423	0.9856116111993762	0.1850951139880404	0.1182875585136902	1.9711630398310689	0.1235480031944845	0.0647406805391849	0.0390636466035143	0.1	0.1566862753702612	0.0611263789000191	0.7549324804241343	0.0362863142691051
78	B-1	4	4D	0.38	0.9838709677419356	21.359223300970875	1806.0	13.571	13.86455	13.9347841470917	23.3090681805727	0.798919279282211	0.748294291295356	0.3159651570379621	0.3821076184354693	1.5086759762795412	0.0627483717828867	0.6093346684728292	0.1357988879152638	0.5046883751131793	0.5038594231672102	0.0061791414918815	0.2580064176570976	41.154411676133215	6.713437482307183	0.3407753036416451	0.9856302609493368	0.1836608292620611	0.1170019136254733	1.970999789908468	0.1207564788619509	0.0644193725690498	0.0370542597220125	0.1	0.1545363212451756	0.0581649979676483	0.7571159497180402	0.0377642362088614
78	A-2	4	4D	0.38	0.9838709677419356	21.359223300970875	1806.0	13.571	13.86455	13.6205308829426	23.2670911779306	0.797378100102835	0.734154795382796	0.327421802303371	0.3763236111803857	1.5082940580485285	0.062703530743254	0.5493541619189581	0.1304056828074342	0.5079021199383931	0.477967697095	0.0053926699706899	0.2646031494895088	48.46718766912694	4.616842186889136	0.3571195018738216	0.9877718689718684	0.1666841855177032	0.1000105113108418	1.970181060591472	0.0895479435937493	0.0623168301239216	1.3192493875028969e-12	0.1000008711305025	0.1349783781877854	2.19874897916666e-12	0.7409372719807363	0.1797638701270889
78	A-1	4	4D	0.38	0.9838709677419356	21.359223300970875	1806.0	13.571	13.86455	13.9804046001114	23.4194123706772	0.798090200016601	0.747983070804261	0.3182061648896339	0.365220318874319	1.5082326859514488	0.0627795962825824	0.5477474642925018	0.1310009740357248	0.5125770022259843	0.477236919560651	0.0049248479519398	0.2491926926211615	49.99906316965691	5.775235128097143	0.3497353152586541	0.9881420729473148	0.1635082439482117	0.0981049463689284	1.9703362858546585	0.0947813224689962	0.0627480380989866	8.51395805741533e-15	0.2499997396937845	0.1376876825153614	1.4189930095692012e-14	0.7125179578644091	0.1284204352323649
78	A-3	4	4D	0.38	0.9838709677419356	21.359223300970875	1806.0	13.571	13.86455	13.9495222217961	23.3611912911054	0.797883567461144	0.74838457326534	0.3145927457337842	0.3815007426892999	1.5082308167679614	0.0627779624734408	0.6126813089712336	0.1362002265647478	0.5046151488970713	0.5052286239086144	0.0061765050126895	0.2567345116326283	40.96630830950056	6.808348945733662	0.3395855088020755	0.9855652324105272	0.1841906097122165	0.1177879120914059	1.9710320607046048	0.1233921138954456	0.064474173500137	0.0394892349585051	0.1000000000000134	0.1557993423008532	0.0617512114352754	0.7560231664133343	0.0369510557078867
78	B-2	4	4D	0.38	0.9838709677419356	21.359223300970875	1806.0	13.571	13.86455	13.7080440926487	23.3757848966591	0.798136827992081	0.734737049232188	0.3176305458149054	0.3852076378421548	1.5084172151652813	0.0626375917941268	0.6127537572114645	0.1362138558402841	0.5032455271972219	0.5052581808696227	0.0060332876106715	0.2589996825838867	42.32844951163465	6.693639289493407	0.338364089912595	0.9860232548152622	0.1898463165373744	0.1212393989666414	1.9713306987455468	0.1282144182514155	0.0648219830882793	0.0386186531186846	0.1	0.1583903828901829	0.0604721658693979	0.7654467193926829	0.0398417386243922
79	B-3	4	4D	0.55	0.9777777777777776	21.15384615384616	800.0	3.2070000000000003	12.2828	0.0	0.103324514739773	0.0001009933703228	0.0	0.0158926574312223	0.0150075660229782	1.4619190720713375	0.0851950932667672	0.3443081553809089	0.1	0.6528885221904798	0.3646141923258347	0.0013900242965152	0.002300856969586	1.05526385067822	27.84450518438873	0.1000963850063797	0.6375200245240908	0.0074812970346509	0.0056779912464653	2.0332041847092364	1.2172305908972525	0.0899999999999999	0.1589581352226429	0.1000000000540518	0.2470150928031405	0.209442560591319	0.0229864142390296	0.0077155739923323
79	A-2	4	4D	0.55	0.9777777777777776	21.15384615384616	800.0	3.2070000000000003	12.2828	12.2017556314805	23.5017359121633	0.795327795935978	0.652794099557022	0.2894062589743137	0.5026955732245973	1.5179927160725553	0.0479298389909665	1.1369892932039671	0.1188733228435542	0.2984175998244792	0.6545747274623271	1.3052181759406818e-18	7.8339612554235735e-19	0.0002031997277061	0.0006094749769041	4.650512237387405e-19	0.0003385515568699	1.1285962096300743	1.1818417111723978	1.978831706797584	0.3664247167280259	0.0727731411231773	0.4471785223873611	0.2499999999999981	0.7015824001755209	0.4270317933640216	1.684537284396995	15153.712013397691
79	A-1	4	4D	0.55	0.9777777777777776	21.15384615384616	800.0	3.2070000000000003	12.2828	0.0028544363938016	3.04428016927051	0.0039966552727765	0.234605970888424	0.1434663141267808	0.2222912930417793	1.4962229002336107	0.0720395144518095	0.9494319652301176	0.1541021728070762	0.4823100858886958	0.6127613128783685	0.0066066460415826	0.0780103135153789	11.207854246220744	8.991769389816891e-17	0.1692606151907844	0.9491863646443606	0.1994517251045756	0.1605871443637133	1.9442054468554129	0.5373214473558919	0.0899999999999999	0.2051429200700826	0.1	0.3484292989205197	0.2547906898966786	0.4608887509208717	0.1067023609804118
79	B-2	4	4D	0.55	0.9777777777777776	21.15384615384616	800.0	3.2070000000000003	12.2828	0.0	0.0329839552106055	4.60644039347744e-05	0.0	0.015604628341234	0.0146186816003399	1.4608364395569364	0.0851950932667672	0.336817031502835	0.1	0.6579844526507617	0.3595334202693941	0.0013288870029031	0.0008392016601547	0.0315071622503483	28.357124785209308	0.0377723285940971	0.0498920109442211	0.0075481932087064	0.0067594830335674	2.0265334708199867	0.8805709804944173	0.0899999999999999	0.2955100706445461	0.1210464133842559	0.3042432187551413	0.3299907843938057	0.022217366294062	0.0090193598267909
79	A-3	4	4D	0.55	0.9777777777777776	21.15384615384616	800.0	3.2070000000000003	12.2828	12.3638381024783	23.0987294246592	0.795983668173052	0.672451645887021	0.5307848887160984	0.5312849147518153	1.5156274201712636	0.0647099902384294	0.4009420502473729	0.1055196175646694	0.3733997408140308	0.4005646981743689	0.0135959760191902	0.687956386570189	49.99999999993849	1.5323552143449883e-16	0.4835121971356294	0.988142292490104	0.3393170041752409	0.2035902025070733	1.9764828736760247	0.1115182918223541	0.0557721613829882	5.684033202653609e-12	0.2499999999867289	0.1430880620503397	9.473388670999609e-12	1.4228315038290775	0.0780150406950717
79	B-1	4	4D	0.55	0.9777777777777776	21.15384615384616	800.0	3.2070000000000003	12.2828	0.0	0.14973826277115	0.0001499870178947	0.0	0.0160516233214556	0.0151869137396213	1.4611457320005603	0.0851950932667672	0.3461294621411613	0.1	0.6501313240473969	0.3658373150729759	0.0014071145576253	0.0024607404819435	1.1487847514677352	27.49830692526411	0.1053409860022606	0.6569046021836439	0.0073565396267537	0.0057121089184036	2.0327234627099555	1.1712879028376073	0.0899999999999999	0.1764668183979124	0.1	0.2445276899503424	0.227268975591278	0.0233597631399685	0.0073609425957506
80	B-3	4	4D	0.28	0.9861111111111112	18.96551724137931	800.0	10.23	13.13799	12.8456084671217	22.6700671348342	0.794170100229911	0.713490741830605	0.4153316696645773	0.517571005594502	1.501225826852504	0.060746421915514	0.6461631110685429	0.142519669254681	0.5913147810895748	0.5185220982143178	0.0063512007124342	0.2627278209994036	40.76663804137736	0.0849662855911755	0.3001614122142657	0.9854955580533318	0.1583160598427784	0.0949896359079275	1.9643042253990264	0.0415547662827219	0.0686447001490427	1.4278000263537171e-11	0.2499999999993052	0.1085238066961594	2.3796667105329007e-11	0.8752884625018331	0.0725980153232927
80	B-2	4	4D	0.28	0.9861111111111112	18.96551724137931	800.0	10.23	13.13799	12.9135295686399	22.7596931683551	0.794111999732806	0.71449106111566	0.3924437838427791	0.4953610902131575	1.5016703977625243	0.0606561465777225	0.6622472583528276	0.1433791853710867	0.591646879701618	0.5246573157283215	0.0062148573718937	0.2506677622484573	39.733630725313866	2.8394933135981435	0.2993912971894286	0.9851240766276111	0.1520485989719785	0.0912291593831872	1.9645175771298744	0.0450422995211635	0.0684875108787367	7.824593224847637e-16	0.25	0.1089618231089533	1.3040988708079374e-15	0.8372580118448021	0.0617049240194966
80	A-1	4	4D	0.28	0.9861111111111112	18.96551724137931	800.0	10.23	13.13799	13.4217017669984	22.9928295412568	0.794649901168313	0.734580391096143	0.3741732676859459	0.4822219618821588	1.5020200392999692	0.0604620646379738	0.6887664713848589	0.1455602818599839	0.5887885112568906	0.5344385400131778	0.0056831677102005	0.2230070809829898	38.63992610366213	3.1684227962931946	0.272289562879358	0.9847094513273305	0.1757597825610465	0.1137780414489737	1.9661462160754388	0.1036965366387308	0.0704613857807032	0.0473496939463686	0.1	0.1389219258637515	0.0731439195679784	0.8190070843141224	0.0803516286701967
80	A-3	4	4D	0.28	0.9861111111111112	18.96551724137931	800.0	10.23	13.13799	13.3263275377416	22.6592737756808	0.797080061582706	0.737840603514509	0.3786869566934397	0.481110559731404	1.5018488778503831	0.0606602636933176	0.6704703746130869	0.1438499849046215	0.5920764119693784	0.5277339700402491	0.0060767791543458	0.2423253758354465	39.27727210098525	4.675859383624064	0.2982165661337428	0.9849538353957472	0.1485765622033779	0.0891459373220268	1.9646004500354848	0.0475632300694031	0.0685456399438724	2.823186875346344e-16	0.1000000293426348	0.1097070218968787	4.705311458910571e-16	0.8125818728888773	0.0488845898195519
80	A-2	4	4D	0.28	0.9861111111111112	18.96551724137931	800.0	10.23	13.13799	13.2012301244455	22.922511771848	0.794894592724382	0.724507114706274	0.3741263529937841	0.4769821665632065	1.5019462371068435	0.0606977318806391	0.6749226638176207	0.1442033423398605	0.5916700383728566	0.5293832190547436	0.0060726594709807	0.2407842965295369	39.05055140670529	5.0968313184250205	0.298679623587843	0.9848678018662173	0.1473266415692503	0.0883959849415502	1.964721226915092	0.0493651700640481	0.0682013698827426	3.586279295287541e-28	0.1647004863790138	0.1096503380393003	5.9771321588125665e-28	0.8061624480342936	0.0445249530480317
80	B-1	4	4D	0.28	0.9861111111111112	18.96551724137931	800.0	10.23	13.13799	13.1195253823692	22.9039689178169	0.79423175922402	0.721207325116696	0.3113158070352591	0.4553520623734161	1.501146760386681	0.054854493124393	0.862669264082192	0.137329179280624	0.516434265792413	0.5897910657359078	4.2930670162247214e-16	2.060197404356913e-14	47.38894115956826	49.99672133732861	2.3365580653371224e-14	0.9874971194299756	0.4873292259936527	0.4263711162284463	1.9609403195276784	0.3264867073120687	0.0871173642215689	0.2749139051922973	0.1737778002266385	0.4835657342075636	0.3142182374297435	0.8817231786018831	0.0604388553584581
81	B-3	4	4D	0.41	0.9830508474576272	22.0	2640.0	13.202	13.61943	13.6310823706784	23.1011593473264	0.794994028741192	0.742220080291085	0.2739566520937956	0.3453352828027632	1.5077835476252388	0.063868151390677	0.6605471711069435	0.1436338219080673	0.51096064863774	0.5240162258480872	0.0050990335205517	0.2068245649888584	39.96152291512647	11.414887963142233	0.3060191620827918	0.9852076560030676	0.1867438784071561	0.1236951005756417	1.9723685942293043	0.1656025217539241	0.0668727446461989	0.0623783420945688	0.1	0.1830201892794682	0.0941732815377332	0.6758549483672635	0.1077572711045913
81	A-3	4	4D	0.41	0.9830508474576272	22.0	2640.0	13.202	13.61943	13.5988336907076	22.9221034688131	0.795595451181785	0.745684133858977	0.2742517178520203	0.3445272599507263	1.5076208287171384	0.0638724874254768	0.6562446742325421	0.1432538734658913	0.5121836494018751	0.5223860348967859	0.0050077177440895	0.2053569305973843	40.40808813351335	11.053741377652129	0.3052892306936136	0.985368739989864	0.1856715873223143	0.1227793362026224	1.9722257796553693	0.1654263362416007	0.0667728302935557	0.0612715384906207	0.1	0.1825271199045112	0.0926571535658038	0.6726635267507329	0.1343264614027305
81	B-1	4	4D	0.41	0.9830508474576272	22.0	2640.0	13.202	13.61943	13.6976044631653	23.258158732334	0.793418617119361	0.742278539077925	0.2695238191423313	0.3400294138449575	1.5077121793947177	0.0638017082195584	0.6615931865576357	0.1444479169328795	0.5147077249482771	0.5244108747629249	0.0047319931816417	0.1955523472612443	40.72557671889902	11.308870481766768	0.296010579287781	0.985481146359281	0.1877991988347633	0.1250444493885542	1.9728118002179065	0.1725408743298134	0.0674149793618471	0.0658412291661352	0.1	0.1892816957639418	0.0988842779360349	0.6606262104947561	0.1359555130293465
81	B-2	4	4D	0.41	0.9830508474576272	22.0	2640.0	13.202	13.61943	13.5016490451604	23.2298064425118	0.793606230447823	0.732379458891107	0.2793486173610427	0.3495102665193378	1.5081079793241647	0.0635677403644332	0.6511616124006624	0.1419594829389495	0.5083687484141252	0.5204456450284213	0.0052934566851828	0.2156409158078252	40.13725896566548	10.649314015951072	0.3136534544974072	0.9852714685466272	0.1859678153732028	0.1223620993402248	1.972294583912244	0.1573262460272605	0.0663188033810635	0.0579746021894539	0.1	0.1779777970884676	0.0881106991007549	0.6875132816673879	0.0284784088096949
81	A-2	4	4D	0.41	0.9830508474576272	22.0	2640.0	13.202	13.61943	13.647301894041	23.4490354540103	0.794088498691019	0.732913817728066	0.2868506633852517	0.355162266420336	1.5082760857447957	0.0634467645300773	0.6381434375256756	0.1400186489003315	0.5058599780620423	0.5154034808769418	0.005557492704349	0.2272485502532917	40.290481075298	9.86349752450411	0.3236716214377071	0.9853266583267846	0.1837880435782189	0.1196851818692267	1.9718529025132143	0.1473032682219748	0.0655647260279501	0.0512131014566763	0.1	0.1704684005002507	0.0786426153621901	0.7020959985428544	0.0297891476396193
81	A-1	4	4D	0.41	0.9830508474576272	22.0	2640.0	13.202	13.61943	13.6401368100058	23.6091471495165	0.792872192727752	0.728677300160482	0.2193473939319192	0.3419040588300815	1.5071567638938548	0.0569184572749001	0.9587331707082012	0.1449497223234206	0.4551300226049968	0.6150720269028512	1.7453007771581783e-16	8.830589995749844e-15	49.99637921051311	49.9995280460499	1.1754954410700543e-14	0.9881414439261824	0.4848301231708258	0.4093187606911278	1.9737898464547847	0.3329319234123621	0.0831112026733531	0.2442519165561581	0.157888495858734	0.5448699773949913	0.2893116518497247	0.7512228195212183	0.0209677167159036
82	A-2	4	4D	1.0		22.0	800.0	0.0	0.0	0.0	0.0284404825467526	4.17478114178868e-05	0.0	0.0136354878790115	0.0362085564240034	1.4685281815896951	0.0851950159532235	2.055464677559321	0.2003637180206729	0.5632854137933438	0.774050845010121	0.0022486042474768	0.0119560148632024	4.717082753276049	27.76867297340079	0.1859960585193013	0.8871561666723509	0.0110059495679847	0.0161164406782264	2.0156196688250723	0.7602290901988012	0.0898104345042019	0.8643389540060838	0.1796389956949183	0.250718527687355	0.5902588001510563	0.0642810119654322	0.0597982080280161
82	B-3	4	4D	1.0		22.0	800.0	0.0	0.0	0.0	0.0424982509777383	4.9110623170611e-05	0.0	0.015595877426757	0.014731773668257	1.4609854027678857	0.0851950932667672	0.3445940914476846	0.1	0.6581046057902703	0.3648065286112047	0.0013859709913499	0.0018259870305218	0.7174785344845173	26.9747501711909	0.0815713370270558	0.5445846104545765	0.0075491817626972	0.0058273943945618	2.026945126626892	1.1034950894197824	0.0899999999999999	0.1719239750401442	0.1	0.2603240571826737	0.222721382673991	0.0223851550933406	0.0052650474831487
82	A-3	4	4D	1.0		22.0	800.0	0.0	0.0	0.0	0.0457785279694107	5.2577350789759e-05	0.0	0.0153440339815893	0.0144245470075607	1.4612271327297368	0.0851950932667672	0.3400752777834141	0.1	0.6496501414077028	0.3617532402142	0.001353741518637	0.0008122449111822	6.345779658710143e-18	27.377743702264	0.0365817395257281	1.0576299431183569e-17	0.0078715500233812	0.006966769795728	2.019771300530213	0.8877602313254641	0.0899999999999999	0.2850569170029206	0.1202513415738812	0.3137681190665691	0.3220774975333931	0.022203561714471	0.0074694733494291
82	A-1	4	4D	1.0		22.0	800.0	0.0	0.0	0.0	0.157733526813955	0.0001607007839455	0.0	0.0159116877778495	0.015061936974097	1.4600522223872523	0.0851950932667672	0.3465958095950395	0.1	0.6374457303340724	0.3661497400282341	0.0013936583467684	0.0031345985204222	1.6491872040881344	27.508805513604432	0.1326613201602811	0.7332369671544294	0.0070779844701448	0.0054320437826583	2.0398773101648766	1.2798328525989469	0.0899999999999999	0.1674563013765931	0.1	0.2298929495056464	0.218196529334928	0.0236285792771776	0.0096124052345375
82	B-1	4	4D	1.0		22.0	800.0	0.0	0.0	0.0	0.159340209596706	0.0001621953133317	0.0	0.0154026503617416	0.014512772935362	1.4614996929411384	0.0851950932667672	0.3422256945733266	0.1	0.6534458749751849	0.3632098939185676	0.0013775191552513	0.0017709125528615	0.6855810724014741	26.95945869809268	0.0797363472689293	0.5332849768243739	0.0077335154265078	0.0059259167009603	2.03177725195205	1.1101195081345656	0.0899999999999999	0.1662642891547513	0.1	0.2668177777558856	0.2169803441292477	0.0222096021891839	0.0069348569932024
82	B-2	4	4D	1.0		22.0	800.0	0.0	0.0	0.0	0.0374859014218369	5.53242827990691e-05	0.0	0.0153800319080125	0.014459152696222	1.4620953898267577	0.0851950932667672	0.3401250129194619	0.1	0.6584410745807742	0.3617870051805542	0.0013745035170836	0.0014285636656275	0.4393306731281076	26.92128374816384	0.0650539499004407	0.4227053857708632	0.0078939773479044	0.0060719596887796	2.0266610470704896	1.060860091810432	0.0899999999999999	0.1691888918824396	0.1	0.276504975518785	0.2199575340569244	0.0219596760506292	0.0059097420767842
83	A-1	4	4D	0.55	0.9777777777777776	20.0	3500.0	5.992000000000001	6.704	6.85496601522043	12.4682606148831	0.783613326234704	0.70161299059946	0.1904907020929917	0.2795592576955485	1.488410660557284	0.0653942689044401	0.8675742943037518	0.2055239048616264	0.6771218397626981	0.5911620949420808	7.217982747638628e-10	2.167277866294326e-09	2.4026088203152804	7.358599076898207	5.249374276491925e-09	0.8001737702425723	0.1731927958572028	0.1333047791903548	1.979954564988536	0.4130776556549191	0.0814049499621638	0.1696900932315014	0.107763523058323	0.3228781549879276	0.2204654765908015	0.4128640390531812	1079.8473871304736
83	A-2	4	4D	0.55	0.9777777777777776	20.0	3500.0	5.992000000000001	6.704	6.91007299332717	12.5556713585022	0.78374770458578	0.702209035704886	0.1905129272706801	0.2806652931500226	1.4885715993454172	0.0653635308231234	0.8732086539789209	0.2058179715138925	0.6764445418926076	0.5927257158179952	4.002329946789772e-12	1.8508797771840155e-11	4.024505729890129	36.63305919045977	4.4608918649100586e-11	0.8702564046743533	0.174351280713164	0.1342472026360116	1.980084122696996	0.4128815408494366	0.0812910038264511	0.1699811672554896	0.1079825753673964	0.3235554580627834	0.2207601620457396	0.4149124958045431	7229.256060279519
83	A-3	4	4D	0.55	0.9777777777777776	20.0	3500.0	5.992000000000001	6.704	5.94392188585701	12.1013874373417	0.778284324972143	0.631102127488008	0.1967554514187181	0.2859067741619172	1.4877137497451758	0.0660446570795187	0.8531072562430548	0.1966049232038364	0.6647693473938062	0.5870917322708347	0.0014507581877573	0.0391918340834992	26.4147254133954	24.6290648622291	0.0911259624513104	0.9777898908532868	0.1377361957029364	0.1049855634794078	1.9761461734688708	0.3707552896176752	0.0777198459962226	0.1622220357082912	0.1	0.2441046901548833	0.2128277957190613	0.4300841717248243	0.0223086706899092
83	B-1	4	4D	0.55	0.9777777777777776	20.0	3500.0	5.992000000000001	6.704	6.86866607290165	12.4823211768486	0.783163697053568	0.702626462588782	0.196143363651931	0.2836309091555035	1.4878981777699931	0.0660788842734704	0.8460387742652599	0.195703655353935	0.6632874276306466	0.5850733668570794	0.001464471349731	0.04033363738544	26.94143151578055	24.71034073563672	0.0943225640253062	0.9782146400176688	0.135995040008925	0.1036493314556164	1.9758514411747603	0.3668308507290664	0.0776569815427602	0.1621552333733217	0.1	0.242390008344047	0.212758800665342	0.42761387799656	0.0228068098108211
83	B-2	4	4D	0.55	0.9777777777777776	20.0	3500.0	5.992000000000001	6.704	6.97205929108767	12.7011802469968	0.7832326837996	0.70085179573398	0.1975887313928573	0.2867007677666515	1.4879811163596182	0.066139478890343	0.8509975631991715	0.1963135210322056	0.663836177501393	0.5864913799874929	0.0014738292579508	0.040424940517325	26.82850998461579	24.16204829072084	0.0936012072719106	0.9781249509967356	0.1375181037959888	0.1047591113198027	1.9760777397862308	0.3673944486804833	0.0776011940444154	0.1617841464365682	0.1	0.2425626152266965	0.2123753128669757	0.4318848196037793	0.0223470138642971
83	B-3	4	4D	0.55	0.9777777777777776	20.0	3500.0	5.992000000000001	6.704	6.6742853496819	12.0574651991905	0.78284991813995	0.707082750704254	0.1984958271606582	0.2888780733641243	1.487914370184902	0.0660473528493183	0.8553357493521142	0.1969819460039091	0.6654701766551879	0.5877240009619034	0.0014491901312128	0.0391304659907849	26.40160948379879	23.72430452716668	0.090142383643858	0.9777791023768414	0.1392819554367587	0.1060876583381181	1.9764390417877773	0.3706083085008788	0.0777815401494683	0.1616755379794149	0.1	0.2443874397009541	0.2122630042817317	0.4340961976930273	0.0227464411008238
84	B-1	4	4D	0.48	0.7115384615384616	22.0	3500.0	2.829	2.68589	1.95933492129455	6.14824757516058	0.757154680722463	0.420893986004717	0.1597736309852357	0.2603001611793748	1.4845533201580037	0.0652288575628795	1.029180982958499	0.2231633862261513	0.7108992250762398	0.6317167912735917	0.0024237272560976	0.0091685018054038	3.182810867987535	7.328747549426112	0.0250398647432269	0.8413877878279435	0.1236606450092366	0.0966875403103636	1.9840617691960816	0.5287334193288721	0.0851309402321852	0.1818780203122968	0.1	0.2640609101805333	0.2326168732044051	0.3661562032951423	0.0213890297175928
84	B-2	4	4D	0.48	0.7115384615384616	22.0	3500.0	2.829	2.68589	2.49997297180375	6.14562359274235	0.780969111550294	0.520877381449019	0.1590870782116995	0.2592089781546056	1.484676376557377	0.0651958282377012	1.0293528114814727	0.222865545363476	0.7104047014735954	0.6317556297371494	0.0024227562366433	0.0096539824769917	3.3847106080993723	7.63188397982267	0.0264583217310784	0.8494244478431049	0.1226852704475104	0.0960121276341859	1.9840348190703967	0.5277113565585111	0.085030845289077	0.182588873822989	0.1	0.2631369767953261	0.2333139147903196	0.3648750882657833	0.020918082809502
84	B-3	4	4D	0.48	0.7115384615384616	22.0	3500.0	2.829	2.68589	2.50954462309269	6.07398796384101	0.783011713822154	0.52765825429062	0.1593865373178286	0.2585319350355062	1.4846039578353338	0.0652991174894061	1.0220437396163158	0.2220608758288329	0.7096969395382384	0.6300962881913861	0.0024194324020201	0.0100673450266883	3.561035876961248	7.721454953649343	0.027635904839899	0.8558051365713837	0.1222929879140841	0.0956856993879339	1.984003297859616	0.5254856686936848	0.0850224613621376	0.1824299742774872	0.1	0.2626671556218626	0.2331582125875828	0.3642849794501285	0.0206508149295153
84	A-3	4	4D	0.48	0.7115384615384616	22.0	3500.0	2.829	2.68589	2.36865544334357	6.41630971206174	0.774141729123923	0.476865708648907	0.1618384578649683	0.2646784791440093	1.484798754393343	0.0652819167621094	1.0354485987801898	0.2229271305846499	0.7090018300393401	0.633128182415813	0.002473543282422	0.0093388104056565	3.1754788735745065	7.226322192563359	0.0250161391640699	0.8410797623052415	0.1273042531534786	0.0992941293070713	1.9839308091684364	0.5254064919071175	0.0850232507695076	0.1799749564326166	0.1000000000006322	0.2659820307965898	0.2307445321780213	0.3733114188567371	0.0206335020922899
84	A-1	4	4D	0.48	0.7115384615384616	22.0	3500.0	2.829	2.68589	2.85289525176718	6.32967222401806	0.787409730939135	0.572405538861463	0.1598556401077352	0.2607159365713648	1.48457550227235	0.0651542019649351	1.03094612361287	0.2226989621995867	0.7105133729455614	0.632115376888796	0.0024159745934064	0.0092582797928854	3.232109749064716	7.707321786929952	0.025231029947094	0.8434282838203058	0.1241006829686023	0.0969660081251493	1.9839783052792928	0.527990681744373	0.0850970518877997	0.1813495123929492	0.1000000000307098	0.2642555971073446	0.2320978122038509	0.3669402244893997	0.0215407281730655
84	A-2	4	4D	0.48	0.7115384615384616	22.0	3500.0	2.829	2.68589	3.92493554887915	8.06719486059204	0.794256166584771	0.61256106187373	0.1612472774397917	0.2637670611296272	1.48515243721703	0.0651627663587309	1.035792339055867	0.2224026118946505	0.7082676396771052	0.6332052757098111	0.0024208956800242	0.0098676503270593	3.476032853658741	7.66214069851747	0.0264966268963761	0.852798046153768	0.1264642906676164	0.0987768549532611	1.9834947432044885	0.5221263498926293	0.0849200342266694	0.1810651879025232	0.1	0.2652357334265187	0.2318182793279477	0.3724115664099477	0.0210941971804292
85	A-2	5	2D	0.49	0.9803921568627452	20.0	1200.0	13.81	13.82096	13.8104592664378	23.5188319884337	0.798060139312246	0.735794863870073	0.2563607521351012	0.3320988256742232	1.510921027335647	0.0631713341875222	0.6954355255566118	0.1425275088603069	0.4775295824450021	0.5368353050668445	0.0056676217883776	0.1500849975340333	25.88112438303608	7.2242039585645985	0.2158093334361615	0.9773423518079782	0.2425160680733049	0.2132680145058428	1.9741679790951625	0.1713908740162494	0.0702798632788802	0.279397460960725	0.1754433159251353	0.3066610841188364	0.3177146550497071	0.6954518377140992	0.2234796470281913
85	A-1	5	2D	0.49	0.9803921568627452	20.0	1200.0	13.81	13.82096	13.4220772237568	23.3915256713997	0.796289926149558	0.720592873700465	0.2322831141684957	0.3260827403761059	1.5103213492582783	0.0631362794938492	0.803815949098947	0.1544661471083131	0.4890041638372072	0.5725935437725181	0.0045087913761991	0.0821041945289511	17.609801181389575	7.1932515767630205	0.1231260904727699	0.9670507110965496	0.26643119077852	0.2586432569226367	1.9754993714632527	0.1994761460307063	0.0733751128244908	0.3707694364420071	0.1791172095779009	0.3878697456900228	0.3819335699328607	0.6668301918276938	0.062688859936092
85	A-3	5	2D	0.49	0.9803921568627452	20.0	1200.0	13.81	13.82096	13.998057166506	23.4273635499223	0.798227484937734	0.748544576714402	0.2530509665819192	0.2805347824795224	1.5096257024380892	0.064078991250592	0.5086098040597922	0.1296022912299226	0.4928513438079234	0.4587816219893007	0.0036991202113334	0.16697629441055	44.5394615127576	2.629655884590681	0.2933486192226951	0.9867078609293904	0.1786703823301359	0.1216966284435949	1.9731504197082297	0.1469376553508868	0.0662279539733411	0.0811236806933758	0.1444651998406022	0.2138000369693815	0.1191027165738723	0.5692077053336674	0.3003099017055693
85	B-2	5	2D	0.49	0.9803921568627452	20.0	1200.0	13.81	13.82096	13.802995603896	23.4901629150319	0.798563985536366	0.735830187462054	0.2584098805825559	0.2938810209001979	1.5100958960367812	0.0642181686741769	0.5372669660992698	0.1321508120391008	0.4979245585640979	0.4724193897428064	0.0035160108419646	0.174667682672629	49.0777997917174	10.476117339396517	0.2959406106722293	0.9879221704158476	0.1763636256612163	0.1216632388701898	1.973112090296725	0.1468912865252742	0.0660630003455093	0.0898431488582426	0.181051474152236	0.2061348307636728	0.1302370676681239	0.5902119424430168	0.3024268653979449
85	B-1	5	2D	0.49	0.9803921568627452	20.0	1200.0	13.81	13.82096	13.8874233104081	23.2963780656802	0.797902371331353	0.747108215747923	0.2331674250658239	0.311606869552071	1.5110086707131205	0.062411904248078	0.7364082459807727	0.148204314978977	0.4619968171483845	0.5510353952061499	0.001164944662426	0.0041767941773937	2.985401360348935	8.582250231744558	0.0061926286112166	0.8326547184827288	0.3090705040389799	0.3586947265664341	1.9777736961632213	0.2537053698893495	0.0756185083561609	0.560559554790759	0.2281936972148789	0.5318105542403989	0.4830080046101762	0.6744783902958988	0.3597503659437383
85	B-3	5	2D	0.49	0.9803921568627452	20.0	1200.0	13.81	13.82096	14.0047452017804	23.4360321666384	0.798860039076554	0.748032434464337	0.2379524012440179	0.3328865225115555	1.5116038460865782	0.062535665144622	0.7989626529138639	0.1527064232856566	0.4805920008623379	0.5711107807272231	0.0044496375237362	0.0743408989569494	16.10718087942746	4.55737530006604	0.1073267884384986	0.9640872984897878	0.2872464141604153	0.2854318860402532	1.9762941765385984	0.2052826300000588	0.0739151235424055	0.3936830260337075	0.1822227955751391	0.4120812106991633	0.3961857209185669	0.6926593075087583	0.0741956848161893
86	A-2	5	2D	0.43	0.8245614035087719	20.0	1200.0	12.165	11.31593	11.2190758300159	19.7703395778866	0.828257758009425	0.685137032179101	0.2235030385617678	0.2283328282179379	1.5163237967403922	0.0659488684825416	0.4216095033304673	0.1066040068037243	0.3257350156427389	0.4126914461504244	0.0090284614339199	0.2477978657194328	26.84630051676984	2.358040235272949	0.3535034462469625	0.9781391302761042	0.2579287458860157	0.2248465337254048	1.9745418815753253	0.1691208145119124	0.0634851885961442	0.2717389484953699	0.1850370028322572	0.3207615381102986	0.3117205546045568	0.7009772276627754	0.0402358318663468
86	A-1	5	2D	0.43	0.8245614035087719	20.0	1200.0	12.165	11.31593	11.3908387926051	19.8299862220729	0.828660297885916	0.693197138644031	0.2214393500014625	0.2262155458912609	1.5161968693250951	0.066047174915159	0.4215688670047434	0.1065677936788044	0.3264252084396988	0.4126680839841862	0.0090279353386186	0.2481156266968193	26.883097451469173	2.652154596973596	0.3580266548108379	0.978168399647838	0.2534785469964811	0.218677639361718	1.974470555106992	0.1682703997623311	0.0632933825309043	0.2627066943253142	0.1836504192817935	0.3155481367494633	0.3045144961240457	0.6930088119497982	0.041086280220448
86	A-3	5	2D	0.43	0.8245614035087719	20.0	1200.0	12.165	11.31593	11.3000203228251	19.6161371269484	0.829646539985787	0.69434071040234	0.2219991165379435	0.2269964419286015	1.5165202100578787	0.0660330778205922	0.4225105643148085	0.1067027937680702	0.3237283117640183	0.4132089966209159	0.0089615499906973	0.2459373861207781	26.84362151369756	2.292575755882611	0.3507407170442671	0.9781369962524612	0.2601046922374725	0.22826045641614	1.9746258083060109	0.1707059708374557	0.0634838387428517	0.2775714672911051	0.1848407065653853	0.3255309711917146	0.3162950000504404	0.7011942844655197	0.0419005418560442
86	B-3	5	2D	0.43	0.8245614035087719	20.0	1200.0	12.165	11.31593	11.2548649601908	19.5900866583726	0.829397478609715	0.692693672683213	0.2194553405551339	0.2246844864622649	1.5166234844498228	0.0659946617756154	0.4238278361962088	0.1067754375859769	0.3232102981169659	0.4139639705156301	0.0089384946711154	0.2428397664248073	26.56785939466268	2.412826511990467	0.349326802827565	0.977915080047938	0.2596415243255476	0.2276407457880452	1.974822230637388	0.1712426546548087	0.0636027155245047	0.2767501514997317	0.1842356369718243	0.3274628990554689	0.3156545237275803	0.6951649986751174	0.0409456945236798
86	B-2	5	2D	0.43	0.8245614035087719	20.0	1200.0	12.165	11.31593	11.2148657907968	19.7151133516688	0.827271719035473	0.687617030436139	0.2238986481275556	0.2285504314649802	1.5162170347756294	0.0659676617671891	0.4207762904167897	0.1065287795624344	0.3273651181329346	0.4122120530885215	0.0091195121057248	0.2509694330712415	26.9200504327082	2.470721706256095	0.3594770641144529	0.9781977143731216	0.2531798906288164	0.2186315841229226	1.9744501583859964	0.1671565629736063	0.0631783835832277	0.2635424542601428	0.1845196150258	0.3131578177526124	0.3051876059596144	0.6981514486591444	0.0397557962810221
86	B-1	5	2D	0.43	0.8245614035087719	20.0	1200.0	12.165	11.31593	11.515927588651	19.9424012436799	0.827577524661742	0.697770794233038	0.2142528180418076	0.2215936681355926	1.5159530800049286	0.0663386162047298	0.4342625602821829	0.1085184557602103	0.3317870911748594	0.4198765158469054	0.0089626879190436	0.2425876823394568	26.466398443263067	3.56459370834096	0.3632209446932804	0.9778322926392394	0.2410135408819821	0.2036977624552592	1.974534630377745	0.1659915678523137	0.0632678721503549	0.2451714443505255	0.1801617967295735	0.3049919641318601	0.2900848650168584	0.6678791129303088	0.039122715109992
87	A-1	5	2D	0.43	0.9824561403508772	20.0	1200.0	12.558	13.16922	13.1093195350161	22.2845198459333	0.794701582469117	0.740240411468378	0.2019265186760038	0.2391157390193365	1.5067747192834993	0.0660526584800411	0.5841720472733141	0.1504376565099983	0.5077062059118717	0.4933168694687856	0.001558964148238	0.0788835859008436	49.99999999999999	0.0957688560410947	0.1674907986847401	0.9881422924901186	0.1866339198177576	0.1529733286243434	1.973439700463668	0.1847623971755178	0.0712214172471655	0.2196437645081736	0.1583086728724499	0.3248029954033882	0.2679746665796581	0.4709726535445237	0.4341981515413969
87	A-2	5	2D	0.43	0.9824561403508772	20.0	1200.0	12.558	13.16922	13.25467040814	22.7762504754254	0.795575688631219	0.731484620351607	0.2088806628956586	0.2419422067085832	1.5079038107224103	0.0658742035960432	0.5582795810516917	0.1447100572057734	0.4974068697350145	0.4819903503304327	0.0018693261540375	0.0945877969251633	49.99994304410783	1.0450556070798128e-11	0.1944622256022748	0.9881422791429432	0.1893737994510495	0.1498770434532267	1.9738972766187133	0.1794932546823575	0.0703878817861122	0.1914349497537957	0.1559184727623707	0.3081309046627106	0.2418833661734909	0.4864070470869733	0.4423273701070865
87	A-3	5	2D	0.43	0.9824561403508772	20.0	1200.0	12.558	13.16922	13.1247890858619	22.0527485267745	0.79632294950617	0.747378113999703	0.2026907893903912	0.2385053493047194	1.507137270770856	0.0660627296991355	0.5766955470549172	0.1486829063466291	0.5030803613765685	0.4900975010046522	0.0016653233515187	0.0842653615866617	49.9999999998889	0.4640549197897962	0.1777412904244079	0.9881422924900926	0.1869150991642792	0.1513192509033947	1.9735343822176752	0.1827670389477472	0.0709107824602458	0.2095614082541327	0.1574041543799116	0.3191783481990235	0.2588579521176341	0.4740899617947759	0.4262498439634019
87	B-1	5	2D	0.43	0.9824561403508772	20.0	1200.0	12.558	13.16922	13.2451299823017	22.3961368565586	0.795019738074293	0.743883971204403	0.2020775461172237	0.2383763879125247	1.5069564023811768	0.0660950075401276	0.579628278810572	0.1490347216905677	0.5033787698698031	0.4913651946314949	0.0016086075838448	0.0813955437420671	49.99999999970078	1.8094975311434078e-09	0.1718827482896544	0.9881422924900484	0.1882378169559682	0.1537807928160484	1.9735170509428983	0.1843852044078394	0.0711300851270018	0.2169495126052177	0.1588273414190765	0.3247384818405424	0.2655604896725807	0.4735527244706402	0.4254541128899942
87	B-2	5	2D	0.43	0.9824561403508772	20.0	1200.0	12.558	13.16922	13.1744349469716	22.5918522586729	0.795390292399334	0.733161872730456	0.2073679751930681	0.2401878480084705	1.5079203815026585	0.0658594811677697	0.5582687624974185	0.14467031089361	0.4953916914941851	0.4819855119753889	0.0018801440530234	0.0951352234403995	49.99996508640636	1.559298702923923e-09	0.1962180836857105	0.98814228430839	0.1890756244051566	0.1495212489797252	1.9738778410786773	0.1793554217750035	0.070227169408996	0.1908012968362692	0.1555258035358177	0.3083902248201044	0.2412759028084568	0.4848443204285953	0.4264607294324641
87	B-3	5	2D	0.43	0.9824561403508772	20.0	1200.0	12.558	13.16922	13.1069461758381	22.2136623347454	0.795797014208511	0.741445177279631	0.2040476561054009	0.2389389536793946	1.5072450401702648	0.0660644040845188	0.5709958263670064	0.1479667746377475	0.5012449484718211	0.4876155947869693	0.0017110782361425	0.0865805587488021	49.99999999999362	6.167153822663839e-12	0.181628265464558	0.9881422924901172	0.1876448499481323	0.1511714834768268	1.9736168466461868	0.1822175375284446	0.0707145753659914	0.2056255395158078	0.1568661997526518	0.317126786063621	0.2552371162902701	0.4766909959050236	0.4142122802225033
88	A-2	5	2D	0.47	0.7358490566037735	20.0	1200.0	11.823	12.22971	12.6751553060618	21.1310476986675	0.822589034064572	0.729204505562445	0.1537400214587122	0.1740826646247287	1.511572494424163	0.0649721436327389	0.5323184618617973	0.1382239421257071	0.3872569578243867	0.4701137354826316	5.119368156958427e-13	2.5904002838959408e-11	49.99999993114338	49.99999997071861	5.7624952814886446e-11	0.9881422924739826	0.2496985095961973	0.2754448676698369	1.9763637731306	0.265643150727795	0.0733817039751135	0.5031097787298591	0.2272094169261725	0.6127430421179884	0.4560831464200679	0.4495275323204697	25924.905956272567
88	B-3	5	2D	0.47	0.7358490566037735	20.0	1200.0	11.823	12.22971	12.3753123589848	20.4309227568749	0.821661885914048	0.737182548791889	0.1584031601041292	0.1567841829115626	1.5090529844758085	0.0673414817643166	0.3897793882931225	0.1268422622146881	0.4268364658905741	0.3938043092262189	0.0019591562879016	0.0952669732422903	48.02653062983956	1.6453913015366683	0.259359186747608	0.9876610567887848	0.1581400411927489	0.1152655926258929	1.9711812895419265	0.1803566273450345	0.0681867942691314	0.1288830314986545	0.1430277011201186	0.3138043473618177	0.1768226531953398	0.367316748779746	0.1512792034052043
88	B-2	5	2D	0.47	0.7358490566037735	20.0	1200.0	11.823	12.22971	12.5447725838975	20.9417731953578	0.822104018961292	0.728656040634705	0.1448457087551638	0.1978325185823132	1.5117736270301008	0.0651177732731936	0.7658155307639403	0.1610251045392149	0.4155270946703524	0.5607020227216171	0.0030244316725521	0.0160036519529596	4.691457597868369	0.3917880389022588	0.0336140440802301	0.8866096932834336	0.2596098420911999	0.2622639950610487	1.974388981010516	0.2466709011797379	0.0748368440704255	0.4102236222959392	0.1817440840701188	0.5508588612494173	0.4060720945760725	0.4761001655963216	0.0782713967098497
88	B-1	5	2D	0.47	0.7358490566037735	20.0	1200.0	11.823	12.22971	12.5501697956432	20.6972752816481	0.820407692507957	0.739105955546799	0.1412652503781949	0.1918612352731575	1.5100433717410238	0.0652938550740901	0.7581629930892916	0.1625948835633024	0.4246915188726673	0.5582268085252169	0.0026892284312849	0.012590719209055	4.0819076663706495	1.0064522059045185e-05	0.0278699949835095	0.8718471096066891	0.2447309755846908	0.2473141551458964	1.9736528911203848	0.2438982398797179	0.0753953622543281	0.4105551802547024	0.1819138019346567	0.5474384861438231	0.4062669592680978	0.4517661096281089	0.096526695004472
88	A-1	5	2D	0.47	0.7358490566037735	20.0	1200.0	11.823	12.22971	12.7391765353678	20.9576617426614	0.821386936254507	0.740032406317007	0.159882576407031	0.1564686316500752	1.5092664167649008	0.0672902258425796	0.3786471744847005	0.1252976370327698	0.4241602718482487	0.3869087699395589	0.001954696196178	0.0968213040809338	48.93266101926411	0.0002518859119018	0.2624663501340915	0.9878867804060304	0.1597520602339599	0.115600415475798	1.971530610541257	0.1819809255736736	0.067831902239667	0.1236239414158354	0.1413714394803797	0.3133733780176598	0.170840037677518	0.3688903512068071	0.1388691572694983
88	A-3	5	2D	0.47	0.7358490566037735	20.0	1200.0	11.823	12.22971	10.4936579496765	20.2681437738432	0.815437638828054	0.634924628993177	0.1597676130833773	0.1574691814350266	1.5090130144517204	0.0674107435969189	0.3856139075749277	0.1256861495122288	0.4225039383532096	0.3912423562728723	0.0021164307277271	0.1019815181235442	47.58561589921026	2.0248726777417576	0.2736255605939949	0.9875481512728816	0.1581345850416265	0.1132539479975988	1.9713626353921807	0.17753999832861	0.0676578776036592	0.1161870881552346	0.1386500166678528	0.3038705010527955	0.1622300793700582	0.3727046475561697	0.1431316404291598
89	A-2	5	2D	0.53	0.9787234042553192	20.0	1200.0	13.05	13.41351	13.3194509048379	22.778922204409	0.809630979290465	0.722214215655692	0.2092152245777516	0.2121594867239167	1.5156560918634456	0.0664323034959021	0.4140728866749893	0.1170709227376949	0.4042230627117781	0.4083265533631211	0.0037804097714932	0.1772022888149197	46.27383101989121	3.625401363763572e-06	0.3376198397270593	0.9871996807825376	0.1912951598357596	0.1354956764348826	1.9764325152406768	0.16683955151482	0.0646775254169916	0.108306872746886	0.1575383808880997	0.2581570975611626	0.1529095324557009	0.5248574519737191	0.1054834382982435
89	B-3	5	2D	0.53	0.9787234042553192	20.0	1200.0	13.05	13.41351	13.6489219100772	22.951719924782	0.811227558737654	0.733061510534993	0.199888858961923	0.2135146916110482	1.5156847294569975	0.0666789832011231	0.4681670440258045	0.1251439111531113	0.4061787331070064	0.4382901032607543	0.0037340975470768	0.1561801846982615	41.22541637684925	1.1276837349194595	0.2971086864257521	0.9856546556621464	0.2033961583768843	0.1559719649302549	1.976375220076925	0.1775472545333371	0.066460117519292	0.166838303018711	0.1679391008749482	0.2967125804672414	0.2175664704826828	0.5256668412395648	0.109527102657223
89	B-2	5	2D	0.53	0.9787234042553192	20.0	1200.0	13.05	13.41351	13.4511971279077	22.8791930873166	0.81041862656773	0.725455570079036	0.1906236188979342	0.2392467408225893	1.5171366673685145	0.0656489298072626	0.6550739630574812	0.1421950887092504	0.4033248387655432	0.5219405248927783	0.0038286704641082	0.0977986567070442	24.94376450620515	2.922046307283797	0.1648700722619459	0.9765109015214164	0.2667305220355656	0.2561408330899637	1.977951063669706	0.2127892013118596	0.070834471191187	0.3602981733594404	0.189719506423668	0.4318050889725111	0.3751940630054499	0.5931862306195972	0.1841559931302577
89	A-3	5	2D	0.53	0.9787234042553192	20.0	1200.0	13.05	13.41351	13.3446335062758	22.4870580999732	0.810180817080198	0.732473729117372	0.1844285075649638	0.2564705289754576	1.5175404135243449	0.0652867105074284	0.7906230243993998	0.152746888966042	0.407777459771683	0.5685387128843665	0.0041407167239141	0.0703402287305091	16.387452516195673	4.222201808839049	0.1118380342024831	0.9646798129720764	0.2973664027760854	0.3021365340817082	1.9786557682673669	0.2248452177041436	0.0726417118397236	0.4160412583973541	0.1882222453793109	0.4803845060258339	0.4094727994152462	0.6289472917876751	0.0472930072113408
89	A-1	5	2D	0.53	0.9787234042553192	20.0	1200.0	13.05	13.41351	13.2867694149824	22.4368849803679	0.810301317593264	0.730819776949433	0.2044742224762433	0.2071840146508568	1.5153698920654533	0.0665829019054539	0.4132524879752425	0.1180520057759224	0.4062687399988174	0.4078474939657288	0.0034581848509695	0.1690429045946632	48.28197475830992	2.951822478614793e-07	0.3314775416971586	0.9877255368064278	0.1884637274647512	0.1337409770082254	1.9762267432809568	0.1681801339781793	0.065007647728956	0.1096377579247408	0.1570442320176739	0.2622537183040239	0.1544982023580095	0.5099678962537455	0.1100911710655372
89	B-1	5	2D	0.53	0.9787234042553192	20.0	1200.0	13.05	13.41351	13.4300878671859	22.7183872543465	0.810845479189418	0.729059974753775	0.2034693471797184	0.2055043074859489	1.5152396134492288	0.0667703019058964	0.4100013114232536	0.1182730041991938	0.407570050768289	0.4059413654082252	0.003345208828289	0.1678587567492346	49.5788573944093	5.4422394525865214e-08	0.3329088467640279	0.9880427727701336	0.1860519116871076	0.1308553077932897	1.9761090278153608	0.167007334523791	0.0648945382853247	0.1033268651028712	0.1540577541150733	0.2595211024676829	0.1469115858211363	0.5042183720284732	0.1149735875910931
90	A-1	5	2D	0.42	0.896551724137931	20.0	1200.0	12.304	13.00737	13.2722812447836	22.4510686933083	0.800651684312854	0.738354516335345	0.1993468489070432	0.2166479539425389	1.5071736495534829	0.0660694514214261	0.4867889566870626	0.1376041502030131	0.4822533860047001	0.4479148906435124	0.0018609382353569	0.0939728608877532	49.89757111886417	4.1874857828975e-07	0.2091814371239684	0.9881182404082826	0.1800157426891935	0.1386201033878072	1.9728237482707176	0.1798498480654171	0.0694266863312154	0.1700443378840594	0.1506595314539731	0.3085651768713316	0.220824087027651	0.4492409182180993	0.3568223159828349
90	B-2	5	2D	0.42	0.896551724137931	20.0	1200.0	12.304	13.00737	13.1827175612817	22.3714435937124	0.802237881144511	0.73452701441098	0.1990733716629844	0.2171901695120584	1.5070197703393806	0.066114779501802	0.4910056312289943	0.1389773414717654	0.4859636905176752	0.4500486681043864	0.0018098034552622	0.0915559951601376	49.98891610242187	1.6764528339831217e-14	0.2048568284512924	0.9881396944977978	0.1791509609790073	0.1381805785186287	1.9726989313990984	0.1792486619299313	0.0697495716747202	0.1713080508388706	0.1497075044682748	0.3091794810310324	0.222100690706595	0.4469267431908249	0.3847254639405815
90	B-3	5	2D	0.42	0.896551724137931	20.0	1200.0	12.304	13.00737	13.1329236272937	22.1391695728916	0.803133180307103	0.738605476442364	0.1976297235542466	0.2163041233609517	1.5067703845770168	0.066188878262368	0.4944918581621111	0.1399639712035332	0.4892618253523338	0.4518003989472064	0.0017966606192428	0.0909110238453925	49.99999805845656	5.564073991944422e-06	0.2056331279317438	0.9881422920351332	0.1756632767143906	0.1348878580816401	1.972888288742174	0.1776724985316735	0.0696155132229983	0.1678773879469022	0.1489403891639536	0.3051050467159224	0.2186252526536316	0.4421030052879845	0.3676394576366549
90	A-2	5	2D	0.42	0.896551724137931	20.0	1200.0	12.304	13.00737	13.063190008485	22.3056594369343	0.800906996721662	0.731226781222383	0.198867954395975	0.2170329028639514	1.5070511143073706	0.0661954038017273	0.4913417575151767	0.1393019983594798	0.4870103456184704	0.4502180495996864	0.0018033295680578	0.0912324745092728	49.99112661671087	9.7417333412615e-05	0.204720843503813	0.9881402127186112	0.1782159287297591	0.1373779335267408	1.9728951256456988	0.1797331453668826	0.069666980661737	0.1708510373113518	0.1499304757834052	0.3082688108777165	0.2216394984785419	0.4456433108999651	0.3720520559439449
90	B-1	5	2D	0.42	0.896551724137931	20.0	1200.0	12.304	13.00737	12.384629676818	22.0608254565647	0.798373111089874	0.703161954661599	0.1925930645025906	0.2137521659854097	1.5057075312249957	0.0663883805479248	0.5098642961908655	0.1435324780929188	0.4952828929051397	0.4593933672258461	0.0015534113998715	0.0786026014114907	49.9999900721681	0.0034521745161294	0.1821292600123176	0.9881422901636095	0.1760943464444236	0.1392211441626961	1.9721152488459284	0.1832349905418183	0.070603532738744	0.1906054167765974	0.1508444125020475	0.3225878470825427	0.2410879216508797	0.4315759115595965	0.4270205614348697
90	A-3	5	2D	0.42	0.896551724137931	20.0	1200.0	12.304	13.00737	13.008473529512	21.8126483870257	0.80206084293942	0.743550764467508	0.1968070916486624	0.2156606930265981	1.5070224323640815	0.0662541070444377	0.49579736797083	0.1400512712489692	0.4865831658553474	0.4524535123577957	0.0017679988297519	0.0894483997391114	49.99301976555007	2.4781000777664103e-14	0.2018174240049554	0.9881406565020152	0.1782768466580014	0.1381053629738262	1.9727414622896493	0.1799208660492674	0.0697336644214695	0.1746679704222145	0.1498669116818416	0.3115994101396972	0.2254746253766189	0.4432144557395358	0.3778506054421315
91	A-1	5	2D	0.4	0.9833333333333332	20.0	1200.0	13.292000000000002	12.36425	12.660533195485	22.1731006066579	0.789522210873793	0.72320466126782	0.2089525256999472	0.2468887268205278	1.505525123188772	0.0655189829439679	0.5815541640068832	0.1502952506154371	0.52599040847174	0.4921942486620489	0.0014216061853604	0.0719332729783289	49.99999999936161	3.165135301356341e-08	0.1532520829275646	0.9881422924899688	0.1831895405227581	0.150556762330781	1.9735143025267208	0.1831101714309699	0.0714926458230653	0.2218633110883145	0.1559874529634875	0.3207575086006953	0.2699515942554027	0.4693787621296378	0.5167635085639848
91	B-3	5	2D	0.4	0.9833333333333332	20.0	1200.0	13.292000000000002	12.36425	12.9042986200585	22.0363641932251	0.79241966117395	0.7389911216117	0.2072871732967778	0.244983500607349	1.5057183990817151	0.0656469381649368	0.5818555712398108	0.1502319754254905	0.5220061005468467	0.4923237537641106	0.001443629606953	0.0730476581118256	49.99999999999966	0.4468980939569535	0.1556485358013921	0.9881422924901184	0.1840395961201838	0.1512804074688593	1.9735234022943804	0.1838592522341022	0.0714375075981573	0.221999236349488	0.1568928935772756	0.322345363651761	0.2700723145867997	0.4693115661880341	0.5110790177716986
91	B-2	5	2D	0.4	0.9833333333333332	20.0	1200.0	13.292000000000002	12.36425	10.5957886944593	22.2739002315296	0.783255970900682	0.607341984953309	0.2124118641508921	0.247279795500022	1.506529574351761	0.0655278547557707	0.5641524661935107	0.1469252915824656	0.5170735861537259	0.484603591519373	0.0016537716387308	0.0836807840357437	49.9999631847358	1.4612123946631627e-16	0.1749804225048933	0.988142283862748	0.1838635751802409	0.1472688294337068	1.9738520501547028	0.1789198685964923	0.0708567532837299	0.2009679420697634	0.1540817143055633	0.3079459913413807	0.2509063490736554	0.4782294089694725	0.5439794145246839
91	B-1	5	2D	0.4	0.9833333333333332	20.0	1200.0	13.292000000000002	12.36425	12.8655547794426	22.0185934110381	0.791610198377403	0.738121007213223	0.2049979124845009	0.2440847207827926	1.5053541426288213	0.0657279696056586	0.5906692991385801	0.1522785029240954	0.5281490770538328	0.496081741223961	0.0013524067626597	0.0684317821905823	49.999999999999936	0.7965883633208418	0.1480722860865485	0.9881422924901184	0.1806478851936605	0.1496346800682906	1.9734772900880264	0.18410406496184	0.071672649199178	0.2283223460262335	0.1561200467817383	0.3237786368596186	0.2756443154305563	0.4621511830416656	0.524494621715771
91	A-2	5	2D	0.4	0.9833333333333332	20.0	1200.0	13.292000000000002	12.36425	12.7610288603562	22.3064327708236	0.790456504512706	0.723731690169913	0.2105413397970166	0.2463895618965113	1.5061736360653906	0.0655613728932487	0.5702669040391591	0.1480755115705405	0.5193933446845175	0.4872964467087733	0.0015779639372237	0.0798449752235186	49.99999999999959	2.5893756144618847e-08	0.1683145520385901	0.9881422924901184	0.1834096346097886	0.148144975860002	1.9735699605862016	0.1808311400295773	0.0709843530018334	0.2077273376351595	0.1557363911210857	0.3122921032768923	0.2571750737610758	0.4743795129800319	0.46039132215553
91	A-3	5	2D	0.4	0.9833333333333332	20.0	1200.0	13.292000000000002	12.36425	12.3982805804982	21.3730816124856	0.790960012198089	0.733398113534809	0.195532162887962	0.2691237437969028	1.5064689324751883	0.064701367130614	0.7763656056477419	0.172221886860781	0.5349935147104479	0.5640693159303197	2.0402131576557903e-05	0.0001755507255006	8.004528641624631	21.01757005156024	0.0003489788686815	0.9302692773782536	0.2322996556814215	0.2337418384949929	1.9767408164879303	0.2317392597030978	0.0752750063421417	0.4062082864881609	0.1804159490613738	0.4646575064208706	0.4037019888853205	0.5030411330173964	4.370232758099828
92	B-2	5	4D	0.29	0.9859154929577464	22.0	2099.0	12.199000000000002	12.08776	11.5657980785157	21.6152878728186	0.794987725487421	0.673060585233862	0.2676686680983434	0.3813059041865138	1.5015675697650068	0.0627799677316504	0.8245444074403925	0.1671517697215776	0.6006363695931168	0.578812708915074	0.0033617324329739	0.1093851958379133	31.938340875970454	14.601347701427054	0.1723045098278341	0.9815602153076248	0.2003550640961756	0.1441454225205165	1.975101302782993	0.2646478391870843	0.0743311370689734	0.1194498585337627	0.1	0.2270591205790489	0.1660294419644494	0.6348365225449436	0.0355894044748889
92	B-1	5	4D	0.29	0.9859154929577464	22.0	2099.0	12.199000000000002	12.08776	11.8806719965537	21.4695577185433	0.795525281976617	0.695606965055739	0.2650745565767017	0.3794301732030673	1.5012412642474071	0.0630129908611721	0.8314092536952932	0.1688797317581927	0.6030474973239726	0.5808326665130508	0.003258370625958	0.1039751885991971	31.310178593825444	14.923277569924464	0.1652530075276232	0.981197222126607	0.2018914313532853	0.1457825129286503	1.97543200292346	0.2723895424779852	0.0747794058157178	0.1220837058386532	0.1000000000000071	0.2316994951484041	0.1690714038434933	0.6291878747309151	0.0346046065369147
92	B-3	5	4D	0.29	0.9859154929577464	22.0	2099.0	12.199000000000002	12.08776	12.511194954522	21.5106931984113	0.798670967023772	0.728243283713835	0.2652380497822481	0.3790079673106218	1.501578841337298	0.0628990864443996	0.8289351306186095	0.1681794462614681	0.6016091885969889	0.5801069011857451	0.0032122336176001	0.1041950809515783	31.83695613565671	14.760140056256647	0.1653915577339364	0.9815025800358488	0.2035970752869406	0.146787275181006	1.9753831101226016	0.2718671819257406	0.0748988839718141	0.120969468614078	0.1	0.2329992536690747	0.1677872280037295	0.6299903234432063	0.0350857383852392
92	A-3	5	4D	0.29	0.9859154929577464	22.0	2099.0	12.199000000000002	12.08776	12.8146054160538	21.8766936883473	0.798656640349048	0.733438063870796	0.2683897901366878	0.3830263829922429	1.5014289941452912	0.0625402048638543	0.8271272495021962	0.1668303074703279	0.5992518308254903	0.5795749816918644	0.0033513408218996	0.109049328868794	31.939014879119807	14.351261344600315	0.1706096835011995	0.9815605972636552	0.2042291629446503	0.1470986106681254	1.9751883405266728	0.2668697927214013	0.0744906637432469	0.1202625156329496	0.1	0.2301384856733103	0.1669703934644799	0.6391743225291624	0.0372661228250996
92	A-1	5	4D	0.29	0.9859154929577464	22.0	2099.0	12.199000000000002	12.08776	12.396034807073	21.8575115593599	0.797055819683497	0.711530192273794	0.2688878839174389	0.3821508485625199	1.5011096961497958	0.0627410201349191	0.8212274759090964	0.1667177701488393	0.5992542236699048	0.5778297210190041	0.0033484905579969	0.1086686369267219	31.85302175548791	14.657566356636847	0.1704042785819847	0.9815117370419124	0.204067446292769	0.1468912447283647	1.9749920059932224	0.2671486941747956	0.07461960575113	0.1198171359366381	0.1	0.2303414977481105	0.1664549646775636	0.6377107302176065	0.0362261055184575
92	A-2	5	4D	0.29	0.9859154929577464	22.0	2099.0	12.199000000000002	12.08776	11.3582392505014	21.7650928829831	0.79300098358059	0.658077074650692	0.2679114350237142	0.3814765285207511	1.5011476254376102	0.0627833050906237	0.8238904303841479	0.1672792429475648	0.6001885324582171	0.5786192622713761	0.0033256910679152	0.1076294663881792	31.76303799427977	14.588837199622974	0.1693366869287435	0.981460331378468	0.2033251368155469	0.1464885023040067	1.975018601589516	0.2688304020798432	0.0745174872537993	0.1204642996841978	0.1	0.2304747806130394	0.1672037042459996	0.6355944972129371	0.0359374378801441
93	B-1	5	4D	0.41	0.9830508474576272	20.37037037037037	2131.0	13.582	13.99374	14.1221930541556	23.6442242071722	0.796824764617331	0.74957354788783	0.2514994323620043	0.2925634147699116	1.5078766616037893	0.0646203665152355	0.5632766405166292	0.1385945752472229	0.5064992538218418	0.4842155519141768	0.0033026359715888	0.1671133801623962	49.9999999999998	7.541796026671088	0.2893143779527845	0.9881422924901184	0.1790114640431707	0.1179418541818706	1.9738090702180973	0.1832993490007377	0.0669738041238542	0.0588508440634144	0.1	0.2041863682253737	0.0893234706970338	0.5776186491141784	0.1484106026190854
93	A-3	5	4D	0.41	0.9830508474576272	20.37037037037037	2131.0	13.582	13.99374	13.9358320248651	23.4289453931477	0.797234478933023	0.746094931916988	0.2527155886993387	0.2946820702860107	1.508047813409923	0.064409707930525	0.5660621008884434	0.1385717886912026	0.5052992849291961	0.4854476450758074	0.0033197918465198	0.1679814674329589	49.999999999714696	6.858924245464839	0.2880423477846749	0.9881422924900516	0.1823695565946169	0.1205196946248133	1.9742360534240992	0.1832938157210937	0.0672458980645531	0.0608542394644983	0.1	0.2066583672861289	0.0920842083328536	0.5831832323437829	0.1486723433703843
93	A-2	5	4D	0.41	0.9830508474576272	20.37037037037037	2131.0	13.582	13.99374	13.9075716817335	23.8176391280444	0.79689204822913	0.732745403861052	0.2591194301112797	0.297184901377334	1.508631224729982	0.0640890766675615	0.5469031915117559	0.1357702796526312	0.5023308267745118	0.4768520966367458	0.0035494308395055	0.1796012004789804	49.99999999999952	5.916939727128923	0.3035794184299769	0.9881422924901184	0.176607732935605	0.1148258111245615	1.9740462463737327	0.1690833155643361	0.0661656379859141	0.0501743112597991	0.1	0.1940897547955112	0.0771705531745475	0.5916119129808761	0.1475956311335668
93	A-1	5	4D	0.41	0.9830508474576272	20.37037037037037	2131.0	13.582	13.99374	14.0730501685572	23.6903222055383	0.796972671758728	0.74537331180531	0.2550095397638883	0.2945897866090185	1.5083593883584832	0.0643928787946693	0.5552108477266274	0.1368731055573712	0.5037129032363619	0.4806142954935394	0.0034480455864833	0.1744711066760473	49.99999999999672	6.993471347751478	0.2983244894070008	0.988142292490118	0.1769794246943215	0.1157757958612224	1.9736799259536573	0.1747819844572562	0.0664990173928695	0.0541765861268344	0.1	0.1979626073566374	0.0828164554888708	0.5848366891462883	0.1485356606832744
93	B-2	5	4D	0.41	0.9830508474576272	20.37037037037037	2131.0	13.582	13.99374	13.8449688802092	23.6373852191987	0.796756896696479	0.735134355764323	0.2557050126547753	0.2949780375362968	1.5082771045466088	0.0643767434000054	0.55358723113709	0.1365995844901507	0.5035936808884597	0.479883285975192	0.003454693773588	0.1748075049435555	49.99999999999997	6.549177482946441	0.2984356245526262	0.9881422924901186	0.1773136583115736	0.1159605634202157	1.9738434421080688	0.1746941385765411	0.0664526667837223	0.053985510898721	0.1	0.197970694558914	0.0825484815780291	0.5857461059000681	0.1511568867280089
93	B-3	5	4D	0.41	0.9830508474576272	20.37037037037037	2131.0	13.582	13.99374	14.0787946871856	23.5889909060696	0.797533504697173	0.748354157360539	0.2042400541579712	0.3211041159795613	1.508090206744999	0.0580036015495712	0.9721897318495644	0.148948624022032	0.4467377892500581	0.6183666717539589	2.360678590179947e-13	1.416407154718081e-13	2.584480277511936e-10	1.6076344380329112e-10	1.970583899388561e-13	4.30746712733113e-10	0.4698634305139755	0.3976712455553065	1.9761518709751085	0.3344741002493195	0.0828661734942024	0.2463549613135476	0.1574170008131893	0.5532622107497449	0.2910775886883245	0.7187753615350094	0.0146685876362761
94	B-1	5	4D	0.0	1.0	20.0	800.0	0.0	0.0	0.0024288466965389	0.118777190158244	0.0878124614388842	0.232868585871867	0.2944519218000678	0.5045158594723766	1.4919938168296252	0.0599501146268157	1.1134065771692998	0.2075869535842614	0.8040584727970029	0.6498204174100618	0.0017783091148	0.0010669854688805	3.039936324047164e-13	13.443609159585137	0.0017004791633347	5.06656054007604e-13	0.1555567699602099	0.1218788093304334	1.9634777950161248	0.5193799258744084	0.0899999999999999	0.1835005147098963	0.1	0.1942410480396623	0.2342059912721823	0.6274616542716905	0.1211509243801603
94	B-3	5	4D	0.0	1.0	20.0	800.0	0.0	0.0	0.0020816225036528	0.118210509250338	0.069834760224117	0.25215886419938	0.2928865472561565	0.5056321824282121	1.491863069331362	0.0599191148017323	1.1263755784112193	0.2093092879489648	0.8058485211638424	0.6524510613431065	0.0018223232696783	0.001093393961807	1.2537706705253424e-19	13.321951631855386	0.0017425906376059	2.089617784208904e-19	0.1537052175236294	0.1207275604575306	1.9650339092800144	0.5202128356084119	0.0899999999999999	0.1854486815905973	0.1	0.1924088881985516	0.2361054082044529	0.6274531368475498	0.115908932292851
94	A-2	5	4D	0.0	1.0	20.0	800.0	0.0	0.0	0.0056436216515197	0.115520698969171	0.178648261398193	0.273463450269973	0.294677040169255	0.5040905152990967	1.4918839016498058	0.0599299711195816	1.1106541962331364	0.2077754518425462	0.8049341137658826	0.6492569910849306	0.0017647380500019	0.0010588428300011	1.1728181465098414e-16	13.896761413167331	0.0016907652279048	1.9546969108497358e-16	0.1546072409085344	0.1211012960278121	1.9640383154201624	0.5185621805879885	0.0899999999999999	0.1832834692358014	0.1000000000000043	0.1933751210062124	0.2339937920745591	0.6262506541569101	0.1240313267179453
94	A-3	5	4D	0.0	1.0	20.0	800.0	0.0	0.0	0.0002579347111402	0.116697860974679	0.0198528361188852	0.111333109070742	0.2921052543914199	0.5023122480066584	1.4918229639697511	0.0600182000104317	1.1196275673068243	0.2086492413388886	0.8061329916551371	0.6510872403960799	0.0017591443117234	0.001055486587034	8.701224645035565e-21	13.850258163166515	0.0016938917245879	1.4502041075059282e-20	0.1526346135044957	0.1197456390139555	1.9647898624570377	0.5186040049290135	0.0899999999999999	0.1845247959462911	0.1	0.192173116620275	0.2352058174575833	0.623113373607648	0.1176915214793801
94	A-1	5	4D	0.0	1.0	20.0	800.0	0.0	0.0	0.0002116969167317	0.11755932987871	0.0087459129426365	0.205898072453965	0.2965890422994636	0.5045418583615406	1.4918059501940752	0.0597760010516241	1.1011480075252025	0.2056263410729887	0.8005132701281051	0.6472970033495977	0.0017620824536248	0.0010572494721749	2.8758476194316853e-24	13.37364414993228	0.0016774470111565	4.7930793657194746e-24	0.1594479049021472	0.1246738397725114	1.9619355371298863	0.516908743193285	0.0899999999999999	0.181909551267064	0.1	0.1978092828607382	0.2326478183727061	0.630272947606227	0.1285228768733577
94	B-2	5	4D	0.0	1.0	20.0	800.0	0.0	0.0	0.0002409577408858	0.117997088728431	0.0130884172952248	0.156020784531598	0.2943374677119603	0.5051812629689655	1.4919378711574725	0.0599056730099174	1.1163335232038407	0.207332710163502	0.8023387859618368	0.6504175954799312	0.0018039612914459	0.0010823767748675	1.1089697272961454e-26	12.19301568798042	0.0017190520139181	1.848282878826909e-26	0.1572655576192866	0.12337220961045	1.9628354496003395	0.5200417794807657	0.0899999999999999	0.1844833381070846	0.1	0.1959421620242449	0.2351654001374112	0.6296358493542831	0.1207423098519736
95	A-1	5	4D	0.46	0.9814814814814816	22.0	2546.0	13.505	13.77741	14.104540091511	23.6898576194771	0.798596575768006	0.745536714389663	0.2708546570573135	0.2975199610227548	1.510414015725165	0.0639475503516191	0.4984487557095939	0.1273845998438242	0.4829217403383965	0.453775156208901	0.0042115174489025	0.213102782914469	49.99999999999997	3.858611696673047	0.345899369044822	0.9881422924901184	0.1680496598441403	0.105460435118402	1.9734129941579308	0.1378305823998387	0.0634792108399642	0.0275551834869081	0.1	0.1711788906167815	0.0439087815892178	0.6160831790556258	0.1375809612998857
95	A-3	5	4D	0.46	0.9814814814814816	22.0	2546.0	13.505	13.77741	13.8478820815243	23.0584680711516	0.79917531597897	0.751468610599017	0.2677854336907336	0.2961199962683074	1.509909761564733	0.0639839982821454	0.5058106939838167	0.1285011889462392	0.4856030591100247	0.4574116498743312	0.0040848360440572	0.206692703829295	49.99999999999999	4.242595647747783	0.338952487302764	0.9881422924901184	0.1692301441236441	0.1069857571259021	1.9734190122198063	0.1431779715415736	0.0639182244662739	0.0321909000309983	0.1	0.1754444535872112	0.050919587784987	0.6097984572235047	0.1372353003731987
95	B-1	5	4D	0.46	0.9814814814814816	22.0	2546.0	13.505	13.77741	13.4724376731325	23.3594215124146	0.796447634261012	0.724147228894576	0.2584071597927645	0.2901818035040532	1.5096418541199874	0.0643901257483236	0.5229634803337925	0.1320951514907871	0.4912634746362882	0.4656994546059018	0.0037753737706288	0.191033912793822	49.99999999999999	5.888414353453365	0.3234109880054828	0.9881422924901184	0.1707061512965527	0.1094689539168036	1.9737170079956927	0.1569025485822746	0.0650064092215717	0.0412712903744917	0.1	0.1853255373582289	0.0643585499522207	0.590684670214679	0.1345432994873384
95	B-2	5	4D	0.46	0.9814814814814816	22.0	2546.0	13.505	13.77741	13.7003492786017	23.2207414023463	0.798405726558801	0.738978688704713	0.2048519468146258	0.323908920153469	1.5100898077505376	0.0556708774454771	0.9811854619403736	0.1398580858451228	0.418312002424988	0.6205378720952179	6.357050738919466e-13	5.0634650042347576e-12	7.365116548834429	37.70453691344665	6.5392091830219595e-12	0.9246715353979597	0.5139712367780532	0.4504148340625829	1.9749106284341484	0.3330960165106924	0.0817156484887633	0.2763424912376651	0.1691097209951514	0.5816879975684729	0.315336177351602	0.7743237542211154	673954.8161812902
95	B-3	5	4D	0.46	0.9814814814814816	22.0	2546.0	13.505	13.77741	13.854089092663	23.1883188548647	0.798526177936596	0.748203188242682	0.2658557078660512	0.2941982394503866	1.5099404171408186	0.0641057603364832	0.5066087006814071	0.1290863814052421	0.4861565340074833	0.4578029256135948	0.0040361225936806	0.2042278032402408	49.99999999999999	4.591743303857575	0.3374822403992712	0.9881422924901184	0.1686965900613738	0.1067252180057023	1.97345920577338	0.1450354193144182	0.0640224015770313	0.0326459708929173	0.1	0.1763612255932454	0.0516022742495945	0.6051512606963297	0.1349620624500586
95	A-2	5	4D	0.46	0.9814814814814816	22.0	2546.0	13.505	13.77741	13.6851499708869	23.4000383344131	0.798410541439833	0.732498483421106	0.2078875592566952	0.3301018857923586	1.5107122603628915	0.0543772187703111	0.9878866776474864	0.1358889751621307	0.4069646849477265	0.6221392820746361	1.892127016403017e-13	2.329306559056873e-12	11.710519002497762	47.89296901789547	2.8716755364116028e-12	0.95126119379059	0.5351190117813249	0.4810296398676906	1.9740527801866583	0.3334064043811596	0.080798389181764	0.2989208555054334	0.1783981217782431	0.5930353150494018	0.3325330074107137	0.8111315256623787	1369795.8056518915
96	B-3	5	4D	0.42	0.9827586206896552	22.0	2699.0	13.286	13.30004	11.9090825461887	23.4274358919651	0.790181090329376	0.64331979509311	0.2049998386611125	0.3227952608610468	1.5076344290109651	0.0587091787965723	0.9746122678401876	0.1528524584278325	0.4580229833328982	0.6189538134216442	3.586749478667127e-14	1.6768363021564937e-13	4.075086208640428	0.2126084424481048	2.379308678900445e-13	0.8716601206431042	0.451885777252415	0.3819625190042432	1.976895186533476	0.3341798333197838	0.0831443660952735	0.2452634232630119	0.15616774374798	0.5419770166668639	0.2901621157534647	0.7047577798654576	2372.2250044577568
96	A-3	5	4D	0.42	0.9827586206896552	22.0	2699.0	13.286	13.30004	13.5036943498311	22.7988885785539	0.796444819995967	0.743675084038801	0.2516668729734344	0.2990954814257981	1.5076480836509043	0.0644758667190916	0.5884578923399667	0.1413932914534131	0.5141086107328695	0.4951440822033215	0.0033786272793729	0.1638297205783885	47.89002480344454	9.295008720016495	0.2816032848166081	0.987626321033406	0.1788586084801343	0.1188496898799096	1.9740223948064035	0.1861253332281208	0.0675754384238415	0.0644896261345459	0.1	0.2042881044505224	0.0970513663391459	0.5817748918840961	0.1441820684593041
96	A-2	5	4D	0.42	0.9827586206896552	22.0	2699.0	13.286	13.30004	13.5610787521137	23.3141922761464	0.796690472203934	0.730103181270967	0.2620662646481799	0.3064123242731459	1.5084232780244322	0.0640538777927487	0.5692169714575815	0.1371267206217915	0.5061218248389084	0.4868360495554373	0.0038731183986216	0.1845200024966608	47.04119851392328	7.955459561030973	0.3047840866206133	0.9874058584016384	0.1753034580785488	0.1144798669657088	1.9735059661978465	0.1655247497016313	0.0662262469390349	0.0530382698692309	0.1	0.1890940885404783	0.081217705479729	0.6054121937355157	0.1382733680711675
96	A-1	5	4D	0.42	0.9827586206896552	22.0	2699.0	13.286	13.30004	13.6315855359397	22.9946934283399	0.797231417381328	0.74359137574506	0.2562609957544281	0.3009482071358773	1.507968656053318	0.0642193373639228	0.5743816348246472	0.1389149456703395	0.5102600016340596	0.4890928279122919	0.0035601750970148	0.1731395031938366	48.032299950362216	8.488076805855158	0.2935593603410946	0.987662520575576	0.176050307919762	0.1157061323624802	1.973800127697432	0.1756912391072286	0.066791962438298	0.0572333427284621	0.1	0.1961806380248459	0.0870822263685855	0.5897938426921941	0.1478466031502493
96	B-2	5	4D	0.42	0.9827586206896552	22.0	2699.0	13.286	13.30004	13.5908263204036	23.2848857479019	0.797135572135312	0.73221658454311	0.2601974128038633	0.2936292509307417	1.5075856465742126	0.0646904535294092	0.5284864356129448	0.1346710463326419	0.5174039227305953	0.4683143890213389	0.0037762067161503	0.1910760567535478	49.9999991833971	9.855346142515009	0.3366950022547256	0.9881422922987544	0.137999286709624	0.0827995720257744	1.9715160347471188	0.114090479534333	0.0633087807005773	1.4390762543658872e-23	0.2499999918762777	0.145901075014679	2.398460423943145e-23	0.5675048797100639	0.0988917378742376
96	B-1	5	4D	0.42	0.9827586206896552	22.0	2699.0	13.286	13.30004	13.6039925565729	22.9918514702853	0.797197450610174	0.742209551933552	0.2498625359735332	0.2960983262403605	1.5076011798955935	0.0646329269506312	0.5850449091404596	0.1418427606092946	0.5152142645632702	0.4936900742139858	0.0032492910655704	0.1598694284225163	48.60132582657722	9.144928514276486	0.278174520729965	0.9878052066703475	0.1785907996339206	0.118741345232393	1.974096698374724	0.18936937241108	0.0676136814055182	0.0648794085461946	0.1	0.2066112147067646	0.0975807157091208	0.57470909989527	0.1462329421824303
97	A-1	5	4D	0.42	0.9827586206896552	19.642857142857142	1457.0	12.942	13.84379	14.0105107446593	23.7843188346297	0.795555348347356	0.740445076538149	0.3117558583486804	0.3719933066315161	1.5086224444087255	0.0630781056173822	0.5932199401220672	0.1345206901491698	0.4989577791304376	0.4971589228230466	0.0063270487611854	0.2595310956967808	40.41929754183733	7.529814590745821	0.3481112611857508	0.9853727382974308	0.1782739169961833	0.1140162469823728	1.9716393565508088	0.1198510871854876	0.0641180909986146	0.0395565257300863	0.1	0.1529309596838116	0.0618499290347018	0.7455406493106697	0.0354000826098033
97	A-2	5	4D	0.42	0.9827586206896552	19.642857142857142	1457.0	12.942	13.84379	13.6550942299651	23.7133199378213	0.794817564499436	0.724494152736535	0.3159287021386335	0.3529113783666601	1.5086790955468172	0.0628584649049618	0.5170601973726281	0.1277282245712551	0.5039695257831106	0.4628758580681463	0.0049781126155484	0.2518924783600491	49.99999598508458	4.125159725623213	0.3597110794641331	0.9881422915492551	0.159099122199066	0.0954594733194407	1.971078403716436	0.0908560333557225	0.0620993422237117	6.8528850266629355e-15	0.2499999818852001	0.1363193947527562	1.1421475044438096e-14	0.70026333004615	0.1759159171891393
97	A-3	5	4D	0.42	0.9827586206896552	19.642857142857142	1457.0	12.942	13.84379	13.568247385774	23.3583340603991	0.795378917261075	0.730310951042896	0.2305492984400586	0.3591048081274813	1.5081107557547475	0.0546520770724967	0.957605295514904	0.1374859615584348	0.4348104807315248	0.614793297295734	1.3627547727660956e-14	8.180504372877962e-15	0.0002917426055546	0.0517138661245866	9.905100011177494e-15	0.0004860013637508	0.5169369573793019	0.4667833064444585	1.9722633586982896	0.3298865511792292	0.0815701772115141	0.3029791733423246	0.1803446546580605	0.5651895192684653	0.3355328475859138	0.8258881145719481	0.0425713544939051
97	B-1	5	4D	0.42	0.9827586206896552	19.642857142857142	1457.0	12.942	13.84379	14.0902836786924	24.0310318705214	0.795650623657275	0.736927748484178	0.2978035032949019	0.3620468805276961	1.5082202882634477	0.0633053483971588	0.6157240479779611	0.137755066815956	0.5054797764667086	0.5064669478259125	0.0059531882246305	0.2393295438673497	39.601911116660816	9.215831467002513	0.3341452470454104	0.9850753363873952	0.1772782156081865	0.1148676221193273	1.9719075935778896	0.1334873492064319	0.0650387268044796	0.0479511412344274	0.1	0.1603749764878809	0.0740042546156713	0.7162440465143732	0.0320995168826486
97	B-2	5	4D	0.42	0.9827586206896552	19.642857142857142	1457.0	12.942	13.84379	13.8346843892293	23.8166139433668	0.795991809902567	0.729760982824251	0.3073138218308809	0.3688961654972354	1.5084351969734278	0.0631246344445785	0.6003891113633156	0.1357770004097796	0.501614803328562	0.5001620771796546	0.0062162434357951	0.2534860374823779	40.17801007964452	8.100640194708816	0.3446833031372684	0.9852861873635296	0.1767345202352341	0.113035019656867	1.9716683986496824	0.1226998328519089	0.0642610449685253	0.0395752199763641	0.1	0.1537018935341697	0.0618773503729971	0.7354172226364803	0.0345984397174232
97	B-3	5	4D	0.42	0.9827586206896552	19.642857142857142	1457.0	12.942	13.84379	13.9039232524019	23.7696703232782	0.79623669928272	0.734635672223278	0.3067452434648472	0.3680953613219606	1.5085884569628685	0.0631739383748547	0.6000034855117293	0.1356411073814386	0.5011624283719545	0.5000014522923356	0.0062133551662721	0.2534459195765896	40.19050895921175	8.04264829651375	0.3450670284455683	0.9852906959165436	0.1765369230685047	0.112941873630277	1.971785105175252	0.1230980997930524	0.0642588401452625	0.0397634651559563	0.1	0.1537705431824771	0.0621533853082141	0.7344831545288273	0.0340077705429501
98	A-2	5	4D	1.0		22.0	3500.0	0.0	0.0	0.0131968721535981	0.0544636157935828	0.873359749007769	0.277441463397858	4.844956571129488e-18	4.038657070403712e-17	1.5506892301002455	0.0712574806622854	7.735796226677411	0.2485143416408495	3.9341399494708776e-17	0.9280212731112842	0.0098384165056631	0.4978238751865568	49.99999999999999	4.2245180111118494e-36	0.4849406030346768	0.9881422924901184	0.5030805767330001	0.5287428261192497	2.0127199774481688	0.2894352330000763	0.0613772489004593	0.4510102169972452	0.1717859207480636	0.5150593969653231	0.4291206780898757	1.0265667013058066	603373.3370934924
98	A-3	5	4D	1.0		22.0	3500.0	0.0	0.0	0.0099720599416429	0.0445575947754537	0.81469441772822	0.274706161368412	0.0035644583748479	0.00213867509516	1.5313145437820983	0.0321364502483741	1.9708825302082858e-08	0.1000000209963305	0.0022281525445122	3.2848041091144266e-08	0.0091098950410203	0.4609606890756301	49.99999999999999	3.665235143579971e-35	0.480246267704869	0.9881422924901184	0.4792804534519514	0.4967429502288488	2.010651305493568	0.288689907164688	0.0622795953113941	0.4364348194280117	0.1699736913986514	0.5175255797506187	0.4210923940869448	0.9598423143996389	209475.264612457
98	A-1	5	4D	1.0		22.0	3500.0	0.0	0.0	0.0105262646415304	0.0452631880202001	0.814866250124475	0.285392669908126	0.0039356797519063	0.0023614078511438	1.5306963535202385	0.0330519917007663	1.2093629228466202e-14	0.1000000233889072	0.0024745911940074	2.0156048714109933e-14	0.0090193921797734	0.4563812442965352	49.99999999999999	9.656417343395278e-19	0.4782558030792117	0.9881422924901184	0.4788468630441762	0.4955191495035736	2.010539090485968	0.2897776950502889	0.0624095483249534	0.4348175747741282	0.1699733506847781	0.5192696057267809	0.4201876595196373	0.9542618016512524	0.4493750881913821
98	B-2	5	4D	1.0		22.0	3500.0	0.0	0.0	0.0120646188446652	0.048764518407705	0.873271941309865	0.283308862295192	0.0034486960930458	0.0020692176644736	1.5337354079125272	0.0320880168853845	2.5070695234664394e-09	0.1000000070245168	0.0021307333766881	4.178449188317961e-09	0.0092636728998959	0.468741848734733	49.99999999999999	4.9342535618237516e-40	0.4826770616244848	0.9881422924901184	0.4807738304837159	0.5003182579510083	2.0108363364934694	0.2890469603952618	0.062050313671929	0.4406520201975809	0.1705078474405319	0.515192204998827	0.4234383940502202	0.9711293243502148	3267897.108701135
98	B-1	5	4D	1.0		22.0	3500.0	0.0	0.0	0.0110644294348093	0.0471157546063622	0.811051606481142	0.289543875668737	0.0048352206841467	0.0029011324124462	1.5283915848608909	0.0348847932276968	4.0499238988339484e-10	0.2499998561868928	0.0031325268103665	6.749873160167164e-10	0.0085727566004768	0.433781483984127	49.99999999999999	5.584802761913832e-41	0.4683799066155172	0.9881422924901184	0.4776571450297029	0.4894490939037337	2.0092764099853486	0.2914101452068739	0.0630450794578378	0.4246870563891541	0.1689640576822559	0.5284875665741163	0.4144553732196917	0.9261317103003068	2365890.5240533124
98	B-3	5	4D	1.0		22.0	3500.0	0.0	0.0	0.0109065618666557	0.0449854553672482	0.839919030170379	0.288654495087181	8.650677572866892e-17	5.841431631599526e-17	1.6003455823650163	0.084958901239799	0.0752571208897381	0.2499639245294571	6.244242218559571e-17	0.1114495775928689	0.0086844285015359	0.4394320821672295	49.99999999879213	1.2129023914549109e-06	0.4697342248798689	0.9881422924898354	0.4820611820716855	0.4960587952105279	2.009892512292893	0.2903553913345384	0.062962731739958	0.4290370053831901	0.1688835580591108	0.5302657751201311	0.4169305896083168	0.9354908773777576	66581.37342794094
99	A-1	3	4D	0.49	0.9803921568627452	19.81981981981982	800.0	12.478102	12.526348654069052	12.7285751845058	22.5402836577547	0.79564524850188	0.709742711718822	0.2617202841979694	0.4314858429180511	1.5118415907057856	0.0493518627989982	1.0486526607607851	0.1225880585070545	0.3340802222583777	0.6360664594304994	3.207903950067203e-13	1.6216290210028813e-11	49.95104661001179	49.941572090161934	1.2555549449629784e-11	0.988130809543295	0.8104871529149971	0.8600777222514017	1.9747577315727185	0.3621279335241783	0.0733225682997723	0.4611861263414816	0.2499999999994564	0.6659197777290666	0.4345949451218847	1.2915635651856692	4595944.055738767
99	B-1	3	4D	0.49	0.9803921568627452	19.81981981981982	800.0	12.478102	12.526348654069052	12.6981717967013	23.0118362247418	0.792724127375705	0.696093931088371	0.4785136357560559	0.5000970409295937	1.5105521319535211	0.0638547836941598	0.4451050995431632	0.1137259899439425	0.4104496140264747	0.4258950604467701	0.0110723350212613	0.5602601520758249	49.99999999999999	6.248117163218932e-20	0.459827882097609	0.9881422924901184	0.2634259200697498	0.1580555520418614	1.9732587354789388	0.0853196840497479	0.0562608017161228	4.398727184105474e-14	0.1000000478579081	0.1297225038759161	7.331211973508588e-14	1.21841274504728	0.0500910428227358
99	A-2	3	4D	0.49	0.9803921568627452	19.81981981981982	800.0	12.478102	12.526348654069052	12.3751024258551	21.9172650052971	0.795282653950893	0.709971529230879	0.2520665307907311	0.4150400607830583	1.5117118305680997	0.0492106744939151	1.0465496608418434	0.1222091499583532	0.3341211657302638	0.6356016376127802	2.3568408428932866e-12	6.009380128872717e-11	24.89760687911165	30.73610656431221	4.837752505594262e-11	0.9764683798426768	0.7752502467393861	0.8271442224420329	1.9743738823540344	0.3610021095465884	0.0733018929389167	0.4669383543196624	0.25	0.6658788342213586	0.4376432363024456	1.242184283285185	1773152.7067813482
99	A-3	3	4D	0.49	0.9803921568627452	19.81981981981982	800.0	12.478102	12.526348654069052	12.5461929604293	22.2593974448208	0.792748124460276	0.710989743107521	0.2614702852602377	0.4297354056959953	1.5114138671761288	0.0493712282209798	1.0435343896469371	0.1229126730942482	0.3350768030779748	0.6349331028425322	1.957423787180205e-17	1.3444447440596558e-16	6.268439797579122	33.2504474198825	1.0483014449900459e-16	0.9126439165687268	0.8047749701720466	0.8527628208255008	1.974671847204151	0.3630277436793797	0.0732897642455078	0.4596289055103134	0.25	0.6649231969220251	0.4337640310868623	1.2824982265214964	0.3717574751463762
99	B-2	3	4D	0.49	0.9803921568627452	19.81981981981982	800.0	12.478102	12.526348654069052	12.3651964256337	21.9909119866898	0.794329031655976	0.707876253318322	0.4338242338810483	0.4522801765525612	1.510114735629546	0.0628723297238463	0.4425424428377448	0.1119073209249642	0.4091808337172113	0.424483862386617	0.0101648195180842	0.5143398675527151	49.99999999386611	1.0936700079871046e-10	0.4653266420460988	0.9881422924886812	0.2311845860151837	0.1387107516795923	1.9719705091927948	0.0693204831884458	0.0559225324896143	3.0487381652451025e-10	0.2499999999773672	0.1254925242366898	5.081230272826614e-10	1.1053307957848686	67171.53572182152
99	B-3	3	4D	0.49	0.9803921568627452	19.81981981981982	800.0	12.478102	12.526348654069052	12.4448531312891	21.9658771715634	0.794347359877694	0.71323191510862	0.4336927580075274	0.453656420700534	1.5101973914870404	0.0628807211608897	0.4460318101338001	0.1118199234587955	0.4082349805666416	0.4264036770322953	0.0102030932571354	0.5162765188110556	49.99999999999999	6.0161311710545485e-25	0.4645853668253759	0.9881422924901186	0.2355500660754712	0.1413300396452826	1.9722985702551423	0.0766561814903116	0.0561342000560815	9.942668064508108e-23	0.1968216114761	0.1271796526079824	1.6571113440846844e-22	1.1112629791568724	0.0788672278760265
100	B-3	3	4D	0.55	0.8	15.068493150684931	800.0	12.388475	11.097920247214123	0.0022656183806405	2.63581485029519	0.0038228383317601	0.224846393971133	0.1909796397820374	0.1936373432928116	1.5061325686591038	0.0707471990763558	0.4139161615018612	0.1140370012490462	0.3893280742544343	0.4082350959755377	0.0066951609791013	0.2320254572796424	34.05569506153764	1.4548974572591638	0.4665113811445336	0.9826868282706612	0.1044319055625569	0.0717001077244323	1.960035007275968	0.0935311347414786	0.0645773583411475	0.0865728183182721	0.1	0.1441605446010321	0.1260941534655103	0.4973629082968864	0.035994101407189
100	B-2	3	4D	0.55	0.8	15.068493150684931	800.0	12.388475	11.097920247214123	10.9497799784967	19.3826460491641	0.81972900168578	0.689163117766052	0.2369273205930696	0.2320866211323653	1.5140945467356208	0.0670423889368062	0.3795688422568273	0.1047153391794075	0.3254599927337394	0.3874856221256887	0.0072022914147559	0.3108856203788527	42.56482109317545	4.274846104440642	0.4359615011664946	0.9860997918025688	0.2134916163793953	0.1701311392850712	1.9739842389183369	0.1447804915724107	0.0591691292495303	0.1968984551727396	0.2262616230834486	0.2385785060997659	0.2470809849042297	0.7131033807962892	0.057280454454914
100	A-2	3	4D	0.55	0.8	15.068493150684931	800.0	12.388475	11.097920247214123	11.1348620372586	19.6391526720691	0.82217992174757	0.689596783853864	0.2326416958055232	0.2288663754157438	1.5140497436532152	0.0672607641901619	0.3837719529308479	0.1053070333180432	0.3270164102693216	0.3901025555643426	0.0072100707630941	0.3067449403478368	41.94395697722635	4.723941728723061	0.4382934324826397	0.9858969394802372	0.2087425688594739	0.1642507346676374	1.9740683834261583	0.1437625892060441	0.0591045341317225	0.186857877456761	0.2256977808438269	0.2346901572480388	0.2374734787693972	0.6998620504312181	0.0564196354534532
100	A-3	3	4D	0.55	0.8	15.068493150684931	800.0	12.388475	11.097920247214123	11.0900800620076	19.4421028641291	0.821402955486468	0.694440728047256	0.1287668780579479	0.2175872860726785	1.5163468367153483	0.0513625814593366	1.0897768226916194	0.1255312758738379	0.2664837234590903	0.6449235236613855	1.6944022307447894e-13	1.26358571555647e-12	6.857412960327903	34.70474437239639	1.5475399894400724e-12	0.919543144091404	0.5496750553956316	0.5989251944944324	1.9779525812200616	0.3433195242633784	0.0735113539786692	0.4895986430807793	0.2409320423493113	0.7335162765393622	0.4493385212893313	0.8165124805683744	4472137.417632672
100	B-1	3	4D	0.55	0.8	15.068493150684931	800.0	12.388475	11.097920247214123	0.0158680568546787	7.90119741263305	0.0122281517010062	0.164236626988491	0.2924864782590309	0.2742608007642761	1.5155922494834764	0.0660571943930728	0.3376871108598265	0.1	0.3211957352378153	0.360127708858213	0.0083514297385196	0.3990230381351534	47.179009179077575	1.3488697854532674e-13	0.4673088452797279	0.9874421841241792	0.2327416009709106	0.180590514572953	1.9727961227715127	0.1231932851974685	0.0574832223279789	0.1759270960567308	0.2321326538624319	0.2114954194824566	0.2267314763858538	0.8538743534723826	0.0761107208009917
100	A-1	3	4D	0.55	0.8	15.068493150684931	800.0	12.388475	11.097920247214123	11.2169589110936	19.598787131889	0.823185383185244	0.695261662811004	0.2352496728548029	0.2309011120471223	1.5141189582252406	0.0671679958624365	0.381515124952524	0.1049703320543025	0.3258738664495705	0.3887001995725516	0.0071938056407709	0.3091074380145669	42.3685556505308	4.403467763670497	0.4362475134098568	0.9860363004779616	0.2127268339787516	0.1685512205109371	1.974058558235084	0.1450757582934697	0.0592227687128892	0.1923364314620172	0.2257348641077632	0.2378786201405727	0.2427459142666437	0.7085597705726263	0.0570859221223677
101	B-3	3	4D	0.5	0.8	22.0	3500.0	12.800308333333334	12.821331142162414	12.7529582213008	21.3863860998651	0.815792155574385	0.730960668154345	0.1886629790961047	0.187133808562381	1.509987066567381	0.0674973579936971	0.3918946974067194	0.1182128741931204	0.3966879777239147	0.3950970787839849	0.0044422037623969	0.1921858982653457	42.66363862283618	5.251991967768059	0.4073974441904234	0.9861315409637484	0.1488425820886307	0.0924208526823012	1.972463972957461	0.1552210467294474	0.0616099632849882	0.0209301893679036	0.1	0.1959145780856619	0.0337077979558543	0.4717405595100279	0.0472653733912593
101	B-2	3	4D	0.5	0.8	22.0	3500.0	12.800308333333334	12.821331142162414	12.7006378048814	21.5516595726262	0.815737543308864	0.722427653915273	0.1335885557368648	0.224598870585553	1.5110705254652812	0.0579939278220108	1.0812732898164954	0.1504254420700615	0.3485887660702099	0.6431276202184312	4.657969472233661e-13	2.7947871611028174e-13	1.1759979650083352e-06	0.0092882110652183	4.337650520582634e-13	1.95999276676805e-06	0.4377210325363622	0.4197101044782582	1.9767286719622248	0.3316785444718895	0.0795962930340144	0.3588529526357456	0.1975599048239	0.6514112339293563	0.3742523310266832	0.6443089750640907	0.0135396089556053
101	B-1	3	4D	0.5	0.8	22.0	3500.0	12.800308333333334	12.821331142162414	12.9013005948665	21.6162736784916	0.816328008422755	0.73111882526062	0.1894367901674071	0.1838012022767267	1.5099110183321578	0.0676342505960983	0.3702508267496501	0.1160223846117906	0.4020018671369142	0.3816032066573898	0.0037046487819649	0.1874049809459086	49.98643665716421	7.366374412980496	0.4098838925851382	0.9881391131763968	0.1420415528866393	0.0860086142751272	1.9721429597255409	0.1461724431398801	0.0608188557595443	0.0055172766505103	0.1	0.1881142402779476	0.0091116750310244	0.4572147974977626	0.0833600751203444
101	A-2	3	4D	0.5	0.8	22.0	3500.0	12.800308333333334	12.821331142162414	12.7735133413853	21.679511365088	0.815951551610426	0.722098601545687	0.19749175807029	0.1909749020189029	1.5103231351455226	0.0670982581253407	0.3670018834453455	0.1125795287025538	0.3939986847585728	0.3795255104754801	0.0048671025171872	0.2092311003570974	42.38884184547946	4.574164588926003	0.4316628911956485	0.9860428898699652	0.1408391480235269	0.0845034888141161	1.9719433810872933	0.1339002301077141	0.0596040657472883	7.628940989656305e-22	0.1634078106480462	0.1743384240457786	1.2714901649427173e-21	0.4847094911901165	0.032070633160567
101	A-1	3	4D	0.5	0.8	22.0	3500.0	12.800308333333334	12.821331142162414	13.0621836414626	21.8594439625759	0.816279950134535	0.732044606655947	0.1897304901032177	0.1873235267761741	1.5100302360853803	0.0675003561989263	0.3873137768961954	0.1173026303796482	0.3963524087656397	0.3922904612085819	0.0044826084830926	0.1940079432653282	42.68014458480585	5.1266809378117815	0.4104957714401778	0.986136830046297	0.1477586165875798	0.091287145698858	1.972133715778022	0.1523738281157546	0.0613067487289771	0.0178126718231023	0.1	0.1931518197941824	0.0288318330709192	0.4726186157403604	0.0613621881031641
101	A-3	3	4D	0.5	0.8	22.0	3500.0	12.800308333333334	12.821331142162414	12.7373932490779	21.3467666352548	0.816122699387596	0.731127294836957	0.1895227125913501	0.1884475987814403	1.5099155448793655	0.0673802447919173	0.394327256109784	0.1181542059036645	0.3961408399165463	0.3965769354976288	0.0044579332268708	0.1916866020135868	42.398984564903046	5.092764675301885	0.4029496369995117	0.9860461821117112	0.1529908500065199	0.0955743851239102	1.972589261632728	0.1615621750778567	0.0619404511109895	0.0247065436909277	0.1	0.2009095230839421	0.0395490393696776	0.4757085859189374	0.0479701975651365
102	B-2	3	4D	0.51	0.979591836734694	20.183486238532108	2920.0	12.74312	12.881626832218451	12.7713139092111	22.1633856163062	0.797737946648676	0.722335943536406	0.1500789068508116	0.2513206248599038	1.5123847199932363	0.0559220960925664	1.0745899216185868	0.1406778330468613	0.3617605515427811	0.6417033255401025	1.3572277968825548e-15	1.4056984011135766e-15	0.4357129468924485	20.09850410517141	2.023416220507672e-15	0.4206889063227036	0.5158808917208989	0.4433947712442582	1.9774273502001485	0.342531190951728	0.0800059767989431	0.2594905885448903	0.162124707478816	0.6382394484572167	0.3019120767618939	0.6947153961041636	1410.3491166415768
102	A-1	3	4D	0.51	0.979591836734694	20.183486238532108	2920.0	12.74312	12.881626832218451	13.1906647068343	22.518398804149	0.798847468271447	0.733272354483039	0.2187560417571725	0.2281642200467378	1.5118600132576747	0.0671421622214984	0.4430076271905156	0.1219389670702328	0.416286812517526	0.4247405442123348	0.0042720579889546	0.2161661342411048	49.99999999999999	7.890584962038579	0.3943962422286539	0.9881422924901184	0.1648208156080369	0.1037634435120383	1.9742974788090084	0.1512631156117231	0.0618569881566958	0.0295530278093024	0.1	0.18931694525382	0.0469428729651894	0.548093797799881	0.064683650075909
102	A-2	3	4D	0.51	0.979591836734694	20.183486238532108	2920.0	12.74312	12.881626832218451	13.0034418543996	22.5791706184716	0.79514877639591	0.724272406653061	0.2260719657611456	0.2330745844793075	1.5121742853747824	0.0668098993685613	0.4309751750712888	0.1192263016265228	0.4131291767608904	0.4180267241075792	0.004489746667197	0.2271811813601713	49.99999999999999	6.657318561269442	0.4026830065601882	0.9881422924901184	0.1662561840443586	0.1039130162027677	1.9742623105029948	0.1445142699087291	0.0612300217158586	0.0250174500278609	0.1	0.1841878166789216	0.0400268024944675	0.5641687820422465	0.0667346638098325
102	A-3	3	4D	0.51	0.979591836734694	20.183486238532108	2920.0	12.74312	12.881626832218451	12.8363902406657	21.9423991813515	0.797141353574273	0.733877309869037	0.2200739830013888	0.2299096138474298	1.5117608739349977	0.0670332137574553	0.4446923834971391	0.1217882599196071	0.4158028494307239	0.4256682546191425	0.0043274836983893	0.2189706751384992	49.999999999999936	7.670745859099332	0.3960192405210947	0.9881422924901186	0.1655771521723334	0.1040490960873078	1.974429024254629	0.1494536849482919	0.0617417226440538	0.0284024983049174	0.1	0.1881779100481814	0.0451979398260377	0.5529293850732369	0.066514502737082
102	B-1	3	4D	0.51	0.979591836734694	20.183486238532108	2920.0	12.74312	12.881626832218451	12.6228794933933	22.4246908938018	0.793843552150533	0.709082960319404	0.2176130167662235	0.227282022430441	1.5117360395805934	0.06727240945378	0.4444321107620352	0.1224357520231872	0.4173815463754761	0.4255251310090132	0.0042561032055309	0.215358822199868	49.99999999999999	8.13651444516134	0.3954857373855503	0.9881422924901184	0.1623899713370251	0.1019017313511846	1.974308276339224	0.1499493118280273	0.0617039551816112	0.0275124659003548	0.1	0.1871327162389736	0.0438436961740352	0.5445425759814936	0.067435691035484
102	B-3	3	4D	0.51	0.979591836734694	20.183486238532108	2920.0	12.74312	12.881626832218451	12.8650707888067	22.069606184632	0.796504210553063	0.731862543536584	0.2188856435188629	0.2291436074457601	1.5118394764331902	0.0671059128569237	0.4468644894292173	0.122297713800105	0.4155061168888501	0.4268599173450439	0.004283073158599	0.216723501825112	49.99999999999998	7.649693169919248	0.3929847386347941	0.9881422924901184	0.1672028548451768	0.105613598549988	1.9744060254039404	0.1532332899150951	0.0620097283244501	0.0316494933521438	0.1	0.1915091444763557	0.0501061010659265	0.5514807078208602	0.0659418388332795
103	A-1	3	4D	0.49	0.7058823529411765	18.181818181818183	800.0	13.020683333333332	11.371944611036932	11.2265770123086	20.7285968551626	0.807580229639895	0.670643587422571	0.3143395833477228	0.2976970322435125	1.510043320527299	0.0658000170188599	0.3470555030742016	0.1026511199292192	0.3575822918212775	0.3664574060840549	0.0100165536642314	0.4053789181415428	39.8708976490714	1.5104311745174542e-16	0.4869256556327053	0.9851745319512633	0.193345962247123	0.1294513840286517	1.9685698004723189	0.0836547107527781	0.056383276015527	0.0695323891129147	0.25	0.1554920525460171	0.1038521664426727	0.8325273344137071	0.1075013364101838
103	B-2	3	4D	0.49	0.7058823529411765	18.181818181818183	800.0	13.020683333333332	11.371944611036932	11.3854430601095	20.1945336751404	0.809594578755758	0.696383568637305	0.30212742915066	0.2909205879068208	1.5101981424113318	0.0658519520672073	0.3629069056214329	0.1047273000942282	0.3537042209907113	0.3768868033895999	0.0093894165700056	0.3809962554264699	39.97720227724872	9.035914441369264e-15	0.4632191372071613	0.9852133718855128	0.2020992946212769	0.1505799509994539	1.9696993875053328	0.0992931806010616	0.0575861083312948	0.1450790527578665	0.2499999999989701	0.1830766418021274	0.1947163220075305	0.8224967943327447	0.080583496516705
103	A-2	3	4D	0.49	0.7058823529411765	18.181818181818183	800.0	13.020683333333332	11.371944611036932	11.269727929398	19.8963755309039	0.808544135497264	0.700544504814849	0.2921623417907181	0.285274418294098	1.5102494977446386	0.0660698395462294	0.3764243281512508	0.1066310036584534	0.3508072253806536	0.3855130574879957	0.0088664525597342	0.3605873145079502	40.068724281625926	0.1106050796011112	0.4434208859891036	0.9852466481160048	0.2097528693493471	0.1673325165026881	1.9703288301039883	0.1129472938887883	0.0583552965423115	0.197760321571539	0.2499999999989666	0.2057718886302429	0.2478944066583348	0.8131942493047364	0.0753956947910927
103	A-3	3	4D	0.49	0.7058823529411765	18.181818181818183	800.0	13.020683333333332	11.371944611036932	11.2754639527763	19.8556960892313	0.8097796703056	0.701265436907495	0.1700859780128095	0.269909435487413	1.5123406399492143	0.0497255453788186	0.9868999822377224	0.1199405296216521	0.2772280928666819	0.621904337566425	3.488294973068974e-18	2.604713492971093e-18	0.1467010425094545	0.7057096764429784	2.6753409076510925e-18	0.196465565410801	0.6019221083142355	0.7036911570658516	1.9733849556422087	0.3383896483177489	0.0733686847865005	0.5690734521060111	0.2499999994133964	0.7227719071333181	0.4867730518393534	0.9736005925532648	0.15005341976182
103	B-1	3	4D	0.49	0.7058823529411765	18.181818181818183	800.0	13.020683333333332	11.371944611036932	11.5291438615714	20.1548740177186	0.809419642682268	0.706713245412445	0.1659372026925772	0.2643154481517909	1.5123726223504774	0.0499703672733906	0.9928643116967178	0.12040578600298	0.2767056079019469	0.6233200809421862	1.0715681647761904e-18	2.32876274607814e-17	21.13228752614659	20.098661418266467	2.437926787173271e-17	0.9723913095076564	0.589790776273021	0.6909071443930391	1.9734289829813303	0.3372939506473146	0.0732894995569103	0.5714444718159009	0.25	0.7232943920980531	0.4878118302356091	0.95522259254483	328281.9286627384
103	B-3	3	4D	0.49	0.7058823529411765	18.181818181818183	800.0	13.020683333333332	11.371944611036932	11.5453118500578	20.3294319581669	0.810663172329404	0.700551359868021	0.3101289702670233	0.2956975309921057	1.510373329130783	0.0658217437694298	0.3534663296289538	0.1032474606182914	0.3563300838920819	0.3707171597412433	0.0098959937753871	0.3995638633054553	39.77632524580116	2.264470050257228e-14	0.4814941283215458	0.9851398066478972	0.1950393619012048	0.1345802170597912	1.9694655216970007	0.0896814487875165	0.0564574672441292	0.0900156755432859	0.25	0.1621757877863724	0.1304545370978881	0.8298416113573521	0.1004817081493295
104	A-2	3	4D	0.48	0.7884615384615384	22.0	2015.0	14.548198333333334	12.320129883105515	12.1876214297896	20.9782124847549	0.808268771543698	0.718777834792135	0.1710334164277963	0.2673799955645112	1.5124200722423446	0.052480495725712	0.96332020460685	0.1277675013498141	0.3070758851390039	0.6162014677275341	1.3586471443083108e-16	1.1936359411380332e-15	8.185474183922235	0.7863222026999637	1.3708460589388209e-15	0.931705450674703	0.5298150272037758	0.6033493860131923	1.9753531543289584	0.3394635536283947	0.0740869970727929	0.5387925125444469	0.2499999999469757	0.6929241148609947	0.4731261459917774	0.8707293815777047	0.0823423407434002
104	A-3	3	4D	0.48	0.7884615384615384	22.0	2015.0	14.548198333333334	12.320129883105515	12.2128636289788	20.7384332469782	0.808269151570543	0.728593950209991	0.2711419456950013	0.268728837375487	1.5107113881090464	0.0657859663996944	0.391100202835349	0.1092089357830073	0.3748433583800929	0.3946121711169928	0.0075162438619741	0.3115793660874753	40.85413211827816	2.9874782463048177	0.434614524912254	0.9855261714733756	0.1810606852889456	0.1366014905938142	1.9710502227166689	0.1105562272700696	0.0582614840007897	0.1544514170805154	0.2499999999850221	0.1905421167076532	0.20472016300028	0.7169096940567765	0.1019183375473816
104	B-1	3	4D	0.48	0.7884615384615384	22.0	2015.0	14.548198333333334	12.320129883105515	12.474510344827	21.1363174626115	0.809157581710643	0.729392135645003	0.2693151347978565	0.2661993657424613	1.5107266101525323	0.0657553919394805	0.3884307688176016	0.1090106205513806	0.3769705568743013	0.3929772130447308	0.0075567658312539	0.31020324765448	40.44973669708185	2.9706655221978058	0.4392853855469331	0.9853835846883116	0.1782681508233579	0.1297516495505066	1.971065801345785	0.1087842990111503	0.0580877283523066	0.127845377602389	0.2499999999999776	0.1837440575787655	0.1756490891286927	0.7061542629474479	0.1087758899505828
104	B-3	3	4D	0.48	0.7884615384615384	22.0	2015.0	14.548198333333334	12.320129883105515	12.475181233842	21.1873530140009	0.808008888549385	0.728708814203117	0.2667759283904385	0.2634865774809091	1.5106597839359188	0.0657588032776782	0.3876699860839193	0.1088985448856983	0.3771762068430534	0.3925096353499804	0.0074778859268933	0.3064278743924578	40.37787494864361	3.1207063022751056	0.4386458864026992	0.98535795229128	0.1765987930242532	0.1286624273160151	1.9710759850809687	0.1095343174932791	0.0581882447227229	0.128557795399798	0.2499999999996833	0.1841779067542473	0.1764551779028754	0.698576879189382	0.1028425564271342
104	A-1	3	4D	0.48	0.7884615384615384	22.0	2015.0	14.548198333333334	12.320129883105515	12.3360372367319	21.0044393410155	0.809033181186622	0.72593584958528	0.2761841024267666	0.2745146206068338	1.5107681816797056	0.0656207474609737	0.3939551849463331	0.1093415779819738	0.3747433584348061	0.3963510537626544	0.0077622911258601	0.3199950296764549	40.624301496549975	2.9844987178821927	0.4368292364112242	0.9854454780743775	0.184958099737273	0.1380306721213603	1.9709180076415005	0.1092857850006731	0.0583381845769679	0.1462807647647137	0.25	0.1884274051539696	0.1960130445152675	0.7325403224046491	0.1078559666492644
104	B-2	3	4D	0.48	0.7884615384615384	22.0	2015.0	14.548198333333334	12.320129883105515	12.2345654244638	21.0532415368753	0.807905868705506	0.719297932142784	0.269565119533808	0.2669907761817676	1.5107447144741966	0.065608436851093	0.3904500131304357	0.1091368416293146	0.3755518131125744	0.3942147589017357	0.0075114121411391	0.3091986716837708	40.56385386315394	2.7960342362387287	0.4349218479509757	0.9854241052843437	0.1815364821800215	0.1347398217043444	1.9711374977182807	0.1116216084938663	0.0584519859794649	0.1422189748654986	0.2486775453828939	0.18952633893645	0.191613229628454	0.7109292695698829	0.1049426052129008
105	A-3	3	4D	0.46	0.6111111111111112	19.29824561403509	2159.0	12.588851666666669	11.04900433273532	11.4743532122218	19.7873521836285	0.821267311322908	0.70608338781536	0.1855679745931617	0.1796530981316207	1.510631264775426	0.0682132484318945	0.3681255535902207	0.1087599015062604	0.3622960750963036	0.3802456739469945	0.0071553682756715	0.2404343062955557	33.001947102155206	7.235484203977095	0.484870043407564	0.9821438918948384	0.126310505861643	0.0757863035169858	1.971157777772436	0.1076255657162495	0.0566976044080195	1.4589075270510534e-23	0.2494277121588664	0.1528338814961322	2.4315125450850896e-23	0.4958737079441623	0.0180385106743757
105	A-1	3	4D	0.46	0.6111111111111112	19.29824561403509	2159.0	12.588851666666669	11.04900433273532	11.7549802531193	20.2357763624892	0.82256285460318	0.706208497755211	0.1827787550120625	0.1767736328177773	1.5105056979316258	0.0682916904331742	0.3671454037757896	0.1092937586472612	0.3637900153396708	0.3796175862930573	0.0069367353696611	0.2337978518986588	33.10430605169259	7.230832137625475	0.4811425933429236	0.9821981203505636	0.1255844715307319	0.0753506829184391	1.9711952130180683	0.1101943470903639	0.0570213232519871	1.1543249537389474e-17	0.1721057898204861	0.1550673913174055	1.923874922898245e-17	0.4859221676348753	0.0175299418230891
105	B-2	3	4D	0.46	0.6111111111111112	19.29824561403509	2159.0	12.588851666666669	11.04900433273532	11.5340593833063	20.0889415234078	0.821668103460059	0.698761068343052	0.1852800094431669	0.1788744554899801	1.5105713448966287	0.0682398315253556	0.3654277114274889	0.1089324399523818	0.3635833918701761	0.3785137997408057	0.0070694582753001	0.2376609500738092	33.017986105691705	7.125294755266951	0.483073863767901	0.9821524109709112	0.1257350239839642	0.0754410143983478	1.971183186110876	0.1086823546254814	0.0567760013537163	6.33817891888014e-11	0.2499999764281497	0.1533427443619225	1.0563631530351e-10	0.4919764199621372	10124.067560116751
105	A-2	3	4D	0.46	0.6111111111111112	19.29824561403509	2159.0	12.588851666666669	11.04900433273532	11.0689648604106	20.1058785040713	0.818942041138191	0.672249964986468	0.1879062594468398	0.1823677487707282	1.5106835243011227	0.06814814889559	0.3705251400756105	0.1087649329825417	0.3625292823448133	0.3817779929397233	0.007297080441563	0.2442649079655779	32.87433400545797	7.222637580521302	0.4855747926027832	0.9820758196443228	0.1263628333765271	0.0764101529125772	1.9713379927432328	0.1054766311676978	0.0565151663309447	0.0046885058749485	0.2382677381298708	0.1518959250524034	0.0077535885491399	0.5030428096488834	0.2766714957226662
105	B-3	3	4D	0.46	0.6111111111111112	19.29824561403509	2159.0	12.588851666666669	11.04900433273532	11.6960955944281	20.1117149572011	0.822671240369312	0.706912219647387	0.181785571502149	0.1741224966999002	1.5107991562488077	0.0682222658458689	0.3578455278990159	0.1087136102918998	0.3636724931518064	0.3735941939238693	0.0067565751551395	0.2296243882613969	33.38532288754737	6.770797519676582	0.4795938224536638	0.9823453200081308	0.1250706838233203	0.0750424102940274	1.971304268919712	0.1132761495298051	0.0570570843846802	2.814566068213394e-13	0.1000000500023817	0.1567336843945298	4.690943447020123e-13	0.4787892952553246	0.0157737047840696
105	B-1	3	4D	0.46	0.6111111111111112	19.29824561403509	2159.0	12.588851666666669	11.04900433273532	8.76557269292582	20.1330230800846	0.808579563559001	0.538453920891303	0.1811572190793054	0.1754527805298786	1.5104978443549202	0.0683319516554993	0.3685111165957479	0.1099973878929404	0.3647354810367482	0.3804923973315247	0.0068207594341674	0.2305780904392393	33.20533981072512	7.1534508529080645	0.4793313077108458	0.9822513246913246	0.1250171558733505	0.0750102935240103	1.9712163653623416	0.111824938072096	0.0571633888081642	8.476261750735432e-23	0.1957130088376048	0.1559332112524059	1.412710291789238e-22	0.4810411644931283	0.0175435544524197
106	A-1	4	4D	0.49	0.803921568627451	22.0	1132.0	8.176443333333333	12.168893317495984	12.2587350102541	23.1786764982577	0.809834415068266	0.653071594360867	0.4645512789313442	0.4644136671847742	1.5059075349276103	0.0663108463407582	0.3997037749053525	0.1131831674109195	0.4016189136286419	0.3998222122780267	0.0113571062986258	0.5404877327724371	46.99026802785431	1.3576541161680924e-14	0.4674067784902403	0.9873923803150504	0.2524211242948935	0.1514526745777234	1.970434487566776	0.079716986418792	0.0568228928381189	3.119181078982473e-12	0.2499999999997138	0.1309743078811176	5.198635131610429e-12	1.1563540745349348	0.0508556295278751
106	A-2	4	4D	0.49	0.803921568627451	22.0	1132.0	8.176443333333333	12.168893317495984	12.1895089802068	22.947807649445	0.807619181807403	0.657715967397885	0.2628910411089023	0.4225165545228793	1.5083367693935856	0.0509094688015722	1.0071926709280763	0.1260994006421125	0.3226021769463659	0.6266782378658254	2.1607838670471138e-13	6.525963780389288e-13	2.420183499105604	49.97431386512376	4.982739965311159e-13	0.8013365743579209	0.8143505507946954	0.8871973430151218	1.9741362281776271	0.3566861056067803	0.0735418714749669	0.489453850248321	0.25	0.6773978230531358	0.4492653361468768	1.3097138975386535	0.2865701988253574
106	A-3	4	4D	0.49	0.803921568627451	22.0	1132.0	8.176443333333333	12.168893317495984	12.6216090301149	22.9213983534463	0.807430846096035	0.681974722438686	0.2556884017766838	0.411593669821188	1.5079331242182286	0.0506693720161865	1.0097471256465926	0.125517193075776	0.3225694772876133	0.6272706498798709	9.946905426433234e-13	5.0229868685527166e-11	49.89798558659728	49.88768047047864	3.936557744718229e-11	0.9881183379291224	0.7898145813643966	0.8643908816805502	1.9738230210049308	0.3554633246581969	0.0734826104388863	0.4944225417911679	0.25	0.6774305226730212	0.4517656781648336	1.275984551551968	3849329.170725214
106	B-1	4	4D	0.49	0.803921568627451	22.0	1132.0	8.176443333333333	12.168893317495984	11.813306475048	22.9872683821091	0.808896646376019	0.635317868084052	0.4579421593210604	0.457228046912993	1.5064676804921204	0.066057923378501	0.3984406056670431	0.1125038744948951	0.3997625983978954	0.3990629020950635	0.011255861324768	0.5371906226079168	47.1254123081502	1.4987742616849583e-16	0.4696752978707561	0.9874280813725408	0.2488837788943432	0.1493302673366113	1.9704100527139057	0.0776374790999299	0.0567152382147332	2.1648995580191515e-14	0.2499999999999965	0.1305621037313485	3.6081659300317896e-14	1.1437489368575209	0.0533757667801836
106	B-2	4	4D	0.49	0.803921568627451	22.0	1132.0	8.176443333333333	12.168893317495984	11.8259129853298	23.2371374315059	0.80645144280895	0.631064615335993	0.4595672174355461	0.4591502685202883	1.5062091119197072	0.0659819874401572	0.3990927357317077	0.1127729621798778	0.4016110797442697	0.3994551471134692	0.0112525294836675	0.5355343052830724	46.992348552418726	1.6848409510303549e-07	0.4684229223647478	0.9873929314637802	0.2476439099056759	0.1485863459448128	1.9703010606549087	0.0769742271092898	0.0567244425953633	5.682824751091449e-12	0.2499998675687657	0.1299659978909826	9.471374585062706e-12	1.1432709197481734	0.0527507389481327
106	B-3	4	4D	0.49	0.803921568627451	22.0	1132.0	8.176443333333333	12.168893317495984	12.3042874240223	22.7219579194751	0.807454094380853	0.670645284492912	0.2516270745093336	0.4044866748674965	1.5083427697522571	0.0504919579557312	1.00748470988758	0.1247753151647435	0.3212200763200198	0.6267460609053251	1.4772928442121502e-14	7.133830034194333e-13	47.689884176612615	49.71686619953614	5.665277919942907e-13	0.987575037500492	0.7798352113972697	0.8547331083452192	1.9736331060771608	0.3547862673350837	0.0734850285069982	0.496043235613523	0.25	0.6787799236794136	0.4525763395965461	1.259219783213429	7457031.100754089
107	A-3	4	4D	0.0	1.0	22.0	800.0	0.0121666666666666	0.0	0.0007247862899502	0.111239399404958	0.0386177968569073	0.16871894091179	0.3119133647796422	0.5222536554322275	1.4923324993635725	0.0589909987713707	1.0743548510695735	0.2007699592381073	0.7947261282400231	0.6416530225855519	0.0017245310340189	0.0010347186204113	1.1471680304795204e-20	10.584725650884202	0.0015745565674151	1.9119467174658682e-20	0.1723509308687917	0.1338608461306649	1.9579002931588216	0.5044518798259858	0.0899999999999999	0.1766760844046221	0.1	0.2036993151925616	0.2274771786491365	0.6571492201833038	0.1693883053274006
107	A-1	4	4D	0.0	1.0	22.0	800.0	0.0121666666666666	0.0	0.009201163824812	0.108134777751514	0.293030785678767	0.290378275540241	0.3690564734753265	0.5143014755866773	1.4923481652592572	0.0595307237213148	0.7935576600069072	0.1627727757955516	0.7410489541149684	0.5694473094159405	0.002452955082397	0.0784044405602943	31.36325979343984	32.396336362644924	0.1129717324044178	0.9812284477904488	0.1426521919303234	0.1013123032038745	1.9193642566748068	0.2282058429135747	0.0899999999999999	0.1102050226705191	0.1	0.1459793134806138	0.1551735332089391	0.6940182193508462	0.1733776037166051
107	B-2	4	4D	0.0	1.0	22.0	800.0	0.0121666666666666	0.0	0.0047219959261323	0.11699686233199	0.156122880420089	0.258514458565946	0.3128064396488346	0.523574498605408	1.4927240322050392	0.0589547254066181	1.073797058632129	0.2000253373852682	0.7928933195418264	0.6415336035478902	0.0017213647305295	0.0010328188383177	1.2470876150867481e-14	10.29305503604733	0.0015640852627092	2.0784793584778704e-14	0.1748850013367053	0.1357267851414185	1.957197326620994	0.5017416284799281	0.0899999999999991	0.1760916265203576	0.1	0.2055425951954644	0.226895408355161	0.6603341025851442	0.1653667650395074
107	B-1	4	4D	0.0	1.0	22.0	800.0	0.0121666666666666	0.0	0.0054553957448126	0.114601609977585	0.166082445405484	0.286623510593301	0.320039252106395	0.529865815428717	1.493103593295155	0.0586668589232964	1.055627589245104	0.1961151322814381	0.7860934194920753	0.6375996607585075	0.0017012349396966	0.001020740963818	2.668326785011586e-22	9.925067242268792	0.0015143414262611	4.447211308352645e-22	0.1850004922197416	0.1431628660935143	1.953303318075688	0.4986749333513042	0.0899999999999999	0.1738512712899541	0.1	0.2123922390816637	0.2246572148161708	0.6740494224860493	0.1890379701724263
107	B-3	4	4D	0.0	1.0	22.0	800.0	0.0121666666666666	0.0	0.0080091917850693	0.108389981779614	0.25679885470234	0.287744126495415	0.3273676688048681	0.5347180250679798	1.4932855178552125	0.0583905340353014	1.0333867880725438	0.1919367264274884	0.7786016421112953	0.6326650831380717	0.0016649396490615	0.0009989637894369	3.3353072964733213e-19	9.686024627430944	0.0014545887933485	5.558845494122207e-19	0.1960929484268964	0.15105015386015	1.9498193161077733	0.494559522994765	0.0899999999999999	0.1702987540954925	0.1	0.2199437690953561	0.2210814352094628	0.6867671427175668	0.2132795931974634
107	A-2	4	4D	0.0	1.0	22.0	800.0	0.0121666666666666	0.0	0.0	0.191895784953978	0.0006553249719857	0.0	0.2997670614758368	0.5092373740186581	1.4913947830898908	0.0596669345266692	1.0987769487132455	0.2069475890049298	0.8047317719870122	0.6468047200343308	0.0017519657822991	0.0010511794693794	1.305229545666691e-21	10.777382112861709	0.0016611457843216	2.175382576111152e-21	0.1567619996053676	0.12251530954482	1.96279108580204	0.5154905186320901	0.0899999999999999	0.181537042479937	0.1	0.1936070822286661	0.2322820706026833	0.6328038630328576	0.1390785252938481
108	A-1	4	4D	0.51	0.979591836734694	15.068493150684931	1770.0	12.693058333333331	13.011107578487602	13.1849818117073	22.2672842512007	0.799520818114713	0.740597949759554	0.1915737094064916	0.2169539380517554	1.5084965596646949	0.0681353796227729	0.5324828376706461	0.1380279111631666	0.4365934813189321	0.4701906465672243	0.0034101177702198	0.1725519591731252	49.99999999999999	12.320954680430924	0.3472398852968755	0.9881422924901184	0.1642719044122783	0.107418466822759	1.9723960158400864	0.1802441319993129	0.0654354536801775	0.0539065046276416	0.1	0.2161666333841922	0.0824376332796047	0.4969243640476396	0.0683379555957544
108	A-2	4	4D	0.51	0.979591836734694	15.068493150684931	1770.0	12.693058333333331	13.011107578487602	12.9821410964235	22.2534455826892	0.798423184923732	0.730660990618578	0.1419669717744308	0.2365164011442783	1.5080692277591663	0.0592190012574301	1.0659959579899725	0.1545868394490201	0.3952164164530473	0.6398550686017862	4.294946823974813e-17	2.6207909328530828e-17	0.0102033483217001	14.589223112733515	4.379314059167484e-17	0.0167212263743936	0.4404611158225595	0.3619314145283205	1.9765604828859653	0.3514454694519128	0.0813852695724833	0.2217102521125276	0.1466453743801375	0.6047835835469527	0.2698156090209836	0.5984478156725989	1014.5351410626994
108	A-3	4	4D	0.51	0.979591836734694	15.068493150684931	1770.0	12.693058333333331	13.011107578487602	13.0523913299937	22.0988448713063	0.798030195175908	0.740118378560814	0.1412869875844474	0.2353997770955608	1.5080087397164053	0.0592941276894266	1.0661108083634523	0.1550974858528037	0.3962693798162473	0.6398798945495385	4.4352561928152203e-14	2.692205451337377e-14	0.0070011143208699	37.47570752370083	4.5320288646930144e-14	0.0115339398160791	0.4375415662230092	0.3586400076708184	1.9764640634804824	0.3520807354358979	0.0813440051054845	0.2196707132689296	0.1458629954661051	0.6037306201837075	0.2679987337754945	0.5940397847664061	0.0112941482902766
108	B-1	4	4D	0.51	0.979591836734694	15.068493150684931	1770.0	12.693058333333331	13.011107578487602	12.8831656160862	21.9355790224709	0.798347194178443	0.735667692025845	0.1399847678888357	0.2334646492061542	1.5080066724225514	0.0595993624607599	1.0677860936380763	0.1565304853645228	0.3983659103086735	0.6402416339309008	2.989769779366752e-13	1.7938641129058125e-13	7.50989516504208e-07	0.0028192538296764	3.060910132380537e-13	1.2516476275499356e-06	0.4318889757154896	0.3525911431310537	1.9765758475797384	0.3533055232289265	0.0814030644139183	0.2163930152348366	0.1443307618504672	0.6016340896910204	0.2650598562171564	0.5860557923373872	526.754919037168
108	B-2	4	4D	0.51	0.979591836734694	15.068493150684931	1770.0	12.693058333333331	13.011107578487602	12.8743339062638	22.2223525539686	0.797335505690671	0.726597052118925	0.1417796389745187	0.2355985699480664	1.507960031799917	0.0594055086972691	1.0617235849388016	0.1553603227540073	0.3967153608569032	0.6389291182732434	8.767020301132748e-17	6.090608357399396e-17	0.094718176552238	14.861792498717875	1.0255740910805995e-16	0.1363404323495714	0.4367445729551065	0.3582745017655535	1.9766584805274785	0.3520852491015504	0.0813432481036515	0.2203296021319558	0.1461618693247293	0.6032846391430965	0.268586677305489	0.59387307171362	0.0112169700026031
108	B-3	4	4D	0.51	0.979591836734694	15.068493150684931	1770.0	12.693058333333331	13.011107578487602	13.0896317104511	22.1484687365582	0.796982183660698	0.741540897724029	0.1407661021500229	0.2345706103708625	1.5080178899004493	0.0594182935615698	1.0663856339565796	0.1559214777838979	0.3973682831417816	0.6399392866971667	4.7213940631357245e-15	2.83409984580804e-15	0.0002675921369217	4.178675066507298	4.801033634182069e-15	0.0004457880792283	0.4342882474374776	0.3557397398066484	1.9767182553304767	0.3521835870787332	0.0813728975312514	0.2191327808332241	0.1456109791169583	0.6026317168582135	0.2675180214498579	0.5903103501775138	0.0110212040302258
109	A-1	4	4D	0.45	0.9272727272727272	22.0	2097.0	13.853825	13.00617156868975	13.1535338891294	22.1592531469368	0.801151929426804	0.740921924703775	0.3033780556226449	0.3117465181002975	1.5095358237316052	0.0639570168912093	0.4275842709205757	0.1153885499415733	0.4383159210211162	0.4161062824925477	0.0063329636476374	0.2967459166477995	46.25735354860323	8.921383116027624e-09	0.4172250601461057	0.987195179527635	0.1712410081765897	0.1027446049059538	1.971156500071896	0.0958880071696831	0.0590370110789041	6.067390472591775e-19	0.1977164833760729	0.144459018832778	1.0112317454319618e-18	0.7112370396540508	0.0736644180689372
109	A-3	4	4D	0.45	0.9272727272727272	22.0	2097.0	13.853825	13.00617156868975	13.1128416970949	21.9264557039526	0.801128733629019	0.746493574299715	0.3035651956268727	0.3154622059795527	1.5093115220547442	0.0639907346310913	0.4391909564207857	0.1168027800106008	0.4376198850069659	0.4226277699081033	0.0064443558158501	0.2964756419438673	45.40547369136162	0.490775949369791	0.4112810786064535	0.986958073640862	0.1782558378214818	0.1089210910494541	1.9712293229513624	0.1044599942788452	0.0596807638085885	0.0110380023488237	0.1	0.1510990363865805	0.0180643467450366	0.7208589389728742	0.1138102560788038
109	B-2	4	4D	0.45	0.9272727272727272	22.0	2097.0	13.853825	13.00617156868975	12.7993883503386	21.7254783249872	0.800256323488337	0.736191425376762	0.3075469601010284	0.3212050961984151	1.5094339840490931	0.0639634611018884	0.4444099206602467	0.1172545910034156	0.4370478541669888	0.425512925403182	0.0066635542945334	0.303064675119817	44.88093430685169	0.8806529898807088	0.4123650823183458	0.9868076588763128	0.1806606585076604	0.1106728514081293	1.9710716796893164	0.1038978379301521	0.0597677981301385	0.0126007306866791	0.1	0.1505870635146654	0.0205692387479765	0.7349426227263616	0.1137826909027171
109	B-1	4	4D	0.45	0.9272727272727272	22.0	2097.0	13.853825	13.00617156868975	12.93501107287	21.6830910328846	0.801322782395577	0.744454434732386	0.1995457390000579	0.3189467229558905	1.5103672696017658	0.05275650586097	0.9983639868942428	0.1328401156000187	0.368867593377391	0.6246161669559066	4.436658297578389e-17	2.244949024803976e-15	49.9999983372465	49.999998340199184	2.596323725667768e-15	0.9881422921004654	0.5303035160957261	0.545717803508957	1.9741943963625488	0.337503832602036	0.0762523154340468	0.429066915352016	0.227509868264401	0.6311324066226064	0.4169475365994482	0.8646645264648498	0.0759607554937759
109	A-2	4	4D	0.45	0.9272727272727272	22.0	2097.0	13.853825	13.00617156868975	12.9185096620012	21.919103422393	0.800592975827795	0.736169555532664	0.3160625273086991	0.3254433118162002	1.5092916352078347	0.0639834340961358	0.4296801540738766	0.1155269026928299	0.4375351822451443	0.4172947806888082	0.0067356942693412	0.3133139463052546	45.915464297624254	5.8020551401792716e-12	0.4212281205951978	0.9871010639351904	0.1742299033805769	0.1050533541960233	1.97086566675522	0.089763152875118	0.0589549156098841	0.0029582302330232	0.25	0.1412366971596578	0.0049061943011873	0.7438106123174781	1.3124820937717576
109	B-3	4	4D	0.45	0.9272727272727272	22.0	2097.0	13.853825	13.00617156868975	13.1177447407044	21.9120575775885	0.800757661480365	0.747609674309099	0.3020989743706097	0.3131720763989191	1.5094980890746963	0.0639708943342933	0.4366538881880648	0.1167218272751171	0.4381646313340818	0.4212147305512726	0.0063699935713598	0.2936684601557988	45.50184560878704	0.3981483398801883	0.4108767743861891	0.9869853366589376	0.1769257188753816	0.1078955557798064	1.9715009041518767	0.104714330477128	0.0596620458752574	0.0098353391787153	0.1	0.150958594279729	0.0161278603367934	0.7147360923345243	0.1179543975521344
[truncated: 60 more rows]
